# Supplementary material for: Recombinant extracellular vesicles as biological reference material for method development, data normalization and assessment of (pre-)analytical variables
Source: Springer Nature journal article supplement (doi:10.1038/s41596-020-00446-5), 2021-01-15
Supplement: MOESM3 [file 41596_2020_446_MOESM3_ESM20.xlsx]

## Sheet: 4 b
Fluorescent rEV %
112.76
98.52
93.94
97.49
97.54
91.19
95.93

## Sheet: 4 c
Time (min)	LS		Time (min)	FLD		Time (min)	Radius (nm)
-0.235653	0.000153923		-0.457751	0.0167298		40.1646	52.1763
-0.227463	7.79134e-05		-0.449561	0.0182278		40.1727	52.7494
-0.219273	1.90372e-06		-0.441371	0.0187766		40.1809	50.8097
-0.211083	-2.92745e-05		-0.433181	0.0188828		40.1891	50.0147
-0.202894	-6.04527e-05		-0.424992	0.0189102		40.1973	49.3571
-0.194704	-0.000192369		-0.416802	0.0188118		40.2055	49.1665
-0.186514	-9.42049e-05		-0.408612	0.0187134		40.2137	48.3688
-0.178324	0.000141125		-0.400422	0.0188331		40.2219	48.0878
-0.170134	0.000145573		-0.392232	0.0186623		40.2301	48.3474
-0.161945	0.000144675		-0.384043	0.0184915		40.2383	47.1309
-0.153755	0.000143778		-0.375853	0.0181071		40.2465	49.8359
-0.145565	0.000141221		-0.367663	0.0194765		40.2546	50.215
-0.137375	6.54527e-05		-0.359473	0.0196724		40.2628	50.433
-0.129185	-5.40075e-05		-0.351283	0.0196679		40.271	50.7079
-0.120996	4.40544e-05		-0.343094	0.0196634		40.2792	50.2234
-0.112806	4.42376e-05		-0.334904	0.0191848		40.2874	50.5768
-0.104616	4.38451e-05		-0.326714	0.0178324		40.2956	50.9268
-0.0964263	4.34525e-05		-0.318524	0.0177829		40.3038	49.9251
-0.0882366	-6.02205e-05		-0.310335	0.0177334		40.312	50.6727
-0.0800468	1.61891e-05		-0.302145	0.017551		40.3202	50.493
-0.071857	2.76533e-05		-0.293955	0.0170805		40.3283	50.2676
-0.0636672	2.63708e-05		-0.285765	0.0166099		40.3365	50.292
-0.0554774	2.50884e-05		-0.277575	0.015127		40.3447	50.0512
-0.0472876	2.13923e-05		-0.269386	0.0176506		40.3529	50.395
-0.0390978	1.76962e-05		-0.261196	0.0177466		40.3611	51.4564
-0.0309081	9.87576e-06		-0.253006	0.0177837		40.3693	51.8212
-0.0227183	-2.76329e-05		-0.244816	0.0178208		40.3775	51.5036
-0.0145285	0.000133048		-0.236627	0.0178328		40.3857	50.6182
-0.00633871	0.000383876		-0.228437	0.0176665		40.3939	51.3443
0.00185108	0.00063068		-0.220247	0.0175002		40.4021	51.6689
0.0100409	0.000671699		-0.212057	0.016652		40.4102	51.6674
0.0182306	0.000673354		-0.203867	0.015867		40.4184	51.6002
0.0264204	0.000669933		-0.195678	0.0150821		40.4266	51.6102
0.0346102	0.000666512		-0.187488	0.0151477		40.4348	51.444
0.0428	0.000637713		-0.179298	0.0160499		40.443	50.8144
0.0509898	0.000577846		-0.171108	0.0167611		40.4512	51.3792
0.0591796	-0.000102079		-0.162918	0.0188971		40.4594	50.7739
0.0673694	-0.000194449		-0.154729	0.0189379		40.4676	50.1259
0.0755591	-0.000139854		-0.146539	0.018933		40.4758	49.9262
0.0837489	-0.000133415		-0.138349	0.0189281		40.484	50.1998
0.0919387	-2.41315e-05		-0.130159	0.0187757		40.4921	51.1256
0.100128	-2.00363e-05		-0.12197	0.0178675		40.5003	52.4098
0.108318	-1.88628e-05		-0.11378	0.0188263		40.5085	52.261
0.116508	-1.76893e-05		-0.10559	0.0193028		40.5167	52.4897
0.124698	0.000132302		-0.0974002	0.0194725		40.5249	52.5094
0.132888	0.0001581		-0.0892104	0.0194101		40.5331	52.4559
0.141077	0.00016056		-0.0810206	0.0193478		40.5413	51.9817
0.149267	0.000155606		-0.0728308	0.0187385		40.5495	51.4064
0.157457	0.000150652		-0.064641	0.0173509		40.5577	51.8351
0.165647	0.000138286		-0.0564512	0.0174387		40.5659	50.9237
0.173837	7.43434e-05		-0.0482615	0.0174144		40.574	50.5454
0.182026	-5.35074e-05		-0.0400717	0.0173901		40.5822	50.4651
0.190216	-0.000136875		-0.0318819	0.0170494		40.5904	51.0161
0.198406	-0.00020508		-0.0236921	0.0170218		40.5986	51.1271
0.206596	-0.000147555		-0.0155023	0.0169941		40.6068	51.1616
0.214785	-0.00014502		-0.00731254	0.0173441		40.615	51.1786
0.222975	-0.000144398		0.000877247	0.0177536		40.6232	51.724
0.231165	-0.000143776		0.00906703	0.0176941		40.6314	51.646
0.239355	0.000224203		0.0172568	0.0176347		40.6396	51.4769
0.247545	0.00035822		0.0254466	0.0173871		40.6478	51.6494
0.255734	0.000415929		0.0336364	0.0133942		40.6559	51.6121
0.263924	0.000417587		0.0418262	0.016125		40.6641	51.6721
0.272114	0.000419245		0.050016	0.0167263		40.6723	51.5033
0.280304	0.000418376		0.0582057	0.016979		40.6805	51.2765
0.288494	0.000417506		0.0663955	0.0172316		40.6887	50.5837
0.296683	0.000352514		0.0745853	0.0172811		40.6969	50.9355
0.304873	0.000194582		0.0827751	0.0172345		40.7051	51.5161
0.313063	7.29199e-05		0.0909649	0.0171879		40.7133	52.7699
0.321253	4.77649e-05		0.0991547	0.0167928		40.7215	52.5769
0.329442	2.26099e-05		0.107344	0.0143951		40.7296	52.4643
0.337632	-2.32496e-05		0.115534	0.015524		40.7378	52.2673
0.345822	-0.000104866		0.123724	0.0157612		40.746	51.6477
0.354012	-0.000222864		0.131914	0.0159984		40.7542	51.0568
0.362202	-0.000151673		0.140104	0.0162358		40.7624	50.8798
0.370391	-0.000117965		0.148293	0.0163391		40.7706	51.341
0.378581	-0.00010582		0.156483	0.0163513		40.7788	51.6703
0.386771	-9.36748e-05		0.164673	0.0163634		40.787	51.8943
0.394961	-2.93993e-05		0.172863	0.0175352		40.7952	51.7091
0.403151	4.75143e-05		0.181053	0.0175511		40.8034	51.6167
0.41134	0.000138476		0.189242	0.0173223		40.8115	51.5643
0.41953	0.000154252		0.197432	0.0170935		40.8197	51.5058
0.42772	0.000124588		0.205622	0.0166368		40.8279	51.4499
0.43591	9.49251e-05		0.213812	0.0140587		40.8361	51.6573
0.444099	3.12751e-05		0.222001	0.0169738		40.8443	51.6996
0.452289	-8.93052e-05		0.230191	0.0204615		40.8525	51.7105
0.460479	-3.18962e-05		0.238381	0.0206008		40.8607	51.8382
0.468669	5.70992e-05		0.246571	0.0204198		40.8689	52.6105
0.476859	6.38128e-05		0.254761	0.0202388		40.8771	52.3787
0.485048	6.54174e-05		0.26295	0.0198169		40.8853	51.9121
0.493238	6.7022e-05		0.27114	0.015949		40.8934	51.3142
0.501428	0.0005242		0.27933	0.013885		40.9016	51.1832
0.509618	0.000609068		0.28752	0.0152842		40.9098	51.1179
0.517807	0.000614258		0.295709	0.0184035		40.918	52.6297
0.525997	0.000602901		0.303899	0.0186152		40.9262	53.0138
0.534187	0.000591545		0.312089	0.0184208		40.9344	53.4584
0.542377	0.000158321		0.320279	0.0182264		40.9426	54.3016
0.550567	0.00015428		0.328469	0.0167968		40.9508	54.3268
0.558756	-3.2336e-06		0.336658	0.013835		40.959	53.7925
0.566946	-2.86872e-05		0.344848	0.0151602		40.9672	53.1938
0.575136	5.92133e-05		0.353038	0.017759		40.9753	52.6903
0.583326	7.92034e-05		0.361228	0.0203579		40.9835	51.9154
0.591516	9.91934e-05		0.369418	0.0205671		40.9917	51.6777
0.599705	0.000196794		0.377607	0.0206299		40.9999	52.668
0.607895	0.00019758		0.385797	0.0206039		41.0081	52.6855
0.616085	0.000197349		0.393987	0.0205779		41.0163	52.7621
0.624275	0.000197118		0.402177	0.020333		41.0245	52.5835
0.632464	0.000184192		0.410366	0.0183436		41.0327	52.3923
0.640654	0.000156045		0.418556	0.0182742		41.0409	52.2782
0.648844	9.5266e-05		0.426746	0.0194616		41.0491	51.9622
0.657034	7.39914e-05		0.434936	0.0200484		41.0572	52.7625
0.665224	-5.87971e-05		0.443126	0.0190201		41.0654	54.4516
0.673413	0.000147828		0.451315	0.0179918		41.0736	54.7175
0.681603	0.000189271		0.459505	0.0156573		41.0818	53.075
0.689793	0.000196971		0.467695	0.0151866		41.09	52.7015
0.697983	0.000180264		0.475885	0.016548		41.0982	52.7905
0.706173	0.000163557		0.484075	0.0167565		41.1064	52.9277
0.714362	0.000128136		0.492264	0.0186577		41.1146	53.0227
0.722552	0.000124064		0.500454	0.0187996		41.1228	53.2831
0.730742	0.000155831		0.508644	0.0188309		41.1309	52.1519
0.738932	0.000163727		0.516834	0.0182891		41.1391	51.9326
0.747121	0.000171624		0.525023	0.0177473		41.1473	51.7823
0.755311	0.000177798		0.533213	0.0142354		41.1555	51.1799
0.763501	0.000174967		0.541403	0.0163922		41.1637	47.5377
0.771691	0.000172136		0.549593	0.0173752		41.1719	49.3322
0.779881	0.000165448		0.557783	0.0183582		41.1801	50.1845
0.78807	7.55005e-05		0.565972	0.019183		41.1883	50.2861
0.79626	8.20876e-05		0.574162	0.0191871		41.1965	50.3975
0.80445	0.000141408		0.582352	0.0191498		41.2047	51.7291
0.81264	0.000297003		0.590542	0.0191125		41.2128	51.6392
0.82083	0.000374155		0.598732	0.0189421		41.221	51.7052
0.829019	0.00030682		0.606921	0.0180737		41.2292	52.3518
0.837209	0.000239484		0.615111	0.0174763		41.2374	52.4678
0.845399	7.98561e-05		0.623301	0.0174416		41.2456	52.4852
0.853589	7.00357e-05		0.631491	0.017407		41.2538	52.5025
0.861778	6.02153e-05		0.63968	0.0171776		41.262	52.6377
0.869968	9.70414e-05		0.64787	0.0160195		41.2702	52.7197
0.878158	0.000114		0.65606	0.0123149		41.2784	52.6139
0.886348	0.00011184		0.66425	0.0117856		41.2866	52.6776
0.894538	0.000109681		0.67244	0.0137783		41.2947	52.4193
0.902727	0.000101315		0.680629	0.0148525		41.3029	52.8823
0.910917	5.71477e-05		0.688819	0.0175135		41.3111	52.4923
0.919107	4.83619e-05		0.697009	0.0175215		41.3193	52.0924
0.927297	3.9576e-05		0.705199	0.0171747		41.3275	52.2697
0.935486	-6.80868e-05		0.713388	0.0168279		41.3357	52.1261
0.943676	-0.00017575		0.721578	0.0151172		41.3439	52.2212
0.951866	-0.000138344		0.729768	0.0142407		41.3521	52.1995
0.960056	-0.000137768		0.737958	0.0174793		41.3603	52.0503
0.968246	-0.000138508		0.746148	0.0190231		41.3685	51.5905
0.976435	-0.000139249		0.754337	0.0193102		41.3766	53.039
0.984625	-6.48363e-05		0.762527	0.0194066		41.3848	53.8454
0.992815	-3.41886e-05		0.770717	0.0192449		41.393	53.9557
1.001	-1.88983e-05		0.778907	0.0190832		41.4012	54.1496
1.00919	-1.28811e-05		0.787097	0.0165412		41.4094	54.2151
1.01738	-6.86387e-06		0.795286	0.0130458		41.4176	53.0853
1.02557	6.10131e-06		0.803476	0.0156663		41.4258	53.4636
1.03376	1.26183e-05		0.811666	0.0184123		41.434	53.4602
1.04195	3.56541e-05		0.819856	0.019048		41.4422	53.6099
1.05014	4.3911e-05		0.828045	0.0191795		41.4503	53.5666
1.05833	5.21679e-05		0.836235	0.0192192		41.4585	53.4421
1.06652	0.000223377		0.844425	0.0191838		41.4667	53.2444
1.07471	0.000327319		0.852615	0.0191484		41.4749	53.4351
1.0829	0.000325945		0.860805	0.0189208		41.4831	53.4067
1.09109	0.000324572		0.868994	0.0184303		41.4913	53.2329
1.09928	0.000291859		0.877184	0.0168311		41.4995	53.4598
1.10747	0.000192804		0.885374	0.0170263		41.5077	52.958
1.11566	9.37489e-05		0.893564	0.0170492		41.5159	53.3093
1.12385	-1.10061e-05		0.901754	0.016831		41.5241	53.352
1.13204	7.26675e-05		0.909943	0.0166127		41.5322	53.3898
1.14023	0.000116583		0.918133	0.0141565		41.5404	53.5638
1.14842	0.000111279		0.926323	0.018586		41.5486	52.5639
1.15661	0.000105974		0.934513	0.0196558		41.5568	52.7313
1.1648	7.94731e-05		0.942702	0.0208115		41.565	52.609
1.17299	-7.62494e-05		0.950892	0.0211603		41.5732	52.4989
1.18118	-3.51462e-05		0.959082	0.02107		41.5814	52.4613
1.18937	5.57226e-05		0.967272	0.0209797		41.5896	51.9668
1.19756	0.000140512		0.975462	0.0207292		41.5978	52.6486
1.20575	0.000186907		0.983651	0.0165688		41.606	52.9109
1.21394	0.000209756		0.991841	0.0155399		41.6141	52.6256
1.22213	0.000206759		1.00003	0.0168855		41.6223	52.7208
1.23032	0.000203762		1.00822	0.0166903		41.6305	52.547
1.23851	2.55243e-05		1.01641	0.0164951		41.6387	54.4699
1.2467	-0.000122552		1.0246	0.0158746		41.6469	55.3056
1.25489	0.00013955		1.03279	0.014601		41.6551	54.877
1.26308	0.000157782		1.04098	0.015065		41.6633	54.8037
1.27127	0.000176014		1.04917	0.0161709		41.6715	54.6855
1.27946	0.000191486		1.05736	0.0172037		41.6797	54.036
1.28765	0.000206959		1.06555	0.0173622		41.6879	52.6015
1.29584	0.000361472		1.07374	0.0173727		41.696	53.3345
1.30403	0.000379523		1.08193	0.0165419		41.7042	53.713
1.31222	0.000386063		1.09012	0.0157111		41.7124	53.9757
1.32041	0.000331993		1.09831	0.0171729		41.7206	53.8537
1.3286	0.000277923		1.1065	0.0178853		41.7288	52.9817
1.33679	4.53354e-05		1.11469	0.0180316		41.737	52.669
1.34498	0.000102017		1.12288	0.0178531		41.7452	53.5997
1.35317	0.000107246		1.13107	0.0176746		41.7534	53.7133
1.36136	0.000104541		1.13926	0.017267		41.7616	53.5101
1.36955	0.000101837		1.14745	0.015379		41.7698	53.4064
1.37773	-5.59277e-06		1.15564	0.0153299		41.7779	53.1398
1.38592	-5.00212e-06		1.16383	0.0152807		41.7861	52.1001
1.39411	-4.99106e-06		1.17202	0.0145266		41.7943	52.38
1.4023	-4.98e-06		1.18021	0.0148884		41.8025	53.1956
1.41049	5.50725e-05		1.1884	0.015225		41.8107	52.5155
1.41868	6.49502e-05		1.19659	0.0153723		41.8189	52.4755
1.42687	7.48279e-05		1.20478	0.0152941		41.8271	52.8483
1.43506	9.00478e-05		1.21297	0.0152158		41.8353	53.916
1.44325	8.80389e-05		1.22116	0.0150391		41.8435	53.9132
1.45144	8.60299e-05		1.22934	0.0149051		41.8516	53.9883
1.45963	7.69072e-05		1.23753	0.0157302		41.8598	54.0026
1.46782	-8.16663e-05		1.24572	0.0165552		41.868	53.9148
1.47601	7.46248e-05		1.25391	0.0168671		41.8762	54.1417
1.4842	0.000127741		1.2621	0.017179		41.8844	53.6985
1.49239	0.000180858		1.27029	0.017137		41.8926	53.6765
1.50058	0.000226611		1.27848	0.0170949		41.9008	53.6408
1.50877	0.000325487		1.28667	0.0168909		41.909	53.6149
1.51696	0.000346025		1.29486	0.0164256		41.9172	53.5365
1.52515	0.000317288		1.30305	0.0147904		41.9254	53.4417
1.53334	0.00028855		1.31124	0.015338		41.9335	53.4542
1.54153	0.000222736		1.31943	0.0154192		41.9417	53.5788
1.54972	0.000135246		1.32762	0.0153387		41.9499	53.6415
1.55791	0.00013469		1.33581	0.0152582		41.9581	53.7386
1.5661	0.000134134		1.344	0.0150878		41.9663	53.7774
1.57429	0.000131965		1.35219	0.0137332		41.9745	53.6314
1.58248	0.000252291		1.36038	0.0108915		41.9827	53.5658
1.59067	0.000372617		1.36857	0.0126053		41.9909	53.4812
1.59886	0.000422481		1.37676	0.0149737		41.9991	53.0155
1.60705	0.000521901		1.38495	0.015278		42.0073	53.4351
1.61524	0.000732781		1.39314	0.015405		42.0154	53.7989
1.62343	0.000792533		1.40133	0.0154075		42.0236	53.6265
1.63162	0.000794426		1.40952	0.01541		42.0318	53.5944
1.63981	0.000787339		1.41771	0.0158681		42.04	53.6289
1.648	0.000780253		1.4259	0.0158994		42.0482	53.6597
1.65619	0.000516772		1.43409	0.0158476		42.0564	53.8623
1.66438	7.6224e-05		1.44228	0.0157957		42.0646	53.9146
1.67257	0.000215477		1.45047	0.0158376		42.0728	53.8112
1.68076	0.000325584		1.45866	0.0158575		42.081	54.0964
1.68895	0.000573168		1.46685	0.0158586		42.0892	54.139
1.69714	0.000629159		1.47504	0.0158596		42.0973	54.0289
1.70533	0.00068515		1.48323	0.0162432		42.1055	53.6812
1.71352	0.00083672		1.49142	0.0166268		42.1137	53.2081
1.72171	0.000929518		1.49961	0.0171151		42.1219	53.0662
1.7299	0.000939915		1.5078	0.0194364		42.1301	52.9549
1.73809	0.000935412		1.51599	0.0193959		42.1383	52.9866
1.74628	0.000930908		1.52418	0.0193554		42.1465	53.5264
1.75446	0.00124572		1.53237	0.0189277		42.1547	53.5885
1.76265	0.00124687		1.54056	0.0180112		42.1629	53.8283
1.77084	0.00124287		1.54875	0.0174159		42.1711	53.9543
1.77903	0.00123887		1.55694	0.0168206		42.1792	54.7744
1.78722	0.00121925		1.56513	0.0118014		42.1874	55.0935
1.79541	0.000987817		1.57332	0.035422		42.1956	54.9509
1.8036	0.00108328		1.58151	0.0440141		42.2038	54.8192
1.81179	0.00108507		1.5897	0.0350483		42.212	54.8378
1.81998	0.00107301		1.59789	0.0260826		42.2202	54.883
1.82817	0.00106094		1.60607	0.023353		42.2284	54.2349
1.83636	0.000742513		1.61426	0.0221237		42.2366	53.837
1.84455	0.000211173		1.62245	0.0208944		42.2448	52.8615
1.85274	0.000379794		1.63064	0.0203435		42.2529	52.5986
1.86093	0.000463884		1.63883	0.0196994		42.2611	53.1421
1.86912	0.000503182		1.64702	0.0190553		42.2693	54.0393
1.87731	0.000517083		1.65521	0.0163354		42.2775	54.0353
1.8855	0.000512186		1.6634	0.0175182		42.2857	54.0265
1.89369	0.000507288		1.67159	0.0180794		42.2939	54.5664
1.90188	0.00049629		1.67978	0.0182639		42.3021	54.885
1.91007	0.000362465		1.68797	0.0175801		42.3103	54.3642
1.91826	0.000687939		1.69616	0.0168964		42.3185	55.0139
1.92645	0.000728447		1.70435	0.0171044		42.3267	55.2954
1.93464	0.000726582		1.71254	0.0171864		42.3348	55.1058
1.94283	0.000724718		1.72073	0.0172683		42.343	55.0129
1.95102	0.000719865		1.72892	0.0178737		42.3512	54.9537
1.95921	0.000700022		1.73711	0.0179357		42.3594	54.9199
1.9674	0.000680179		1.7453	0.0178948		42.3676	54.861
1.97559	0.000638372		1.75349	0.0178538		42.3758	54.703
1.98378	0.000942087		1.76168	0.0175573		42.384	53.8198
1.99197	0.00101106		1.76987	0.0169556		42.3922	54.7569
2.00016	0.00100547		1.77806	0.0146861		42.4004	55.2318
2.00835	0.000999872		1.78625	0.0125792		42.4086	55.4505
2.01654	0.000962094		1.79444	0.0160114		42.4167	55.5667
2.02473	0.000884026		1.80263	0.0166923		42.4249	54.7486
2.03292	0.000805958		1.81082	0.0191955		42.4331	54.372
2.04111	0.00059001		1.81901	0.0432646		42.4413	53.9293
2.0493	0.000736894		1.8272	0.0522544		42.4495	53.665
2.05749	0.000810323		1.83539	0.0416302		42.4577	54.0683
2.06568	0.000816738		1.84358	0.031006		42.4659	54.1719
2.07387	0.000813644		1.85177	0.0180327		42.4741	54.1384
2.08206	0.000810549		1.85996	0.0185662		42.4823	54.1995
2.09025	0.000773188		1.86815	0.0185581		42.4905	54.3731
2.09844	0.000692957		1.87634	0.0185499		42.4986	53.4614
2.10663	0.000526986		1.88453	0.0184502		42.5068	53.6577
2.11482	0.000509273		1.89272	0.0159789		42.515	53.8516
2.12301	0.00037637		1.90091	0.0187276		42.5232	53.9268
2.1312	0.000243467		1.9091	0.0231484		42.5314	53.934
2.13938	0.000348607		1.91729	0.0234379		42.5396	53.8001
2.14757	0.000431058		1.92548	0.0235584		42.5478	53.8534
2.15576	0.000446135		1.93367	0.0220064		42.556	53.9558
2.16395	0.00335616		1.94186	0.0204543		42.5642	55.31
2.17214	0.00359778		1.95005	0.0211485		42.5724	55.1423
2.18033	0.00360945		1.95824	0.0212576		42.5805	55.0091
2.18852	0.00357659		1.96643	0.0212605		42.5887	54.8758
2.19671	0.00354372		1.97462	0.0199235		42.5969	54.7074
2.2049	0.00295666		1.98281	0.0185866		42.6051	54.4637
2.21309	0.0023696		1.99099	0.0192171		42.6133	54.5123
2.22128	0.00189981		1.99918	0.0193556		42.6215	54.4201
2.22947	0.00180057		2.00737	0.019494		42.6297	54.1231
2.23766	0.00170132		2.01556	0.019616		42.6379	53.8609
2.24585	0.00134972		2.02375	0.0195763		42.6461	54.6143
2.25404	0.00102888		2.03194	0.0195366		42.6542	55.0725
2.26223	0.000993885		2.04013	0.019438		42.6624	55.12
2.27042	0.000958887		2.04832	0.01822		42.6706	55.0226
2.27861	0.00081917		2.05651	0.0203307		42.6788	55.0709
2.2868	0.00103369		2.0647	0.0209794		42.687	54.1522
2.29499	0.000981811		2.07289	0.0224551		42.6952	54.9373
2.30318	0.000929929		2.08108	0.0226846		42.7034	54.8355
2.31137	0.000820233		2.08927	0.0227447		42.7116	54.8915
2.31956	0.000600514		2.09746	0.0228048		42.7198	54.8719
2.32775	0.00049316		2.10565	0.022729		42.728	55.2376
2.33594	0.000491639		2.11384	0.0226533		42.7361	54.6474
2.34413	0.000490118		2.12203	0.0224743		42.7443	54.3029
2.35232	0.000465877		2.13022	0.020009		42.7525	54.5638
2.36051	0.000404525		2.13841	0.0236293		42.7607	54.7281
2.3687	0.000395832		2.1466	0.0487247		42.7689	55.0622
2.37689	0.00038714		2.15479	0.0605709		42.7771	55.2194
2.38508	0.000228033		2.16298	0.0632225		42.7853	55.6496
2.39327	5.23316e-05		2.17117	0.0494745		42.7935	55.7226
2.40146	4.78989e-05		2.17936	0.0357264		42.8017	55.5136
2.40965	4.34661e-05		2.18755	0.0175077		42.8099	55.3237
2.41784	2.00961e-05		2.19574	0.0191792		42.818	55.2677
2.42603	-3.29189e-05		2.20393	0.0201691		42.8262	55.2186
2.43422	-0.000107199		2.21212	0.0205345		42.8344	55.2873
2.44241	-1.98729e-05		2.22031	0.0201962		42.8426	54.7704
2.4506	-1.5853e-05		2.2285	0.0198579		42.8508	54.8726
2.45879	-1.1833e-05		2.23669	0.0206641		42.859	56.372
2.46698	5.14885e-05		2.24488	0.0210445		42.8672	56.4686
2.47517	7.75119e-05		2.25307	0.0209259		42.8754	56.5493
2.48336	0.000103535		2.26126	0.0208072		42.8836	56.4592
2.49155	0.000192109		2.26945	0.0204679		42.8918	56.4283
2.49974	0.000280683		2.27764	0.0148978		42.8999	56.2585
2.50793	0.000451768		2.28583	0.0145044		42.9081	55.8847
2.51611	0.00049851		2.29402	0.0178313		42.9163	54.9243
2.5243	0.000507466		2.30221	0.0184172		42.9245	55.5178
2.53249	0.000510227		2.3104	0.0267034		42.9327	55.7051
2.54068	0.00050385		2.31859	0.056113		42.9409	55.1738
2.54887	0.000497473		2.32678	0.0504138		42.9491	55.0086
2.55706	0.000377204		2.33497	0.0447147		42.9573	54.9154
2.56525	-6.48836e-05		2.34316	0.0246202		42.9655	54.7877
2.57344	-5.67012e-05		2.35135	0.023023		42.9736	56.0821
2.58163	-5.53364e-05		2.35954	0.0217278		42.9818	56.4111
2.58982	-5.39717e-05		2.36772	0.0209846		42.99	55.9475
2.59801	-3.98448e-05		2.37591	0.0201844		42.9982	55.9279
2.6062	-2.71781e-05		2.3841	0.0196755		43.0064	55.7875
2.61439	8.14827e-05		2.39229	0.0203066		43.0146	55.6614
2.62258	0.000103288		2.40048	0.0221569		43.0228	55.5535
2.63077	0.000104782		2.40867	0.0223059		43.031	55.5666
2.63896	0.000103357		2.41686	0.0221536		43.0392	55.36
2.64715	0.000101931		2.42505	0.0220014		43.0474	55.9166
2.65534	-7.22746e-05		2.43324	0.0274996		43.0555	55.2899
2.66353	-0.000122225		2.44143	0.0300498		43.0637	55.2386
2.67172	4.51765e-05		2.44962	0.029892		43.0719	55.1806
2.67991	0.000124711		2.45781	0.0297342		43.0801	55.1915
2.6881	0.000281958		2.466	0.0287303		43.0883	55.2239
2.69629	0.000286026		2.47419	0.0246118		43.0965	55.3395
2.70448	0.000282965		2.48238	0.0223087		43.1047	55.387
2.71267	0.000279904		2.49057	0.0210887		43.1129	55.6043
2.72086	0.000257923		2.49876	0.0207608		43.1211	56.1363
2.72905	0.000266249		2.50695	0.020433		43.1293	56.317
2.73724	0.000274003		2.51514	0.0197684		43.1374	56.3055
2.74543	0.000253277		2.52333	0.0181855		43.1456	56.1712
2.75362	0.00023255		2.53152	0.0177101		43.1538	56.0863
2.76181	0.000133339		2.53971	0.0172346		43.162	55.9102
2.77	0.000150896		2.5479	0.0160648		43.1702	55.9379
2.77819	0.000241603		2.55609	0.0129359		43.1784	55.9442
2.78638	0.000249243		2.56428	0.0178701		43.1866	56.0151
2.79457	0.00025244		2.57247	0.0179009		43.1948	55.9618
2.80276	0.000247956		2.58066	0.0179055		43.203	56.0569
2.81095	0.000243471		2.58885	0.017329		43.2112	56.2683
2.81914	0.00021628		2.59704	0.0167524		43.2193	56.4394
2.82733	0.000129031		2.60523	0.0158295		43.2275	56.1127
2.83552	9.12656e-05		2.61342	0.0149067		43.2357	55.9623
2.84371	-1.80224e-05		2.62161	0.0127884		43.2439	55.9935
2.8519	-4.06236e-05		2.6298	0.0144621		43.2521	55.7036
2.86009	-0.000152445		2.63799	0.020568		43.2603	55.4034
2.86828	-0.0001838		2.64618	0.0208584		43.2685	54.8578
2.87647	-0.000198373		2.65437	0.0208197		43.2767	54.8367
2.88466	-0.000212945		2.66256	0.020781		43.2849	55.1709
2.89284	-0.000161876		2.67075	0.0199613		43.2931	55.8925
2.90103	-0.000144582		2.67894	0.018032		43.3012	56.326
2.90922	-0.000127288		2.68713	0.017879		43.3094	56.6308
2.91741	-0.000115735		2.69532	0.0192989		43.3176	56.758
2.9256	-0.000104182		2.70351	0.0200418		43.3258	56.8328
2.93379	-5.68281e-05		2.7117	0.0207846		43.334	56.7888
2.94198	0.000509126		2.71989	0.0215741		43.3422	56.3202
2.95017	0.000516312		2.72808	0.0210829		43.3504	55.7287
2.95836	0.000463465		2.73627	0.0205916		43.3586	55.7458
2.96655	0.000410618		2.74446	0.019532		43.3668	55.7238
2.97474	0.000301335		2.75264	0.0195405		43.3749	55.7019
2.98293	0.000219095		2.76083	0.0195344		43.3831	55.74
2.99112	0.000136855		2.76902	0.0195283		43.3913	55.7208
2.99931	0.000122943		2.77721	0.0193231		43.3995	55.6054
3.0075	0.000109031		2.7854	0.0192642		43.4077	56.0111
3.01569	5.4719e-05		2.79359	0.0192052		43.4159	55.9528
3.02388	-7.44336e-05		2.80178	0.0186876		43.4241	55.904
3.03207	-4.00343e-05		2.80997	0.0175589		43.4323	56.0154
3.04026	0.000504992		2.81816	0.0187028		43.4405	56.194
3.04845	0.000569138		2.82635	0.0197385		43.4487	56.345
3.05664	0.000571331		2.83454	0.0202214		43.4568	56.3686
3.06483	0.000570895		2.84273	0.0199921		43.465	56.1072
3.07302	0.00057046		2.85092	0.0197628		43.4732	56.0318
3.08121	0.000539751		2.85911	0.0191388		43.4814	55.9565
3.0894	0.000185245		2.8673	0.0186141		43.4896	56.7308
3.09759	0.000132073		2.87549	0.0192058		43.4978	56.0305
3.10578	7.89016e-05		2.88368	0.0194653		43.506	55.9338
3.11397	-6.95202e-05		2.89187	0.0195137		43.5142	55.9006
3.12216	0.000145343		2.90006	0.0195184		43.5224	55.8354
3.13035	0.000183784		2.90825	0.0195231		43.5306	55.9042
3.13854	0.000170273		2.91644	0.0206575		43.5387	56.2189
3.14673	0.000156763		2.92463	0.0211959		43.5469	56.5998
3.15492	0.000124842		2.93282	0.0210717		43.5551	56.9298
3.16311	3.16712e-05		2.94101	0.0209475		43.5633	57.727
3.1713	-6.14995e-05		2.9492	0.0205053		43.5715	57.962
3.17949	-0.000162451		2.95739	0.0218258		43.5797	56.7118
3.18768	-8.78778e-05		2.96558	0.0225999		43.5879	56.6127
3.19587	-5.84712e-05		2.97377	0.0227313		43.5961	56.556
3.20406	6.22406e-05		2.98196	0.0228626		43.6043	56.5187
3.21225	7.26179e-05		2.99015	0.0267441		43.6125	56.3112
3.22044	7.30635e-05		2.99834	0.026488		43.6206	56.0782
3.22863	7.3509e-05		3.00653	0.0262319		43.6288	56.5234
3.23682	0.000341571		3.01472	0.0241591		43.637	56.9124
3.24501	0.0020633		3.02291	0.0215286		43.6452	56.6672
3.2532	0.0028509		3.0311	0.0203662		43.6534	56.455
3.26139	0.00233221		3.03929	0.0225982		43.6616	56.3861
3.26958	0.00181352		3.04748	0.0243588		43.6698	56.3056
3.27776	0.000535709		3.05567	0.0244095		43.678	56.4814
3.28595	0.000334519		3.06386	0.0244315		43.6862	56.3811
3.29414	0.000292629		3.07205	0.0235733		43.6944	56.3795
3.30233	0.000250739		3.08024	0.0227151		43.7025	56.3778
3.31052	-1.08777e-05		3.08843	0.0211805		43.7107	56.083
3.31871	-0.000249819		3.09662	0.0213983		43.7189	56.771
3.3269	-0.000236904		3.10481	0.0214645		43.7271	56.7937
3.33509	5.39326e-05		3.113	0.0214887		43.7353	56.8189
3.34328	0.000143429		3.12119	0.0212631		43.7435	56.8967
3.35147	0.000156878		3.12937	0.0210375		43.7517	56.3167
3.35966	0.000157346		3.13756	0.0179094		43.7599	56.0948
3.36785	0.000155411		3.14575	0.0185114		43.7681	56.4884
3.37604	0.000153477		3.15394	0.0232402		43.7762	56.5307
3.38423	0.000149138		3.16213	0.0231679		43.7844	56.5337
3.39242	0.00012096		3.17032	0.0230957		43.7926	56.5087
3.40061	6.29812e-05		3.17851	0.0229189		43.8008	56.4115
3.4088	4.89451e-05		3.1867	0.0259207		43.809	56.3977
3.41699	3.49089e-05		3.19489	0.0262844		43.8172	56.3629
3.42518	-1.19939e-05		3.20308	0.0263628		43.8254	56.7695
3.43337	-0.000129392		3.21127	0.0260984		43.8336	56.9291
3.44156	-0.000121454		3.21946	0.0258339		43.8418	57.0319
3.44975	-0.000119472		3.22765	0.0250477		43.85	56.7282
3.45794	-0.000124729		3.23584	0.0244189		43.8581	56.7849
3.46613	-0.000129985		3.24403	0.0237901		43.8663	56.9009
3.47432	5.70512e-05		3.25222	0.0243319		43.8745	56.9444
3.48251	0.000133717		3.26041	0.0314558		43.8827	57.0184
3.4907	0.000210383		3.2686	0.0315268		43.8909	57.1378
3.49889	0.000253477		3.27679	0.0313755		43.8991	56.4504
3.50708	0.000260212		3.28498	0.0312242		43.9073	56.3987
3.51527	0.000215851		3.29317	0.0304527		43.9155	56.6738
3.52346	0.00017149		3.30136	0.0296425		43.9237	56.6885
3.53165	8.16756e-05		3.30955	0.0293164		43.9319	56.6565
3.53984	0.000170734		3.31774	0.0289903		43.94	56.6678
3.54803	0.000259792		3.32593	0.0282314		43.9482	56.9663
3.55622	0.000381164		3.33412	0.0265259		43.9564	56.9554
3.56441	0.000441309		3.34231	0.0276161		43.9646	56.9118
3.5726	0.000469463		3.3505	0.0313771		43.9728	56.8236
3.58079	0.000465367		3.35869	0.0327414		43.981	56.7918
3.58898	0.000461271		3.36688	0.0310302		43.9892	56.7571
3.59717	0.000443678		3.37507	0.029319		43.9974	56.653
3.60536	-8.51423e-05		3.38326	0.0252967		44.0056	57.1087
3.61355	-0.00013467		3.39145	0.0268536		44.0138	56.4298
3.62174	-0.000184198		3.39964	0.0271039		44.0219	56.4674
3.62993	-0.000261742		3.40783	0.0271286		44.0301	56.1853
3.63812	8.96749e-06		3.41602	0.0259044		44.0383	56.989
3.64631	0.000111658		3.42421	0.0246802		44.0465	57.3384
3.65449	0.000155399		3.4324	0.0235514		44.0547	57.4017
3.66268	0.000147847		3.44059	0.0249073		44.0629	57.3693
3.67087	0.000140294		3.44878	0.0253998		44.0711	57.1584
3.67906	0.000123122		3.45697	0.0258922		44.0793	56.9252
3.68725	0.000309201		3.46516	0.0309814		44.0875	56.4378
3.69544	0.000344546		3.47335	0.0334066		44.0957	56.6025
3.70363	0.000351102		3.48154	0.0343404		44.1038	56.4273
3.71182	0.000227114		3.48973	0.0337887		44.112	56.7782
3.72001	0.000103127		3.49792	0.033237		44.1202	56.9281
3.7282	0.000556297		3.5061	0.0317073		44.1284	56.9826
3.73639	0.000673703		3.51429	0.0316189		44.1366	56.8494
3.74458	0.00079111		3.52248	0.0315306		44.1448	56.6531
3.75277	0.000792826		3.53067	0.0310255		44.153	56.7147
3.76096	0.000766972		3.53886	0.0285884		44.1612	56.4713
3.76915	0.000741118		3.54705	0.0314999		44.1694	57.5305
3.77734	0.000689166		3.55524	0.0316237		44.1775	58.0396
3.78553	0.000682338		3.56343	0.0317476		44.1857	57.958
3.79372	0.000675511		3.57162	0.0347966		44.1939	57.8454
3.80191	0.000647727		3.57981	0.0351823		44.2021	57.727
3.8101	0.000538326		3.588	0.0431571		44.2103	57.6136
3.81829	0.000497201		3.59619	0.0453869		44.2185	56.9121
3.82648	0.00058131		3.60438	0.0398628		44.2267	56.7247
3.83467	0.000601089		3.61257	0.0343387		44.2349	56.5353
3.84286	0.000758818		3.62076	0.0338579		44.2431	57.0214
3.85105	0.000916548		3.62895	0.033377		44.2513	57.2041
3.85924	0.000986672		3.63714	0.031811		44.2594	57.1466
3.86743	0.0010722		3.64533	0.035629		44.2676	57.0958
3.87562	0.00129815		3.65352	0.037696		44.2758	56.8521
3.88381	0.00117826		3.66171	0.0379748		44.284	57.2572
3.892	0.00105836		3.6699	0.0382536		44.2922	57.3841
3.90019	0.000754722		3.67809	0.0386035		44.3004	57.4139
3.90838	0.000130485		3.68628	0.0956044		44.3086	57.2663
3.91657	0.000122217		3.69447	0.103202		44.3168	57.1648
3.92476	7.62245e-05		3.70266	0.0981636		44.325	57.9107
3.93295	3.02317e-05		3.71085	0.0931256		44.3332	58.1481
3.94114	-8.66086e-05		3.71904	0.0793031		44.3413	58.0956
3.94933	-4.08847e-05		3.72723	0.0513775		44.3495	58.0931
3.95752	-2.2191e-05		3.73542	0.0512211		44.3577	58.1461
3.96571	-3.49728e-06		3.74361	0.0510646		44.3659	57.7822
3.9739	3.39765e-05		3.7518	0.050244		44.3741	57.6907
3.98209	4.27924e-05		3.75999	0.0449372		44.3823	57.5916
3.99028	5.16083e-05		3.76818	0.0447446		44.3905	57.5617
3.99847	0.000113979		3.77637	0.044552		44.3987	57.5604
4.00666	0.000119941		3.78456	0.0417844		44.4069	58.3003
4.01485	0.000125903		3.79275	0.0418764		44.4151	57.8706
4.02304	0.0004994		3.80094	0.0419176		44.4232	57.5643
4.03123	0.000565742		3.80913	0.0419587		44.4314	57.4688
4.03941	0.000558173		3.81732	0.0431276		44.4396	57.5956
4.0476	0.000550603		3.82551	0.0458297		44.4478	57.806
4.05579	0.000528251		3.8337	0.0461542		44.456	57.8275
4.06398	0.000385923		3.84189	0.0461216		44.4642	57.9863
4.07217	8.89751e-05		3.85008	0.0460889		44.4724	57.9832
4.08036	8.4408e-06		3.85827	0.0451015		44.4806	57.9523
4.08855	7.32701e-06		3.86646	0.043125		44.4888	57.7231
4.09674	6.21323e-06		3.87465	0.04908		44.4969	57.1807
4.10493	1.60615e-05		3.88284	0.0496516		44.5051	57.5356
4.11312	2.59097e-05		3.89102	0.0494003		44.5133	57.7932
4.12131	0.00010771		3.89921	0.049149		44.5215	57.8459
4.1295	0.000370549		3.9074	0.048547		44.5297	57.8386
4.13769	0.000486927		3.91559	0.0473295		44.5379	57.8434
4.14588	0.000542128		3.92378	0.0468466		44.5461	57.9853
4.15407	0.000556953		3.93197	0.0474559		44.5543	57.9357
4.16226	0.000535852		3.94016	0.0477068		44.5625	58.002
4.17045	0.00051475		3.94835	0.0478121		44.5707	58.1562
4.17864	0.000266674		3.95654	0.0477323		44.5788	58.1743
4.18683	0.000233244		3.96473	0.0476525		44.587	58.1877
4.19502	0.000199814		3.97292	0.0494818		44.5952	57.8893
4.20321	0.000112602		3.98111	0.0503646		44.6034	57.7639
4.2114	4.73315e-05		3.9893	0.0505677		44.6116	57.621
4.21959	0.000133438		3.99749	0.0507708		44.6198	57.4578
4.22778	0.000187304		4.00568	0.0516028		44.628	57.8725
4.23597	0.000167132		4.01387	0.052693		44.6362	58.1777
4.24416	0.00014696		4.02206	0.052696		44.6444	58.2696
4.25235	9.84373e-05		4.03025	0.0543994		44.6526	58.2798
4.26054	3.45405e-05		4.03844	0.0561571		44.6607	58.2411
4.26873	0.000321302		4.04663	0.0576076		44.6689	57.8356
4.27692	0.000386963		4.05482	0.0597598		44.6771	57.5475
4.28511	0.000452624		4.06301	0.0606884		44.6853	58.0762
4.2933	0.000655168		4.0712	0.0611412		44.6935	57.9031
4.30149	0.000746541		4.07939	0.0613376		44.7017	57.8901
4.30968	0.000739705		4.08758	0.0606333		44.7099	57.8048
4.31787	0.000732869		4.09577	0.059929		44.7181	57.8272
4.32606	0.000496104		4.10396	0.0573539		44.7263	58.2612
4.33425	0.000402078		4.11215	0.0574996		44.7345	58.3126
4.34244	0.000308052		4.12034	0.0575361		44.7426	58.2832
4.35063	6.30519e-05		4.12853	0.0575726		44.7508	58.0747
4.35882	-0.000121744		4.13672	0.0616458		44.759	57.5735
4.36701	-0.000128903		4.14491	0.0643467		44.7672	58.0353
4.3752	-7.04247e-05		4.1531	0.0646299		44.7754	58.0757
4.38339	2.1907e-05		4.16129	0.0649131		44.7836	58.1186
4.39158	3.76111e-05		4.16948	0.0642206		44.7918	58.1359
4.39977	4.64529e-05		4.17767	0.0635281		44.8	58.2589
4.40796	0.000231278		4.18586	0.0621183		44.8082	58.351
4.41614	0.000274349		4.19405	0.0592965		44.8164	58.4172
4.42433	0.000317421		4.20224	0.0608102		44.8245	58.3521
4.43252	0.000363721		4.21043	0.0627485		44.8327	58.2709
4.44071	0.000370949		4.21862	0.063206		44.8409	58.0877
4.4489	0.000312409		4.22681	0.0636634		44.8491	57.7489
4.45709	0.000253869		4.235	0.066418		44.8573	57.8994
4.46528	-8.24956e-06		4.24319	0.0677676		44.8655	57.9645
4.47347	6.72889e-05		4.25138	0.0680271		44.8737	57.7977
4.48166	0.000152286		4.25957	0.0682534		44.8819	57.7616
4.48985	0.000154117		4.26775	0.0682483		44.8901	57.9606
4.49804	0.000155947		4.27594	0.0682433		44.8982	58.0498
4.50623	0.000176384		4.28413	0.0681474		44.9064	58.0481
4.51442	0.000167148		4.29232	0.0683574		44.9146	58.0568
4.52261	0.000157913		4.30051	0.0686339		44.9228	58.3675
4.5308	0.00013653		4.3087	0.0689105		44.931	58.452
4.53899	0.000123714		4.31689	0.0711273		44.9392	58.4581
4.54718	0.000143353		4.32508	0.0731685		44.9474	58.4513
4.55537	0.000150377		4.33327	0.0731416		44.9556	58.6607
4.56356	0.000145762		4.34146	0.0731147		44.9638	58.6435
4.57175	0.000141147		4.34965	0.0730394		44.972	58.5388
4.57994	5.31972e-05		4.35784	0.0728842		44.9801	58.552
4.58813	0.000108603		4.36603	0.0725692		44.9883	58.7279
4.59632	0.00011827		4.37422	0.0711647		44.9965	58.5119
4.60451	0.000122853		4.38241	0.0714344		45.0047	58.5004
4.6127	8.99556e-05		4.3906	0.0730299		45.0129	58.4603
4.62089	5.70579e-05		4.39879	0.0743402		45.0211	58.3634
4.62908	-9.651e-05		4.40698	0.0748616		45.0293	58.1303
4.63727	0.000108851		4.41517	0.0749744		45.0375	58.3118
4.64546	0.000142547		4.42336	0.0749733		45.0457	58.3567
4.65365	0.000156931		4.43155	0.0749723		45.0539	58.1773
4.66184	0.000171316		4.43974	0.0762651		45.062	58.5392
4.67003	0.000190692		4.44793	0.0803119		45.0702	58.731
4.67822	0.000191779		4.45612	0.0807917		45.0784	58.8101
4.68641	0.000191785		4.46431	0.0807647		45.0866	58.8805
4.6946	0.000191791		4.4725	0.0807378		45.0948	59.11
4.70279	0.000187601		4.48069	0.0758877		45.103	58.5089
4.71098	5.54089e-05		4.48888	0.0742832		45.1112	58.4929
4.71917	-3.75905e-05		4.49707	0.0760673		45.1194	58.5386
4.72736	-9.30635e-05		4.50526	0.0764446		45.1276	58.4703
4.73555	-5.46369e-05		4.51345	0.0768219		45.1358	58.6774
4.74374	-4.71645e-05		4.52164	0.0812156		45.1439	59.0667
4.75193	-4.37449e-05		4.52983	0.0833762		45.1521	58.9371
4.76012	-4.03253e-05		4.53802	0.0844221		45.1603	58.8608
4.76831	-1.82948e-05		4.54621	0.0845062		45.1685	59.0437
4.7765	-1.76755e-05		4.5544	0.0844007		45.1767	58.9204
4.78469	-1.7396e-05		4.56259	0.0842952		45.1849	58.8272
4.79287	-1.71165e-05		4.57078	0.0840843		45.1931	58.7742
4.80106	2.2331e-05		4.57897	0.0827951		45.2013	58.7271
4.80925	2.14851e-05		4.58716	0.0842606		45.2095	58.8347
4.81744	2.06393e-05		4.59535	0.0848262		45.2177	58.795
4.82563	1.891e-05		4.60354	0.0856005		45.2258	58.8348
4.83382	3.03321e-05		4.61173	0.0870361		45.234	58.9567
4.84201	2.79827e-05		4.61992	0.0875214		45.2422	59.0133
4.8502	2.56332e-05		4.62811	0.0874198		45.2504	59.0374
4.85839	-1.37657e-05		4.6363	0.0873183		45.2586	59.0559
4.86658	4.64991e-05		4.64449	0.0869791		45.2668	58.7557
4.87477	9.60166e-05		4.65267	0.0864691		45.275	59.0313
4.88296	0.000151527		4.66086	0.0897067		45.2832	59.1121
4.89115	0.000176824		4.66905	0.0902051		45.2914	59.1898
4.89934	0.000189367		4.67724	0.0903391		45.2995	59.351
4.90753	0.000185441		4.68543	0.0904731		45.3077	59.3673
4.91572	0.000181516		4.69362	0.0909162		45.3159	59.2352
4.92391	4.38499e-05		4.70181	0.0933436		45.3241	59.0705
4.9321	5.38935e-05		4.71	0.0935487		45.3323	58.924
4.94029	5.55062e-05		4.71819	0.0935004		45.3405	58.933
4.94848	5.28588e-05		4.72638	0.0934522		45.3487	58.9018
4.95667	5.02114e-05		4.73457	0.0933255		45.3569	58.8395
4.96486	4.42361e-05		4.74276	0.0930686		45.3651	58.8681
4.97305	3.20708e-05		4.75095	0.0925512		45.3733	58.8349
4.98124	-2.86574e-06		4.75914	0.0911595		45.3814	58.7726
4.98943	2.27717e-05		4.76733	0.0901475		45.3896	58.8703
4.99762	3.38437e-05		4.77552	0.0891355		45.3978	58.9826
5.00581	4.49157e-05		4.78371	0.0929277		45.406	58.9671
5.014	6.21836e-05		4.7919	0.0955637		45.4142	59.163
5.02219	5.83357e-05		4.80009	0.0960913		45.4224	59.2179
5.03038	5.44878e-05		4.80828	0.096233		45.4306	59.2982
5.03857	4.21721e-05		4.81647	0.0959067		45.4388	59.6336
5.04676	-3.48726e-06		4.82466	0.0955803		45.447	59.5458
5.05495	6.65318e-05		4.83285	0.0954303		45.4552	59.4727
5.06314	7.25653e-05		4.84104	0.0970798		45.4633	59.3909
5.07133	7.49497e-05		4.84923	0.0973606		45.4715	59.595
5.07952	7.32445e-05		4.85742	0.0973915		45.4797	59.5859
5.08771	7.15393e-05		4.86561	0.097355		45.4879	59.5796
5.0959	4.98988e-05		4.8738	0.0973186		45.4961	59.5974
5.10409	2.82582e-05		4.88199	0.0972448		45.5043	59.586
5.11228	-2.0485e-05		4.89018	0.0969432		45.5125	59.3412
5.12047	8.31015e-05		4.89837	0.101311		45.5207	59.2204
5.12866	0.000123114		4.90656	0.102444		45.5289	59.2755
5.13685	0.000163126		4.91475	0.103578		45.5371	59.3778
5.14504	0.000226886		4.92294	0.104343		45.5452	59.359
5.15323	0.000257937		4.93113	0.105343		45.5534	59.3751
5.16142	0.000254929		4.93932	0.10572		45.5616	59.3961
5.16961	0.000251922		4.94751	0.105813		45.5698	59.4839
5.17779	0.000238141		4.9557	0.105834		45.578	59.4594
5.18598	0.000315462		4.96389	0.105856		45.5862	59.5045
5.19417	0.000311803		4.97208	0.106314		45.5944	59.6117
5.20236	0.000308144		4.98027	0.106771		45.6026	59.6204
5.21055	0.000297318		4.98846	0.107192		45.6108	59.3864
5.21874	9.00257e-05		4.99665	0.107626		45.619	59.4636
5.22693	-2.25071e-05		5.00484	0.107643		45.6271	59.5261
5.23512	8.43738e-05		5.01303	0.107584		45.6353	59.4527
5.24331	0.000194376		5.02122	0.107525		45.6435	59.439
5.2515	0.000313827		5.0294	0.106531		45.6517	59.4221
5.25969	0.000340295		5.03759	0.105326		45.6599	59.4629
5.26788	0.000312176		5.04578	0.107595		45.6681	59.4228
5.27607	0.000284057		5.05397	0.11044		45.6763	59.7516
5.28426	0.0002165		5.06216	0.110682		45.6845	59.4152
5.29245	7.42592e-05		5.07035	0.110798		45.6927	59.0416
5.30064	8.23595e-06		5.07854	0.110914		45.7008	59.2079
5.30883	-5.77873e-05		5.08673	0.111207		45.709	59.1951
5.31702	-9.0919e-05		5.09492	0.111266		45.7172	59.1291
5.32521	6.93058e-06		5.10311	0.111057		45.7254	59.0408
5.3334	2.3444e-05		5.1113	0.110847		45.7336	59.2191
5.34159	2.82075e-05		5.11949	0.110406		45.7418	59.743
5.34978	3.2971e-05		5.12768	0.109504		45.75	59.7445
5.35797	3.3896e-05		5.13587	0.107664		45.7582	59.6699
5.36616	3.12706e-05		5.14406	0.111539		45.7664	59.6689
5.37435	2.86452e-05		5.15225	0.113363		45.7746	59.7979
5.38254	-0.00016197		5.16044	0.115188		45.7827	59.6072
5.39073	9.94927e-06		5.16863	0.117075		45.7909	59.5367
5.39892	2.88677e-05		5.17682	0.119256		45.7991	59.3507
5.40711	3.32222e-05		5.18501	0.119785		45.8073	59.399
5.4153	3.75768e-05		5.1932	0.119854		45.8155	59.4352
5.42349	4.3803e-05		5.20139	0.119844		45.8237	59.4005
5.43168	7.02829e-05		5.20958	0.119834		45.8319	59.3514
5.43987	6.03742e-05		5.21777	0.119646		45.8401	59.0521
5.44806	5.04655e-05		5.22596	0.119536		45.8483	60.1288
5.45625	2.48543e-05		5.23415	0.119427		45.8565	59.6522
5.46444	0.000113506		5.24234	0.119206		45.8646	59.6859
5.47263	0.000113321		5.25053	0.117333		45.8728	59.7322
5.48082	0.000113136		5.25872	0.116921		45.881	59.8858
5.48901	0.000111568		5.26691	0.120528		45.8892	60.047
5.4972	0.000107829		5.2751	0.122111		45.8974	60.2548
5.50539	-5.55974e-06		5.28329	0.122898		45.9056	60.0453
5.51358	-8.98066e-06		5.29148	0.123231		45.9138	60.146
5.52177	-4.32061e-05		5.29967	0.122964		45.922	60.1524
5.52996	9.79343e-05		5.30786	0.122696		45.9302	60.0238
5.53815	0.000106858		5.31605	0.122459		45.9384	60.0931
5.54634	0.000107611		5.32424	0.122222		45.9465	59.9181
5.55452	0.000248748		5.33243	0.121713		45.9547	59.8611
5.56271	0.000404795		5.34062	0.121462		45.9629	59.922
5.5709	0.000487599		5.34881	0.12257		45.9711	59.9946
5.57909	0.000497487		5.357	0.123099		45.9793	60.0782
5.58728	0.000414247		5.36519	0.123265		45.9875	60.0977
5.59547	0.000331007		5.37338	0.12343		45.9957	59.809
5.60366	-4.19361e-05		5.38157	0.12453		46.0039	59.8612
5.61185	-0.000273381		5.38976	0.125073		46.0121	59.8848
5.62004	-0.000258704		5.39795	0.123999		46.0202	59.919
5.62823	-0.000221128		5.40613	0.122925		46.0284	60.3664
5.63642	-0.000183551		5.41432	0.1206		46.0366	60.3737
5.64461	-6.87434e-05		5.42251	0.125968		46.0448	60.4377
5.6528	-5.72667e-05		5.4307	0.132443		46.053	60.2465
5.66099	-5.79626e-05		5.43889	0.134263		46.0612	60.0004
5.66918	-5.86584e-05		5.44708	0.134335		46.0694	59.7083
5.67737	-9.28528e-05		5.45527	0.133707		46.0776	60.2728
5.68556	-0.000187846		5.46346	0.133079		46.0858	60.3779
5.69375	-0.000268627		5.47165	0.131811		46.094	60.5621
5.70194	-8.38086e-05		5.47984	0.131288		46.1021	60.4979
5.71013	-4.7383e-05		5.48803	0.131292		46.1103	60.4712
5.71832	-5.0565e-05		5.49622	0.131291		46.1185	60.4696
5.72651	-5.37469e-05		5.50441	0.13129		46.1267	60.2029
5.7347	-7.18705e-05		5.5126	0.131573		46.1349	60.2443
5.74289	-0.000194368		5.52079	0.131213		46.1431	60.1521
5.75108	6.00749e-05		5.52898	0.130852		46.1513	60.1634
5.75927	8.23787e-05		5.53717	0.129995		46.1595	60.2251
5.76746	8.48931e-05		5.54536	0.128269		46.1677	60.3823
5.77565	8.37812e-05		5.55355	0.12647		46.1759	60.2488
5.78384	8.26694e-05		5.56174	0.125884		46.184	60.3924
5.79203	-0.000118467		5.56993	0.126222		46.1922	60.453
5.80022	-0.000139544		5.57812	0.130936		46.2004	60.4357
5.80841	-0.000100704		5.58631	0.131716		46.2086	60.4344
5.8166	7.57315e-05		5.5945	0.132082		46.2168	60.4281
5.82479	8.85159e-05		5.60269	0.132233		46.225	60.0334
5.83298	9.30837e-05		5.61088	0.132174		46.2332	59.9366
5.84117	8.72802e-05		5.61907	0.132115		46.2414	59.92
5.84936	8.14767e-05		5.62726	0.131954		46.2496	60.1543
5.85755	-1.75615e-05		5.63545	0.129822		46.2578	60.1647
5.86574	-0.000141447		5.64364	0.131875		46.2659	60.119
5.87393	-6.76223e-05		5.65183	0.13289		46.2741	60.0563
5.88212	-6.3382e-05		5.66002	0.133313		46.2823	60.2664
5.89031	-6.76809e-05		5.66821	0.133736		46.2905	60.7677
5.8985	-7.19798e-05		5.6764	0.137093		46.2987	60.8048
5.90669	-8.15774e-05		5.68459	0.137662		46.3069	60.8196
5.91488	0.000151527		5.69278	0.137686		46.3151	60.69
5.92307	0.000168953		5.70097	0.137603		46.3233	60.6864
5.93125	0.000177486		5.70916	0.13752		46.3315	60.6139
5.93944	0.000144409		5.71735	0.133997		46.3397	60.5599
5.94763	0.000111332		5.72554	0.138025		46.3478	60.5623
5.95582	4.46499e-05		5.73373	0.140239		46.356	60.5991
5.96401	0.000200552		5.74192	0.140714		46.3642	60.6675
5.9722	0.000270123		5.75011	0.140791		46.3724	60.8212
5.98039	0.000273095		5.7583	0.140806		46.3806	60.6772
5.98858	0.00027367		5.76649	0.140821		46.3888	60.324
5.99677	0.000181219		5.77468	0.140992		46.397	60.2362
6.00496	8.87675e-05		5.78287	0.140907		46.4052	60.1737
6.01315	6.52899e-05		5.79105	0.140823		46.4134	60.0558
6.02134	-0.000151298		5.79924	0.140634		46.4215	60.2687
6.02953	-0.000152384		5.80743	0.141936		46.4297	59.5008
6.03772	-7.05467e-05		5.81562	0.142554		46.4379	60.0734
6.04591	-5.7377e-05		5.82381	0.142712		46.4461	60.6841
6.0541	-5.33883e-05		5.832	0.141991		46.4543	60.8515
6.06229	-6.13944e-05		5.84019	0.14127		46.4625	60.9233
6.07048	-6.94005e-05		5.84838	0.142402		46.4707	61.0105
6.07867	-0.000228111		5.85657	0.144167		46.4789	60.9067
6.08686	-0.000342542		5.86476	0.145313		46.4871	61.0554
6.09505	-0.000346259		5.87295	0.145842		46.4953	61.4693
6.10324	-0.000132653		5.88114	0.145395		46.5034	61.4149
6.11143	3.28043e-05		5.88933	0.144948		46.5116	61.4139
6.11962	0.000121287		5.89752	0.1439		46.5198	61.3109
6.12781	0.000165971		5.90571	0.144978		46.528	61.1034
6.136	0.000156947		5.9139	0.145154		46.5362	61.0789
6.14419	0.000147923		5.92209	0.145331		46.5444	61.2301
6.15238	0.000118124		5.93028	0.145617		46.5526	61.3722
6.16057	7.83025e-05		5.93847	0.145903		46.5608	61.8669
6.16876	6.56407e-05		5.94666	0.14638		46.569	62.5328
6.17695	5.29789e-05		5.95485	0.146524		46.5772	61.4835
6.18514	-3.80366e-05		5.96304	0.146669		46.5853	61.2056
6.19333	2.03137e-06		5.97123	0.149272		46.5935	61.2179
6.20152	5.42392e-06		5.97942	0.149374		46.6017	61.2435
6.20971	8.81646e-06		5.98761	0.149382		46.6099	61.1481
6.2179	5.38793e-05		5.9958	0.148907		46.6181	60.94
6.22609	8.0628e-05		6.00399	0.148432		46.6263	61.1307
6.23428	8.52293e-05		6.01218	0.144979		46.6345	61.1868
6.24247	8.56693e-05		6.02037	0.14615		46.6427	61.2311
6.25066	5.3223e-05		6.02856	0.146345		46.6509	61.339
6.25885	2.07768e-05		6.03675	0.14654		46.6591	61.1214
6.26704	6.19613e-05		6.04494	0.14957		46.6672	60.7017
6.27523	7.13406e-05		6.05313	0.150738		46.6754	60.5226
6.28342	5.78119e-05		6.06132	0.150822		46.6836	60.825
6.29161	4.42832e-05		6.06951	0.150861		46.6918	60.4585
6.2998	1.31995e-05		6.0777	0.149807		46.7	60.416
6.30799	1.65529e-05		6.08589	0.148754		46.7082	60.42
6.31617	3.47558e-06		6.09408	0.148441		46.7164	60.7042
6.32436	-9.60173e-06		6.10227	0.148129		46.7246	60.8936
6.33255	-6.96451e-05		6.11046	0.147293		46.7328	60.8365
6.34074	0.000198506		6.11865	0.147059		46.741	60.8037
6.34893	0.000222686		6.12684	0.146824		46.7491	60.7633
6.35712	0.00021234		6.13503	0.145969		46.7573	60.5172
6.36531	0.000201994		6.14322	0.148662		46.7655	60.5428
6.3735	0.000176169		6.15141	0.151035		46.7737	60.8719
6.38169	1.20741e-05		6.1596	0.151909		46.7819	60.8747
6.38988	-9.30782e-08		6.16778	0.152784		46.7901	60.9399
6.39807	-1.22603e-05		6.17597	0.153486		46.7983	60.9837
6.40626	-6.67758e-05		6.18416	0.153828		46.8065	60.984
6.41445	-4.32281e-05		6.19235	0.153957		46.8147	60.9939
6.42264	-3.28312e-05		6.20054	0.154086		46.8228	61.0078
6.43083	-4.04084e-05		6.20873	0.157546		46.831	61.0788
6.43902	-4.79856e-05		6.21692	0.158267		46.8392	61.1138
6.44721	-8.56472e-05		6.22511	0.155478		46.8474	61.1661
6.4554	-0.000123309		6.2333	0.152688		46.8556	61.3356
6.46359	-0.000132325		6.24149	0.151428		46.8638	61.2573
6.47178	6.19813e-05		6.24968	0.15376		46.872	60.6076
6.47997	9.75552e-05		6.25787	0.154247		46.8802	60.9048
6.48816	9.78907e-05		6.26606	0.154735		46.8884	61.1929
6.49635	9.16231e-05		6.27425	0.155599		46.8966	61.4257
6.50454	8.53556e-05		6.28244	0.155275		46.9047	61.5451
6.51273	7.73324e-05		6.29063	0.154951		46.9129	61.5606
6.52092	6.93092e-05		6.29882	0.15415		46.9211	61.5311
6.52911	6.22421e-05		6.30701	0.152502		46.9293	61.5834
6.5373	5.5175e-05		6.3152	0.15248		46.9375	61.6106
6.54549	2.88385e-05		6.32339	0.152458		46.9457	61.0392
6.55368	-1.8959e-05		6.33158	0.152359		46.9539	61.572
6.56187	-0.000116279		6.33977	0.150223		46.9621	61.4394
6.57006	-0.00015786		6.34796	0.14984		46.9703	61.4224
6.57825	-3.25244e-05		6.35615	0.149457		46.9785	61.3617
6.58644	-1.27509e-06		6.36434	0.148155		46.9866	61.1402
6.59463	1.08486e-05		6.37253	0.152877		46.9948	61.4977
6.60282	1.34094e-05		6.38072	0.154719		47.003	61.5186
6.61101	4.04706e-06		6.38891	0.155621		47.0112	61.6142
6.6192	-5.31529e-06		6.3971	0.155916		47.0194	61.6328
6.62739	-0.000115831		6.40529	0.154134		47.0276	61.6539
6.63558	-0.00012637		6.41348	0.152351		47.0358	61.6964
6.64377	-0.000245988		6.42167	0.151703		47.044	61.1674
6.65196	-0.000264941		6.42986	0.152584		47.0522	61.7127
6.66015	-4.34137e-05		6.43805	0.153016		47.0604	61.6994
6.66834	-3.75308e-05		6.44624	0.153078		47.0685	61.6218
6.67653	-3.59885e-05		6.45443	0.153009		47.0767	61.6926
6.68472	-3.44461e-05		6.46262	0.15294		47.0849	61.6433
6.6929	4.31775e-05		6.47081	0.152777		47.0931	61.5771
6.70109	5.25257e-05		6.479	0.151595		47.1013	61.3622
6.70928	4.98376e-05		6.48719	0.157338		47.1095	61.464
6.71747	4.71495e-05		6.49538	0.157788		47.1177	61.3732
6.72566	-0.000130325		6.50357	0.157978		47.1259	61.4426
6.73385	-0.000159186		6.51176	0.158168		47.1341	61.3701
6.74204	-8.55821e-05		6.51995	0.159853		47.1423	61.2981
6.75023	-1.19783e-05		6.52814	0.159972		47.1504	61.2568
6.75842	2.48582e-05		6.53633	0.159824		47.1586	61.2613
6.76661	4.08624e-05		6.54451	0.159675		47.1668	61.2332
6.7748	3.76736e-05		6.5527	0.158777		47.175	61.248
6.78299	3.44849e-05		6.56089	0.158412		47.1832	61.6718
6.79118	2.52629e-05		6.56908	0.158046		47.1914	61.7115
6.79937	-2.95984e-05		6.57727	0.157412		47.1996	61.7552
6.80756	-2.05236e-05		6.58546	0.15789		47.2078	61.7741
6.81575	-1.14488e-05		6.59365	0.15801		47.216	61.778
6.82394	-1.43349e-05		6.60184	0.157957		47.2241	61.759
6.83213	-1.72211e-05		6.61003	0.157904		47.2323	61.5522
6.84032	-2.48701e-05		6.61822	0.157375		47.2405	61.7398
6.84851	-6.3197e-05		6.62641	0.158025		47.2487	61.8339
6.8567	-4.3631e-05		6.6346	0.159649		47.2569	61.8341
6.86489	-3.44748e-05		6.64279	0.159999		47.2651	61.794
6.87308	-3.18293e-05		6.65098	0.16035		47.2733	61.7495
6.88127	-2.91838e-05		6.65917	0.162026		47.2815	61.7492
6.88946	0.000122262		6.66736	0.162375		47.2897	61.5561
6.89765	0.000241298		6.67555	0.162427		47.2979	61.4586
6.90584	0.000276723		6.68374	0.162434		47.306	61.462
6.91403	0.000204392		6.69193	0.16244		47.3142	61.431
6.92222	0.000132061		6.70012	0.162838		47.3224	61.362
6.93041	-2.80386e-05		6.70831	0.163035		47.3306	61.2631
6.9386	3.78013e-05		6.7165	0.16313		47.3388	61.7436
6.94679	4.18375e-05		6.72469	0.163164		47.347	61.9644
6.95498	4.34815e-05		6.73288	0.162555		47.3552	62.1609
6.96317	-2.42036e-05		6.74107	0.161946		47.3634	62.2627
6.97136	-9.18886e-05		6.74926	0.163873		47.3716	62.3322
6.97955	2.79037e-05		6.75745	0.165814		47.3798	62.368
6.98774	3.03063e-05		6.76564	0.166762		47.3879	62.9228
6.99593	5.9257e-06		6.77383	0.166774		47.3961	63.1853
7.00412	-1.84549e-05		6.78202	0.166769		47.4043	63.2298
7.01231	-6.84151e-05		6.79021	0.166763		47.4125	63.1658
7.0205	4.79614e-05		6.7984	0.166505		47.4207	63.0535
7.02869	0.000216902		6.80659	0.163692		47.4289	62.2494
7.03688	0.000250062		6.81478	0.162543		47.4371	62.2634
7.04507	0.000257773		6.82297	0.161393		47.4453	62.2489
7.05326	0.000265485		6.83116	0.160114		47.4535	62.3407
7.06145	0.000282517		6.83935	0.164897		47.4617	62.3135
7.06964	0.000289414		6.84754	0.165195		47.4698	61.8552
7.07782	0.000281734		6.85573	0.165221		47.478	61.7703
7.08601	0.000274054		6.86392	0.164904		47.4862	61.8048
7.0942	-5.65151e-05		6.87211	0.164587		47.4944	61.8569
7.10239	0.000102065		6.8803	0.163102		47.5026	61.8724
7.11058	0.000157171		6.88849	0.164081		47.5108	61.8878
7.11877	0.000175451		6.89668	0.16413		47.519	61.8805
7.12696	0.000147135		6.90487	0.164139		47.5272	61.8875
7.13515	0.000118819		6.91306	0.164148		47.5354	61.8945
7.14334	8.76043e-05		6.92125	0.166184		47.5435	62.4418
7.15153	5.63892e-05		6.92943	0.167051		47.5517	62.8368
7.15972	-7.48351e-05		6.93762	0.167154		47.5599	62.9508
7.16791	-7.78431e-05		6.94581	0.167256		47.5681	62.8241
7.1761	-8.08511e-05		6.954	0.167856		47.5763	62.8076
7.18429	-0.000172648		6.96219	0.167816		47.5845	62.75
7.19248	-0.000187024		6.97038	0.167777		47.5927	62.2474
7.20067	-0.000201399		6.97857	0.165978		47.6009	62.1841
7.20886	-0.000241013		6.98676	0.164585		47.6091	62.1372
7.21705	-0.00032214		6.99495	0.16939		47.6173	62.1372
7.22524	-0.000128387		7.00314	0.170025		47.6254	62.1139
7.23343	-3.17528e-05		7.01133	0.16971		47.6336	62.0185
7.24162	-4.4423e-05		7.01952	0.169395		47.6418	62.0373
7.24981	-5.70932e-05		7.02771	0.168752		47.65	62.0342
7.258	-0.000122731		7.0359	0.16614		47.6582	62.0364
7.26619	-0.000143335		7.04409	0.167161		47.6664	62.005
7.27438	-0.000109324		7.05228	0.16832		47.6746	62.051
7.28257	-9.93002e-05		7.06047	0.168841		47.6828	62.2616
7.29076	-8.92768e-05		7.06866	0.168924		47.691	62.3376
7.29895	-1.18423e-05		7.07685	0.168913		47.6992	62.3183
7.30714	-5.60594e-06		7.08504	0.168902		47.7073	62.3709
7.31533	-2.56852e-06		7.09323	0.168799		47.7155	62.493
7.32352	-2.14655e-06		7.10142	0.168291		47.7237	62.5919
7.33171	-1.72458e-06		7.10961	0.16648		47.7319	62.3668
7.3399	3.69547e-07		7.1178	0.168456		47.7401	62.3836
7.34809	5.91634e-07		7.12599	0.170532		47.7483	62.4279
7.35628	-1.26258e-05		7.13418	0.170892		47.7565	62.3863
7.36447	-2.58432e-05		7.14237	0.170896		47.7647	62.3853
7.37266	0.000144917		7.15056	0.170847		47.7729	63.163
7.38085	0.000710493		7.15875	0.170797		47.7811	63.0412
7.38904	0.000711769		7.16694	0.17411		47.7892	62.9007
7.39723	0.000712336		7.17513	0.174252		47.7974	62.5207
7.40542	0.000591759		7.18332	0.174208		47.8056	62.5074
7.41361	0.000471183		7.19151	0.174165		47.8138	62.565
7.4218	0.000167909		7.1997	0.17368		47.822	62.602
7.42999	0.000199089		7.20789	0.173118		47.8302	62.5899
7.43818	0.000208848		7.21608	0.17056		47.8384	62.6063
7.44637	0.00019051		7.22427	0.167217		47.8466	62.5951
7.45455	0.000172171		7.23246	0.168491		47.8548	62.6463
7.46274	-8.58929e-05		7.24065	0.169847		47.863	62.5849
7.47093	-0.000167979		7.24884	0.171943		47.8711	62.5328
7.47912	-7.19838e-06		7.25703	0.17201		47.8793	62.6053
7.48731	1.3645e-05		7.26522	0.172018		47.8875	62.7194
7.4955	5.39696e-06		7.27341	0.171673		47.8957	62.7446
7.50369	-2.85108e-06		7.2816	0.171328		47.9039	62.7373
7.51188	-0.000103017		7.28979	0.171165		47.9121	62.7935
7.52007	-0.000122669		7.29798	0.171002		47.9203	62.5092
7.52826	-0.000142321		7.30616	0.170517		47.9285	62.362
7.53645	-0.000221282		7.31435	0.168248		47.9367	62.2596
7.54464	-0.000213361		7.32254	0.170396		47.9448	62.2313
7.55283	-9.26576e-05		7.33073	0.171165		47.953	62.1954
7.56102	-8.96414e-05		7.33892	0.170847		47.9612	62.3978
7.56921	-8.66251e-05		7.34711	0.170528		47.9694	62.6073
7.5774	-2.24207e-05		7.3553	0.16766		47.9776	62.7872
7.58559	-1.21974e-05		7.36349	0.162385		47.9858	62.8628
7.59378	-1.10347e-05		7.37168	0.163232		47.994	62.9959
7.60197	-5.61754e-05		7.37987	0.172012		48.0022	63.0036
7.61016	-0.000101316		7.38806	0.172017		48.0104	63.2681
7.61835	7.05727e-05		7.39625	0.171981		48.0186	62.7425
7.62654	8.4699e-05		7.40444	0.171945		48.0267	62.6814
7.63473	8.37509e-05		7.41263	0.171257		48.0349	62.7268
7.64292	8.28028e-05		7.42082	0.169796		48.0431	62.772
7.65111	8.07694e-05		7.42901	0.171166		48.0513	62.8219
7.6593	-0.000130142		7.4372	0.171829		48.0595	62.8514
7.66749	-0.00013792		7.44539	0.171949		48.0677	62.8618
7.67568	4.35264e-05		7.45358	0.172		48.0759	62.9202
7.68387	0.000133885		7.46177	0.169488		48.0841	63.0887
7.69206	0.000100862		7.46996	0.166976		48.0923	62.9316
7.70025	6.78398e-05		7.47815	0.166904		48.1005	62.9693
7.70844	-1.47178e-05		7.48634	0.166833		48.1086	62.9534
7.71663	-5.1698e-05		7.49453	0.164777		48.1168	62.9172
7.72482	-7.03167e-05		7.50272	0.16691		48.125	62.8872
7.73301	-8.74692e-05		7.51091	0.167193		48.1332	62.7786
7.7412	-0.000104622		7.5191	0.16717		48.1414	62.7745
7.74939	-0.000156725		7.52729	0.167147		48.1496	62.9005
7.75758	-8.92095e-05		7.53548	0.167016		48.1578	62.9592
7.76577	-8.78256e-05		7.54367	0.162675		48.166	62.9706
7.77396	-8.9134e-05		7.55186	0.164558		48.1742	63.4063
7.78215	-9.04425e-05		7.56005	0.165613		48.1824	63.4532
7.79034	-0.000121158		7.56824	0.165666		48.1905	63.1254
7.79853	-0.000151873		7.57643	0.165535		48.1987	63.1228
7.80672	-0.000215884		7.58462	0.165405		48.2069	63.1382
7.81491	-0.000246044		7.59281	0.163163		48.2151	63.0979
7.8231	-0.000174882		7.601	0.163611		48.2233	63.0292
7.83128	-0.000160242		7.60919	0.163705		48.2315	63.1773
7.83947	-0.000160771		7.61738	0.163798		48.2397	63.2768
7.84766	-0.000161301		7.62557	0.164443		48.2479	63.2864
7.85585	-0.000168033		7.63376	0.16453		48.2561	63.2974
7.86404	-0.000122472		7.64195	0.164053		48.2643	63.3784
7.87223	-0.000118437		7.65014	0.163575		48.2724	63.3936
7.88042	-0.000120949		7.65833	0.161449		48.2806	63.4169
7.88861	-0.000123461		7.66652	0.16119		48.2888	63.4786
7.8968	-0.000148837		7.67471	0.161168		48.297	63.4311
7.90499	-0.000201917		7.6829	0.161146		48.3052	63.3851
7.91318	-0.000115643		7.69108	0.160633		48.3134	63.1673
7.92137	8.87126e-05		7.69927	0.159552		48.3216	63.122
7.92956	0.000293068		7.70746	0.157871		48.3298	63.1231
7.93775	0.000294934		7.71565	0.157211		48.338	63.0639
7.94594	0.000292835		7.72384	0.156551		48.3461	63.0793
7.95413	0.000290736		7.73203	0.155217		48.3543	63.1061
7.96232	0.000154956		7.74022	0.156029		48.3625	63.1304
7.97051	-0.000122312		7.74841	0.157928		48.3707	63.1538
7.9787	0.000104124		7.7566	0.158149		48.3789	63.2103
7.98689	0.000133551		7.76479	0.158491		48.3871	63.2356
7.99508	0.000146797		7.77298	0.158442		48.3953	63.4542
8.00327	0.000138632		7.78117	0.158392		48.4035	63.517
8.01146	0.000130466		7.78936	0.158222		48.4117	63.5046
8.01965	0.000376379		7.79755	0.157398		48.4199	63.5813
8.02784	0.000400086		7.80574	0.155413		48.428	63.7435
8.03603	0.000394739		7.81393	0.155854		48.4362	63.8236
8.04422	0.000389392		7.82212	0.15604		48.4444	63.8155
8.05241	0.00037343		7.83031	0.156063		48.4526	63.6716
8.0606	-0.000244699		7.8385	0.154131		48.4608	63.6488
8.06879	-0.000222513		7.84669	0.1522		48.469	63.5231
8.07698	-0.00016517		7.85488	0.153877		48.4772	63.2839
8.08517	-0.000107827		7.86307	0.155011		48.4854	63.4355
8.09336	1.64089e-05		7.87126	0.155528		48.4936	63.2605
8.10155	6.9202e-05		7.87945	0.155666		48.5018	63.0854
8.10974	9.18227e-05		7.88764	0.155094		48.5099	63.1697
8.11793	7.06817e-05		7.89583	0.154523		48.5181	63.5513
8.12612	4.95408e-05		7.90402	0.151728		48.5263	63.6287
8.13431	-9.83951e-05		7.91221	0.145046		48.5345	63.69
8.1425	-0.000104591		7.9204	0.14487		48.5427	63.4946
8.15069	-7.72228e-06		7.92859	0.146696		48.5509	63.4449
8.15888	1.36185e-05		7.93678	0.146799		48.5591	63.4564
8.16707	2.3307e-05		7.94497	0.146832		48.5673	63.4672
8.17526	2.51196e-05		7.95316	0.146781		48.5755	63.4579
8.18345	-3.10531e-05		7.96135	0.14673		48.5837	63.4736
8.19164	-8.72258e-05		7.96954	0.146039		48.5918	63.4882
8.19983	-3.37493e-05		7.97773	0.14528		48.6	63.6497
8.20802	-2.53064e-05		7.98592	0.145312		48.6082	63.5914
8.2162	-2.64288e-05		7.99411	0.14525		48.6164	63.6454
8.22439	-2.75511e-05		8.0023	0.145188		48.6246	63.7169
8.23258	-3.2512e-05		8.01049	0.144768		48.6328	63.8252
8.24077	-6.44053e-05		8.01868	0.137534		48.641	63.7347
8.24896	-0.000210857		8.02687	0.137693		48.6492	63.7159
8.25715	-0.000324223		8.03506	0.138052		48.6574	63.7425
8.26534	-0.000143434		8.04325	0.138411		48.6655	63.7031
8.27353	-0.000110193		8.05144	0.138395		48.6737	63.7759
8.28172	-7.69528e-05		8.05963	0.138379		48.6819	63.6963
8.28991	-7.57139e-05		8.06781	0.138313		48.6901	63.645
8.2981	-0.000100301		8.076	0.137904		48.6983	63.4822
8.30629	-0.000124887		8.08419	0.136664		48.7065	63.71
8.31448	-0.000230663		8.09238	0.137751		48.7147	63.7849
8.32267	-0.000229782		8.10057	0.138516		48.7229	63.6989
8.33086	-8.66174e-05		8.10876	0.142445		48.7311	63.6386
8.33905	-6.95974e-05		8.11695	0.142502		48.7393	63.5087
8.34724	-5.25773e-05		8.12514	0.141994		48.7474	63.2899
8.35543	0.000113656		8.13333	0.141485		48.7556	63.3832
8.36362	0.000114153		8.14152	0.138823		48.7638	63.5427
8.37181	0.000113188		8.14971	0.138062		48.772	63.611
8.38	0.000112223		8.1579	0.135961		48.7802	63.7363
8.38819	2.66807e-05		8.16609	0.135587		48.7884	64.233
8.39638	1.73012e-05		8.17428	0.135213		48.7966	64.1999
8.40457	-0.000114146		8.18247	0.130266		48.8048	64.0951
8.41276	-0.00012314		8.19066	0.128058		48.813	64.0815
8.42095	-0.000132133		8.19885	0.128751		48.8212	64.0395
8.42914	-0.000145172		8.20704	0.132585		48.8293	63.9327
8.43733	-0.000119431		8.21523	0.133004		48.8375	63.9769
8.44552	-0.000106644		8.22342	0.133091		48.8457	63.8053
8.45371	-0.000100334		8.23161	0.133085		48.8539	63.9573
8.4619	-9.94001e-05		8.2398	0.133079		48.8621	63.9589
8.47009	-0.000147779		8.24799	0.133027		48.8703	64.0045
8.47828	-0.000196157		8.25618	0.132882		48.8785	63.883
8.48647	-0.000331742		8.26437	0.132122		48.8867	64.7238
8.49466	-0.000315463		8.27256	0.127762		48.8949	64.7797
8.50285	-0.000270415		8.28075	0.124833		48.9031	64.5737
8.51104	-0.000253458		8.28894	0.122169		48.9112	64.2574
8.51923	-0.000261988		8.29713	0.122845		48.9194	64.1327
8.52742	-0.000270518		8.30532	0.12352		48.9276	64.2137
8.53561	-0.000341357		8.31351	0.124445		48.9358	64.2787
8.5438	-0.000331556		8.3217	0.125529		48.944	64.3092
8.55199	-0.000316014		8.32989	0.12558		48.9522	64.0348
8.56018	-0.00031311		8.33808	0.125597		48.9604	63.963
8.56837	-0.000310206		8.34627	0.125428		48.9686	63.9564
8.57656	-0.000214247		8.35446	0.12526		48.9768	63.8652
8.58475	-0.000191777		8.36265	0.124504		48.985	63.7944
8.59293	-0.000169307		8.37084	0.122205		48.9931	63.8426
8.60112	-0.000169912		8.37903	0.118741		49.0013	63.8855
8.60931	-0.000170518		8.38722	0.118529		49.0095	63.9245
8.6175	-0.000172035		8.39541	0.118318		49.0177	63.9942
8.62569	-0.000252052		8.4036	0.117868		49.0259	63.9997
8.63388	-0.000414357		8.41179	0.114497		49.0341	63.958
8.64207	-0.000378719		8.41998	0.111851		49.0423	63.9548
8.65026	-0.000287563		8.42817	0.111849		49.0505	63.7933
8.65845	-0.000280993		8.43636	0.111846		49.0587	63.7338
8.66664	-0.000225668		8.44454	0.11176		49.0668	64.0391
8.67483	-0.000198849		8.45273	0.111579		49.075	64.2276
8.68302	-0.000210108		8.46092	0.111343		49.0832	64.253
8.69121	-0.000221366		8.46911	0.111106		49.0914	64.2722
8.6994	-0.000248546		8.4773	0.110176		49.0996	64.3343
8.70759	-0.000327957		8.48549	0.109245		49.1078	64.4272
8.71578	-0.000219037		8.49368	0.10698		49.116	64.5735
8.72397	-0.00020183		8.50187	0.105992		49.1242	64.9797
8.73216	-0.000227852		8.51006	0.105005		49.1324	64.5705
8.74035	-0.000253874		8.51825	0.102769		49.1406	64.4503
8.74854	-0.000309891		8.52644	0.102597		49.1487	64.0464
8.75673	-0.000312034		8.53463	0.10585		49.1569	64.1684
8.76492	-0.000314177		8.54282	0.106813		49.1651	64.2807
8.77311	-0.000339864		8.55101	0.107777		49.1733	64.3568
8.7813	-0.000401232		8.5592	0.108242		49.1815	64.7453
8.78949	-0.000384607		8.56739	0.109914		49.1897	64.824
8.79768	-0.000382308		8.57558	0.110725		49.1979	64.8562
8.80587	-0.00038001		8.58377	0.108867		49.2061	64.9622
8.81406	-0.000296334		8.59196	0.107009		49.2143	64.9069
8.82225	-0.000282382		8.60015	0.103007		49.2225	64.8368
8.83044	-0.000281216		8.60834	0.101226		49.2306	64.7629
8.83863	-0.00028005		8.61653	0.103236		49.2388	64.6754
8.84682	-0.000232477		8.62472	0.103327		49.247	64.1856
8.85501	-0.000199288		8.63291	0.103356		49.2552	64.1549
8.8632	-0.000195617		8.6411	0.103306		49.2634	64.4119
8.87139	-0.000196077		8.64929	0.103256		49.2716	64.4263
8.87958	-0.000196538		8.65748	0.103127		49.2798	64.3453
8.88777	-0.000197825		8.66567	0.102666		49.288	64.3472
8.89596	-0.000211219		8.67386	0.101487		49.2962	64.2858
8.90415	-0.000245521		8.68205	0.101035		49.3044	64.0737
8.91234	-0.000314671		8.69024	0.100583		49.3125	64.2456
8.92053	-0.000316932		8.69843	0.0995777		49.3207	64.2741
8.92872	-0.000319192		8.70662	0.0983849		49.3289	64.2722
8.93691	-0.000326179		8.71481	0.0978706		49.3371	64.2703
8.9451	-0.000305788		8.723	0.0973563		49.3453	64.3068
8.95329	-0.000236443		8.73119	0.0955063		49.3535	64.6365
8.96148	-0.000239145		8.73938	0.0963206		49.3617	64.5847
8.96966	-0.000241847		8.74757	0.0967135		49.3699	64.5689
8.97785	-0.000250883		8.75576	0.0968725		49.3781	64.576
8.98604	-0.000252432		8.76395	0.0966834		49.3863	64.7066
8.99423	-0.000253981		8.77214	0.0964944		49.3944	64.7398
9.00242	-0.000264176		8.78033	0.0951755		49.4026	64.7892
9.01061	-0.000272343		8.78852	0.0951675		49.4108	64.8408
9.0188	-0.000280511		8.79671	0.0951595		49.419	64.8742
9.02699	-0.000319701		8.8049	0.0950495		49.4272	64.8964
9.03518	-0.000223291		8.81309	0.0948235		49.4354	64.9039
9.04337	-0.000210152		8.82128	0.0943657		49.4436	64.9365
9.05156	-0.000197013		8.82946	0.09293		49.4518	64.9109
9.05975	-0.000152293		8.83765	0.0929051		49.46	64.8782
9.06794	-0.000118951		8.84584	0.0928803		49.4681	64.809
9.07613	-0.000103392		8.85403	0.0928137		49.4763	64.4618
9.08432	-8.78336e-05		8.86222	0.0924176		49.4845	64.5367
9.09251	-2.15388e-05		8.87041	0.0898778		49.4927	64.8258
9.1007	6.1906e-06		8.8786	0.0888972		49.5009	64.6886
9.10889	-3.12083e-06		8.88679	0.088683		49.5091	64.6521
9.11708	-1.24322e-05		8.89498	0.0884687		49.5173	64.6378
9.12527	-0.000111195		8.90317	0.0880252		49.5255	64.4977
9.13346	-0.000165161		8.91136	0.0871349		49.5337	64.9435
9.14165	-0.000167649		8.91955	0.0864352		49.5419	65.1234
9.14984	-0.000170137		8.92774	0.0864474		49.55	65.1597
9.15803	-0.000179502		8.93593	0.0864498		49.5582	65.2706
9.16622	-0.000182486		8.94412	0.0862161		49.5664	65.2565
9.17441	-0.00018547		8.95231	0.0859823		49.5746	65.6171
9.1826	-0.000141975		8.9605	0.0859542		49.5828	65.4297
9.19079	-0.000100598		8.96869	0.085926		49.591	65.3678
9.19898	-5.92219e-05		8.97688	0.0858203		49.5992	65.3264
9.20717	-3.1754e-05		8.98507	0.083196		49.6074	65.2341
9.21536	-4.28602e-06		8.99326	0.0832583		49.6156	65.214
9.22355	4.50633e-05		9.00145	0.0830748		49.6238	64.9073
9.23174	4.12645e-05		9.00964	0.0828912		49.6319	64.9032
9.23993	3.74658e-05		9.01783	0.0825203		49.6401	64.8696
9.24812	1.22443e-05		9.02602	0.0820395		49.6483	64.9438
9.25631	-0.00012559		9.03421	0.0815587		49.6565	64.8787
9.2645	-0.000195406		9.0424	0.0805253		49.6647	64.9236
9.27269	-0.000154728		9.05059	0.0820948		49.6729	65.0052
9.28088	-0.000147109		9.05878	0.0822542		49.6811	65.0251
9.28907	-0.00014576		9.06697	0.082262		49.6893	64.9269
9.29726	-0.00016322		9.07516	0.0822462		49.6975	64.9572
9.30545	-0.000180679		9.08335	0.0822305		49.7057	64.8582
9.31364	-0.000216946		9.09154	0.0814126		49.7138	64.6677
9.32183	-0.000278494		9.09973	0.0808268		49.722	64.6649
9.33002	-0.000367719		9.10792	0.0801001		49.7302	64.8282
9.33821	-0.00041768		9.11611	0.0793734		49.7384	64.9263
9.3464	-0.000175324		9.1243	0.0779407		49.7466	64.9067
9.35458	-0.000144172		9.13249	0.0778991		49.7548	64.8481
9.36277	-0.00014326		9.14068	0.0778575		49.763	64.8246
9.37096	-0.000148533		9.14887	0.0773712		49.7712	65.1243
9.37915	-0.000153807		9.15706	0.0730685		49.7794	65.1921
9.38734	-0.000361465		9.16525	0.0767048		49.7876	65.1803
9.39553	-0.00018556		9.17344	0.076803		49.7957	65.1669
9.40372	-0.000161683		9.18163	0.0767861		49.8039	65.0457
9.41191	8.50173e-05		9.18982	0.0767691		49.8121	65.126
9.4201	0.000165553		9.19801	0.0755422		49.8203	65.6075
9.42829	0.000204602		9.20619	0.0756982		49.8285	65.6346
9.43648	0.000162582		9.21438	0.077274		49.8367	65.8052
9.44467	0.000120562		9.22257	0.0772922		49.8449	65.8523
9.45286	2.13444e-05		9.23076	0.0772865		49.8531	65.8966
9.46105	3.1271e-05		9.23895	0.0772807		49.8613	65.5663
9.46924	3.61087e-05		9.24714	0.0770211		49.8694	65.4827
9.47743	3.78108e-05		9.25533	0.0759612		49.8776	65.7655
9.48562	1.31229e-05		9.26352	0.0735959		49.8858	65.4385
9.49381	-1.15649e-05		9.27171	0.0732683		49.894	65.3098
9.502	-3.85806e-05		9.2799	0.0729407		49.9022	65.1717
9.51019	0.000332443		9.28809	0.0717633		49.9104	65.2625
9.51838	0.000509685		9.29628	0.0692014		49.9186	65.2653
9.52657	0.000592056		9.30447	0.06973		49.9268	65.2888
9.53476	0.000442752		9.31266	0.0710856		49.935	65.262
9.54295	0.000293449		9.32085	0.0724412		49.9432	65.2433
9.55114	-2.18433e-05		9.32904	0.0724122		49.9513	65.431
9.55933	-0.000289747		9.33723	0.0723832		49.9595	65.544
9.56752	-0.000315978		9.34542	0.0722869		49.9677	65.6567
9.57571	-0.000335867		9.35361	0.0720917		49.9759	65.5535
9.5839	-0.000355757		9.3618	0.0720577		49.9841	65.5304
9.59209	-0.00039645		9.36999	0.0720237		49.9923	65.5486
9.60028	-0.000256818		9.37818	0.0717254		50.0005	65.5785
9.60847	-9.72507e-05		9.38637	0.0710386		50.0087	65.4549
9.61666	5.10802e-05		9.39456	0.0667175		50.0169	65.6304
9.62485	6.59237e-05		9.40275	0.0665831		50.0251	65.5842
9.63304	6.38282e-05		9.41094	0.0665832		50.0332	65.5836
9.64123	6.17326e-05		9.41913	0.0665763		50.0414	65.5819
9.64942	5.42551e-05		9.42732	0.0665694		50.0496	65.6325
9.65761	1.60716e-05		9.43551	0.0657198		50.0578	65.5474
9.6658	-0.000162115		9.4437	0.0636684		50.066	65.4552
9.67399	-0.000117173		9.45189	0.0631168		50.0742	65.5601
9.68218	-0.000107684		9.46008	0.0676902		50.0824	65.6457
9.69037	-9.81962e-05		9.46827	0.0676862		50.0906	65.6578
9.69856	-5.20877e-05		9.47646	0.0676822		50.0988	65.7255
9.70675	0.000120088		9.48465	0.0676732		50.107	65.4394
9.71494	0.000129001		9.49284	0.0645063		50.1151	65.4051
9.72313	0.000129607		9.50103	0.0659171		50.1233	65.5366
9.73131	0.000130213		9.50922	0.0665942		50.1315	65.6483
9.7395	0.000259459		9.51741	0.0666309		50.1397	65.6995
9.74769	0.000214067		9.5256	0.066527		50.1479	65.5802
9.75588	0.000168675		9.53379	0.0664232		50.1561	65.3613
9.76407	4.9288e-05		9.54198	0.0662013		50.1643	65.3331
9.77226	-2.03107e-05		9.55017	0.0622551		50.1725	65.7902
9.78045	-1.68105e-05		9.55836	0.0610406		50.1807	65.959
9.78864	-1.63627e-05		9.56655	0.0635253		50.1888	65.9159
9.79683	-3.65697e-05		9.57474	0.0647493		50.197	65.9726
9.80502	-5.67767e-05		9.58292	0.0645462		50.2052	66.0619
9.81321	-9.44851e-05		9.59111	0.064343		50.2134	65.9905
9.8214	-0.000132194		9.5993	0.0633668		50.2216	65.6728
9.82959	-0.00024115		9.60749	0.0623395		50.2298	65.5632
9.83778	-0.000291875		9.61568	0.0643548		50.238	65.4538
9.84597	-0.000199691		9.62387	0.0661752		50.2462	65.6695
9.85416	-0.000164787		9.63206	0.0662761		50.2544	65.8156
9.86235	-0.000183436		9.64025	0.0662185		50.2626	65.7485
9.87054	-0.000202084		9.64844	0.0661608		50.2707	65.7327
9.87873	-0.000242509		9.65663	0.0660355		50.2789	65.7148
9.88692	-0.000275836		9.66482	0.0656968		50.2871	65.7305
9.89511	-0.0001576		9.67301	0.0635938		50.2953	65.7674
9.9033	-0.000145196		9.6812	0.0600042		50.3035	65.7165
9.91149	-0.000132793		9.68939	0.0623566		50.3117	65.8725
9.91968	-0.000117116		9.69758	0.0625877		50.3199	66.4709
9.92787	-0.000111147		9.70577	0.0626376		50.3281	66.345
9.93606	-0.00011213		9.71396	0.0624646		50.3363	66.2469
9.94425	-0.000113113		9.72215	0.0622916		50.3445	66.2323
9.95244	-4.93461e-05		9.73034	0.0603726		50.3526	66.2176
9.96063	-4.31445e-05		9.73853	0.0613943		50.3608	66.4364
9.96882	-4.16898e-05		9.74672	0.0616357		50.369	66.1847
9.97701	-4.45073e-05		9.75491	0.0616232		50.3772	66.0701
9.9852	-4.73247e-05		9.7631	0.0616106		50.3854	66.0871
9.99339	-0.000183771		9.77129	0.0609335		50.3936	66.1037
10.0016	-0.000265233		9.77948	0.0581258		50.4018	66.1705
10.0098	-0.000110903		9.78767	0.060104		50.41	66.2497
10.018	-4.24032e-05		9.79586	0.0605029		50.4182	66.3759
10.0261	-1.69008e-05		9.80405	0.0605865		50.4264	66.3742
10.0343	-1.32544e-05		9.81224	0.0606255		50.4345	66.3705
10.0425	-1.30574e-05		9.82043	0.0606443		50.4427	66.4091
10.0507	-1.77446e-05		9.82862	0.0606529		50.4509	66.3718
10.0589	-2.24317e-05		9.83681	0.0585476		50.4591	66.4894
10.0671	-6.04659e-05		9.845	0.0564422		50.4673	66.4829
10.0753	-9.85e-05		9.85319	0.0599414		50.4755	66.4107
10.0835	-0.000187718		9.86138	0.0616264		50.4837	66.3605
10.0917	-0.000169615		9.86957	0.0615577		50.4919	66.2788
10.0999	-8.01589e-05		9.87776	0.061489		50.5001	66.1887
10.108	-7.98374e-05		9.88595	0.0612949		50.5083	66.1766
10.1162	-8.30678e-05		9.89414	0.0586703		50.5164	66.1478
10.1244	-8.62983e-05		9.90233	0.0558372		50.5246	66.1175
10.1326	-0.000134043		9.91052	0.0546317		50.5328	65.9376
10.1408	-0.000134973		9.91871	0.0581072		50.541	65.9496
10.149	-0.000125388		9.9269	0.0585274		50.5492	65.9812
10.1572	-0.000120974		9.93509	0.058343		50.5574	66.0872
10.1654	-0.000123145		9.94328	0.0581585		50.5656	66.1902
10.1736	-0.000125316		9.95147	0.0560593		50.5738	66.276
10.1818	-0.000175756		9.95966	0.0560121		50.582	66.3165
10.1899	-0.000226195		9.96784	0.0567778		50.5901	66.3602
10.1981	-0.000227316		9.97603	0.0570265		50.5983	66.5718
10.2063	-0.000227026		9.98422	0.0572751		50.6065	66.5475
10.2145	-0.000227193		9.99241	0.057533		50.6147	66.65
10.2227	-0.00022736		10.0006	0.0575106		50.6229	66.5871
10.2309	-0.000321367		10.0088	0.0574883		50.6311	66.5505
10.2391	-0.000368699		10.017	0.0573619		50.6393	66.5389
10.2473	3.33238e-05		10.0252	0.0568463		50.6475	66.2548
10.2555	0.000195783		10.0334	0.055722		50.6557	66.6503
10.2637	0.000269039		10.0416	0.0569024		50.6639	66.7026
10.2718	0.000282524		10.0497	0.0571874		50.672	66.8186
10.28	9.81264e-05		10.0579	0.0573211		50.6802	66.8319
10.2882	-8.62711e-05		10.0661	0.057341		50.6884	67.0039
10.2964	6.04706e-06		10.0743	0.0573461		50.6966	67.0621
10.3046	2.14837e-05		10.0825	0.0566703		50.7048	67.0881
10.3128	1.9849e-05		10.0907	0.0559944		50.713	67.0876
10.321	1.82143e-05		10.0989	0.0559573		50.7212	66.9448
10.3292	-2.72104e-05		10.1071	0.0559202		50.7294	66.8463
10.3374	-4.57787e-05		10.1153	0.0554688		50.7376	66.8
10.3455	-6.43469e-05		10.1235	0.0514468		50.7458	66.7856
10.3537	-0.000157906		10.1316	0.0528781		50.7539	66.8185
10.3619	0.000104281		10.1398	0.0549138		50.7621	66.8503
10.3701	0.000218969		10.148	0.0549611		50.7703	66.8
10.3783	0.000151025		10.1562	0.0549805		50.7785	66.7732
10.3865	8.30801e-05		10.1644	0.0548431		50.7867	66.9036
10.3947	-7.17989e-05		10.1726	0.0547058		50.7949	66.8099
10.4029	0.000202201		10.1808	0.0538606		50.8031	66.7691
10.4111	0.000220675		10.189	0.0530155		50.8113	66.7591
10.4193	0.000228141		10.1972	0.0519648		50.8195	66.8432
10.4274	0.000229349		10.2053	0.054472		50.8277	66.8546
10.4356	0.000229587		10.2135	0.0544185		50.8358	66.9052
10.4438	0.000213843		10.2217	0.0543649		50.844	66.8918
10.452	0.000198099		10.2299	0.0542051		50.8522	66.9467
10.4602	8.70103e-05		10.2381	0.0533609		50.8604	66.566
10.4684	-0.000102823		10.2463	0.0527043		50.8686	66.7246
10.4766	-0.000122622		10.2545	0.0516144		50.8768	66.7939
10.4848	-6.41728e-05		10.2627	0.0505245		50.885	66.882
10.493	-3.56488e-05		10.2709	0.0502736		50.8932	66.9307
10.5012	-5.19783e-05		10.2791	0.0500227		50.9014	66.9517
10.5093	-6.83077e-05		10.2872	0.0494655		50.9096	66.9442
10.5175	-0.000112496		10.2954	0.0483474		50.9177	66.8316
10.5257	-0.000128491		10.3036	0.0482484		50.9259	67.2789
10.5339	-0.000172325		10.3118	0.051603		50.9341	67.2521
10.5421	-0.000351993		10.32	0.0520355		50.9423	67.3429
10.5503	-0.000451738		10.3282	0.0522507		50.9505	67.2955
10.5585	-0.000179237		10.3364	0.0523266		50.9587	67.3474
10.5667	-0.000182992		10.3446	0.0520646		50.9669	67.2865
10.5749	-0.000186747		10.3528	0.0518026		50.9751	66.8947
10.5831	-0.000197775		10.361	0.0470517		50.9833	67.2502
10.5912	-0.000221019		10.3691	0.0460476		50.9914	67.3486
10.5994	-0.000372311		10.3773	0.0482048		50.9996	67.3055
10.6076	-0.000350427		10.3855	0.0483729		51.0078	67.3229
10.6158	-0.000328543		10.3937	0.0484561		51.016	67.3052
10.624	-0.00026528		10.4019	0.0484783		51.0242	66.8821
10.6322	-0.000236544		10.4101	0.0485004		51.0324	66.9934
10.6404	-0.000207809		10.4183	0.0489518		51.0406	67.0612
10.6486	-8.94981e-05		10.4265	0.0490215		51.0488	66.953
10.6568	-5.70133e-05		10.4347	0.0490178		51.057	67.6577
10.665	-4.27133e-05		10.4429	0.0490141		51.0652	67.5982
10.6731	-3.75058e-05		10.451	0.0485172		51.0733	67.5849
10.6813	-6.146e-05		10.4592	0.0488861		51.0815	67.5813
10.6895	-8.54142e-05		10.4674	0.049255		51.0897	67.7699
10.6977	-0.000211119		10.4756	0.0493338		51.0979	67.8267
10.7059	-0.000318321		10.4838	0.0493436		51.1061	67.8734
10.7141	-0.000197332		10.492	0.0493533		51.1143	67.7232
10.7223	-0.000204105		10.5002	0.0507044		51.1225	67.7114
10.7305	-0.000210878		10.5084	0.0515306		51.1307	67.5204
10.7387	-0.000229359		10.5166	0.0510588		51.1389	67.7792
10.7468	-0.000267584		10.5248	0.050587		51.1471	67.7415
10.755	-0.000270692		10.5329	0.0494801		51.1552	67.7078
10.7632	-0.0002738		10.5411	0.0472177		51.1634	67.6343
10.7714	-0.000233343		10.5493	0.0472252		51.1716	67.409
10.7796	-0.000217826		10.5575	0.0472328		51.1798	67.3265
10.7878	-0.000218432		10.5657	0.0488521		51.188	67.3254
10.796	-0.000219038		10.5739	0.0502896		51.1962	67.3243
10.8042	-0.000220897		10.5821	0.0509311		51.2044	67.1835
10.8124	-0.000230353		10.5903	0.0509704		51.2126	67.4259
10.8206	-0.000223708		10.5985	0.0501727		51.2208	67.4629
10.8287	-0.000222127		10.6066	0.049375		51.229	67.4754
10.8369	-0.000245235		10.6148	0.0477607		51.2371	67.5276
10.8451	-0.000268344		10.623	0.047313		51.2453	67.7335
10.8533	-0.000315273		10.6312	0.0468654		51.2535	67.6378
10.8615	-0.00017934		10.6394	0.0456819		51.2617	67.5418
10.8697	-0.000166892		10.6476	0.0464217		51.2699	67.5601
10.8779	-0.000163105		10.6558	0.0475262		51.2781	67.6512
10.8861	-0.000159318		10.664	0.047123		51.2863	67.6782
10.8943	-3.96517e-05		10.6722	0.0467198		51.2945	67.7707
10.9025	-4.08339e-05		10.6804	0.0456564		51.3027	67.5657
10.9106	-4.20161e-05		10.6885	0.0434095		51.3109	67.4821
10.9188	-4.98952e-05		10.6967	0.0440025		51.319	67.7955
10.927	-9.56466e-05		10.7049	0.0440041		51.3272	67.9732
10.9352	-0.000139738		10.7131	0.0439998		51.3354	67.9913
10.9434	-0.000239553		10.7213	0.0439956		51.3436	67.9878
10.9516	-3.91673e-05		10.7295	0.0435111		51.3518	67.9607
10.9598	-1.12669e-05		10.7377	0.0430266		51.36	67.9501
10.968	-6.8009e-06		10.7459	0.0419614		51.3682	67.9206
10.9762	-4.11158e-05		10.7541	0.0427482		51.3764	67.8351
10.9844	-7.54307e-05		10.7623	0.0430776		51.3846	67.6377
10.9925	-0.000236976		10.7704	0.0427376		51.3927	67.7056
11.0007	-0.000320358		10.7786	0.0423977		51.4009	67.7888
11.0089	-0.00023748		10.7868	0.0400435		51.4091	67.8448
11.0171	-0.000140233		10.795	0.0410326		51.4173	67.9006
11.0253	-0.000111715		10.8032	0.0421219		51.4255	67.9601
11.0335	-9.92291e-05		10.8114	0.0425617		51.4337	67.7045
11.0417	-8.6743e-05		10.8196	0.0423204		51.4419	67.668
11.0499	4.49554e-06		10.8278	0.0420791		51.4501	67.6665
11.0581	4.6089e-06		10.836	0.0400301		51.4583	67.658
11.0662	3.88823e-06		10.8442	0.0440856		51.4665	67.6462
11.0744	3.16755e-06		10.8523	0.0444494		51.4746	67.7692
11.0826	-2.31931e-05		10.8605	0.0446176		51.4828	67.93
11.0908	-4.95538e-05		10.8687	0.0446695		51.491	68.0184
11.099	-0.000163542		10.8769	0.0440128		51.4992	68.2654
11.1072	-0.000277233		10.8851	0.0433561		51.5074	68.3887
11.1154	-0.000430999		10.8933	0.0382465		51.5156	68.2946
11.1236	-0.000443787		10.9015	0.0388611		51.5238	68.2602
11.1318	-5.41173e-05		10.9097	0.039558		51.532	68.2291
11.14	-4.66896e-05		10.9179	0.0402549		51.5402	68.2739
11.1481	-5.18857e-05		10.926	0.042765		51.5484	68.3853
11.1563	-5.70817e-05		10.9342	0.0432555		51.5565	68.1818
11.1645	-6.791e-05		10.9424	0.0437459		51.5647	68.2414
11.1727	-0.000150359		10.9506	0.0441303		51.5729	68.1241
11.1809	-0.000154703		10.9588	0.0443177		51.5811	68.0918
11.1891	-0.000159047		10.967	0.0443342		51.5893	68.0036
11.1973	-0.000244927		10.9752	0.0443183		51.5975	67.9871
11.2055	-0.000218588		10.9834	0.0443025		51.6057	67.8512
11.2137	-0.000207385		10.9916	0.0439449		51.6139	67.6659
11.2219	-0.000196183		10.9998	0.0435874		51.6221	67.1676
11.23	-0.000151833		11.0079	0.0424275		51.6303	68.0039
11.2382	-0.000133705		11.0161	0.0413409		51.6384	68.219
11.2464	-0.000133375		11.0243	0.0400424		51.6466	68.2282
11.2546	-0.000133046		11.0325	0.0403213		51.6548	68.2378
11.2628	-5.06522e-05		11.0407	0.0403408		51.663	68.3594
11.271	-1.07895e-05		11.0489	0.0403052		51.6712	68.3261
11.2792	-1.46069e-07		11.0571	0.0402696		51.6794	68.1179
11.2874	-2.32428e-06		11.0653	0.0402872		51.6876	68.1587
11.2956	-4.50249e-06		11.0735	0.0402898		51.6958	68.21
11.3038	-9.24502e-06		11.0817	0.0402048		51.704	68.2462
11.3119	-5.75747e-05		11.0898	0.0401197		51.7121	68.2718
11.3201	-8.97696e-05		11.098	0.0381514		51.7203	68.2786
11.3283	-0.000121964		11.1062	0.0383194		51.7285	68.378
11.3365	-0.00019574		11.1144	0.038379		51.7367	68.5856
11.3447	-0.000255355		11.1226	0.0383113		51.7449	68.6311
11.3529	-0.000190259		11.1308	0.0382435		51.7531	68.5364
11.3611	-0.000157739		11.139	0.0371561		51.7613	68.2143
11.3693	-0.00014206		11.1472	0.0356172		51.7695	68.9799
11.3775	-0.000157992		11.1554	0.0377975		51.7777	68.7552
11.3857	-0.000173924		11.1636	0.0388477		51.7859	68.8885
11.3938	-0.000319495		11.1717	0.039898		51.794	68.7946
11.402	-0.000203848		11.1799	0.0396253		51.8022	68.9279
11.4102	-0.000198052		11.1881	0.0393527		51.8104	68.9868
11.4184	-0.000197521		11.1963	0.0385756		51.8186	69.0034
11.4266	-0.000202295		11.2045	0.0370145		51.8268	68.8676
11.4348	-0.00020707		11.2127	0.0343242		51.835	68.7747
11.443	-0.000118979		11.2209	0.0378106		51.8432	68.8243
11.4512	-7.52199e-05		11.2291	0.0380509		51.8514	68.8189
11.4594	-5.96265e-05		11.2373	0.038107		51.8596	68.8188
11.4675	-4.4033e-05		11.2455	0.0381159		51.8678	68.8581
11.4757	-3.80464e-05		11.2536	0.0381165		51.8759	68.9107
11.4839	-3.53188e-05		11.2618	0.0380967		51.8841	68.9897
11.4921	-5.52161e-05		11.27	0.0380769		51.8923	69.1598
11.5003	-7.51135e-05		11.2782	0.0379973		51.9005	69.1617
11.5085	-9.02803e-05		11.2864	0.0367376		51.9087	69.1335
11.5167	-0.000105447		11.2946	0.0364913		51.9169	68.8661
11.5249	-0.000238851		11.3028	0.0367741		51.9251	68.9131
11.5331	-0.000261584		11.311	0.037243		51.9333	68.7692
11.5413	-0.000284318		11.3192	0.0377118		51.9415	68.8377
11.5494	-0.000371501		11.3273	0.0382588		51.9497	69.0473
11.5576	-0.000286163		11.3355	0.038203		51.9578	68.8678
11.5658	-0.000267814		11.3437	0.0381472		51.966	68.9123
11.574	-0.000259744		11.3519	0.0378411		51.9742	68.939
11.5822	-0.000258602		11.3601	0.0369347		51.9824	69.0364
11.5904	-0.000257461		11.3683	0.0368281		51.9906	69.1282
11.5986	-0.00019397		11.3765	0.0367214		51.9988	69.3865
11.6068	-0.000212125		11.3847	0.0364813		52.007	68.6357
11.615	-0.000230279		11.3929	0.0363301		52.0152	68.755
11.6232	-0.000280673		11.4011	0.0361789		52.0234	68.8746
11.6313	-0.000194267		11.4092	0.035753		52.0316	68.978
11.6395	-0.000169522		11.4174	0.0354472		52.0397	68.8937
11.6477	-9.78369e-05		11.4256	0.0349343		52.0479	68.8599
11.6559	-8.372e-05		11.4338	0.0319645		52.0561	68.9529
11.6641	-8.16419e-05		11.442	0.0315988		52.0643	69.1207
11.6723	-8.33504e-05		11.4502	0.0327882		52.0725	69.2352
11.6805	-8.50589e-05		11.4584	0.032509		52.0807	69.3192
11.6887	-8.86859e-05		11.4666	0.0322297		52.0889	69.3431
11.6969	-9.61499e-05		11.4748	0.0310801		52.0971	69.4013
11.7051	-0.000183144		11.483	0.0287211		52.1053	69.3816
11.7132	-0.000369772		11.4911	0.0328529		52.1134	69.4087
11.7214	-0.000447061		11.4993	0.0336747		52.1216	69.2667
11.7296	-0.000450867		11.5075	0.0340687		52.1298	68.9537
11.7378	-0.000101733		11.5157	0.0340573		52.138	69.0107
11.746	-4.92834e-05		11.5239	0.0340458		52.1462	69.0668
11.7542	3.16577e-06		11.5321	0.0338742		52.1544	69.2107
11.7624	4.71855e-05		11.5403	0.0333823		52.1626	69.2576
11.7706	6.34511e-05		11.5485	0.0314386		52.1708	69.1791
11.7788	4.69387e-05		11.5567	0.0322718		52.179	69.07
11.787	3.04264e-05		11.5649	0.0326762		52.1872	68.9547
11.7951	2.06342e-05		11.573	0.0327926		52.1953	69.1775
11.8033	1.0842e-05		11.5812	0.0323127		52.2035	69.0214
11.8115	-0.000197048		11.5894	0.0318329		52.2117	69.0847
11.8197	-9.63138e-05		11.5976	0.0274258		52.2199	69.1232
11.8279	-4.69723e-05		11.6058	0.0277342		52.2281	69.2683
11.8361	-7.44516e-05		11.614	0.0317975		52.2363	69.2948
11.8443	-0.000101931		11.6222	0.0317716		52.2445	69.2917
11.8525	-0.000317521		11.6304	0.0317456		52.2527	69.255
11.8607	-0.000320543		11.6386	0.0316151		52.2609	69.3897
11.8688	-0.000323566		11.6468	0.0307259		52.2691	69.3223
11.877	-0.000332953		11.6549	0.0310624		52.2772	69.4105
11.8852	-0.000326189		11.6631	0.0310911		52.2854	69.4316
11.8934	-6.0713e-05		11.6713	0.0307417		52.2936	69.4655
11.9016	2.02519e-06		11.6795	0.0303923		52.3018	69.4619
11.9098	3.10873e-05		11.6877	0.0303333		52.31	69.6227
11.918	1.15771e-05		11.6959	0.0302743		52.3182	70.0462
11.9262	-7.93306e-06		11.7041	0.0301126		52.3264	70.375
11.9344	-5.36836e-05		11.7123	0.0300313		52.3346	70.3834
11.9426	-0.000151915		11.7205	0.0299501		52.3428	70.2013
11.9507	-0.000179938		11.7286	0.0292025		52.351	70.2692
11.9589	-6.76471e-05		11.7368	0.0274839		52.3591	70.2954
11.9671	-4.67603e-05		11.745	0.0282506		52.3673	70.2006
11.9753	-3.89031e-05		11.7532	0.0320075		52.3755	70.0603
11.9835	-4.7284e-05		11.7614	0.0323707		52.3837	69.5898
11.9917	-5.56648e-05		11.7696	0.0323717		52.3919	69.4879
11.9999	-0.000370717		11.7778	0.0323016		52.4001	69.4825
12.0081	-0.000361168		11.786	0.0322315		52.4083	69.4597
12.0163	-0.000351619		11.7942	0.0301835		52.4165	69.4315
12.0245	-0.000316216		11.8024	0.0295333		52.4247	69.3816
12.0326	-0.000213234		11.8105	0.0288831		52.4329	69.3284
12.0408	-0.000203173		11.8187	0.0274485		52.441	69.3464
12.049	-3.53212e-05		11.8269	0.0292499		52.4492	69.3369
12.0572	-3.35223e-05		11.8351	0.0318315		52.4574	69.5648
12.0654	-4.39756e-05		11.8433	0.0320791		52.4656	69.9316
12.0736	-5.44289e-05		11.8515	0.0321266		52.4738	69.7475
12.0818	-0.000111988		11.8597	0.0321431		52.482	69.7841
12.09	-0.000169217		11.8679	0.0315266		52.4902	69.7937
12.0982	-0.000170618		11.8761	0.0309101		52.4984	69.7926
12.1064	-0.00017202		11.8843	0.0307985		52.5066	69.8362
12.1145	-0.000193376		11.8924	0.0280791		52.5147	69.8355
12.1227	-0.00033695		11.9006	0.0255418		52.5229	69.8521
12.1309	-0.00043068		11.9088	0.0266113		52.5311	69.8651
12.1391	-0.000224315		11.917	0.0276809		52.5393	69.9747
12.1473	-0.000148936		11.9252	0.0281809		52.5475	69.9337
12.1555	-0.000148112		11.9334	0.0282658		52.5557	70.092
12.1637	-0.000147779		11.9416	0.0282529		52.5639	70.1442
12.1719	-0.000147446		11.9498	0.0282399		52.5721	70.2516
12.1801	-0.000149126		11.958	0.0281831		52.5803	70.2113
12.1883	-0.000150807		11.9662	0.0295667		52.5885	70.2514
12.1964	-0.000171356		11.9743	0.0302539		52.5966	70.2867
12.2046	-0.000221017		11.9825	0.0305929		52.6048	70.3316
12.2128	-0.00020657		11.9907	0.0307481		52.613	70.5363
12.221	-0.000201042		11.9989	0.0296482		52.6212	70.4924
12.2292	-0.000206792		12.0071	0.0285483		52.6294	70.4632
12.2374	-0.000212543		12.0153	0.0283385		52.6376	70.2963
12.2456	-0.00030291		12.0235	0.0285652		52.6458	70.2369
12.2538	-9.24562e-05		12.0317	0.0287919		52.654	70.331
12.262	0.000204814		12.0399	0.0297259		52.6622	70.2818
12.2701	0.000269193		12.0481	0.029882		52.6704	70.2973
12.2783	0.000297866		12.0562	0.0298951		52.6785	70.2862
12.2865	0.000302478		12.0644	0.0298301		52.6867	70.2525
12.2947	0.000206507		12.0726	0.0297652		52.6949	70.2502
12.3029	0.000110535		12.0808	0.0296222		52.7031	70.3496
12.3111	-0.000242532		12.089	0.0292798		52.7113	70.4844
12.3193	-0.000109747		12.0972	0.0277482		52.7195	70.6822
12.3275	-4.3418e-05		12.1054	0.0276194		52.7277	70.6767
12.3357	-1.04448e-05		12.1136	0.0274906		52.7359	70.8143
12.3439	-0.000107615		12.1218	0.0245278		52.7441	70.7528
12.352	-0.000204785		12.1299	0.0244638		52.7523	70.5883
12.3602	-0.000311027		12.1381	0.0283816		52.7604	70.5989
12.3684	-0.000157342		12.1463	0.0284636		52.7686	70.8825
12.3766	-9.30916e-05		12.1545	0.0279452		52.7768	70.6231
12.3848	-8.04727e-05		12.1627	0.0274267		52.785	70.5768
12.393	-7.75602e-05		12.1709	0.026351		52.7932	70.7059
12.4012	-7.46477e-05		12.1791	0.027818		52.8014	70.5769
12.4094	-7.16295e-05		12.1873	0.0280073		52.8096	70.4237
12.4176	-7.02685e-05		12.1955	0.0279951		52.8178	70.7685
12.4258	-8.04151e-05		12.2037	0.0279829		52.826	70.6016
12.4339	-9.05617e-05		12.2118	0.0258877		52.8342	70.7508
12.4421	-0.000398532		12.22	0.0251416		52.8423	70.8288
12.4503	-0.000442907		12.2282	0.0245674		52.8505	70.6645
12.4585	-0.000375668		12.2364	0.0277361		52.8587	70.6778
12.4667	-0.000349578		12.2446	0.0285695		52.8669	70.7007
12.4749	-0.000323489		12.2528	0.0286212		52.8751	70.7308
12.4831	-0.000107114		12.261	0.0285328		52.8833	70.7912
12.4913	-0.000101756		12.2692	0.0284444		52.8915	70.8835
12.4995	-0.000108121		12.2774	0.0276874		52.8997	70.9297
12.5077	-0.000114486		12.2856	0.0259347		52.9079	70.5237
12.5158	-0.000154281		12.2937	0.0257861		52.916	70.5511
12.524	-0.000234974		12.3019	0.0257047		52.9242	70.5522
12.5322	-0.000245575		12.3101	0.0256233		52.9324	70.5599
12.5404	-0.000245784		12.3183	0.02498		52.9406	71.0545
12.5486	-0.000207812		12.3265	0.0276068		52.9488	70.9392
12.5568	-0.000218656		12.3347	0.0289075		52.957	70.8845
12.565	-0.0002295		12.3429	0.0290798		52.9652	70.6594
12.5732	-0.000259009		12.3511	0.0290193		52.9734	70.3581
12.5814	-8.25393e-05		12.3593	0.0289589		52.9816	70.6498
12.5895	-5.75692e-05		12.3675	0.0282433		52.9898	70.7702
12.5977	-3.2599e-05		12.3756	0.025658		52.9979	70.9641
12.6059	1.36225e-05		12.3838	0.0267584		53.0061	71.0705
12.6141	1.66269e-05		12.392	0.0267756		53.0143	71.0578
12.6223	-2.96037e-06		12.4002	0.026754		53.0225	71.0693
12.6305	-2.25476e-05		12.4084	0.0267324		53.0307	71.1082
12.6387	-6.29889e-05		12.4166	0.0248758		53.0389	71.0489
12.6469	-0.000251471		12.4248	0.0250143		53.0471	70.9438
12.6551	-0.000316314		12.433	0.0250366		53.0553	70.7088
12.6633	-0.00027342		12.4412	0.0250589		53.0635	70.6018
12.6714	-7.415e-05		12.4493	0.0258543		53.0717	70.6278
12.6796	-3.03132e-05		12.4575	0.0260132		53.0798	70.6249
12.6878	-2.0799e-05		12.4657	0.0261721		53.088	70.6939
12.696	-1.66106e-05		12.4739	0.0284453		53.0962	70.7231
12.7042	-0.00010735		12.4821	0.0279814		53.1044	70.6513
12.7124	-0.000198089		12.4903	0.0275176		53.1126	70.7047
12.7206	-0.000254779		12.4985	0.0262125		53.1208	70.7925
12.7288	-0.000172564		12.5067	0.0235498		53.129	70.8246
12.737	-0.000159304		12.5149	0.0248899		53.1372	70.861
12.7452	-0.000159241		12.5231	0.0248711		53.1454	71.4931
12.7533	-0.000175469		12.5312	0.0248523		53.1536	71.711
12.7615	-0.000191698		12.5394	0.0245965		53.1617	71.602
12.7697	-0.00026299		12.5476	0.0240587		53.1699	71.5755
12.7779	-0.000263583		12.5558	0.0243112		53.1781	71.5859
12.7861	-0.000264176		12.564	0.0245637		53.1863	71.5744
12.7943	-0.000283993		12.5722	0.0245554		53.1945	71.2447
12.8025	-0.000287598		12.5804	0.0245471		53.2027	71.5159
12.8107	-0.000291203		12.5886	0.0245217		53.2109	71.6879
12.8189	-0.000186366		12.5968	0.0241183		53.2191	71.7473
12.8271	-8.82318e-05		12.605	0.0232989		53.2273	71.5495
12.8352	-3.99095e-05		12.6131	0.0227607		53.2354	71.4708
12.8434	-4.18736e-05		12.6213	0.0222225		53.2436	71.4163
12.8516	-4.38377e-05		12.6295	0.0207798		53.2518	71.3602
12.8598	-6.9832e-05		12.6377	0.0232951		53.26	71.3682
12.868	-0.000143887		12.6459	0.0232485		53.2682	71.3791
12.8762	-0.000349579		12.6541	0.023202		53.2764	71.3884
12.8844	-0.000346773		12.6623	0.0230952		53.2846	71.3313
12.8926	-0.00018351		12.6705	0.0216691		53.2928	71.3872
12.9008	-0.00017284		12.6787	0.0216936		53.301	71.0976
12.909	-0.000156098		12.6869	0.0216345		53.3092	70.8636
12.9171	-0.000143633		12.695	0.0215754		53.3173	71.333
12.9253	-0.000138061		12.7032	0.0214548		53.3255	71.369
12.9335	-0.000138692		12.7114	0.022598		53.3337	71.3473
12.9417	-0.000139323		12.7196	0.0231633		53.3419	71.3409
12.9499	-0.000177553		12.7278	0.023382		53.3501	71.24
12.9581	-0.000386369		12.736	0.0233635		53.3583	71.3774
12.9663	-0.000316267		12.7442	0.023345		53.3665	71.2915
12.9745	-0.000274304		12.7524	0.0217622		53.3747	71.4719
12.9827	-0.00023234		12.7606	0.0246523		53.3829	71.5284
12.9908	-0.000225286		12.7688	0.0246936		53.3911	71.7893
12.999	-0.000221753		12.7769	0.0246082		53.3992	71.8415
13.0072	-0.000220131		12.7851	0.0245228		53.4074	71.8466
13.0154	-0.000221041		12.7933	0.0240899		53.4156	71.8939
13.0236	-0.00022195		12.8015	0.0242167		53.4238	72.0034
13.0318	-0.000224132		12.8097	0.0242231		53.432	71.9055
13.04	-0.000206477		12.8179	0.0242049		53.4402	71.813
13.0482	-0.000199102		12.8261	0.0241866		53.4484	71.4867
13.0564	-0.000201309		12.8343	0.0231141		53.4566	71.653
13.0646	-0.000203516		12.8425	0.023401		53.4648	71.7742
13.0727	-0.000228892		12.8506	0.023294		53.473	71.9177
13.0809	-0.00028144		12.8588	0.0231869		53.4811	72.2322
13.0891	-0.000391542		12.867	0.022946		53.4893	72.0863
13.0973	-0.000372545		12.8752	0.020767		53.4975	71.9318
13.1055	-0.000288686		12.8834	0.0181714		53.5057	71.9185
13.1137	-0.000282764		12.8916	0.022775		53.5139	71.9037
13.1219	-0.000329436		12.8998	0.0230401		53.5221	71.6978
13.1301	-0.000376108		12.908	0.0231397		53.5303	71.413
13.1383	-0.000471		12.9162	0.023093		53.5385	72.0298
13.1465	-0.000495905		12.9244	0.0230463		53.5467	72.2113
13.1546	-0.000134754		12.9325	0.0226524		53.5549	72.0689
13.1628	-6.69352e-05		12.9407	0.0207002		53.563	72.0154
13.171	8.8397e-07		12.9489	0.0215368		53.5712	71.9732
13.1792	0.000229765		12.9571	0.0216156		53.5794	71.9121
13.1874	0.000343086		12.9653	0.0216483		53.5876	72.0277
13.1956	0.000362915		12.9735	0.021681		53.5958	72.0586
13.2038	0.000366547		12.9817	0.0235847		53.604	72.0415
13.212	5.00171e-05		12.9899	0.0241336		53.6122	72.0732
13.2202	-0.000266512		12.9981	0.0242383		53.6204	72.0617
13.2284	-0.000522537		13.0063	0.0242899		53.6286	72.0809
13.2365	-0.000312574		13.0144	0.0242937		53.6367	71.9165
13.2447	-0.000209421		13.0226	0.0241175		53.6449	71.8956
13.2529	-0.00019064		13.0308	0.0239414		53.6531	72.0264
13.2611	-0.000171858		13.039	0.0213493		53.6613	72.0646
13.2693	-9.26045e-05		13.0472	0.0202728		53.6695	72.0792
13.2775	-6.0192e-05		13.0554	0.0197151		53.6777	72.072
13.2857	-5.38309e-05		13.0636	0.0191573		53.6859	72.2944
13.2939	-7.44411e-05		13.0718	0.021055		53.6941	72.3846
13.3021	-9.50513e-05		13.08	0.0226491		53.7023	72.4749
13.3103	-0.000138988		13.0882	0.0233818		53.7105	72.3673
13.3184	-0.000153289		13.0963	0.0234452		53.7186	72.5335
13.3266	-0.00016759		13.1045	0.0233893		53.7268	72.5825
13.3348	-0.000218626		13.1127	0.0233334		53.735	72.5348
13.343	-0.000272049		13.1209	0.0219813		53.7432	72.5325
13.3512	-0.00031895		13.1291	0.0206549		53.7514	72.6062
13.3594	-0.000289841		13.1373	0.0203693		53.7596	72.4227
13.3676	-0.000194035		13.1455	0.0200895		53.7678	72.4471
13.3758	-8.44122e-05		13.1537	0.0198096		53.776	72.5206
13.384	-7.70237e-05		13.1619	0.0183784		53.7842	72.5291
13.3921	-9.12025e-05		13.1701	0.0178308		53.7924	72.5377
13.4003	-0.000105381		13.1782	0.0210518		53.8005	72.7749
13.4085	-0.000187462		13.1864	0.0217421		53.8087	72.8241
13.4167	-0.000395104		13.1946	0.0218378		53.8169	72.6735
13.4249	-0.000377431		13.2028	0.0218217		53.8251	72.5431
13.4331	-0.000261095		13.211	0.0218057		53.8333	72.8275
13.4413	-0.000253173		13.2192	0.0204336		53.8415	72.5898
13.4495	-0.000249882		13.2274	0.0190614		53.8497	72.7869
13.4577	-0.000246591		13.2356	0.0164486		53.8579	72.7497
13.4659	-0.000214547		13.2438	0.0176141		53.8661	72.7259
13.474	-0.000199		13.2519	0.0187797		53.8743	72.7129
13.4822	-0.000183454		13.2601	0.0190716		53.8824	72.6922
13.4904	-0.000165781		13.2683	0.0198509		53.8906	73.0963
13.4986	-0.000165587		13.2765	0.0198571		53.8988	72.7188
13.5068	-0.000166628		13.2847	0.0198512		53.907	72.5988
13.515	-0.000167669		13.2929	0.0198453		53.9152	72.557
13.5232	-0.000174882		13.3011	0.0196504		53.9234	72.4345
13.5314	-0.000193046		13.3093	0.0191983		53.9316	72.4561
13.5396	-0.000223006		13.3175	0.0163466		53.9398	72.4545
13.5478	-0.000223986		13.3257	0.0198707		53.948	72.4494
13.5559	-0.000224966		13.3338	0.0201284		53.9562	72.3693
13.5641	-0.000241831		13.342	0.0203861		53.9643	72.7443
13.5723	-0.000229077		13.3502	0.0203248		53.9725	73.0027
13.5805	-0.000223694		13.3584	0.0202634		53.9807	73.1513
13.5887	-0.000228132		13.3666	0.0199852		53.9889	73.3004
13.5969	-0.000232569		13.3748	0.019366		53.9971	73.3374
13.6051	-0.000347668		13.383	0.0192506		54.0053	73.3688
13.6133	-0.00031341		13.3912	0.0191352		54.0135	73.3721
13.6215	-0.000297084		13.3994	0.0186691		54.0217	73.5341
13.6297	-0.00029889		13.4076	0.0168256		54.0299	73.7487
13.6378	-0.000300697		13.4157	0.0170182		54.038	73.3898
13.646	-0.000304481		13.4239	0.017029		54.0462	73.3256
13.6542	-0.000323908		13.4321	0.0170397		54.0544	73.2718
13.6624	-0.000255021		13.4403	0.0196489		54.0626	73.218
13.6706	-0.000130374		13.4485	0.0209431		54.0708	73.2024
13.6788	-0.000128955		13.4567	0.0210929		54.079	73.0656
13.687	-0.000127536		13.4649	0.021025		54.0872	73.0641
13.6952	-0.000136312		13.4731	0.0209572		54.0954	73.1202
13.7034	-0.000145089		13.4813	0.0204646		54.1036	73.2285
13.7116	-0.00016302		13.4895	0.0188713		54.1118	73.23
13.7197	-0.000248289		13.4976	0.0196992		54.1199	73.3271
13.7279	-0.000180948		13.5058	0.0207803		54.1281	73.4845
13.7361	-0.000122261		13.514	0.0212947		54.1363	73.5721
13.7443	-8.68029e-05		13.5222	0.0212821		54.1445	73.6017
13.7525	-8.42473e-05		13.5304	0.0212694		54.1527	73.5982
13.7607	-8.41589e-05		13.5386	0.0210406		54.1609	73.54
13.7689	-0.000100866		13.5468	0.0183309		54.1691	73.4942
13.7771	-0.000117573		13.555	0.019801		54.1773	73.4827
13.7853	-0.000267784		13.5632	0.0202594		54.1855	73.4184
13.7934	-0.000218213		13.5714	0.0207178		54.1937	73.0445
13.8016	-0.000215682		13.5795	0.0210895		54.2018	72.8125
13.8098	-0.00021315		13.5877	0.0211166		54.21	72.9245
13.818	-0.000180729		13.5959	0.0195239		54.2182	72.9162
13.8262	-0.000168682		13.6041	0.0179313		54.2264	72.9086
13.8344	-0.000176403		13.6123	0.0147459		54.2346	73.3343
13.8426	-0.000184124		13.6205	0.016728		54.2428	73.5378
13.8508	-0.000348951		13.6287	0.0170209		54.251	73.5173
13.859	-0.000435713		13.6369	0.0170272		54.2592	73.5439
13.8672	-0.000419273		13.6451	0.0166652		54.2674	73.5987
13.8753	-0.000221797		13.6532	0.0163033		54.2756	73.6325
13.8835	-0.000159362		13.6614	0.0175112		54.2837	73.629
13.8917	-0.000147029		13.6696	0.0179436		54.2919	73.5743
13.8999	-0.000143562		13.6778	0.0176075		54.3001	73.2976
13.9081	-0.000148957		13.686	0.0172714		54.3083	73.7323
13.9163	-0.000154351		13.6942	0.0150499		54.3165	73.7657
13.9245	-0.000168608		13.7024	0.0144142		54.3247	73.7267
13.9327	-0.000208104		13.7106	0.0176041		54.3329	73.7376
13.9409	5.577e-05		13.7188	0.0182359		54.3411	73.8519
13.9491	6.01988e-05		13.727	0.0185404		54.3493	73.8183
13.9572	4.67097e-06		13.7351	0.0188449		54.3575	73.7899
13.9654	-5.08569e-05		13.7433	0.0191904		54.3656	73.7271
13.9736	-0.000303536		13.7515	0.0192597		54.3738	73.7185
13.9818	-0.000362429		13.7597	0.0192876		54.382	73.7374
13.99	-0.000287016		13.7679	0.0192783		54.3902	73.6063
13.9982	-0.000269605		13.7761	0.019269		54.3984	73.345
14.0064	-0.000252194		13.7843	0.0186041		54.4066	73.7055
14.0146	-0.000218141		13.7925	0.0162437		54.4148	73.8848
14.0228	-0.000211234		13.8007	0.0143627		54.423	73.6704
14.031	-0.000204328		13.8089	0.0145304		54.4312	73.7352
14.0391	-4.42835e-05		13.817	0.0143439		54.4393	73.7648
14.0473	5.44361e-06		13.8252	0.0141575		54.4475	73.8238
14.0555	-5.6194e-06		13.8334	0.0130034		54.4557	73.6853
14.0637	-1.66824e-05		13.8416	0.0147677		54.4639	73.6632
14.0719	-5.36582e-05		13.8498	0.0162926		54.4721	73.6354
14.0801	-0.000133927		13.858	0.0168979		54.4803	73.63
14.0883	1.30893e-05		13.8662	0.0175032		54.4885	73.7028
14.0965	1.99001e-05		13.8744	0.0190654		54.4967	73.9969
14.1047	-1.65582e-05		13.8826	0.0206276		54.5049	74.2656
14.1128	-5.30166e-05		13.8908	0.0206253		54.5131	73.7153
14.121	-0.000127697		13.8989	0.020623		54.5212	74.0159
14.1292	-0.000347856		13.9071	0.0206043		54.5294	74.2901
14.1374	-0.000365923		13.9153	0.0191216		54.5376	74.3771
14.1456	-0.000383991		13.9235	0.0185605		54.5458	74.3989
14.1538	-0.000421054		13.9317	0.0183749		54.554	74.4026
14.162	-0.000492365		13.9399	0.0181892		54.5622	74.4661
14.1702	-0.000323098		13.9481	0.0170496		54.5704	74.5268
14.1784	-2.17871e-05		13.9563	0.0172395		54.5786	74.791
14.1866	0.00177262		13.9645	0.0172362		54.5868	74.3637
14.1947	0.00168731		13.9726	0.0172329		54.595	74.1342
14.2029	0.00160201		13.9808	0.0172275		54.6031	74.1681
14.2111	0.00135244		13.989	0.0159728		54.6113	74.2022
14.2193	8.30419e-05		13.9972	0.0153849		54.6195	74.1199
14.2275	-9.45219e-05		14.0054	0.0174122		54.6277	73.9013
14.2357	-0.000185609		14.0136	0.0186103		54.6359	74.1644
14.2439	-0.00021644		14.0218	0.0186888		54.6441	74.6946
14.2521	-0.000247271		14.03	0.0186466		54.6523	74.7029
14.2603	-0.000369547		14.0382	0.0186045		54.6605	74.6654
14.2685	-0.000455523		14.0464	0.0181603		54.6687	74.6407
14.2766	-0.00033709		14.0545	0.0172537		54.6769	74.5598
14.2848	-0.000266116		14.0627	0.0158481		54.685	74.3177
14.293	-0.000233461		14.0709	0.0164249		54.6932	74.0784
14.3012	-0.000251075		14.0791	0.0165111		54.7014	74.0586
14.3094	-0.00026869		14.0873	0.0164987		54.7096	74.3179
14.3176	-0.000313266		14.0955	0.0164863		54.7178	74.4264
14.3258	-0.000408027		14.1037	0.0162218		54.726	74.5183
14.334	-0.000351225		14.1119	0.0171327		54.7342	74.7444
14.3422	-0.000254966		14.1201	0.0172609		54.7424	74.8019
14.3504	-0.000248455		14.1283	0.0172921		54.7506	74.7818
14.3585	-0.000260748		14.1364	0.0171993		54.7587	74.7617
14.3667	-0.000273041		14.1446	0.0171066		54.7669	74.6591
14.3749	-0.000532209		14.1528	0.0171041		54.7751	74.443
14.3831	-4.77364e-05		14.161	0.0171015		54.7833	74.7944
14.3913	-4.17636e-05		14.1692	0.0170725		54.7915	74.918
14.3995	-3.57907e-05		14.1774	0.0170044		54.7997	74.8842
14.4077	-1.97083e-05		14.1856	0.0168586		54.8079	74.8841
14.4159	-3.37317e-05		14.1938	0.0178628		54.8161	74.7661
14.4241	-4.77552e-05		14.202	0.0189747		54.8243	75.0085
14.4323	-7.8718e-05		14.2102	0.0189826		54.8325	74.8661
14.4404	-0.000220376		14.2183	0.0189852		54.8406	74.8805
14.4486	-0.000330565		14.2265	0.0189879		54.8488	74.8707
14.4568	-0.000205826		14.2347	0.0191392		54.857	74.8053
14.465	2.12372e-05		14.2429	0.0192137		54.8652	74.8417
14.4732	0.000133634		14.2511	0.0192478		54.8734	74.7671
14.4814	0.000187165		14.2593	0.0192136		54.8816	74.6705
14.4896	0.000195942		14.2675	0.0191793		54.8898	74.9021
14.4978	9.62943e-05		14.2757	0.0190767		54.898	74.9605
14.506	-3.35379e-06		14.2839	0.0182312		54.9062	74.9781
14.5141	-0.000209335		14.2921	0.0153944		54.9144	75.0289
14.5223	-0.000250869		14.3002	0.0152502		54.9225	75.1345
14.5305	-0.000149907		14.3084	0.0155405		54.9307	75.395
14.5387	-0.000100192		14.3166	0.017441		54.9389	75.5824
14.5469	-0.000108379		14.3248	0.0183823		54.9471	75.58
14.5551	-0.000116567		14.333	0.0185856		54.9553	75.6664
14.5633	-0.000142565		14.3412	0.0186679		54.9635	75.7801
14.5715	-4.5086e-05		14.3494	0.0185878		54.9717	75.7653
14.5797	-3.82934e-05		14.3576	0.0185077		54.9799	75.7678
14.5879	-3.53864e-05		14.3658	0.0185034		54.9881	75.7896
14.596	-0.000104642		14.3739	0.018499		54.9963	75.4887
14.6042	-0.000173898		14.3821	0.0184419		55.0044	75.2505
14.6124	-2.5843e-05		14.3903	0.0160891		55.0126	75.5548
14.6206	-3.16063e-05		14.3985	0.0160788		55.0208	75.5546
14.6288	-3.73697e-05		14.4067	0.0160723		55.029	75.518
14.637	-5.42635e-05		14.4149	0.0160657		55.0372	75.4559
14.6452	-0.000151608		14.4231	0.0160539		55.0454	75.4298
14.6534	-0.000205254		14.4313	0.0160905		55.0536	75.3188
14.6616	-0.0002589		14.4395	0.0160497		55.0618	75.3109
14.6698	-0.000454353		14.4477	0.016009		55.07	75.3335
14.6779	-0.000449892		14.4558	0.0159201		55.0782	75.3275
14.6861	-0.000460187		14.464	0.0131392		55.0863	75.3451
14.6943	-0.000470481		14.4722	0.0110771		55.0945	75.4767
14.7025	-0.000492188		14.4804	0.0110665		55.1027	75.601
14.7107	-0.00051696		14.4886	0.0110559		55.1109	75.6935
14.7189	-0.000541733		14.4968	0.0109481		55.1191	75.5586
14.7271	-0.000486047		14.505	0.0108404		55.1273	75.5598
14.7353	-0.000241871		14.5132	0.00931603		55.1355	75.6992
14.7435	-0.000102498		14.5214	0.0116871		55.1437	75.7433
14.7517	5.08399e-05		14.5296	0.0118531		55.1519	75.7578
14.7598	0.000118399		14.5377	0.0129477		55.16	75.8703
14.768	0.000121645		14.5459	0.014674		55.1682	75.6221
14.7762	6.9956e-05		14.5541	0.0147521		55.1764	75.677
14.7844	1.82675e-05		14.5623	0.0147775		55.1846	75.6211
14.7926	-8.62127e-05		14.5705	0.0148029		55.1928	75.6279
14.8008	-0.000217589		14.5787	0.015731		55.201	75.6032
14.809	-0.00023703		14.5869	0.0159351		55.2092	75.3937
14.8172	-0.000243177		14.5951	0.0160266		55.2174	75.8564
14.8254	-0.000249323		14.6033	0.0159981		55.2256	75.9514
14.8336	-0.000264154		14.6115	0.0159696		55.2338	75.9404
14.8417	-0.000401354		14.6196	0.0155662		55.2419	76.0238
14.8499	-0.000352816		14.6278	0.0155591		55.2501	75.9445
14.8581	-0.000315534		14.636	0.0155519		55.2583	75.3936
14.8663	-0.00031141		14.6442	0.0154948		55.2665	75.4895
14.8745	-0.000307285		14.6524	0.0151528		55.2747	75.8436
14.8827	-0.000303354		14.6606	0.0147608		55.2829	75.7783
14.8909	-0.000305434		14.6688	0.0149414		55.2911	75.766
14.8991	-0.000307515		14.677	0.0153548		55.2993	75.8252
14.9073	-0.000324234		14.6852	0.0154915		55.3075	75.7965
14.9154	-0.000296366		14.6934	0.0153656		55.3157	76.5817
14.9236	-0.000288041		14.7015	0.0152398		55.3238	76.629
14.9318	-0.000301559		14.7097	0.0144404		55.332	76.6042
14.94	-0.000315078		14.7179	0.0146005		55.3402	76.5886
14.9482	-0.000387304		14.7261	0.0146531		55.3484	76.5361
14.9564	-0.000318176		14.7343	0.0170069		55.3566	76.1786
14.9646	-0.000285056		14.7425	0.0179145		55.3648	76.1775
14.9728	-0.000282569		14.7507	0.0178161		55.373	76.3625
14.981	-0.000311295		14.7589	0.0177177		55.3812	76.4568
14.9892	-0.000340021		14.7671	0.0174468		55.3894	76.3305
14.9973	-6.24171e-05		14.7752	0.0158486		55.3976	76.1727
15.0055	4.12556e-05		14.7834	0.0124845		55.4057	75.5671
15.0137	0.000405417		14.7916	0.0128357		55.4139	75.4634
15.0219	0.000491783		14.7998	0.0128582		55.4221	76.1036
15.0301	0.000474562		14.808	0.0128807		55.4303	76.4574
15.0383	0.000457341		14.8162	0.0135231		55.4385	76.539
15.0465	0.000421425		14.8244	0.0141655		55.4467	76.546
15.0547	0.000349007		14.8326	0.0145357		55.4549	76.6421
15.0629	0.000203587		14.8408	0.015641		55.4631	76.5305
15.0711	-0.000108114		14.849	0.0159326		55.4713	76.5041
15.0792	-0.000202329		14.8571	0.0160694		55.4795	76.4961
15.0874	-0.000113405		14.8653	0.0160193		55.4876	76.5013
15.0956	-0.000111697		14.8735	0.0159693		55.4958	76.5446
15.1038	-0.000115487		14.8817	0.014236		55.504	76.7128
15.112	-0.000119277		14.8899	0.0142284		55.5122	76.791
15.1202	-0.000138521		14.8981	0.0142209		55.5204	76.9061
15.1284	-0.000194589		14.9063	0.0141211		55.5286	76.9549
15.1366	-8.47048e-05		14.9145	0.0133764		55.5368	77.1739
15.1448	1.48708e-05		14.9227	0.0117111		55.545	77.0597
15.153	0.000216055		14.9309	0.0119045		55.5532	76.866
15.1611	0.000270167		14.939	0.0126314		55.5613	76.5579
15.1693	0.000267819		14.9472	0.012957		55.5695	76.25
15.1775	0.00026547		14.9554	0.0132827		55.5777	76.7613
15.1857	0.000105954		14.9636	0.015357		55.5859	76.7359
15.1939	8.28696e-05		14.9718	0.0156617		55.5941	76.6902
15.2021	5.97855e-05		14.98	0.0157271		55.6023	77.0826
15.2103	-4.09215e-05		14.9882	0.0157327		55.6105	77.2222
15.2185	-0.00032775		14.9964	0.0157289		55.6187	77.2837
15.2267	-0.000284789		15.0046	0.0157252		55.6269	76.6941
15.2349	-0.000272766		15.0128	0.0149331		55.6351	76.8341
15.243	-0.000268323		15.0209	0.0157499		55.6432	76.6391
15.2512	-0.00026388		15.0291	0.0161388		55.6514	76.4452
15.2594	-0.000226533		15.0373	0.0158224		55.6596	76.8345
15.2676	-0.000207939		15.0455	0.0155061		55.6678	76.7977
15.2758	-0.00019916		15.0537	0.0147684		55.676	76.8175
15.284	-0.000190382		15.0619	0.0130356		55.6842	76.8481
15.2922	-0.000147149		15.0701	0.0129901		55.6924	76.8079
15.3004	-0.000126352		15.0783	0.00880887		55.7006	76.874
15.3086	-0.000132797		15.0865	0.0130223		55.7088	76.9564
15.3167	-0.000139242		15.0946	0.0144118		55.717	76.5803
15.3249	-0.000161711		15.1028	0.0149579		55.7251	76.8385
15.3331	-0.000208604		15.111	0.014824		55.7333	76.8167
15.3413	-0.000222565		15.1192	0.0146901		55.7415	76.8053
15.3495	-0.000236526		15.1274	0.0129631		55.7497	76.7159
15.3577	-0.000354714		15.1356	0.013573		55.7579	76.4391
15.3659	-0.000523857		15.1438	0.0139471		55.7661	77.0425
15.3741	-0.000434614		15.152	0.0141359		55.7743	77.1033
15.3823	-0.000186466		15.1602	0.0143248		55.7825	77.0931
15.3905	-6.24571e-05		15.1684	0.0144327		55.7907	77.0171
15.3986	-4.09449e-05		15.1765	0.015575		55.7989	76.8779
15.4068	-7.32521e-05		15.1847	0.0161403		55.807	76.9552
15.415	-0.000105559		15.1929	0.015755		55.8152	77.0186
15.4232	-0.000177194		15.2011	0.0153698		55.8234	77.0406
15.4314	-9.97219e-05		15.2093	0.0144022		55.8316	77.0745
15.4396	-1.51885e-05		15.2175	0.0114327		55.8398	77.1216
15.4478	6.93448e-05		15.2257	0.0114748		55.848	77.1562
15.456	0.000111436		15.2339	0.0114712		55.8562	77.5916
15.4642	0.000136441		15.2421	0.0114677		55.8644	77.7068
15.4724	0.00014773		15.2503	0.0114445		55.8726	77.4509
15.4805	0.000150146		15.2584	0.0124925		55.8808	77.3801
15.4887	0.000133372		15.2666	0.0155259		55.8889	77.429
15.4969	0.000116597		15.2748	0.0164852		55.8971	77.5662
15.5051	8.06313e-05		15.283	0.0164313		55.9053	77.3072
15.5133	-0.00012659		15.2912	0.0163773		55.9135	77.0406
15.5215	-0.000129737		15.2994	0.0158128		55.9217	77.0359
15.5297	-0.000132884		15.3076	0.0145756		55.9299	77.2412
15.5379	-0.000160621		15.3158	0.0136677		55.9381	77.2809
15.5461	-1.66686e-06		15.324	0.0133727		55.9463	77.3029
15.5543	1.80323e-06		15.3322	0.0130777		55.9545	77.2491
15.5624	5.27332e-06		15.3403	0.0117258		55.9626	77.368
15.5706	0.000124031		15.3485	0.0132985		55.9708	77.6711
15.5788	0.000118555		15.3567	0.0132657		55.979	77.7242
15.587	0.000113079		15.3649	0.0132328		55.9872	77.9036
15.5952	8.78422e-05		15.3731	0.0128861		55.9954	78.0308
15.6034	3.31602e-05		15.3813	0.0120987		56.0036	78.0605
15.6116	-4.65315e-06		15.3895	0.0104792		56.0118	78.0698
15.6198	-4.24665e-05		15.3977	0.0105304		56.02	78.0779
15.628	-0.000544247		15.4059	0.0114019		56.0282	77.4895
15.6361	-0.000403716		15.4141	0.0116978		56.0364	77.4952
15.6443	-0.000115244		15.4222	0.0119937		56.0445	77.3762
15.6525	-0.000115057		15.4304	0.0134069		56.0527	77.4191
15.6607	-0.000115888		15.4386	0.0140916		56.0609	77.4438
15.6689	-0.00011672		15.4468	0.0141646		56.0691	77.4662
15.6771	-0.000129777		15.455	0.0141604		56.0773	77.5659
15.6853	-0.000141606		15.4632	0.0141562		56.0855	77.7308
15.6935	-0.000153434		15.4714	0.0138873		56.0937	77.9185
15.7017	-0.000272089		15.4796	0.0133048		56.1019	78.116
15.7099	-0.000199889		15.4878	0.0146094		56.1101	78.0581
15.718	9.11063e-05		15.4959	0.0149091		56.1183	78.0637
15.7262	8.18291e-05		15.5041	0.0150434		56.1264	78.0863
15.7344	7.25518e-05		15.5123	0.014986		56.1346	78.1032
15.7426	4.83581e-05		15.5205	0.0149286		56.1428	77.851
15.7508	-1.8186e-06		15.5287	0.011922		56.151	78.1286
15.759	-0.000126694		15.5369	0.0130822		56.1592	78.3086
15.7672	-0.000210542		15.5451	0.0130728		56.1674	78.4006
15.7754	-0.000295528		15.5533	0.0130635		56.1756	78.264
15.7836	-0.000380515		15.5615	0.0129232		56.1838	78.2074
15.7918	-0.000119397		15.5697	0.0126376		56.192	78.1806
15.7999	-8.56362e-05		15.5778	0.0111779		56.2002	78.1589
15.8081	-0.000100868		15.586	0.00782712		56.2083	78.117
15.8163	-0.0001161		15.5942	0.0113177		56.2165	78.1033
15.8245	-0.00014985		15.6024	0.01244		56.2247	78.1637
15.8327	-0.00010058		15.6106	0.0135622		56.2329	78.2322
15.8409	1.59673e-05		15.6188	0.0138057		56.2411	78.2056
15.8491	2.38855e-05		15.627	0.0139222		56.2493	78.2241
15.8573	2.74541e-05		15.6352	0.013953		56.2575	78.4053
15.8655	3.10228e-05		15.6434	0.0139838		56.2657	78.3584
15.8737	3.45771e-05		15.6516	0.0142386		56.2739	78.3635
15.8818	3.33667e-05		15.6597	0.0155052		56.282	78.3663
15.89	3.21563e-05		15.6679	0.0157371		56.2902	78.4032
15.8982	1.96497e-05		15.6761	0.0158524		56.2984	78.7334
15.9064	-5.91976e-06		15.6843	0.0158255		56.3066	78.4967
15.9146	-8.26595e-05		15.6925	0.0157986		56.3148	78.3872
15.9228	-0.000190855		15.7007	0.0143078		56.323	78.3415
15.931	-0.000292408		15.7089	0.00895325		56.3312	78.3173
15.9392	-0.000267624		15.7171	0.00885878		56.3394	78.3397
15.9474	-0.00025798		15.7253	0.00876432		56.3476	78.3409
15.9556	-0.00025553		15.7335	0.008329		56.3558	78.4239
15.9637	-0.00025308		15.7416	0.00735932		56.3639	78.5209
15.9719	-0.00022277		15.7498	0.00909205		56.3721	78.548
15.9801	-0.000183299		15.758	0.00928714		56.3803	78.5299
15.9883	-3.5585e-05		15.7662	0.00875164		56.3885	78.5105
15.9965	-8.8797e-05		15.7744	0.00821613		56.3967	78.5054
16.0047	-0.000142009		15.7826	0.00710257		56.4049	78.4337
16.0129	-0.000267924		15.7908	0.0103893		56.4131	78.619
16.0211	-0.000315708		15.799	0.0113454		56.4213	78.7041
16.0293	-0.000318213		15.8072	0.0117583		56.4295	78.6963
16.0374	-0.000320718		15.8154	0.0117758		56.4377	78.6818
16.0456	-0.000326112		15.8235	0.0117933		56.4458	78.4577
16.0538	-0.000388488		15.8317	0.0133096		56.454	78.4554
16.062	-0.000391409		15.8399	0.0144843		56.4622	78.5022
16.0702	-0.00039433		15.8481	0.0145305		56.4704	78.6439
16.0784	-0.000165627		15.8563	0.0145254		56.4786	78.5464
16.0866	-0.00015061		15.8645	0.0145203		56.4868	79.123
16.0948	-0.000135594		15.8727	0.0144987		56.495	79.3642
16.103	-5.42611e-05		15.8809	0.0143834		56.5032	79.4462
16.1112	-1.8308e-05		15.8891	0.0126991		56.5114	79.4691
16.1193	1.76451e-05		15.8972	0.0088107		56.5196	79.694
16.1275	7.78304e-05		15.9054	0.0110927		56.5277	79.6769
[truncated: 10,819 more rows]

## Sheet: 4 d
Radius (nm)	Number Density (particles/mL)
49.3519	1169650
49.3504	1178660
49.3489	1187723
49.3475	1196838
49.3462	1206005
49.3449	1215225
49.3436	1224497
49.3425	1233823
49.3413	1243201
49.3403	1252632
49.3393	1262117
49.3383	1271656
49.3375	1281248
49.3366	1290894
49.3359	1300594
49.3351	1310348
49.3345	1320156
49.3339	1330019
49.3333	1339936
49.3328	1349908
49.3324	1359935
49.332	1370017
49.3316	1380154
49.3314	1390347
49.3311	1400595
49.331	1410899
49.3308	1421258
49.3308	1431674
49.3308	1442146
49.3308	1452674
49.3309	1463258
49.3311	1473899
49.3313	1484596
49.3315	1495351
49.3318	1506162
49.3322	1517031
49.3326	1527957
49.3331	1538940
49.3336	1549981
49.3342	1561080
49.3348	1572236
49.3355	1583450
49.3362	1594723
49.337	1606054
49.3378	1617443
49.3387	1628891
49.3396	1640397
49.3406	1651963
49.3416	1663587
49.3427	1675270
49.3438	1687013
49.345	1698814
49.3462	1710676
49.3475	1722597
49.3489	1734578
49.3502	1746618
49.3517	1758719
49.3531	1770880
49.3547	1783101
49.3563	1795382
49.3579	1807724
49.3596	1820127
49.3613	1832590
49.3631	1845114
49.3649	1857700
49.3667	1870346
49.3686	1883054
49.3706	1895823
49.3726	1908653
49.3747	1921545
49.3768	1934499
49.3789	1947515
49.3811	1960593
49.3834	1973733
49.3856	1986935
49.388	2000199
49.3904	2013526
49.3928	2026915
49.3953	2040367
49.3978	2053881
49.4004	2067459
49.403	2081099
49.4056	2094803
49.4083	2108570
49.4111	2122400
49.4139	2136293
49.4167	2150250
49.4196	2164271
49.4225	2178355
49.4255	2192503
49.4285	2206715
49.4316	2220991
49.4346	2235331
49.4378	2249735
49.441	2264203
49.4442	2278736
49.4475	2293333
49.4508	2307995
49.4542	2322722
49.4576	2337513
49.461	2352369
49.4645	2367290
49.468	2382276
49.4716	2397327
49.4752	2412444
49.4789	2427625
49.4826	2442872
49.4863	2458184
49.4901	2473562
49.4939	2489006
49.4978	2504515
49.5017	2520090
49.5057	2535730
49.5097	2551437
49.5137	2567210
49.5177	2583048
49.5219	2598953
49.526	2614924
49.5302	2630961
49.5344	2647064
49.5387	2663234
49.543	2679471
49.5474	2695773
49.5517	2712143
49.5562	2728579
49.5607	2745082
49.5652	2761651
49.5697	2778288
49.5743	2794991
49.5789	2811761
49.5836	2828599
49.5883	2845503
49.593	2862475
49.5978	2879513
49.6026	2896619
49.6075	2913792
49.6123	2931033
49.6173	2948341
49.6222	2965716
49.6272	2983159
49.6323	3000669
49.6374	3018247
49.6425	3035892
49.6476	3053605
49.6528	3071386
49.658	3089234
49.6633	3107150
49.6686	3125134
49.6739	3143186
49.6793	3161306
49.6847	3179493
49.6902	3197749
49.6956	3216072
49.7011	3234464
49.7067	3252923
49.7123	3271450
49.7179	3290046
49.7235	3308710
49.7292	3327441
49.7349	3346241
49.7407	3365109
49.7465	3384045
49.7523	3403050
49.7582	3422122
49.7641	3441263
49.77	3460472
49.776	3479750
49.782	3499095
49.788	3518509
49.7941	3537991
49.8002	3557541
49.8063	3577160
49.8124	3596847
49.8186	3616603
49.8249	3636426
49.8311	3656318
49.8374	3676278
49.8438	3696307
49.8501	3716404
49.8565	3736569
49.8629	3756803
49.8694	3777104
49.8759	3797475
49.8824	3817913
49.889	3838420
49.8955	3858994
49.9021	3879638
49.9088	3900349
49.9155	3921129
49.9222	3941977
49.9289	3962893
49.9357	3983877
49.9425	4004929
49.9493	4026050
49.9562	4047238
49.9631	4068495
49.97	4089820
49.977	4111212
49.9839	4132673
49.9909	4154202
49.998	4175799
50.0051	4197463
50.0122	4219196
50.0193	4240996
50.0265	4262864
50.0337	4284800
50.0409	4306804
50.0481	4328875
50.0554	4351014
50.0627	4373221
50.07	4395495
50.0774	4417837
50.0848	4440246
50.0922	4462723
50.0997	4485267
50.1071	4507878
50.1146	4530557
50.1222	4553303
50.1297	4576116
50.1373	4598997
50.1449	4621944
50.1526	4644958
50.1602	4668040
50.1679	4691188
50.1757	4714403
50.1834	4737685
50.1912	4761034
50.199	4784449
50.2068	4807931
50.2147	4831479
50.2226	4855094
50.2305	4878775
50.2384	4902523
50.2464	4926336
50.2544	4950216
50.2624	4974162
50.2704	4998174
50.2785	5022252
50.2866	5046396
50.2947	5070606
50.3029	5094881
50.311	5119222
50.3192	5143628
50.3274	5168100
50.3357	5192637
50.344	5217240
50.3523	5241907
50.3606	5266640
50.3689	5291438
50.3773	5316301
50.3857	5341228
50.3941	5366220
50.4025	5391277
50.411	5416399
50.4195	5441584
50.428	5466834
50.4365	5492149
50.4451	5517527
50.4537	5542970
50.4623	5568476
50.4709	5594046
50.4796	5619680
50.4883	5645378
50.497	5671139
50.5057	5696963
50.5144	5722851
50.5232	5748802
50.532	5774816
50.5408	5800892
50.5496	5827032
50.5585	5853234
50.5674	5879499
50.5763	5905826
50.5852	5932216
50.5942	5958668
50.6031	5985182
50.6121	6011757
50.6211	6038395
50.6302	6065094
50.6392	6091855
50.6483	6118678
50.6574	6145561
50.6665	6172506
50.6757	6199512
50.6848	6226579
50.694	6253706
50.7032	6280894
50.7124	6308143
50.7217	6335452
50.731	6362821
50.7403	6390251
50.7496	6417740
50.7589	6445289
50.7682	6472898
50.7776	6500566
50.787	6528293
50.7964	6556080
50.8058	6583926
50.8153	6611831
50.8247	6639794
50.8342	6667816
50.8437	6695897
50.8533	6724035
50.8628	6752232
50.8724	6780487
50.882	6808800
50.8916	6837170
50.9012	6865598
50.9108	6894083
50.9205	6922626
50.9301	6951225
50.9398	6979881
50.9496	7008594
50.9593	7037364
50.969	7066190
50.9788	7095072
50.9886	7124010
50.9984	7153003
51.0082	7182053
51.0181	7211158
51.0279	7240318
51.0378	7269533
51.0477	7298804
51.0576	7328129
51.0675	7357509
51.0775	7386943
51.0875	7416432
51.0974	7445974
51.1074	7475571
51.1174	7505221
51.1275	7534924
51.1375	7564682
51.1476	7594492
51.1577	7624355
51.1678	7654271
51.1779	7684239
51.188	7714260
51.1982	7744333
51.2084	7774458
51.2185	7804635
51.2287	7834864
51.2389	7865144
51.2492	7895475
51.2594	7925858
51.2697	7956291
51.2799	7986775
51.2903	8017309
51.3006	8047894
51.3109	8078528
51.3212	8109213
51.3316	8139947
51.3419	8170730
51.3523	8201563
51.3627	8232445
51.3731	8263375
51.3836	8294355
51.394	8325382
51.4045	8356458
51.4149	8387582
51.4254	8418754
51.4359	8449973
51.4465	8481239
51.457	8512553
51.4675	8543914
51.4781	8575321
51.4887	8606775
51.4993	8638275
51.5099	8669822
51.5205	8701414
51.5311	8733052
51.5418	8764735
51.5524	8796463
51.5631	8828236
51.5738	8860055
51.5845	8891917
51.5952	8923824
51.6059	8955775
51.6166	8987770
51.6274	9019809
51.6382	9051891
51.6489	9084016
51.6597	9116184
51.6705	9148395
51.6814	9180648
51.6922	9212944
51.703	9245281
51.7139	9277661
51.7247	9310082
51.7356	9342544
51.7465	9375048
51.7574	9407592
51.7683	9440177
51.7793	9472802
51.7902	9505468
51.8011	9538174
51.8121	9570919
51.8231	9603703
51.8341	9636527
51.8451	9669390
51.8561	9702292
51.8671	9735232
51.8781	9768211
51.8892	9801227
51.9003	9834281
51.9113	9867373
51.9224	9900502
51.9335	9933668
51.9446	9966871
51.9557	10000111
51.9668	10033387
51.978	10066699
51.9891	10100046
52.0003	10133430
52.0115	10166848
52.0226	10200302
52.0338	10233791
52.045	10267314
52.0562	10300871
52.0675	10334463
52.0787	10368088
52.0899	10401747
52.1012	10435440
52.1124	10469165
52.1237	10502923
52.135	10536714
52.1463	10570537
52.1576	10604393
52.1689	10638280
52.1802	10672198
52.1915	10706148
52.2029	10740129
52.2142	10774141
52.2256	10808183
52.237	10842256
52.2483	10876358
52.2597	10910491
52.2711	10944653
52.2825	10978844
52.294	11013064
52.3054	11047312
52.3168	11081590
52.3282	11115895
52.3397	11150229
52.3512	11184590
52.3626	11218978
52.3741	11253394
52.3856	11287836
52.3971	11322306
52.4086	11356801
52.4201	11391323
52.4316	11425870
52.4432	11460444
52.4547	11495042
52.4662	11529665
52.4778	11564314
52.4893	11598986
52.5009	11633683
52.5125	11668404
52.5241	11703149
52.5357	11737917
52.5473	11772709
52.5589	11807523
52.5705	11842360
52.5821	11877219
52.5938	11912101
52.6054	11947004
52.617	11981929
52.6287	12016875
52.6403	12051843
52.652	12086831
52.6637	12121839
52.6754	12156868
52.6871	12191917
52.6988	12226986
52.7105	12262074
52.7222	12297181
52.7339	12332307
52.7456	12367451
52.7574	12402614
52.7691	12437795
52.7808	12472994
52.7926	12508210
52.8043	12543444
52.8161	12578695
52.8279	12613962
52.8397	12649246
52.8514	12684546
52.8632	12719862
52.875	12755193
52.8868	12790540
52.8987	12825902
52.9105	12861279
52.9223	12896671
52.9341	12932076
52.9459	12967496
52.9578	13002929
52.9696	13038376
52.9815	13073836
52.9933	13109309
53.0052	13144795
53.0171	13180292
53.0289	13215802
53.0408	13251324
53.0527	13286858
53.0646	13322402
53.0765	13357958
53.0884	13393524
53.1003	13429101
53.1122	13464688
53.1241	13500285
53.136	13535892
53.148	13571507
53.1599	13607132
53.1718	13642766
53.1838	13678409
53.1957	13714059
53.2077	13749718
53.2197	13785384
53.2316	13821058
53.2436	13856739
53.2555	13892426
53.2675	13928121
53.2795	13963822
53.2915	13999529
53.3035	14035241
53.3155	14070959
53.3275	14106683
53.3395	14142411
53.3515	14178145
53.3635	14213882
53.3755	14249624
53.3875	14285370
53.3996	14321119
53.4116	14356872
53.4236	14392627
53.4357	14428386
53.4477	14464147
53.4597	14499910
53.4718	14535676
53.4838	14571443
53.4959	14607211
53.508	14642981
53.52	14678752
53.5321	14714523
53.5442	14750294
53.5562	14786066
53.5683	14821838
53.5804	14857609
53.5925	14893379
53.6046	14929149
53.6166	14964917
53.6287	15000683
53.6409	15036448
53.6529	15072211
53.6651	15107971
53.6772	15143729
53.6893	15179484
53.7014	15215236
53.7135	15250985
53.7256	15286729
53.7377	15322470
53.7499	15358207
53.762	15393939
53.7741	15429667
53.7863	15465389
53.7984	15501106
53.8105	15536818
53.8227	15572524
53.8348	15608224
53.847	15643917
53.8591	15679604
53.8713	15715284
53.8834	15750957
53.8956	15786622
53.9078	15822280
53.9199	15857930
53.9321	15893572
53.9442	15929205
53.9564	15964829
53.9686	16000445
53.9808	16036051
53.9929	16071648
54.0051	16107235
54.0173	16142813
54.0295	16178379
54.0417	16213936
54.0538	16249481
54.066	16285016
54.0782	16320539
54.0904	16356050
54.1026	16391550
54.1148	16427038
54.127	16462513
54.1392	16497976
54.1514	16533426
54.1636	16568862
54.1758	16604286
54.188	16639696
54.2002	16675091
54.2124	16710473
54.2246	16745840
54.2368	16781193
54.2491	16816531
54.2613	16851853
54.2735	16887160
54.2857	16922452
54.2979	16957728
54.3102	16992987
54.3224	17028230
54.3346	17063456
54.3468	17098666
54.359	17133858
54.3713	17169033
54.3835	17204190
54.3957	17239329
54.4079	17274450
54.4202	17309553
54.4324	17344637
54.4446	17379702
54.4569	17414748
54.4691	17449774
54.4813	17484781
54.4936	17519768
54.5058	17554734
54.518	17589681
54.5303	17624606
54.5425	17659511
54.5547	17694395
54.567	17729257
54.5792	17764098
54.5915	17798917
54.6037	17833714
54.6159	17868488
54.6282	17903240
54.6404	17937969
54.6527	17972676
54.6649	18007358
54.6772	18042018
54.6894	18076653
54.7016	18111264
54.7139	18145852
54.7261	18180414
54.7384	18214953
54.7506	18249466
54.7629	18283954
54.7751	18318416
54.7874	18352853
54.7996	18387264
54.8118	18421649
54.8241	18456007
54.8363	18490339
54.8486	18524644
54.8608	18558922
54.873	18593173
54.8853	18627397
54.8975	18661592
54.9098	18695760
54.922	18729899
54.9343	18764010
54.9465	18798093
54.9588	18832146
54.971	18866171
54.9832	18900166
54.9955	18934131
55.0077	18968067
55.02	19001973
55.0322	19035849
55.0444	19069694
55.0567	19103508
55.0689	19137292
55.0812	19171045
55.0934	19204766
55.1056	19238456
55.1179	19272114
55.1301	19305740
55.1423	19339333
55.1546	19372895
55.1668	19406424
55.179	19439920
55.1913	19473382
55.2035	19506812
55.2157	19540208
55.2279	19573571
55.2402	19606899
55.2524	19640194
55.2646	19673454
55.2769	19706679
55.2891	19739870
55.3013	19773026
55.3135	19806147
55.3257	19839232
55.338	19872282
55.3502	19905295
55.3624	19938273
55.3746	19971215
55.3869	20004120
55.3991	20036989
55.4113	20069821
55.4235	20102616
55.4357	20135373
55.4479	20168093
55.4601	20200776
55.4723	20233421
55.4845	20266027
55.4967	20298596
55.5089	20331126
55.5211	20363617
55.5333	20396070
55.5455	20428483
55.5577	20460858
55.5699	20493192
55.5821	20525488
55.5943	20557743
55.6065	20589959
55.6187	20622134
55.6309	20654269
55.6431	20686363
55.6553	20718417
55.6675	20750429
55.6797	20782401
55.6918	20814331
55.704	20846219
55.7162	20878066
55.7284	20909871
55.7405	20941634
55.7527	20973354
55.7649	21005033
55.7771	21036668
55.7892	21068261
55.8014	21099810
55.8136	21131317
55.8257	21162780
55.8379	21194199
55.8501	21225575
55.8622	21256907
55.8744	21288194
55.8865	21319438
55.8987	21350637
55.9108	21381791
55.923	21412901
55.9351	21443965
55.9473	21474985
55.9594	21505959
55.9716	21536887
55.9837	21567770
55.9958	21598607
56.008	21629398
56.0201	21660143
56.0322	21690841
56.0444	21721493
56.0565	21752098
56.0686	21782656
56.0807	21813167
56.0928	21843631
56.105	21874048
56.1171	21904417
56.1292	21934738
56.1413	21965012
56.1534	21995237
56.1655	22025415
56.1776	22055543
56.1897	22085624
56.2018	22115655
56.2139	22145638
56.226	22175572
56.2381	22205457
56.2502	22235292
56.2623	22265078
56.2744	22294814
56.2865	22324500
56.2986	22354137
56.3107	22383723
56.3227	22413259
56.3348	22442745
56.3469	22472180
56.359	22501564
56.371	22530897
56.3831	22560180
56.3951	22589411
56.4072	22618591
56.4193	22647720
56.4313	22676796
56.4434	22705822
56.4554	22734795
56.4675	22763716
56.4795	22792585
56.4916	22821401
56.5036	22850165
56.5157	22878877
56.5277	22907536
56.5397	22936141
56.5517	22964694
56.5638	22993193
56.5758	23021640
56.5878	23050032
56.5999	23078371
56.6119	23106657
56.6239	23134888
56.6359	23163065
56.6479	23191189
56.6599	23219257
56.6719	23247272
56.6839	23275232
56.6959	23303137
56.7079	23330987
56.7199	23358783
56.7319	23386523
56.7439	23414208
56.7559	23441838
56.7679	23469412
56.7798	23496931
56.7918	23524394
56.8038	23551801
56.8158	23579152
56.8277	23606447
56.8397	23633685
56.8517	23660868
56.8636	23687993
56.8756	23715063
56.8875	23742075
56.8995	23769031
56.9115	23795929
56.9234	23822771
56.9353	23849555
56.9473	23876282
56.9592	23902952
56.9712	23929564
56.9831	23956118
56.995	23982615
57.007	24009053
57.0189	24035434
57.0308	24061756
57.0427	24088021
57.0546	24114226
57.0665	24140374
57.0785	24166463
57.0904	24192493
57.1023	24218464
57.1142	24244376
57.1261	24270229
57.138	24296024
57.1499	24321759
57.1617	24347434
57.1736	24373050
57.1855	24398607
57.1974	24424104
57.2093	24449541
57.2212	24474918
57.233	24500235
57.2449	24525493
57.2568	24550690
57.2686	24575826
57.2805	24600903
57.2923	24625919
57.3042	24650874
57.3161	24675769
57.3279	24700603
57.3398	24725376
57.3516	24750088
57.3634	24774739
57.3753	24799329
57.3871	24823857
57.3989	24848325
57.4108	24872731
57.4226	24897075
57.4344	24921358
57.4462	24945579
57.4581	24969738
57.4699	24993836
57.4817	25017871
57.4935	25041845
57.5053	25065756
57.5171	25089605
57.5289	25113392
57.5407	25137116
57.5525	25160778
57.5643	25184377
57.576	25207914
57.5878	25231388
57.5996	25254799
57.6114	25278147
57.6232	25301432
57.6349	25324654
57.6467	25347813
57.6585	25370909
57.6702	25393941
57.682	25416911
57.6937	25439816
57.7055	25462658
57.7172	25485437
57.729	25508152
57.7407	25530803
57.7525	25553390
57.7642	25575914
57.7759	25598373
57.7877	25620769
57.7994	25643100
57.8111	25665367
57.8228	25687570
57.8346	25709709
57.8463	25731783
57.858	25753793
57.8697	25775738
57.8814	25797619
57.8931	25819434
57.9048	25841186
57.9165	25862872
57.9282	25884494
57.9399	25906050
57.9516	25927542
57.9633	25948969
57.975	25970330
57.9866	25991627
57.9983	26012858
58.01	26034024
58.0217	26055125
58.0333	26076160
58.045	26097129
58.0566	26118034
58.0683	26138872
58.08	26159645
58.0916	26180352
58.1033	26200994
58.1149	26221570
58.1266	26242080
58.1382	26262524
58.1498	26282902
58.1615	26303214
58.1731	26323459
58.1847	26343639
58.1964	26363753
58.208	26383800
58.2196	26403782
58.2312	26423697
58.2428	26443545
58.2544	26463327
58.266	26483043
58.2777	26502692
58.2893	26522275
58.3009	26541791
58.3125	26561240
58.324	26580623
58.3356	26599939
58.3472	26619188
58.3588	26638370
58.3704	26657486
58.382	26676534
58.3935	26695516
58.4051	26714431
58.4167	26733279
58.4283	26752059
58.4398	26770773
58.4514	26789419
58.4629	26807999
58.4745	26826511
58.486	26844955
58.4976	26863333
58.5091	26881643
58.5207	26899886
58.5322	26918062
58.5438	26936170
58.5553	26954210
58.5668	26972184
58.5784	26990089
58.5899	27007927
58.6014	27025698
58.6129	27043401
58.6245	27061036
58.636	27078604
58.6475	27096104
58.659	27113536
58.6705	27130901
58.682	27148197
58.6935	27165426
58.705	27182587
58.7165	27199681
58.728	27216706
58.7395	27233663
58.751	27250553
58.7625	27267374
58.7739	27284128
58.7854	27300814
58.7969	27317431
58.8084	27333981
58.8199	27350462
58.8313	27366876
58.8428	27383221
58.8543	27399498
58.8657	27415708
58.8772	27431848
58.8886	27447921
58.9001	27463926
58.9115	27479862
58.923	27495730
58.9344	27511530
58.9459	27527262
58.9573	27542925
58.9687	27558520
58.9802	27574047
58.9916	27589506
59.003	27604896
59.0145	27620218
59.0259	27635471
59.0373	27650657
59.0487	27665773
59.0601	27680822
59.0716	27695802
59.083	27710713
59.0944	27725557
59.1058	27740331
59.1172	27755038
59.1286	27769676
59.14	27784245
59.1514	27798746
59.1628	27813179
59.1742	27827543
59.1855	27841839
59.1969	27856066
59.2083	27870225
59.2197	27884316
59.2311	27898337
59.2425	27912291
59.2538	27926176
59.2652	27939992
59.2766	27953740
59.2879	27967420
59.2993	27981031
59.3107	27994573
59.322	28008047
59.3334	28021453
59.3447	28034790
59.3561	28048058
59.3674	28061259
59.3788	28074390
59.3901	28087453
59.4015	28100448
59.4128	28113375
59.4242	28126232
59.4355	28139022
59.4468	28151743
59.4582	28164395
59.4695	28176979
59.4808	28189495
59.4922	28201942
59.5035	28214321
59.5148	28226631
59.5261	28238873
59.5374	28251047
59.5487	28263152
59.5601	28275189
59.5714	28287158
59.5827	28299058
59.594	28310890
59.6053	28322653
59.6166	28334348
59.6279	28345975
59.6392	28357534
59.6505	28369024
59.6618	28380446
59.6731	28391800
59.6844	28403086
59.6957	28414303
59.7069	28425453
59.7182	28436534
59.7295	28447547
59.7408	28458491
59.7521	28469368
59.7633	28480176
59.7746	28490917
59.7859	28501589
59.7972	28512193
59.8084	28522729
59.8197	28533198
59.831	28543598
59.8422	28553930
59.8535	28564194
59.8648	28574390
59.876	28584519
59.8873	28594579
59.8985	28604572
59.9098	28614496
59.921	28624353
59.9323	28634142
59.9435	28643864
59.9548	28653517
59.966	28663103
59.9772	28672621
59.9885	28682071
59.9997	28691454
60.011	28700769
60.0222	28710017
60.0334	28719196
60.0447	28728309
60.0559	28737354
60.0671	28746331
60.0784	28755241
60.0896	28764083
60.1008	28772858
60.112	28781565
60.1232	28790206
60.1345	28798779
60.1457	28807284
60.1569	28815722
60.1681	28824093
60.1793	28832397
60.1905	28840634
60.2017	28848803
60.213	28856906
60.2242	28864941
60.2354	28872909
60.2466	28880811
60.2578	28888645
60.269	28896412
60.2802	28904113
60.2914	28911746
60.3026	28919313
60.3138	28926813
60.325	28934246
60.3362	28941612
60.3474	28948912
60.3586	28956145
60.3698	28963311
60.3809	28970411
60.3921	28977444
60.4033	28984411
60.4145	28991311
60.4257	28998145
60.4369	29004913
60.4481	29011614
60.4592	29018248
60.4704	29024817
60.4816	29031319
60.4928	29037755
60.504	29044125
60.5151	29050429
60.5263	29056666
60.5375	29062838
60.5487	29068944
60.5598	29074983
60.571	29080957
60.5822	29086865
60.5933	29092707
60.6045	29098484
60.6157	29104194
60.6268	29109839
60.638	29115418
60.6492	29120932
60.6603	29126380
60.6715	29131763
60.6827	29137080
60.6938	29142332
60.705	29147518
60.7161	29152639
60.7273	29157695
60.7385	29162685
60.7496	29167611
60.7608	29172471
60.7719	29177266
60.7831	29181996
60.7942	29186661
60.8054	29191261
60.8166	29195796
60.8277	29200267
60.8389	29204672
60.85	29209013
60.8612	29213289
60.8723	29217501
60.8835	29221648
60.8946	29225730
60.9058	29229748
60.9169	29233702
60.9281	29237591
60.9392	29241415
60.9504	29245176
60.9615	29248872
60.9727	29252504
60.9838	29256072
60.995	29259576
61.0061	29263016
61.0172	29266392
61.0284	29269704
61.0395	29272952
61.0507	29276136
61.0618	29279256
61.073	29282313
61.0841	29285307
61.0953	29288236
61.1064	29291102
61.1176	29293905
61.1287	29296644
61.1398	29299320
61.151	29301933
61.1621	29304482
61.1733	29306968
61.1844	29309391
61.1955	29311751
61.2067	29314048
61.2178	29316282
61.229	29318453
61.2401	29320562
61.2513	29322607
61.2624	29324590
61.2736	29326510
61.2847	29328368
61.2958	29330163
61.307	29331895
61.3181	29333565
61.3293	29335173
61.3404	29336719
61.3516	29338202
61.3627	29339623
61.3738	29340982
61.385	29342279
61.3961	29343514
61.4073	29344687
61.4184	29345798
61.4296	29346848
61.4407	29347835
61.4519	29348761
61.463	29349626
61.4742	29350428
61.4853	29351170
61.4965	29351850
61.5076	29352468
61.5187	29353025
61.5299	29353522
61.541	29353956
61.5522	29354330
61.5633	29354643
61.5745	29354895
61.5856	29355086
61.5968	29355216
61.608	29355285
61.6191	29355294
61.6302	29355242
61.6414	29355129
61.6526	29354956
61.6637	29354723
61.6749	29354429
61.686	29354075
61.6972	29353660
61.7084	29353186
61.7195	29352651
61.7307	29352057
61.7418	29351402
61.753	29350687
61.7642	29349913
61.7753	29349079
61.7865	29348185
61.7976	29347232
61.8088	29346219
61.82	29345147
61.8312	29344015
61.8423	29342824
61.8535	29341574
61.8647	29340264
61.8758	29338895
61.887	29337468
61.8982	29335981
61.9094	29334435
61.9205	29332831
61.9317	29331168
61.9429	29329446
61.9541	29327665
61.9652	29325826
61.9764	29323929
61.9876	29321973
61.9988	29319959
62.01	29317886
62.0212	29315755
62.0324	29313566
62.0436	29311320
62.0547	29309015
62.0659	29306652
62.0771	29304232
62.0883	29301753
62.0995	29299217
62.1107	29296624
62.1219	29293973
62.1331	29291264
62.1443	29288498
62.1555	29285675
62.1667	29282795
62.1779	29279857
62.1891	29276863
62.2004	29273811
62.2116	29270702
62.2228	29267537
62.234	29264315
62.2452	29261036
62.2564	29257701
62.2677	29254308
62.2789	29250860
62.2901	29247355
62.3013	29243794
62.3125	29240177
62.3238	29236503
62.335	29232773
62.3462	29228988
62.3575	29225146
62.3687	29221249
62.3799	29217296
62.3912	29213287
62.4024	29209222
62.4137	29205102
62.4249	29200927
62.4362	29196696
62.4474	29192410
62.4587	29188068
62.4699	29183672
62.4812	29179220
62.4924	29174714
62.5037	29170152
62.5149	29165536
62.5262	29160865
62.5375	29156139
62.5487	29151359
62.56	29146524
62.5713	29141635
62.5826	29136692
62.5938	29131694
62.6051	29126642
62.6164	29121536
62.6277	29116376
62.639	29111162
62.6502	29105894
62.6615	29100572
62.6728	29095197
62.6841	29089768
62.6954	29084285
62.7067	29078749
62.718	29073160
62.7293	29067517
62.7407	29061821
62.752	29056072
62.7633	29050270
62.7746	29044415
62.7859	29038507
62.7972	29032547
62.8085	29026533
62.8199	29020467
62.8312	29014349
62.8425	29008177
62.8539	29001954
62.8652	28995678
62.8765	28989350
62.8879	28982970
62.8992	28976538
62.9106	28970054
62.9219	28963518
62.9333	28956930
62.9446	28950291
62.956	28943600
62.9674	28936857
62.9787	28930063
62.9901	28923217
63.0015	28916321
63.0128	28909373
63.0242	28902373
63.0356	28895323
63.047	28888222
63.0584	28881070
63.0697	28873867
63.0811	28866614
63.0925	28859310
63.1039	28851955
63.1153	28844550
63.1267	28837095
63.1382	28829589
63.1496	28822033
63.161	28814427
63.1724	28806771
63.1838	28799065
63.1952	28791309
63.2067	28783504
63.2181	28775648
63.2295	28767744
63.241	28759789
63.2524	28751786
63.2639	28743732
63.2753	28735630
63.2867	28727479
63.2982	28719278
63.3097	28711029
63.3211	28702730
63.3326	28694383
63.3441	28685987
63.3555	28677543
63.367	28669049
63.3785	28660508
63.39	28651918
63.4015	28643280
63.413	28634593
63.4245	28625859
63.4359	28617076
63.4475	28608246
63.459	28599367
63.4705	28590441
63.482	28581468
63.4935	28572446
63.505	28563378
63.5165	28554261
63.5281	28545098
63.5396	28535887
63.5511	28526629
63.5627	28517324
63.5742	28507972
63.5858	28498573
63.5973	28489128
63.6089	28479636
63.6204	28470097
63.632	28460511
63.6436	28450879
63.6551	28441201
63.6667	28431477
63.6783	28421706
63.6899	28411890
63.7015	28402027
63.7131	28392118
63.7247	28382164
63.7363	28372164
63.7479	28362118
63.7595	28352027
63.7711	28341890
63.7827	28331708
63.7943	28321481
63.806	28311208
63.8176	28300891
63.8292	28290528
63.8409	28280121
63.8525	28269669
63.8642	28259172
63.8758	28248630
63.8875	28238044
63.8991	28227413
63.9108	28216738
63.9225	28206019
63.9342	28195255
63.9459	28184448
63.9575	28173596
63.9692	28162700
63.9809	28151761
63.9926	28140778
64.0043	28129751
64.016	28118681
64.0277	28107567
64.0395	28096410
64.0512	28085210
64.0629	28073966
64.0747	28062679
64.0864	28051350
64.0981	28039977
64.1099	28028562
64.1216	28017103
64.1334	28005603
64.1452	27994059
64.1569	27982473
64.1687	27970845
64.1805	27959175
64.1923	27947462
64.204	27935707
64.2158	27923911
64.2276	27912072
64.2394	27900191
64.2512	27888269
64.2631	27876305
64.2749	27864300
64.2867	27852253
64.2985	27840165
64.3104	27828035
64.3222	27815865
64.3341	27803653
64.3459	27791400
64.3578	27779106
64.3696	27766772
64.3815	27754397
64.3934	27741981
64.4052	27729525
64.4171	27717028
64.429	27704491
64.4409	27691913
64.4528	27679296
64.4647	27666638
64.4766	27653940
64.4885	27641203
64.5005	27628425
64.5124	27615608
64.5243	27602752
64.5362	27589856
64.5482	27576920
64.5601	27563945
64.5721	27550931
64.5841	27537878
64.596	27524785
64.608	27511654
64.62	27498484
64.632	27485274
64.6439	27472027
64.6559	27458740
64.6679	27445416
64.6799	27432052
64.692	27418651
64.704	27405211
64.716	27391733
64.728	27378217
64.74	27364663
64.7521	27351072
64.7641	27337442
64.7762	27323775
64.7883	27310070
64.8003	27296328
64.8124	27282548
64.8245	27268731
64.8366	27254877
64.8486	27240986
64.8607	27227058
64.8728	27213092
64.885	27199090
64.8971	27185051
64.9092	27170976
64.9213	27156864
64.9334	27142716
64.9456	27128531
64.9577	27114310
64.9699	27100052
64.982	27085759
64.9942	27071430
65.0064	27057064
65.0186	27042663
65.0307	27028226
65.0429	27013754
65.0551	26999246
65.0673	26984702
65.0795	26970124
65.0918	26955510
65.104	26940860
65.1162	26926176
65.1285	26911457
65.1407	26896703
65.1529	26881914
65.1652	26867090
65.1775	26852232
65.1897	26837339
65.202	26822412
65.2143	26807451
65.2266	26792455
65.2389	26777425
65.2512	26762362
65.2635	26747264
65.2758	26732132
65.2881	26716967
65.3004	26701767
65.3128	26686535
65.3251	26671269
65.3375	26655969
65.3498	26640636
65.3622	26625270
65.3746	26609871
65.3869	26594439
65.3993	26578974
65.4117	26563476
65.4241	26547945
65.4365	26532382
65.4489	26516786
65.4614	26501157
65.4738	26485497
65.4862	26469804
65.4987	26454078
65.5111	26438321
65.5236	26422532
65.536	26406711
65.5485	26390858
65.561	26374973
65.5735	26359057
65.586	26343109
65.5985	26327130
65.611	26311119
65.6235	26295077
65.636	26279004
65.6485	26262900
65.6611	26246765
65.6736	26230599
65.6862	26214402
65.6987	26198175
65.7113	26181917
65.7239	26165628
65.7364	26149309
65.749	26132960
65.7616	26116580
65.7742	26100171
65.7868	26083731
65.7995	26067261
65.8121	26050762
65.8247	26034232
65.8374	26017673
65.85	26001085
65.8627	25984467
65.8753	25967820
65.888	25951143
65.9007	25934437
65.9134	25917702
65.9261	25900938
65.9388	25884145
65.9515	25867323
65.9642	25850472
65.9769	25833593
65.9896	25816685
66.0024	25799749
66.0151	25782784
66.0279	25765791
66.0407	25748770
66.0534	25731721
66.0662	25714644
66.079	25697539
66.0918	25680406
66.1046	25663245
66.1174	25646057
66.1303	25628841
66.1431	25611598
66.1559	25594327
66.1688	25577029
66.1816	25559704
66.1945	25542352
66.2074	25524973
66.2202	25507566
66.2331	25490134
66.246	25472674
66.2589	25455188
66.2718	25437675
66.2847	25420136
66.2977	25402570
66.3106	25384978
66.3235	25367360
66.3365	25349716
66.3495	25332046
66.3624	25314350
66.3754	25296629
66.3884	25278881
66.4014	25261108
66.4144	25243310
66.4274	25225486
66.4404	25207637
66.4535	25189762
66.4665	25171862
66.4795	25153938
66.4926	25135988
66.5057	25118013
66.5187	25100014
66.5318	25081990
66.5449	25063941
66.558	25045868
66.5711	25027770
66.5842	25009648
66.5973	24991502
66.6105	24973332
66.6236	24955137
66.6368	24936919
66.6499	24918677
66.6631	24900411
66.6763	24882121
66.6894	24863808
66.7026	24845471
66.7158	24827110
66.729	24808727
66.7423	24790320
66.7555	24771890
66.7687	24753437
66.782	24734961
66.7952	24716462
66.8085	24697940
66.8218	24679396
66.835	24660829
66.8483	24642240
66.8616	24623628
66.8749	24604994
66.8883	24586337
66.9016	24567658
66.9149	24548958
66.9283	24530235
66.9416	24511491
66.955	24492724
66.9684	24473936
66.9817	24455127
66.9951	24436295
67.0085	24417443
67.0219	24398569
67.0354	24379674
67.0488	24360757
67.0622	24341820
67.0757	24322862
67.0891	24303882
67.1026	24284882
67.1161	24265861
67.1295	24246820
67.143	24227758
67.1565	24208676
67.1701	24189573
67.1836	24170450
67.1971	24151307
67.2106	24132143
67.2242	24112960
67.2378	24093757
67.2513	24074534
67.2649	24055291
67.2785	24036029
67.2921	24016747
67.3057	23997445
67.3193	23978125
67.3329	23958785
67.3466	23939425
67.3602	23920047
67.3739	23900650
67.3875	23881233
67.4012	23861798
67.4149	23842344
67.4286	23822872
67.4423	23803381
67.456	23783871
67.4697	23764343
67.4834	23744797
67.4972	23725232
67.5109	23705649
67.5247	23686049
67.5385	23666430
67.5522	23646793
67.566	23627139
67.5798	23607467
67.5936	23587777
67.6075	23568070
67.6213	23548345
67.6351	23528604
67.649	23508844
67.6628	23489068
67.6767	23469274
67.6906	23449464
67.7045	23429637
67.7184	23409792
67.7323	23389931
67.7462	23370054
67.7601	23350160
67.7741	23330249
67.788	23310322
67.802	23290379
67.8159	23270419
67.8299	23250444
67.8439	23230452
67.8579	23210444
67.8719	23190421
67.8859	23170382
67.9	23150327
67.914	23130256
67.928	23110170
67.9421	23090069
67.9562	23069952
67.9703	23049820
67.9844	23029672
67.9985	23009510
68.0126	22989333
68.0267	22969140
68.0408	22948933
68.055	22928711
68.0691	22908475
68.0833	22888224
68.0974	22867958
68.1116	22847678
68.1258	22827384
68.14	22807075
68.1543	22786752
68.1685	22766416
68.1827	22746065
68.197	22725700
68.2112	22705322
68.2255	22684930
68.2398	22664524
68.2541	22644104
68.2683	22623672
68.2827	22603225
68.297	22582766
68.3113	22562293
68.3256	22541807
68.34	22521308
68.3544	22500797
68.3687	22480272
68.3831	22459734
68.3975	22439184
68.4119	22418621
68.4263	22398046
68.4408	22377458
68.4552	22356858
68.4696	22336245
68.4841	22315620
68.4986	22294984
68.5131	22274335
68.5275	22253674
68.542	22233001
68.5566	22212317
68.5711	22191620
68.5856	22170912
68.6001	22150193
68.6147	22129462
68.6293	22108720
68.6439	22087967
68.6584	22067202
68.673	22046426
68.6876	22025639
68.7023	22004841
68.7169	21984032
68.7315	21963213
68.7462	21942383
68.7609	21921542
68.7755	21900690
68.7902	21879828
68.8049	21858956
68.8196	21838074
68.8343	21817181
68.8491	21796278
68.8638	21775365
68.8786	21754442
68.8933	21733509
68.9081	21712566
68.9229	21691614
68.9377	21670652
68.9525	21649680
68.9673	21628699
68.9821	21607708
68.997	21586708
69.0118	21565699
69.0267	21544681
69.0416	21523654
69.0564	21502617
69.0713	21481572
69.0863	21460518
69.1012	21439455
69.1161	21418383
69.131	21397303
69.146	21376214
69.161	21355117
69.1759	21334011
69.1909	21312897
69.2059	21291775
69.2209	21270645
69.236	21249507
69.251	21228360
69.266	21207206
69.2811	21186044
69.2961	21164875
69.3112	21143697
69.3263	21122513
69.3414	21101320
69.3565	21080120
69.3716	21058913
69.3868	21037699
69.4019	21016477
69.4171	20995249
69.4322	20974013
69.4474	20952770
69.4626	20931521
69.4778	20910264
69.493	20889001
69.5083	20867732
69.5235	20846455
69.5387	20825173
69.554	20803884
69.5693	20782588
69.5846	20761287
69.5999	20739979
69.6152	20718665
69.6305	20697345
69.6458	20676019
69.6612	20654687
69.6765	20633350
69.6919	20612007
69.7073	20590658
69.7226	20569303
69.738	20547944
69.7534	20526578
69.7689	20505208
69.7843	20483832
69.7998	20462451
69.8152	20441065
69.8307	20419673
69.8462	20398277
69.8616	20376876
69.8772	20355471
69.8927	20334060
69.9082	20312645
69.9237	20291225
69.9393	20269801
69.9548	20248373
69.9704	20226940
69.986	20205502
70.0016	20184061
70.0172	20162616
70.0328	20141166
70.0485	20119712
70.0641	20098255
70.0798	20076794
70.0954	20055329
70.1111	20033860
70.1268	20012388
70.1425	19990912
70.1582	19969433
70.174	19947950
70.1897	19926464
70.2055	19904975
70.2212	19883483
70.237	19861987
70.2528	19840489
70.2686	19818988
70.2844	19797483
70.3002	19775976
70.3161	19754467
70.3319	19732954
70.3478	19711439
70.3637	19689922
70.3795	19668402
70.3954	19646880
70.4113	19625355
70.4273	19603829
70.4432	19582300
70.4591	19560769
70.4751	19539236
70.4911	19517701
70.5071	19496164
70.523	19474626
70.5391	19453086
70.5551	19431544
70.5711	19410001
70.5871	19388456
70.6032	19366909
70.6192	19345362
70.6353	19323813
70.6514	19302263
70.6675	19280711
70.6836	19259159
70.6998	19237605
70.7159	19216051
70.7321	19194496
70.7482	19172940
70.7644	19151383
70.7806	19129826
70.7968	19108268
70.813	19086709
70.8292	19065150
70.8454	19043591
70.8617	19022032
70.8779	19000472
70.8942	18978912
70.9105	18957352
70.9268	18935791
70.9431	18914231
70.9594	18892671
70.9758	18871111
70.9921	18849552
71.0085	18827993
71.0248	18806434
71.0412	18784875
71.0576	18763317
71.074	18741760
71.0904	18720203
71.1069	18698647
71.1233	18677092
71.1398	18655538
71.1562	18633984
71.1727	18612432
71.1892	18590880
71.2057	18569330
71.2222	18547781
71.2388	18526233
71.2553	18504686
71.2719	18483141
71.2884	18461598
71.305	18440055
71.3216	18418515
71.3382	18396976
71.3548	18375439
71.3715	18353903
71.3881	18332370
71.4048	18310838
71.4214	18289308
71.4381	18267780
71.4548	18246255
71.4715	18224731
71.4882	18203210
71.5049	18181691
71.5217	18160175
71.5384	18138661
71.5552	18117149
71.572	18095640
71.5888	18074134
71.6056	18052630
71.6224	18031129
71.6392	18009631
71.656	17988136
71.6729	17966643
71.6898	17945154
71.7066	17923668
71.7235	17902185
71.7404	17880705
[truncated: 2,519 more rows]

## Sheet: 4 e
Different exposure times were used for each protein in order to show the best comparison and prevent saturation
Antibody	Company	Accesion	Dilution
ALIX	Cell signaling	2171	1:1000
TSG101	Santa Cruz Biotechnology	SC-7964	1:100
CD81	Santa Cruz Biotechnology	SC-166029	1:100
flotillin-1	BD Biosciences	610820	1:1000
CD9	Cell signaling	13403S	1:1000
EGFP	Merck milipore	MAB3580	1:1000
