# Supplementary material for: Recombinant extracellular vesicles as biological reference material for method development, data normalization and assessment of (pre-)analytical variables
Source: Springer Nature journal article supplement (doi:10.1038/s41596-020-00446-5), 2021-01-15
Supplement: MOESM4 [file 41596_2020_446_MOESM4_ESM21.xlsx]

## Sheet: 5 a
# rEV	RFU (platereader)				Dilution factor	fNTA				# rEV	Cq values (RT-qPCR)				# rEV	OD (ELISA)				# rEV	Number of events (HRFC)
1.32999e+10	6.49831	6.46389	6.46982		0	9.66e+08	1.03e+09	1.03e+09		2.53e+10	16.35	16.49	16.55		12500000	1.803	1.71	1.746		2000000	5.80177
8.89e+09	6.33445	6.32634	6.35603		0.30103	5.18e+08	5.09e+08	5.04001e+08		6.33e+09	18.54	18.28	18.26		6250000	1.08	1.05	1.013		20000000	4.8384
5.93e+09	6.18752	6.13672	6.12385		0.60206	2.32e+08	2.37e+08	2.21e+08		1.58e+09	20.05	19.79	19.98		3130000	0.654	0.638	0.633		200000000	3.83525
3.95e+09	6.03342	6.01703	5.99034		0.90309	8.23e+07	9.21e+07	1.08e+08		3.95e+08	23.31	23.32	23.3		1560000	0.403	0.383	0.406		2000000000	2.91381
2.63e+09	5.82608	5.78817	5.78319							9.88e+07	24.43	24.46	24.27		781000	0.295	0.281	0.268
1.76e+09	5.62941	5.65514	5.617							2.47e+07	26.67	26.62	26.7
1.17e+09	5.53529	5.45025	5.41497
7.80001e+08	5.37291	5.30103	5.17319
5.2e+08	5.21748	5.07918	4.90956

## Sheet: 5 c
fNTA				RT-QPCR					ELISA
rEV spiked	rEV recovered			rEV spiked	rEV recovered				rEV spiked	rEV recovered
100000000000	28000000000	27300000000		8.99995e+10	1.61284e+10	1.52511e+10	1.45118e+10		1.12001e+10	1.05e+10	9.00001e+09
50000000000	15200000000	12300000000		2.24999e+10	5.14177e+09	4.29402e+09	4.77237e+09		1.12e+09	8.51001e+08	8.9e+08
10000000000	2770000000	2410000000		5.62999e+09	1.90281e+09	1.52145e+09	1.62907e+09		1.12e+08	7.83e+07	8.92e+07
				1.41e+09	4.5867e+08	4.50199e+08	5.12942e+08
