# Supplementary material for: Recombinant extracellular vesicles as biological reference material for method development, data normalization and assessment of (pre-)analytical variables
Source: Springer Nature journal article supplement (doi:10.1038/s41596-020-00446-5), 2021-01-15
Supplement: MOESM5 [file 41596_2020_446_MOESM5_ESM22.xlsx]

## Sheet: 6 e
Absolute CV (%)	Normalized CV (%)
1.02161	5.40825
1.27804	3.94067
1.43291	6.43462
7.05742	0.678685
0.94973	4.51268
1.4433	4.26269
3.54069	1.98536
1.22559	3.47593
0.767506	4.1112
2.11817	3.38
1.52804	3.45864
1.85829	3.67846
5.51513	0.985923
2.58972	2.2723
1.86286	4.2477
0.671272	4.1191
1.99352	3.92214
1.30933	4.2791
2.97537	3.05099
2.00752	3.42859
4.87898	1.21092
2.06095	5.83155
0	0
2.60264	3.00269
2.81123	5.19635
9.16239	2.8029
3.19188	3.04092
4.53629	0
6.50854	5.06052
9.87795	2.16936
4.78181	2.65579
8.96694	2.00784
5.73433	1.21574
4.11002	4.25758
1.18172	6.75334
15.2942	1.43038
3.85937	3.77239
1.25016	1.46662
4.15947	1.71247
3.85193	2.73646
1.99641	3.95424
2.07807	7.66064
13.7297	5.59422
1.93862	9.23363
13.5232	1.1804
8.10062	1.23507
4.75729	2.45514
3.33342	1.78658
7.77114	2.27328
3.37177	1.73004
4.27089	3.50987
1.20663	1.89123
8.22756	6.44402
6.0079	2.0874
10.3437	1.92021
3.31331	5.8931
4.96773	6.20473
1.25621	4.11739
11.29	1.3788
0	2.86047
2.85731	2.07457
5.94322	9.97131
2.05946	1.74998
3.61224	2.50447
18.5243	2.54122
5.08411	0.508827
3.19491	4.61044
3.57829	6.61226
7.44091	2.56903
1.58012	2.40386
2.72732	0
3.06357	3.06589
6.34907	1.12037
0	0.712191
6.60519	2.13818
4.47646	4.04268
7.27289	4.44708
4.68512	6.99358
2.44425	4.85372
6.27541	2.81001
11.3027	6.39835
11.8908	2.57237
8.85233	2.27856
13.7218	0.699515
1.63588	1.20275
3.45359	3.58308
6.42323	10.6565
4.56232	1.32423
6.73495	3.64817
19.0152	1.36377
3.89634	2.09398
1.91846	1.29241
7.58842	5.48042
1.9843	4.75528
3.904	2.09561
5.97981	2.896
1.14455	2.61091
4.21628	5.66255
8.85993	3.0344
3.47294	0
10.0186	4.10727
1.44703	0
0	3.79964
1.69653	4.41136
0	1.70587
1.15799	4.68122
1.05462	4.5668
6.93999	8.57232
0.684757	4.46486
1.14745	4.18527
15.9916	3.41428
0.470937	2.82104
1.38669	4.16302
1.93086	3.62274
2.12533	14.4841
1.11824	2.72543
1.68821	2.5785
21.3586	3.78403
2.23985	2.79086
2.15744	3.63272
5.94758	0.535617
1.29765	6.49652
1.20993	1.58225
4.6668	1.02926
13.7119	2.22585
4.25703	2.70805
4.40652	2.84276
2.24303	2.6225
2.46326	0.55777
2.24916	0.731686
2.42534	0.886238
5.53095	0.915674
4.06437	1.14403
5.3158	5.84391
3.73917	4.25161
4.53605	3.66936
1.53598	3.09219
0.228035	2.21796
0.899919	2.99309
2.31761	4.01244
7.26767	2.8448
2.95929	0.870536
2.01674	5.41929
3.17729	4.57178
4.79573	8.58485
7.45024	1.07828
8.10834	2.58868
13.0408	2.44307
3.65325	2.64445
3.90897	3.39827
8.28671	5.45563
3.79144	2.4678
2.82715	2.32882
1.41907	1.90117
3.02355	3.46689
3.2835	1.08133
3.88079	4.91627
2.25666	4.65162
3.99717	5.0333
1.22198	7.9455
0.498838	1.40856
1.57418	0.711586
2.12755	0
2.60949	0.99659
4.77977	1.42711
0	18.4106
4.39641	2.0953
5.12214	1.16924
27.3958
3.73854	1.50896
3.72904	5.30652
	1.41703
3.85686	1.71708
1.36618	2.29681
3.48304	7.23901
3.80944	2.34229
2.48249	0.844437
11.3646	4.83288
4.97466	5.28847
5.79797	1.59943
1.22819	1.48525
11.5634	1.05989
3.81325	0
3.69718	2.2331
6.67405	4.19524
0	1.09988
4.0642	1.58875
1.32893	3.63531
7.88232	1.46332
3.24696	1.39716
2.03758	1.37826
4.51383	4.24866
4.41067	1.50335
7.1371	5.58273
9.14217	2.20703
5.25595	1.63578
11.9532	2.99242
1.42329	3.39318
7.03123	4.05698
3.79701	4.47846
7.05989	1.81749
5.12698	1.55286
11.295	9.8236
10.1069	1.45903
4.21942	1.95166
6.31849	3.35277
9.96453	1.09779
4.01355	1.67799
7.44425	5.19207
6.88869	1.42543
6.51993	2.99219
7.26509	1.03704
0.16867	1.09371
4.31272	3.24455
3.18532	0
4.74981	2.55595
3.99712	1.39533
3.38949	2.15501
0	2.96946
3.82184	3.01946
4.44594	3.74415
6.4682	4.26763
7.48032	1.29193
2.44727	6.28845
8.60036	3.7658
9.84991	1.09993
5.1044	0
10.9847	8.14053
2.53253	1.60929
4.41209	3.43383
0	1.01462
3.99716	3.80614
3.3039	0.267757
2.72708	0.231403
4.58005	3.50182
1.22532	2.63758
6.4926	3.91493
5.38409	4.41687
2.27533	1.28243
2.23223	5.84217
0.551857	1.08562
1.29451	2.01992
4.24755	13.8917
9.07487	4.54586
4.98741	2.82816
4.17989	0.237111
22.849	3.21258
8.96882	1.19094
2.75159	1.72632
6.34901	1.69745
8.22806	4.62551
3.6745	12.318
6.96818	5.41571
4.21509	6.58998
9.39061	1.60533
20.2951	2.50736
0.494145	3.53706
13.3105	2.09853
4.03601	1.95418
7.03863	0
2.15244	1.00821
5.58322	0.85299
3.47772	1.27767
0	0.563064
5.50066	1.37628
5.8087	0
5.83216	3.14506
4.98838	0.274646
3.84056	4.48834
0	0.526003
3.54938	1.43621
6.07716	2.18635
8.76436	1.69916
5.97761	2.64333
4.52925	2.15803
5.59219	1.33698
3.44639	0
3.28706	2.18601
7.06598	0.988905
4.41886	2.21831
0	2.62305
3.70246	4.31153
4.66714	1.59284
2.74938	2.89072
3.31665	6.03836
1.74425	8.33101
5.29312	9.40531
6.95892	1.55308
10.1001	2.74569
16.1912	1.00654
2.91638	1.71598
4.24235	1.05293
2.13648	3.53528
4.43827	4.51754
3.75976	1.66907
5.25804	3.33301
2.00288	2.59165
2.93561	1.70177
3.75428	1.6387
2.98783	1.55491
2.8219	2.26211
6.64054	3.14548
3.55329	5.06123
5.32057	0
2.57889	4.81057
5.79541	2.30312
11.788	0.850341
0	3.59797
8.17333	7.01322
5.72744	5.06558
4.31158	1.28832
4.73293	3.42492
15.0212	2.21145
1.95631	3.15717
5.10428	2.51635
2.0189	0
3.34936	2.9543
2.21335	1.11812
3.35475	3.82289
0	6.24796
3.16229	2.36468
7.33672	1.99442
4.00402	2.10181
1.74356	2.58582
7.1012	2.08404
5.73584	2.79006
3.60151	0.471854
2.81444	3.56054
2.86881	2.10535
4.9698	2.22007
7.48859	4.12705
1.84787	4.07597
5.18294	1.93367
3.37877	1.47227
12.1698	2.34795
1.98088	1.38216
3.84397	3.35599
5.50544	1.31897
2.75946	0.661374
4.62529	0
7.53021	5.19192
8.3602	5.36857
4.78677	4.80106
5.54008	7.6032
0	3.21664
3.42694	2.25773
4.58486	1.5425
9.17651	4.46318
1.36591	1.77659
2.79856	2.02122
2.42733	3.18223
3.36007	4.06412
3.30771	4.11242
4.20741	4.74534
4.20545	2.32377
2.89203	3.64436
7.25094	16.224
11.5484	4.96316
3.98985	0
0	3.33616
8.95662	3.36856
1.78962	3.61242
8.02905	0.800411
1.36157	6.30834
0	0
2.70224	2.23248
3.10484	3.09725
8.35173	0
7.23088	1.8179
13.3922	4.70415
0	1.44559
4.12264	2.50144
2.06671	1.99611
0	0
7.47049	4.02382
5.21014	1.95388
3.87885	3.68138
4.55736	2.39668
3.3595	3.334
0	4.45881
2.62771	4.3783
6.06638	1.69899
3.43312	1.32377
3.22901	12.0369
12.8432	2.66517
2.34856	1.38421
1.11761	9.17029
8.04164	8.43364
8.94527	4.79213
4.63918	0.355068
6.53839	0
6.29236	0.178266
6.57835
13.9059	1.72385
16.3255	2.31581
6.67095	5.82633
9.01222	2.16694
0	0.677102
6.62318	6.21841
	6.27186
6.62705	0
7.41953	0.66139
3.4295	3.40375
14.4621	3.25009
3.31745	1.52401
7.23415	2.32378
2.31148	4.32241
1.65495	5.43369
0	3.14533
6.13073	1.47563
2.46066	0.497128
2.42037	2.73314
4.14112	0
7.71586	1.73065
10.8688	0
9.27746	1.74792
9.32353	3.72427
4.6031	1.60019
5.2103	2.70058
6.2982	0.862947
6.23765	2.00597
0	1.98811
5.76013	3.40446
0	1.66916
3.69507	3.50784
8.82277	7.89246
4.51749	7.3011
3.311	7.21836
5.14954	3.89892
7.05072	1.26452
4.01241	2.30398
10.4104	3.1316
8.65259	3.45626
2.71763	1.70433
14.3393	5.70026
10.9384	2.49388
0.425024	0.619643
9.13251
7.11573	0
3.58966	2.28085
11.2942	1.47208
7.11401	5.71366
4.84837	5.0524
10.8588	3.67835
2.73353	3.63943
5.32279	1.67666
	3.76213
0	7.65363
3.2452	1.86258
5.7906	7.77239
9.74487	3.52625
10.2936	2.04899
9.26958	1.22675
9.56031	1.61074
3.27873	2.25694
10.1673	3.2876
13.8529	1.26507
3.40576	0.410022
15.6612	1.05142
1.52101	1.78824
4.47596	1.06314
6.29511	1.83165
3.75676	1.99151
2.80363	3.99623
2.63074	1.73363
4.91805	2.01165
5.75399	4.38945
4.43019	0.711673
3.24139	3.28221
6.36971	3.72446
7.63431	0.0201038
3.15453	1.40263
8.478	2.17565
4.2254	0.931164
3.87855	2.21565
8.49842	1.54294
4.86515	1.08065
8.1656	0
7.51619	2.89853
6.80913	3.41204
3.27852	5.2645
5.65294	1.95134
4.1091	2.06333
3.79341	0.850397
5.6884	2.69726
4.17284	1.09395
0	4.53002
3.04301	3.578
2.32082	2.38837
0.208932	2.08012
3.29626	3.08899
8.82029	0.431165
7.74884	2.41887
3.94096	4.20681
5.995	1.66205
0.880453	1.10683
7.67886	2.03288
4.99382	3.21811
3.89026	2.68022
2.81495	2.8828
7.26667	1.81096
4.82494	0
1.4001	1.25075
3.4446
2.42132	2.88676
3.8858	1.56651
9.28652	2.72379
9.95003	0
3.11472	0
4.70539	9.87421
0	4.52241
4.29452	4.55988
	2.77216
7.12211	2.70403
4.63562	1.94132
4.67176	2.92421
0	4.39924
0	2.14966
16.3366	2.86429
2.96801	0
8.4556	0.447769
10.6179	0
4.15118	3.73794
3.50244	2.19835
5.37533	2.20745
8.69746	3.82686
3.42645	1.63535
6.81478	4.45427
0	0
5.89862	3.09853
0	2.57333
11.2807	2.62912
9.12581	5.94456
3.37465	1.2509
7.4934	1.69253
5.50713	2.76844
1.42256	1.91819
0	1.64156
2.22868	0.725309
2.99665	0.539819
3.41659	1.80375
14.0336	6.63206
4.76303	0.87923
4.2889	3.66287
6.08941	4.00167
8.83871	4.115
5.75634	0
0	1.12829
6.11999	1.07626
7.43587	2.23491
9.90942	1.47345
1.93618	1.98577
4.81917	2.1926
2.29489	0
10.0238	3.27588
1.37603	5.96961
0	0
5.9111	4.20493
4.62745	4.75653
3.06386	1.55411
4.49349	4.47112
3.64096	2.64106
3.90773	0.883985
0	1.57252
2.05967	5.36123
2.43901	0.709482
0	1.95816
1.50526	4.8315
0.845312	4.69918
3.67366	0
3.00203	0.940347
4.06795	2.02885
5.18305	0.383233
5.94279	1.75106
4.41534	0
6.70889	2.57669
3.8752	4.0217
2.30017	0.563843
2.92488	3.83877
0	2.98478
5.51726	8.45159
7.94677	2.67927
8.00984	4.84798
3.80848	0
0	0
10.0253	2.25561
0	1.99549
9.93225	2.29257
6.99769	3.5193
5.21674	3.47802
7.8566	3.56729
17.3862	1.86334
3.02904	2.09866
11.1491	2.70298
0	2.88966
0	4.1979
3.34401	3.76609
3.97446	2.02277
6.63547	5.08878
8.25752	3.5267
6.07567	5.63061
3.08781	0.865112
5.18531	1.70465
8.21141	3.37137
3.04875	3.09711
2.48194	1.97117
9.14534	14.8273
1.91459	3.10918
6.86696	6.29991
7.08243	2.03701
2.23618	0
10.3663	2.4833
5.91576	2.67158
8.81802	2.42824
2.93639	3.88338
8.33093	2.77048
1.03839	3.04035
8.54668	2.05358
8.17383	9.00237
8.48099	2.71621
0.809448	0.917575
4.48015	3.63784
0	1.91037
3.20908	3.17253
3.99122	10.8548
4.73391	1.90009
8.79164	3.07356
2.13992
3.60084
6.04565
3.72422
10.5467
5.62251
7.55544
5.4196
3.68135
5.01157
3.73423
1.68876
