# Supplementary material for: Recombinant extracellular vesicles as biological reference material for method development, data normalization and assessment of (pre-)analytical variables
Source: Springer Nature journal article supplement (doi:10.1038/s41596-020-00446-5), 2021-01-15
Supplement: MOESM6 [file 41596_2020_446_MOESM6_ESM23.xlsx]

## Sheet: 7 a
ODG density	0.1 % triton			0.025 % triton			0.0125% triton			0.01% triton			0.001% triton			0.0001%triton
1.086	0	0	0	0	0	0	3.28	0.42	0.34	0	0.31	0.38	0.86	0.58	7.88	6.97	0.59	0.98
1.103	0	0	0	0	0	0	51.54	48.1	46.23	56.65	61.87	65.59	61.76	65.66	62.02	65.16	63.13	65.67
1.119	0	0	0	0	0	0	16.72	22.45	21.43	21.1	20.62	16.31	25.86	23.96	18.36	16.59	27.09	24.78
1.125	0	0	0	0	0	0	7.66	4.93	5.52	6.62	4.27	3.62	4.27	3.71	4.65	4.2	4.34	3.07
1.141	0	0	0	13	6.04	10.93	16.64	15.87	19.1	11.72	7.69	8.21	4.57	3.74	5.83	5.82	3	3.81
1.186	100	100	100	77.41	93.96	89.07	4.16	8.23	7.38	3.91	5.23	5.89	2.68	2.35	1.27	1.26	1.84	1.69

## Sheet: 7 b
% Trition	ratio EV density:high density
0.1	0	0	0
0.025	0	0	0
0.0125	3.43883	2.94484	2.5677
0.01	4.97513	6.41045	5.83779
0.001	12.4388	14.8124	12.202
0.0001	12.5386	18.7409	16.6242

## Sheet: 7 d
time (min)	Replicate 1		time (min)	Replicate 2		time (min)	Replicate 3		time (min)	Replicate 4
-0.23565	-0.00025		-0.2352	-0.00015		-0.23125	0.002903		-0.64252	0.00153
-0.22746	-0.00033		-0.22701	-0.00013		-0.22306	0.001432		-0.63433	0.000776
-0.21927	-0.0004		-0.21882	-0.00013		-0.21487	-4e-05		-0.62614	0.002688
-0.21108	-0.00044		-0.21063	-0.00013		-0.20668	-8.5e-05		-0.61795	0.005111
-0.20289	-0.00047		-0.20244	-0.00014		-0.19849	-0.00013		-0.60976	0.005621
-0.1947	-0.0006		-0.19425	-0.00015		-0.1903	-0.00017		-0.60157	0.006661
-0.18651	-0.0005		-0.18606	-0.00015		-0.18211	0.0007		-0.59338	0.006119
-0.17832	-0.00027		-0.17787	-0.00017		-0.17392	0.00085		-0.58519	0.005577
-0.17013	-0.00026		-0.16968	-0.0001		-0.16573	0.00083		-0.577	0.003443
-0.16194	-0.00026		-0.16149	-8.6e-05		-0.15754	0.00081		-0.56881	0.001729
-0.15375	-0.00026		-0.1533	-8.7e-05		-0.14935	0.000339		-0.56062	0.001811
-0.14556	-0.00027		-0.14511	-8.8e-05		-0.14116	-0.00016		-0.55243	0.001851
-0.13738	-0.00034		-0.13693	-0.00013		-0.13297	-0.00026		-0.54424	0.00189
-0.12919	-0.00046		-0.12874	-0.00021		-0.12478	-0.00033		-0.53605	0.001894
-0.121	-0.00036		-0.12055	-0.00021		-0.11659	-0.00044		-0.52786	0.001898
-0.11281	-0.00036		-0.11236	-0.00022		-0.1084	-0.00034		-0.51967	0.001901
-0.10462	-0.00036		-0.10417	-0.0003		-0.10021	-0.00019		-0.51148	0.001913
-0.09643	-0.00037		-0.09598	-0.00012		-0.09202	-0.00016		-0.50329	0.002306
-0.08824	-0.00047		-0.08779	-0.00011		-0.08383	-0.00016		-0.4951	0.00603
-0.08005	-0.00039		-0.0796	-0.00011		-0.07564	-0.00016		-0.48691	0.010447
-0.07186	-0.00038		-0.07141	-0.00011		-0.06745	-0.00017		-0.47872	0.010802
-0.06367	-0.00038		-0.06322	-0.00014		-0.05926	-0.00018		-0.47053	0.010457
-0.05548	-0.00038		-0.05503	-0.00017		-0.05107	-0.0002		-0.46234	0.010112
-0.04729	-0.00039		-0.04684	-0.00017		-0.04288	-0.00025		-0.45415	0.004501
-0.0391	-0.00039		-0.03865	-0.00014		-0.03469	-0.00023		-0.44596	0.000776
-0.03091	-0.0004		-0.03046	-4.6e-05		-0.0265	-0.00022		-0.43777	-0.00071
-0.02272	-0.00044		-0.02227	-2.8e-05		-0.01831	0.000362		-0.42958	0.001244
-0.01453	-0.00028		-0.01408	-2.5e-05		-0.01013	0.000372		-0.42139	0.007217
-0.00634	-2.6e-05		-0.00589	-4.3e-05		-0.00194	0.000227		-0.4132	0.005819
0.001851	0.000221		0.002301	-6.1e-05		0.006254	8.08e-05		-0.40502	0.004421
0.010041	0.000262		0.010491	6.96e-05		0.014444	-0.00021		-0.39683	0.001225
0.018231	0.000263		0.018681	0.00011		0.022634	-0.00024		-0.38864	-0.00096
0.026421	0.000259		0.026871	8.7e-05		0.030824	-0.00026		-0.38045	0.004613
0.03461	0.000256		0.03506	6.4e-05		0.039014	-0.00016		-0.37226	0.003871
0.0428	0.000227		0.04325	1.2e-05		0.047203	0.00026		-0.36407	0.003129
0.05099	0.000167		0.05144	-0.00014		0.055393	0.000666		-0.35588	0.000544
0.05918	-0.00051		0.05963	-0.00011		0.063583	0.000784		-0.34769	-0.00142
0.067369	-0.00061		0.06782	-0.0001		0.071773	0.000748		-0.3395	0.002498
0.075559	-0.00055		0.076009	-0.0001		0.079962	0.000712		-0.33131	0.002985
0.083749	-0.00055		0.084199	-0.0001		0.088152	0.000285		-0.32312	0.002485
0.091939	-0.00044		0.092389	-0.00016		0.096342	-0.00014		-0.31493	0.001984
0.100129	-0.00043		0.100579	-0.00023		0.104532	-0.00023		-0.30674	-0.00083
0.108318	-0.00043		0.108768	-0.00017		0.112722	-0.00018		-0.29855	0.002942
0.116508	-0.00043		0.116958	-0.00016		0.120911	-0.00016		-0.29036	0.003463
0.124698	-0.00028		0.125148	-0.00016		0.129101	-0.00018		-0.28217	0.003386
0.132888	-0.00026		0.133338	-0.00016		0.137291	-0.0002		-0.27398	0.003309
0.141078	-0.00025		0.141528	-0.00016		0.145481	-0.00025		-0.26579	0.003606
0.149267	-0.00026		0.149717	-0.00016		0.15367	-0.00042		-0.2576	0.008181
0.157457	-0.00026		0.157907	-0.00017		0.16186	-0.0004		-0.24941	0.008083
0.165647	-0.00028		0.166097	-0.00023		0.17005	-0.0003		-0.24122	0.007984
0.173837	-0.00034		0.174287	-0.00024		0.17824	-0.00029		-0.23303	0.007384
0.182026	-0.00047		0.182477	-0.00024		0.18643	-0.00029		-0.22484	0.00673
0.190216	-0.00055		0.190666	-0.00026		0.194619	-0.00029		-0.21665	0.00361
0.198406	-0.00062		0.198856	-0.00017		0.202809	-0.00029		-0.20846	-0.00022
0.206596	-0.00056		0.207046	-0.00017		0.210999	-0.00034		-0.20027	-0.00024
0.214786	-0.00056		0.215236	-0.00017		0.219189	-0.0003		-0.19208	-0.00025
0.222975	-0.00056		0.223425	-0.00017		0.227379	-0.0003		-0.18389	-0.00058
0.231165	-0.00056		0.231615	-0.00017		0.235568	-0.00029		-0.1757	-0.00011
0.239355	-0.00019		0.239805	-0.00018		0.243758	-0.00027		-0.16751	0.005406
0.247545	-5.8e-05		0.247995	-0.00019		0.251948	5.34e-05		-0.15932	0.005481
0.255735	-7.5e-07		0.256185	-0.00022		0.260138	5.08e-05		-0.15113	0.005079
0.263924	7.07e-07		0.264374	-0.0002		0.268327	4.83e-05		-0.14294	0.004677
0.272114	2.16e-06		0.272564	-0.00011		0.276517	4.17e-05		-0.13475	0.001586
0.280304	1.09e-06		0.280754	-0.00011		0.284707	8.49e-06		-0.12656	-0.00224
0.288494	9.58e-09		0.288944	-0.00011		0.292897	6.58e-06		-0.11837	-0.00389
0.296683	-6.5e-05		0.297134	-0.00011		0.301087	4.67e-06		-0.11018	-0.00188
0.304873	-0.00022		0.305323	-0.00012		0.309276	-5.7e-05		-0.10199	0.000897
0.313063	-0.00035		0.313513	-0.00015		0.317466	-0.00021		-0.0938	0.002642
0.321253	-0.00037		0.321703	-0.00012		0.325656	-0.00031		-0.08561	0.004631
0.329443	-0.0004		0.329893	-0.0001		0.333846	-0.00038		-0.07742	0.004375
0.337632	-0.00044		0.338082	-9.3e-05		0.342035	-0.00048		-0.06923	0.004119
0.345822	-0.00052		0.346272	-0.0001		0.350225	-0.00045		-0.06104	0.00344
0.354012	-0.00064		0.354462	-0.00011		0.358415	-0.00041		-0.05285	0.001461
0.362202	-0.00057		0.362652	-0.00014		0.366605	-0.0004		-0.04466	-0.00197
0.370392	-0.00054		0.370842	-0.00017		0.374795	-0.0004		-0.03647	-0.00302
0.378581	-0.00053		0.379031	-0.00019		0.382984	-0.0004		-0.02829	-0.00131
0.386771	-0.00051		0.387221	-0.0002		0.391174	-0.00041		-0.0201	0.000614
0.394961	-0.00045		0.395411	-0.0002		0.399364	-0.00037		-0.01191	0.000734
0.403151	-0.00037		0.403601	-0.00022		0.407554	-0.00035		-0.00372	0.000283
0.41134	-0.00028		0.411791	-0.00025		0.415744	-0.00035		0.004474	-0.00017
0.41953	-0.00027		0.41998	-0.00033		0.423933	-0.00037		0.012664	-0.00017
0.42772	-0.0003		0.42817	-0.00031		0.432123	-0.00038		0.020854	0.001544
0.43591	-0.00033		0.43636	-0.00026		0.440313	-0.00044		0.029043	0.002322
0.4441	-0.00039		0.44455	-0.00023		0.448503	-0.00041		0.037233	0.005561
0.452289	-0.00051		0.452739	-0.00022		0.456692	-0.00038		0.045423	0.006648
0.460479	-0.00045		0.460929	-0.00021		0.464882	-0.00038		0.053613	0.005606
0.468669	-0.00037		0.469119	-0.00021		0.473072	-0.00038		0.061802	0.004564
0.476859	-0.00036		0.477309	-0.00021		0.481262	-0.00038		0.069992	0.000864
0.485048	-0.00036		0.485499	-0.00021		0.489452	-0.00033		0.078182	0.004374
0.493238	-0.00036		0.493688	-0.00021		0.497641	-0.00033		0.086372	0.004723
0.501428	0.000102		0.501878	-0.00021		0.505831	-0.00033		0.094562	0.004553
0.509618	0.000186		0.510068	-0.00022		0.514021	-0.00033		0.102751	0.004383
0.517808	0.000191		0.518258	-0.00021		0.522211	-0.00023		0.110941	0.0015
0.525997	0.00018		0.526448	-0.00022		0.530401	-0.00021		0.119131	-0.0037
0.534187	0.000168		0.534637	-0.00022		0.53859	-0.00022		0.127321	-0.01041
0.542377	-0.00027		0.542827	-0.00023		0.54678	-0.00022		0.135511	-0.01379
0.550567	-0.00027		0.551017	-0.00019		0.55497	-0.00024		0.1437	-0.0143
0.558757	-0.00043		0.559207	-0.00015		0.56316	-0.00022		0.15189	-0.01309
0.566946	-0.00045		0.567396	-0.00013		0.571349	-0.00022		0.16008	-0.00781
0.575136	-0.00037		0.575586	-0.00012		0.579539	-0.00023		0.16827	-0.00141
0.583326	-0.00035		0.583776	-0.00012		0.587729	-0.00023		0.176459	-0.00033
0.591516	-0.00033		0.591966	-9.2e-05		0.595919	-0.00034		0.184649	0.000125
0.599705	-0.00023		0.600156	-8.4e-05		0.604109	-0.00033		0.192839	0.000585
0.607895	-0.00023		0.608345	-7.6e-05		0.612298	-0.00033		0.201029	0.001698
0.616085	-0.00023		0.616535	-7.7e-05		0.620488	-0.00033		0.209219	0.001502
0.624275	-0.00023		0.624725	-7.8e-05		0.628678	-0.00033		0.217408	0.001307
0.632465	-0.00024		0.632915	-7.9e-05		0.636868	-0.00033		0.225598	0.001199
0.640654	-0.00027		0.641105	-8.6e-05		0.645057	-0.00032		0.233788	0.000943
0.648844	-0.00033		0.649294	-0.00021		0.653247	-0.00032		0.241978	0.000688
0.657034	-0.00035		0.657484	-0.00014		0.661437	-0.00031		0.250168	-0.00146
0.665224	-0.00049		0.665674	-0.00014		0.669627	0.000717		0.258357	0.000651
0.673414	-0.00028		0.673864	-0.00016		0.677817	0.002309		0.266547	0.00135
0.681603	-0.00024		0.682053	-0.00017		0.686006	0.002886		0.274737	0.000257
0.689793	-0.00023		0.690243	-0.00019		0.694196	0.003464		0.282927	-0.00084
0.697983	-0.00025		0.698433	-0.00018		0.702386	0.003485		0.291116	-0.00044
0.706173	-0.00026		0.706623	-0.00017		0.710576	0.003483		0.299306	-0.00036
0.714362	-0.0003		0.714813	-0.00017		0.718766	0.003481		0.307496	-0.00112
0.722552	-0.0003		0.723002	-0.00017		0.726955	0.003073		0.315686	-0.00188
0.730742	-0.00027		0.731192	-0.00018		0.735145	2.71e-05		0.323876	-0.00101
0.738932	-0.00027		0.739382	-0.00018		0.743335	-0.00022		0.332065	-0.00058
0.747122	-0.00026		0.747572	-0.00021		0.751525	-0.00017		0.340255	-0.00173
0.755311	-0.00025		0.755762	-0.00018		0.759714	-0.00012		0.348445	-0.00288
0.763501	-0.00025		0.763951	-0.00016		0.767904	-1.6e-05		0.356635	-0.00218
0.771691	-0.00026		0.772141	-0.00016		0.776094	0.000278		0.364825	0.000378
0.779881	-0.00026		0.780331	-0.00016		0.784284	0.000302		0.373014	0.00133
0.788071	-0.00036		0.788521	-0.00016		0.792474	0.000303		0.381204	0.001558
0.79626	-0.00035		0.79671	-0.00014		0.800663	0.000146		0.389394	0.001238
0.80445	-0.00029		0.8049	-0.00016		0.808853	-1e-05		0.397584	0.000919
0.81264	-0.00013		0.81309	-0.00017		0.817043	-0.00015		0.405773	0.004861
0.82083	-5.7e-05		0.82128	-0.0002		0.825233	-0.00033		0.413963	0.004422
0.829019	-0.00012		0.82947	-0.00019		0.833423	-0.00037		0.422153	0.003983
0.837209	-0.00019		0.837659	-0.00021		0.841612	-0.00028		0.430343	0.002566
0.845399	-0.00035		0.845849	-0.00022		0.849802	-0.00018		0.438533	0.004896
0.853589	-0.00036		0.854039	-0.00026		0.857992	-0.00017		0.446722	0.005399
0.861779	-0.00037		0.862229	-0.00019		0.866182	-0.00016		0.454912	0.005403
0.869968	-0.00034		0.870419	-0.00017		0.874371	-0.00018		0.463102	0.004137
0.878158	-0.00032		0.878608	-0.00016		0.882561	-0.00019		0.471292	0.002872
0.886348	-0.00032		0.886798	-0.00016		0.890751	-0.00028		0.479482	0.002771
0.894538	-0.00032		0.894988	3.36e-05		0.898941	-0.00033		0.487671	0.002289
0.902728	-0.00033		0.903178	0.000145		0.907131	-0.00023		0.495861	0.001808
0.910917	-0.00038		0.911367	0.000164		0.91532	6e-05		0.504051	-0.0021
0.919107	-0.00039		0.919557	0.000171		0.92351	0.000411		0.512241	-0.0029
0.927297	-0.00039		0.927747	5.49e-05		0.9317	0.000745		0.52043	-0.00182
0.935487	-0.0005		0.935937	-6.1e-05		0.93989	0.001098		0.52862	0.00052
0.943676	-0.00061		0.944127	-6.1e-05		0.948079	0.001174		0.53681	0.005699
0.951866	-0.00057		0.952316	-6.1e-05		0.956269	0.001209		0.545	0.005588
0.960056	-0.00057		0.960506	-6.3e-05		0.964459	0.000605		0.55319	0.005476
0.968246	-0.00057		0.968696	-0.00016		0.972649	5.75e-07		0.561379	0.003764
0.976436	-0.00058		0.976886	-1.1e-05		0.980839	-5e-07		0.569569	0.000321
0.984625	-0.0005		0.985076	3.83e-05		0.989028	-1.6e-06		0.577759	-0.00238
0.992815	-0.00047		0.993265	5.56e-05		0.997218	-4.1e-06		0.585949	-0.00289
1.001	-0.00046		1.00145	4.88e-05		1.00541	-4.6e-05		0.594138	-0.00331
1.0092	-0.00045		1.00964	4.19e-05		1.0136	-6e-05		0.602328	-0.00373
1.01738	-0.00044		1.01784	2.68e-05		1.02179	-7.4e-05		0.610518	-0.00515
1.02557	-0.00043		1.02602	-0.00011		1.02998	-0.0001		0.618708	-0.00251
1.03376	-0.00042		1.03421	-0.00013		1.03817	-0.00024		0.626898	0.002601
1.04195	-0.0004		1.0424	-0.00014		1.04636	-0.00025		0.635087	0.003604
1.05014	-0.00039		1.05059	-0.00017		1.05455	-0.00027		0.643277	0.003854
1.05833	-0.00039		1.05878	-0.00016		1.06274	-0.00029		0.651467	0.001472
1.06652	-0.00021		1.06697	-0.00015		1.07093	-0.00027		0.659657	-0.00091
1.07471	-0.00011		1.07516	-0.00014		1.07912	-0.00026		0.667847	-0.00572
1.0829	-0.00011		1.08335	-0.00017		1.08731	-0.00026		0.676036	-0.0067
1.09109	-0.00011		1.09154	-0.0002		1.0955	-0.00026		0.684226	-0.00511
1.09928	-0.00015		1.09973	-0.00026		1.10369	-0.00022		0.692416	-0.00142
1.10747	-0.00025		1.10792	0.000162		1.11187	-0.0002		0.700606	0.000832
1.11566	-0.00035		1.11611	0.000197		1.12007	-0.00019		0.708795	0.001921
1.12385	-0.00045		1.1243	0.000141		1.12826	-0.00019		0.716985	-0.00069
1.13204	-0.00037		1.13249	8.5e-05		1.13644	-0.00013		0.725175	-0.0033
1.14023	-0.00032		1.14068	-3.6e-05		1.14463	-7.7e-05		0.733365	-0.00582
1.14842	-0.00033		1.14887	-5.5e-05		1.15282	-2.1e-05		0.741555	-0.0043
1.15661	-0.00033		1.15706	-7.4e-05		1.16101	0.000168		0.749744	-0.00367
1.1648	-0.00036		1.16525	-9.7e-05		1.1692	0.000231		0.757934	-0.00305
1.17299	-0.00052		1.17344	-0.00012		1.17739	0.000294		0.766124	-0.00221
1.18118	-0.00048		1.18163	-0.00017		1.18558	0.00045		0.774314	5.74e-05
1.18937	-0.00039		1.18982	-0.00017		1.19377	0.000646		0.782504	0.002508
1.19756	-0.0003		1.19801	-0.00018		1.20196	0.000724		0.790693	0.004672
1.20575	-0.00025		1.2062	-0.00018		1.21015	0.000702		0.798883	0.006239
1.21394	-0.00023		1.21439	-0.00024		1.21834	0.00068		0.807073	0.006724
1.22213	-0.00023		1.22258	-6.1e-05		1.22653	0.000616		0.815263	0.006485
1.23032	-0.00024		1.23077	-6e-05		1.23472	0.000292		0.823452	0.006246
1.23851	-0.00042		1.23896	-6.4e-05		1.24291	-0.00015		0.831642	0.001653
1.2467	-0.00057		1.24715	-6.9e-05		1.2511	-8.2e-05		0.839832	-0.00187
1.25489	-0.0003		1.25534	-0.00016		1.25929	-8.1e-05		0.848022	0.017648
1.26308	-0.00028		1.26353	-0.00015		1.26748	-8e-05		0.856212	0.13006
1.27127	-0.00027		1.27172	-0.00015		1.27567	9.78e-06		0.864401	0.128147
1.27946	-0.00025		1.27991	-0.00016		1.28386	5.17e-05		0.872591	0.126234
1.28765	-0.00024		1.2881	-0.00017		1.29205	6.05e-05		0.880781	0.078067
1.29584	-8.1e-05		1.29629	-0.00026		1.30024	6.46e-05		0.888971	0.062124
1.30403	-6.4e-05		1.30448	-0.00026		1.30843	6.48e-05		0.897161	0.056302
1.31222	-5.7e-05		1.31267	-0.00027		1.31662	6.45e-05		0.90535	0.05048
1.32041	-0.00011		1.32086	-0.00028		1.32481	6.43e-05		0.91354	0.02883
1.3286	-0.00017		1.32905	-0.00021		1.333	5.92e-05		0.92173	0.010031
1.33679	-0.0004		1.33724	-0.0001		1.34119	-0.00011		0.92992	0.005461
1.34498	-0.00034		1.34543	-8.1e-05		1.34938	-3.3e-05		0.938109	-0.00055
1.35317	-0.00034		1.35362	2.64e-06		1.35757	-1.3e-06		0.946299	-0.00333
1.36136	-0.00034		1.36181	0.000111		1.36576	-2.1e-06		0.954489	-4.7e-05
1.36955	-0.00034		1.37	0.000219		1.37395	-2.9e-06		0.962679	0.005017
1.37773	-0.00045		1.37818	0.00023		1.38214	-6.2e-06		0.970869	0.00685
1.38593	-0.00045		1.38637	0.000234		1.39033	-7.1e-05		0.979058	0.007768
1.39411	-0.00045		1.39457	0.000228		1.39852	-0.00017		0.987248	0.005732
1.4023	-0.00045		1.40275	0.000223		1.40671	-7e-05		0.995438	0.003696
1.41049	-0.00039		1.41094	0.000165		1.4149	-6.9e-05		1.00363	0.00095
1.41868	-0.00038		1.41913	0.000164		1.42309	-7e-05		1.01182	0.001628
1.42687	-0.00037		1.42732	0.000164		1.43128	-7.1e-05		1.02001	0.005501
1.43506	-0.00036		1.43551	0.000162		1.43947	-7.4e-05		1.0282	0.005523
1.44325	-0.00036		1.4437	0.000157		1.44766	-0.0001		1.03639	0.00533
1.45144	-0.00036		1.45189	8.39e-05		1.45585	-0.00017		1.04458	0.005138
1.45963	-0.00037		1.46008	6.49e-05		1.46404	-0.00019		1.05277	0.005524
1.46782	-0.00053		1.46827	0.000104		1.47223	-0.0002		1.06096	0.005052
1.47601	-0.00037		1.47646	0.000101		1.48042	-0.00025		1.06915	0.004579
1.4842	-0.00032		1.48465	9.8e-05		1.4886	-0.00028		1.07734	0.004229
1.49239	-0.00027		1.49284	9.13e-05		1.4968	-0.00016		1.08553	0.00669
1.50058	-0.00022		1.50103	-1.8e-05		1.50499	-0.00014		1.09371	0.0084
1.50877	-0.00012		1.50922	4.8e-05		1.51317	-0.00014		1.1019	0.008204
1.51696	-0.0001		1.51741	7.55e-05		1.52136	-0.00014		1.1101	0.008007
1.52515	-0.00013		1.5256	0.000103		1.52955	-0.00016		1.11828	0.007293
1.53334	-0.00016		1.53379	0.000107		1.53774	-0.00021		1.12647	0.003975
1.54153	-0.00023		1.54198	0.000154		1.54593	-0.0003		1.13466	0.001573
1.54972	-0.00031		1.55017	0.000157		1.55412	-0.00025		1.14285	0.000303
1.55791	-0.00032		1.55836	0.000151		1.56231	-0.00024		1.15104	0.000124
1.5661	-0.00032		1.56655	0.000144		1.5705	-0.00023		1.15923	0.002147
1.57429	-0.00032		1.57474	0.000102		1.57869	-0.00023		1.16742	0.004775
1.58248	-0.0002		1.58293	0.0001		1.58688	-0.00015		1.17561	0.005809
1.59067	-7.8e-05		1.59112	9.91e-05		1.59507	-0.00015		1.1838	0.006098
1.59886	-2.8e-05		1.59931	9.41e-05		1.60326	-0.00015		1.19199	0.003708
1.60705	7.15e-05		1.6075	0.000184		1.61145	-0.00013		1.20018	0.001319
1.61524	0.000283		1.61569	0.000238		1.61964	-6.2e-05		1.20837	-0.00073
1.62343	0.000342		1.62388	0.000265		1.62783	-1.1e-05		1.21656	-0.00054
1.63162	0.000344		1.63207	0.000271		1.63602	-3.8e-05		1.22475	-0.00036
1.63981	0.000337		1.64026	0.000272		1.64421	-6.4e-05		1.23294	-5.5e-05
1.648	0.000329		1.64845	0.000271		1.6524	-0.00012		1.24113	0.005502
1.65619	6.51e-05		1.65664	0.000269		1.66059	-0.00023		1.24932	0.005697
1.66438	-0.00038		1.66483	0.000259		1.66878	-0.00027		1.25751	0.00476
1.67257	-0.00024		1.67302	0.000147		1.67697	-0.0003		1.2657	0.003822
1.68076	-0.00013		1.68121	0.000158		1.68516	-0.00021		1.27389	-0.00479
1.68895	0.000121		1.6894	0.000121		1.69335	-0.00018		1.28208	-0.01047
1.69714	0.000177		1.69759	8.39e-05		1.70154	-0.00016		1.29027	-0.01077
1.70533	0.000233		1.70578	8.84e-06		1.70973	-0.00016		1.29846	-0.00808
1.71352	0.000384		1.71397	-4.8e-05		1.71792	-0.00016		1.30665	-0.00227
1.72171	0.000477		1.72216	8.95e-05		1.72611	-0.00016		1.31484	6.93e-05
1.7299	0.000487		1.73035	9.09e-05		1.7343	-0.00019		1.32303	0.000636
1.73809	0.000482		1.73854	9.08e-05		1.74249	-0.00015		1.33122	0.000764
1.74628	0.000478		1.74673	9.06e-05		1.75068	-0.00015		1.33941	0.000893
1.75446	0.000793		1.75492	-0.00011		1.75887	-0.00015		1.3476	0.000272
1.76266	0.000794		1.7631	-7.1e-05		1.76706	-0.00015		1.35579	-0.00035
1.77085	0.00079		1.7713	-6.9e-05		1.77525	0.000332		1.36398	-0.00181
1.77903	0.000785		1.77948	-7.3e-05		1.78344	0.000305		1.37217	-0.0074
1.78722	0.000766		1.78767	-7.8e-05		1.79163	0.000279		1.38036	-0.01148
1.79541	0.000534		1.79586	-7.8e-05		1.79982	0.000205		1.38855	-0.01166
1.8036	0.000629		1.80405	-7.8e-05		1.80801	5.16e-05		1.39674	-0.00649
1.81179	0.000631		1.81224	-7.9e-05		1.8162	-0.00022		1.40493	0.002138
1.81998	0.000618		1.82043	-3e-05		1.82439	-0.00025		1.41312	0.000705
1.82817	0.000606		1.82862	-3e-05		1.83258	5.26e-05		1.42131	-0.00073
1.83636	0.000287		1.83681	-3e-05		1.84077	8.15e-05		1.4295	-0.00387
1.84455	-0.00025		1.845	-3e-05		1.84896	3.6e-05		1.43769	-0.00623
1.85274	-7.7e-05		1.85319	-3.8e-05		1.85715	-9.4e-06		1.44588	-0.00222
1.86093	7.01e-06		1.86138	-7.6e-05		1.86533	-0.00011		1.45407	0.00179
1.86912	4.62e-05		1.86957	-5.8e-05		1.87353	-0.00028		1.46226	0.002783
1.87731	5.99e-05		1.87776	-5e-05		1.88172	-0.00021		1.47045	0.003846
1.8855	5.48e-05		1.88595	-4.9e-05		1.8899	-0.00013		1.47863	0.004317
1.89369	4.97e-05		1.89414	-6.4e-05		1.89809	-4.4e-05		1.48683	0.004541
1.90188	3.84e-05		1.90233	-8e-05		1.90628	-4.3e-05		1.49501	0.004764
1.91007	-9.6e-05		1.91052	-7.6e-05		1.91447	-4.6e-05		1.5032	0.004928
1.91826	0.00023		1.91871	-8e-05		1.92266	-4.9e-05		1.51139	0.004875
1.92645	0.00027		1.9269	-8.4e-05		1.93085	-0.0001		1.51958	0.004823
1.93464	0.000268		1.93509	-0.00011		1.93904	-0.00019		1.52777	0.004165
1.94283	0.000266		1.94328	-0.00012		1.94723	-0.00025		1.53596	0.002615
1.95102	0.000261		1.95147	-0.00013		1.95542	-0.00032		1.54415	0.00333
1.95921	0.000241		1.95966	-0.00016		1.96361	-0.00019		1.55234	0.004331
1.9674	0.000221		1.96785	-0.00013		1.9718	0.000112		1.56053	0.004432
1.97559	0.000179		1.97604	-6.8e-05		1.97999	0.000118		1.56872	0.002409
1.98378	0.000483		1.98423	-5.8e-05		1.98818	6.6e-05		1.57691	0.000386
1.99197	0.000552		1.99242	-5.5e-05		1.99637	1.39e-05		1.5851	-0.00179
2.00016	0.000546		2.00061	-5.1e-05		2.00456	-0.00024		1.59329	-0.00086
2.00835	0.00054		2.0088	8.9e-05		2.01275	-0.00032		1.60148	-0.00015
2.01654	0.000502		2.01699	0.000303		2.02094	-0.00035		1.60967	0.002346
2.02473	0.000424		2.02518	0.000405		2.02913	-0.00039		1.61786	0.008094
2.03292	0.000345		2.03337	0.000441		2.03732	-0.00034		1.62605	0.008466
2.04111	0.000129		2.04156	0.00043		2.04551	-0.0003		1.63424	0.007973
2.0493	0.000276		2.04975	0.000419		2.0537	-0.00027		1.64243	0.007479
2.05749	0.000349		2.05794	0.000317		2.06189	-0.00021		1.65062	0.004186
2.06568	0.000355		2.06613	0.000264		2.07008	-9.7e-05		1.65881	0.006509
2.07387	0.000352		2.07432	0.000211		2.07827	-2e-06		1.667	0.011585
2.08206	0.000349		2.08251	0.00013		2.08646	0.000189		1.67519	0.013831
2.09025	0.000311		2.0907	9.67e-05		2.09465	0.000197		1.68338	0.014871
2.09844	0.000231		2.09889	8.24e-05		2.10284	0.000206		1.69157	0.013234
2.10663	6.41e-05		2.10708	6.82e-05		2.11103	0.00054		1.69976	0.011597
2.11482	4.61e-05		2.11527	3.18e-05		2.11922	0.000685		1.70795	0.008551
2.12301	-8.7e-05		2.12346	1.82e-05		2.12741	0.000718		1.71614	0.00469
2.13119	-0.00022		2.13165	4.59e-06		2.1356	0.000733		1.72433	0.002842
2.13938	-0.00012		2.13984	-0.00011		2.14379	0.000456		1.73252	0.004977
2.14757	-3.3e-05		2.14803	-4.5e-05		2.15198	0.000178		1.74071	0.009367
2.15577	-1.8e-05		2.15621	1.3e-05		2.16017	-0.00023		1.7489	0.011386
2.16395	0.002897		2.1644	1.92e-05		2.16836	-0.00019		1.75709	0.011771
2.17214	0.003139		2.17259	1.53e-05		2.17655	-7.4e-05		1.76528	0.010253
2.18033	0.00315		2.18078	1.14e-05		2.18474	0.000273		1.77347	0.008734
2.18852	0.003117		2.18897	-0.00014		2.19293	0.001001		1.78166	0.006454
2.19671	0.003084		2.19716	7.52e-06		2.20112	0.001318		1.78985	0.004346
2.2049	0.002496		2.20535	5.6e-05		2.20931	0.001267		1.79804	0.003865
2.21309	0.001907		2.21354	7.58e-05		2.2175	0.001215		1.80623	0.003594
2.22128	0.001436		2.22173	6.1e-05		2.22569	0.001054		1.81442	0.003323
2.22947	0.001337		2.22992	4.63e-05		2.23388	0.002834		1.82261	0.001944
2.23766	0.001237		2.23811	4.03e-05		2.24207	0.003432		1.8308	0.000102
2.24585	0.000885		2.2463	3.44e-05		2.25026	0.002624		1.83899	0.001874
2.25404	0.000563		2.25449	-8e-05		2.25845	0.001815		1.84718	0.006133
2.26223	0.000528		2.26268	-0.00018		2.26663	1e-05		1.85536	0.009737
2.27042	0.000493		2.27087	-9.6e-05		2.27482	-3.3e-05		1.86356	0.009229
2.27861	0.000352		2.27906	-5.6e-05		2.28301	-1e-05		1.87174	0.00872
2.2868	0.000567		2.28725	-4.7e-05		2.2912	1.29e-05		1.87993	0.007095
2.29499	0.000515		2.29544	-0.00012		2.29939	2.22e-05		1.88812	0.003474
2.30318	0.000463		2.30363	-0.0002		2.30758	7.28e-06		1.89631	0.002097
2.31137	0.000353		2.31182	-0.0001		2.31577	-7.7e-06		1.9045	0.002075
2.31956	0.000132		2.32001	-5.4e-05		2.32396	-4.1e-05		1.91269	0.003195
2.32775	2.46e-05		2.3282	-6.6e-05		2.33215	7.55e-05		1.92088	0.004299
2.33594	2.29e-05		2.33639	-7.7e-05		2.34034	0.000125		1.92907	0.004028
2.34413	2.12e-05		2.34458	-0.00012		2.34853	8.95e-05		1.93726	0.003757
2.35232	-3.3e-06		2.35277	-0.0002		2.35672	5.42e-05		1.94545	0.003047
2.36051	-6.5e-05		2.36096	-0.00023		2.36491	-1.9e-05		1.95364	0.000387
2.3687	-7.4e-05		2.36915	-0.00018		2.3731	-2.5e-05		1.96183	-0.00057
2.37689	-8.3e-05		2.37734	-0.00016		2.38129	-3.1e-05		1.97002	0.001457
2.38508	-0.00024		2.38553	-0.00014		2.38948	-0.00027		1.97821	0.003766
2.39327	-0.00042		2.39372	-0.00012		2.39767	-0.00038		1.9864	0.003932
2.40146	-0.00042		2.40191	-0.00012		2.40586	-0.0004		1.99459	0.003906
2.40965	-0.00043		2.4101	-0.00012		2.41405	-0.00032		2.00278	0.003881
2.41784	-0.00045		2.41829	-0.00013		2.42224	-0.00032		2.01097	-0.00048
2.42603	-0.0005		2.42648	5.84e-05		2.43043	-0.00032		2.01916	-0.00282
2.43422	-0.00058		2.43467	0.000142		2.43862	-0.00032		2.02735	-0.00343
2.44241	-0.00049		2.44286	0.000132		2.44681	-0.00027		2.03554	-0.00429
2.4506	-0.00049		2.45105	0.000122		2.455	-4.8e-05		2.04373	-0.00507
2.45879	-0.00048		2.45924	-0.00011		2.46319	-4.5e-05		2.05192	-0.00479
2.46698	-0.00042		2.46743	-9.3e-05		2.47138	-4.5e-05		2.06011	-0.0023
2.47517	-0.0004		2.47562	-9.4e-05		2.47957	-4.5e-05		2.0683	-0.00116
2.48336	-0.00037		2.48381	-9.6e-05		2.48776	3.84e-05		2.07649	-0.00064
2.49155	-0.00028		2.492	-0.00015		2.49595	0.00036		2.08468	-0.00013
2.49973	-0.00019		2.50019	-0.00026		2.50414	0.000343		2.09287	5.39e-05
2.50793	-2.1e-05		2.50838	-0.0002		2.51233	0.000325		2.10106	0.00387
2.51612	2.52e-05		2.51656	-5.5e-05		2.52052	0.000276		2.10925	0.005777
2.52431	3.4e-05		2.52475	-5.7e-05		2.52871	0.000181		2.11744	0.004893
2.53249	3.66e-05		2.53294	-5.8e-05		2.5369	6.58e-05		2.12563	0.004009
2.54068	3e-05		2.54114	-6.2e-05		2.54509	-4.9e-05		2.13382	-0.00202
2.54887	2.34e-05		2.54933	-8.6e-05		2.55328	-0.00026		2.14201	-0.00282
2.55706	-9.7e-05		2.55751	-0.00014		2.56147	-0.00026		2.1502	-0.00484
2.56525	-0.00054		2.5657	-0.00013		2.56966	2.45e-05		2.15839	-0.00488
2.57344	-0.00053		2.57389	-0.00013		2.57785	0.000115		2.16658	-0.00329
2.58163	-0.00053		2.58208	-0.00013		2.58604	0.000116		2.17477	-0.00259
2.58982	-0.00053		2.59027	-0.00012		2.59423	9.98e-05		2.18296	-0.00322
2.59801	-0.00052		2.59846	-0.00012		2.60242	8.35e-05		2.19115	-0.00385
2.6062	-0.0005		2.60665	-0.00011		2.61061	-0.00022		2.19934	0.000529
2.61439	-0.00039		2.61484	-0.0001		2.61879	-0.00027		2.20753	-0.00129
2.62258	-0.00037		2.62303	-0.00012		2.62698	-0.00027		2.21572	-0.0031
2.63077	-0.00037		2.63122	-0.00013		2.63517	-0.00028		2.22391	-0.00731
2.63896	-0.00037		2.63941	-0.00016		2.64337	-0.00031		2.2321	-0.00955
2.64715	-0.00038		2.6476	-0.00022		2.65155	-0.00038		2.24029	-0.00576
2.65534	-0.00055		2.65579	-0.00022		2.65974	-0.00037		2.24848	-0.00389
2.66353	-0.0006		2.66398	-0.00023		2.66793	-0.00028		2.25666	-0.00345
2.67172	-0.00043		2.67217	-0.00024		2.67612	-0.00022		2.26485	0.000153
2.67991	-0.00035		2.68036	-0.00027		2.68431	-0.0001		2.27304	0.00054
2.6881	-0.0002		2.68855	-0.00025		2.6925	-8.9e-05		2.28123	0.000928
2.69629	-0.00019		2.69674	-0.00024		2.70069	-9.4e-05		2.28942	0.003514
2.70448	-0.0002		2.70493	-0.00025		2.70888	-0.0001		2.29761	0.007245
2.71267	-0.0002		2.71312	-0.00025		2.71707	-0.00028		2.3058	0.010717
2.72086	-0.00022		2.72131	-0.00029		2.72526	-0.00037		2.31399	0.04173
2.72905	-0.00021		2.7295	-0.00031		2.73345	-0.00036		2.32218	0.060865
2.73724	-0.00021		2.73769	-0.00016		2.74164	-0.00025		2.33037	0.05792
2.74543	-0.00023		2.74588	-4.4e-05		2.74983	1.3e-05		2.33856	0.054975
2.75362	-0.00025		2.75407	-2.8e-05		2.75802	0.00019		2.34675	0.011264
2.76181	-0.00035		2.76226	-2.4e-05		2.76621	0.000145		2.35494	0.002861
2.77	-0.00033		2.77045	-2.1e-05		2.7744	0.0001		2.36313	-0.00081
2.77819	-0.00024		2.77864	2.77e-05		2.78259	-4e-05		2.37132	-0.00363
2.78638	-0.00023		2.78683	4.35e-05		2.79078	-0.00024		2.37951	-0.00025
2.79457	-0.00023		2.79502	4.37e-05		2.79897	-0.00028		2.3877	0.00604
2.80276	-0.00023		2.80321	4.38e-05		2.80716	-0.00027		2.39589	0.006608
2.81095	-0.00024		2.8114	0.001941		2.81535	-0.00024		2.40408	0.007176
2.81914	-0.00027		2.81959	0.00288		2.82354	-0.00013		2.41227	0.009944
2.82733	-0.00035		2.82778	0.002651		2.83173	0.002514		2.42046	0.009875
2.83552	-0.00039		2.83597	0.002422		2.83992	0.003788		2.42865	0.009806
2.84371	-0.0005		2.84416	0.001027		2.84811	0.004252		2.43684	0.007702
2.8519	-0.00052		2.85235	0.000519		2.8563	0.004415		2.44503	0.000526
2.86009	-0.00064		2.86054	0.000111		2.86449	0.003317		2.45322	-0.00177
2.86828	-0.00067		2.86873	0.000302		2.87268	0.002218		2.46141	-0.00045
2.87647	-0.00068		2.87692	0.000433		2.88087	8.86e-06		2.4696	0.001272
2.88465	-0.0007		2.88511	0.000424		2.88906	-1.1e-05		2.47779	0.00528
2.89284	-0.00065		2.8933	0.000416		2.89725	-3.1e-05		2.48598	0.005732
2.90103	-0.00063		2.90149	0.000394		2.90544	-0.00019		2.49417	0.005956
2.90923	-0.00061		2.90968	0.000287		2.91363	-0.0002		2.50236	0.005628
2.91741	-0.0006		2.91786	0.000111		2.92182	-0.0002		2.51055	0.0053
2.9256	-0.00059		2.92605	0.000105		2.93001	-0.00029		2.51874	0.004419
2.93379	-0.00054		2.93425	3.5e-05		2.9382	7.04e-05		2.52693	-0.00076
2.94198	2.52e-05		2.94243	0.00348		2.94639	0.000109		2.53512	-0.00225
2.95017	3.22e-05		2.95062	0.004938		2.95458	9.93e-05		2.54331	0.00221
2.95836	-2.1e-05		2.95881	0.005074		2.96277	9.01e-05		2.5515	0.003249
2.96655	-7.4e-05		2.967	0.003644		2.97096	-4.9e-05		2.55969	0.003572
2.97474	-0.00018		2.97519	0.002214		2.97915	-5.1e-05		2.56788	0.002485
2.98293	-0.00027		2.98338	0.000916		2.98734	-5.3e-05		2.57607	0.001398
2.99112	-0.00035		2.99157	0.000716		2.99553	-5.8e-05		2.58426	0.000682
2.99931	-0.00036		2.99976	0.000619		3.00372	-0.00019		2.59245	0.00097
3.0075	-0.00038		3.00795	0.000204		3.01191	-0.00023		2.60064	0.002964
3.01569	-0.00043		3.01614	6.77e-05		3.02009	-0.00021		2.60882	0.006347
3.02388	-0.00056		3.02433	-6.9e-05		3.02828	-0.00022		2.61701	0.007053
3.03207	-0.00053		3.03252	-3.4e-06		3.03647	-0.00023		2.6252	0.006973
3.04026	1.86e-05		3.04071	1.95e-05		3.04466	-0.00025		2.6334	0.006893
3.04845	8.26e-05		3.0489	4.24e-05		3.05285	-0.00033		2.64159	0.004946
3.05664	8.46e-05		3.05709	0.000156		3.06104	-0.00039		2.64977	0.003779
3.06483	8.4e-05		3.06528	0.000208		3.06923	-0.00036		2.65796	0.001612
3.07302	8.34e-05		3.07347	0.000219		3.07742	-0.00022		2.66615	-0.00271
3.08121	5.24e-05		3.08166	0.00011		3.08561	-0.00022		2.67434	-0.00612
3.0894	-0.0003		3.08985	2.03e-06		3.0938	-0.00019		2.68253	-0.00432
3.09759	-0.00036		3.09804	7.81e-05		3.10199	-0.00018		2.69072	0.00078
3.10578	-0.00041		3.10623	0.000114		3.11018	-0.00017		2.69891	0.000777
3.11397	-0.00056		3.11442	9.37e-05		3.11837	-6.8e-05		2.7071	0.000773
3.12216	-0.00034		3.12261	7.31e-05		3.12656	0.001051		2.71529	-0.00035
3.13035	-0.00031		3.1308	2.43e-05		3.13475	0.001146		2.72348	-0.00112
3.13854	-0.00032		3.13899	5.95e-06		3.14294	0.001003		2.73167	0.000464
3.14673	-0.00033		3.14718	-1.2e-05		3.15113	0.000859		2.73986	0.004623
3.15492	-0.00037		3.15537	-6.3e-05		3.15932	3.84e-05		2.74805	0.007628
3.16311	-0.00046		3.16356	-0.00016		3.16751	6.13e-05		2.75624	0.008987
3.1713	-0.00055		3.17175	-8.5e-05		3.1757	-6.7e-06		2.76443	0.009606
3.17949	-0.00065		3.17994	-6.2e-05		3.18389	-7.5e-05		2.77262	0.009855
3.18768	-0.00058		3.18813	-6.1e-05		3.19208	-0.00022		2.78081	0.007732
3.19587	-0.00055		3.19632	-6.2e-05		3.20027	-0.00017		2.789	0.005609
3.20406	-0.00043		3.20451	-6.3e-05		3.20846	-0.00017		2.79719	0.000704
3.21225	-0.00042		3.2127	-6.8e-05		3.21665	-0.00017		2.80538	-0.0015
3.22044	-0.00042		3.22089	-0.00013		3.22484	-0.00018		2.81357	-0.00075
3.22863	-0.00042		3.22908	-0.00014		3.23303	-0.00031		2.82176	0.00066
3.23682	-0.00015		3.23727	-0.0001		3.24122	-0.00044		2.82995	0.001521
3.24501	0.001575		3.24546	-8.6e-05		3.24941	-0.00031		2.83814	0.001552
3.2532	0.002363		3.25365	-8.5e-05		3.2576	-0.00029		2.84633	0.000581
3.26139	0.001844		3.26184	-8.4e-05		3.26579	-0.00023		2.85452	-0.00039
3.26958	0.001324		3.27003	-9e-05		3.27398	1.28e-05		2.86271	-0.00056
3.27777	4.34e-05		3.27822	-9.5e-05		3.28217	2.08e-05		2.8709	-0.00116
3.28595	-0.00016		3.2864	-0.00012		3.29036	-1.4e-05		2.87909	-0.00175
3.29414	-0.0002		3.2946	-0.00023		3.29855	-4.9e-05		2.88728	-0.00573
3.30233	-0.00024		3.30279	-0.00016		3.30674	-0.00026		2.89547	-0.00628
3.31052	-0.0005		3.31098	-0.00012		3.31493	-0.00026		2.90366	-0.00403
3.31871	-0.00074		3.31916	-0.0001		3.32312	-0.00029		2.91185	0.000149
3.3269	-0.00073		3.32735	-9.2e-05		3.33131	-0.00035		2.92004	0.00289
3.33509	-0.00044		3.33554	-9.2e-05		3.3395	-0.0003		2.92823	0.004092
3.34328	-0.00035		3.34373	-9.2e-05		3.34769	-0.00016		2.93642	0.002019
3.35147	-0.00034		3.35192	-0.00011		3.35588	-0.00013		2.94461	-5.4e-05
3.35966	-0.00034		3.36011	-0.00018		3.36407	-0.00011		2.9528	-0.00261
3.36785	-0.00034		3.3683	-0.00014		3.37226	-0.00021		2.96099	-0.00271
3.37604	-0.00034		3.37649	-0.00012		3.38044	-0.00031		2.96918	-0.0028
3.38423	-0.00035		3.38468	-0.00011		3.38863	-0.00036		2.97737	-0.00586
3.39242	-0.00037		3.39287	-0.00011		3.39683	-0.00033		2.98556	-0.0024
3.40061	-0.00043		3.40106	-0.00013		3.40502	-0.00022		2.99375	0.00491
3.4088	-0.00045		3.40925	-0.00014		3.4132	-0.0002		3.00194	0.003727
3.41699	-0.00046		3.41744	-0.00018		3.42139	-0.0002		3.01012	0.002544
3.42518	-0.00051		3.42563	-0.00019		3.42958	-0.00019		3.01831	-0.00059
3.43337	-0.00063		3.43382	-0.0002		3.43777	-0.0001		3.0265	-0.0059
3.44156	-0.00062		3.44201	-0.00023		3.44596	-0.0001		3.03469	-0.00505
3.44975	-0.00062		3.4502	-0.00026		3.45415	-0.00011		3.04288	-0.00247
3.45794	-0.00062		3.45839	-0.00012		3.46234	-0.00011		3.05107	0.000362
3.46613	-0.00063		3.46658	-0.00011		3.47053	-0.00013		3.05926	0.00192
3.47432	-0.00044		3.47477	-9.8e-05		3.47872	-0.00028		3.06745	0.002472
3.48251	-0.00036		3.48296	-9e-05		3.48691	-0.00028		3.07564	0.002188
3.4907	-0.00029		3.49115	-3e-05		3.4951	-0.00028		3.08383	0.001903
3.49889	-0.00024		3.49934	0.000208		3.50329	-0.00048		3.09202	0.001854
3.50708	-0.00024		3.50753	0.000207		3.51148	-0.00048		3.10021	0.001805
3.51527	-0.00028		3.51572	0.000206		3.51967	-0.00048		3.1084	0.001076
3.52346	-0.00033		3.52391	0.000202		3.52786	-0.0005		3.11659	0.000424
3.53165	-0.00042		3.5321	9.03e-05		3.53605	-0.00054		3.12478	-0.00024
3.53984	-0.00033		3.54029	-0.00014		3.54424	-0.00054		3.13297	-0.00124
3.54803	-0.00024		3.54848	-0.0002		3.55243	-0.00046		3.14116	0.001909
3.55622	-0.00012		3.55667	-0.00018		3.56062	-0.0004		3.14935	0.002381
3.56441	-5.8e-05		3.56486	-6.1e-05		3.56881	-0.00038		3.15754	0.002041
3.5726	-3e-05		3.57305	-6.3e-06		3.577	-0.00037		3.16573	0.001701
3.58079	-3.5e-05		3.58124	-3.7e-06		3.58519	-0.00037		3.17392	-0.0016
3.58898	-3.9e-05		3.58943	-1e-05		3.59338	-0.00037		3.18211	-0.00357
3.59717	-5.7e-05		3.59762	-1.7e-05		3.60157	-0.00042		3.1903	-0.00713
3.60536	-0.00059		3.60581	-7.1e-05		3.60976	-0.00045		3.19849	-0.01239
3.61355	-0.00064		3.614	-9.9e-05		3.61795	-0.00041		3.20668	-0.01553
3.62174	-0.00069		3.62219	-0.00013		3.62614	-0.00038		3.21487	-0.01552
3.62993	-0.00076		3.63038	-0.00018		3.63433	-0.0002		3.22306	-0.01132
3.63811	-0.00049		3.63857	-0.00015		3.64252	-9.8e-05		3.23125	-0.00505
3.6463	-0.00039		3.64676	-0.00015		3.65071	-0.00013		3.23944	-0.00198
3.65449	-0.00035		3.65495	-0.00014		3.6589	-0.00017		3.24763	-0.0019
3.66269	-0.00035		3.66314	-0.00014		3.66709	-0.00026		3.25582	-0.00183
3.67088	-0.00036		3.67132	-0.00014		3.67528	-0.00015		3.26401	-0.00118
3.67906	-0.00038		3.67951	-0.00014		3.68347	-0.00015		3.2722	-0.00012
3.68725	-0.00019		3.6877	-0.00015		3.69166	-0.00015		3.28039	-0.00088
3.69544	-0.00016		3.6959	-0.00016		3.69985	-0.00016		3.28858	-0.00164
3.70363	-0.00015		3.70408	-0.00017		3.70804	-0.0002		3.29677	-0.00336
3.71182	-0.00028		3.71227	-0.00023		3.71623	-0.00018		3.30496	-0.00477
3.72001	-0.0004		3.72046	-0.00026		3.72442	-5.2e-05		3.31315	-0.00417
3.7282	5.27e-05		3.72865	-0.00018		3.73261	-5.2e-05		3.32134	-0.00354
3.73639	0.00017		3.73684	-0.00015		3.7408	-6e-05		3.32953	-0.00093
3.74458	0.000288		3.74503	-0.00016		3.74898	-6.8e-05		3.33772	0.002373
3.75277	0.000289		3.75322	-0.00017		3.75718	-0.0001		3.34591	0.001705
3.76096	0.000263		3.76141	-0.00021		3.76537	-0.00032		3.3541	0.001037
3.76915	0.000237		3.7696	-0.00013		3.77355	-0.00025		3.36229	-0.00131
3.77734	0.000185		3.77779	-0.00013		3.78174	-0.00021		3.37047	-0.00773
3.78553	0.000178		3.78598	-5.8e-05		3.78993	-0.0002		3.37866	-0.00588
3.79372	0.000171		3.79417	-1.4e-05		3.79812	-0.00027		3.38686	0.003609
3.80191	0.000142		3.80236	-4.7e-06		3.80631	-0.00034		3.39505	0.00738
3.8101	3.27e-05		3.81055	-9.5e-07		3.8145	-0.00033		3.40324	0.006438
3.81829	-8.7e-06		3.81874	2.8e-06		3.82269	-0.00026		3.41142	0.005496
3.82648	7.53e-05		3.82693	4.04e-05		3.83088	-0.00024		3.41961	0.003263
3.83467	9.49e-05		3.83512	4.51e-05		3.83907	-0.00024		3.4278	-0.00447
3.84286	0.000253		3.84331	4.32e-05		3.84726	-0.00024		3.43599	-0.00678
3.85105	0.000411		3.8515	4.13e-05		3.85545	-0.00024		3.44418	-0.00217
3.85924	0.000481		3.85969	1.7e-05		3.86364	-0.00024		3.45237	-0.00205
3.86743	0.000566		3.86788	-3.9e-05		3.87183	-0.00024		3.46056	-0.00209
3.87562	0.000792		3.87607	3.7e-05		3.88002	-0.00026		3.46875	-0.00213
3.88381	0.000672		3.88426	3.34e-05		3.88821	-0.0003		3.47694	-0.00291
3.892	0.000552		3.89245	2.98e-05		3.8964	-0.00046		3.48513	-0.00401
3.90019	0.000247		3.90064	2.04e-05		3.90459	-0.00039		3.49332	-0.00283
3.90838	-0.00038		3.90883	1.49e-06		3.91278	-0.00035		3.50151	0.00615
3.91657	-0.00039		3.91702	8.11e-05		3.92097	-8.2e-05		3.5097	0.016346
3.92476	-0.00043		3.92521	9.97e-05		3.92916	0.000221		3.51789	0.020038
3.93295	-0.00048		3.9334	9.94e-05		3.93735	0.000347		3.52608	0.009867
3.94114	-0.0006		3.94159	9.91e-05		3.94554	0.000265		3.53427	-0.0003
3.94933	-0.00055		3.94978	9.85e-05		3.95373	0.000184		3.54246	-0.00716
3.95752	-0.00053		3.95797	-6.4e-05		3.96192	-0.00031		3.55065	-0.00638
3.96571	-0.00051		3.96616	-0.00011		3.97011	-0.00032		3.55884	0.007259
3.9739	-0.00048		3.97435	-3.8e-05		3.9783	-0.00032		3.56703	0.019453
3.98209	-0.00047		3.98254	-7e-07		3.98649	-0.00033		3.57522	0.022683
3.99028	-0.00046		3.99073	1.78e-05		3.99468	-0.00042		3.58341	0.013824
3.99847	-0.0004		3.99892	2.06e-05		4.00287	-0.00041		3.5916	0.004965
4.00666	-0.00039		4.00711	2.34e-05		4.01106	-0.0004		3.59979	0.000805
4.01485	-0.00039		4.0153	4.33e-05		4.01925	-0.0004		3.60798	0.000544
4.02304	-1.2e-05		4.02349	4.39e-05		4.02744	-0.0004		3.61617	0.000284
4.03123	5.46e-05		4.03168	5.2e-05		4.03563	-0.00041		3.62436	5.75e-05
4.03941	4.68e-05		4.03987	5.05e-05		4.04382	-0.00038		3.63255	0.003668
4.0476	3.9e-05		4.04805	4.91e-05		4.05201	-0.00028		3.64074	0.002632
4.05579	1.64e-05		4.05624	2.45e-05		4.0602	-0.00019		3.64893	0.001596
4.06398	-0.00013		4.06443	-8.2e-05		4.06839	-0.00018		3.65712	-0.00081
4.07217	-0.00042		4.07263	-6.7e-05		4.07658	-0.00017		3.66531	-0.00192
4.08036	-0.0005		4.08082	-6.1e-05		4.08477	0.00035		3.6735	-0.00172
4.08855	-0.00051		4.089	-6.1e-05		4.09296	0.000359		3.68169	-0.00162
4.09674	-0.00051		4.09719	-6.1e-05		4.10115	0.000357		3.68988	-0.00169
4.10493	-0.0005		4.10538	-5e-05		4.10934	0.000354		3.69807	-0.00175
4.11312	-0.00049		4.11357	-5e-05		4.11753	0.000311		3.70626	-0.00171
4.12131	-0.00041		4.12176	-5e-05		4.12572	-1.6e-05		3.71445	-0.00178
4.1295	-0.00014		4.12995	-3.8e-05		4.13391	-0.0003		3.72264	-0.00186
4.13769	-2.7e-05		4.13814	-3.8e-05		4.1421	-0.00049		3.73083	-0.00085
4.14588	2.8e-05		4.14633	-3.8e-05		4.15029	-0.00043		3.73902	0.002571
4.15407	4.27e-05		4.15452	-3.9e-05		4.15848	-0.00027		3.74721	0.002375
4.16226	2.13e-05		4.16271	-9.5e-05		4.16666	-0.00025		3.7554	0.002178
4.17045	-5.4e-10		4.1709	-3e-06		4.17485	-3.8e-05		3.76358	0.001305
4.17864	-0.00025		4.17909	7.07e-05		4.18304	0.000215		3.77177	-0.00072
4.18683	-0.00028		4.18728	0.000107		4.19123	0.000224		3.77996	-0.00259
4.19502	-0.00032		4.19547	0.000123		4.19942	0.000222		3.78815	-0.00541
4.20321	-0.0004		4.20366	9.92e-05		4.20761	0.000221		3.79634	-0.00794
4.2114	-0.00047		4.21185	7.49e-05		4.2158	0.000216		3.80453	-0.00508
4.21959	-0.00038		4.22004	-2.4e-05		4.22399	0.000146		3.81272	-0.00266
4.22778	-0.00033		4.22823	1.55e-05		4.23218	7.54e-05		3.82091	-0.00207
4.23597	-0.00035		4.23642	5.11e-05		4.24037	5.65e-05		3.8291	-0.00336
4.24416	-0.00037		4.24461	5.29e-05		4.24856	3.75e-05		3.83729	-0.00466
4.25235	-0.00042		4.2528	5.32e-05		4.25675	-1.8e-05		3.84548	-0.00121
4.26054	-0.00048		4.26099	5.27e-05		4.26494	-0.00013		3.85367	0.003681
4.26873	-0.0002		4.26918	5.22e-05		4.27313	-0.00028		3.86186	0.00521
4.27692	-0.00013		4.27737	5.1e-05		4.28132	-0.00034		3.87005	0.001228
4.28511	-6.5e-05		4.28556	8.43e-06		4.28951	-0.00035		3.87824	-0.00275
4.2933	0.000138		4.29375	7.54e-06		4.2977	-0.00029		3.88643	-0.00276
4.30149	0.000229		4.30194	6.65e-06		4.30589	-0.00027		3.89462	-0.0035
4.30968	0.000222		4.31013	2.07e-06		4.31408	-0.00026		3.90281	-0.00423
4.31787	0.000215		4.31832	-9.9e-06		4.32227	-0.00025		3.911	-0.00551
4.32606	-2.3e-05		4.32651	-3.5e-05		4.33046	-0.00025		3.91919	-0.00478
4.33425	-0.00012		4.3347	-3.9e-05		4.33865	-0.00025		3.92738	-0.00452
4.34244	-0.00021		4.34289	-4.3e-05		4.34684	-0.00026		3.93557	-0.00425
4.35063	-0.00046		4.35108	-5.3e-05		4.35503	-0.00028		3.94376	-0.00376
4.35882	-0.00064		4.35927	-7.4e-05		4.36322	-0.00035		3.95195	-0.00361
4.36701	-0.00065		4.36746	-7e-05		4.37141	-0.00043		3.96014	-0.00345
4.3752	-0.00059		4.37565	-7.1e-05		4.3796	-0.00038		3.96833	-0.00239
4.38339	-0.0005		4.38384	-7.1e-05		4.38779	-0.0001		3.97652	-0.00206
4.39158	-0.00048		4.39203	-8e-05		4.39598	-0.00011		3.98471	-0.00201
4.39977	-0.00047		4.40022	5.08e-05		4.40417	-0.00012		3.9929	-0.00195
4.40796	-0.00029		4.40841	6.85e-05		4.41236	-0.00014		4.00109	-0.00224
4.41615	-0.00025		4.4166	5.2e-05		4.42055	-0.00021		4.00928	-0.00253
4.42434	-0.0002		4.42479	3.56e-05		4.42874	-0.00026		4.01747	-0.00421
4.43253	-0.00016		4.43297	-5.9e-06		4.43693	-0.00032		4.02566	-0.00827
4.44071	-0.00015		4.44116	5.53e-05		4.44512	-0.00044		4.03385	-0.00644
4.4489	-0.00021		4.44935	8.24e-05		4.45331	-0.00039		4.04204	0.000597
4.45709	-0.00027		4.45754	9.21e-05		4.4615	-0.00035		4.05023	-0.0008
4.46528	-0.00053		4.46573	8.84e-05		4.46969	-0.00031		4.05842	-0.0022
4.47347	-0.00046		4.47392	8.48e-05		4.47788	-0.00031		4.06661	-0.00578
4.48166	-0.00037		4.48211	7.65e-05		4.48607	-0.00032		4.0748	-0.01045
4.48985	-0.00037		4.4903	-3.2e-05		4.49426	-0.00033		4.08299	-0.01028
4.49804	-0.00037		4.49849	-0.00015		4.50245	-0.00035		4.09118	-0.0075
4.50623	-0.00035		4.50668	-0.00013		4.51063	-0.00052		4.09937	-0.00284
4.51442	-0.00036		4.51487	-0.00012		4.51882	-0.00055		4.10756	0.00249
4.52261	-0.00037		4.52306	-0.00012		4.52701	-0.00043		4.11575	0.002797
4.5308	-0.00039		4.53125	-0.0001		4.53521	-0.00028		4.12394	0.00254
4.53899	-0.0004		4.53944	-5.1e-05		4.54339	-0.00024		4.13213	0.002283
4.54718	-0.00038		4.54763	-4.9e-05		4.55158	-0.00018		4.14032	0.00108
4.55537	-0.00037		4.55582	-4.7e-05		4.55977	-0.00015		4.14851	0.001014
4.56356	-0.00038		4.56401	-4.2e-05		4.56796	-0.00015		4.1567	-0.00023
4.57175	-0.00038		4.5722	-3.6e-05		4.57615	-0.00015		4.16488	-0.00096
4.57994	-0.00047		4.58039	-1.8e-06		4.58434	-0.00015		4.17307	-0.00126
4.58813	-0.00042		4.58858	3.4e-05		4.59253	-0.00015		4.18126	-0.00156
4.59632	-0.00041		4.59677	4.63e-05		4.60072	-0.00017		4.18945	-0.00452
4.60451	-0.0004		4.60496	5.86e-05		4.60891	-0.0002		4.19764	-0.00563
4.6127	-0.00044		4.61315	7.47e-05		4.6171	-0.00033		4.20583	-0.00608
4.62089	-0.00047		4.62134	8.02e-05		4.62529	-0.00038		4.21402	-0.00654
4.62908	-0.00062		4.62953	7.24e-05		4.63348	-0.00019		4.22221	-0.00658
4.63727	-0.00042		4.63772	6.46e-05		4.64167	-0.00019		4.2304	-0.00483
4.64546	-0.00038		4.64591	1.8e-05		4.64986	-0.0002		4.23859	-0.00354
4.65365	-0.00037		4.6541	-6.2e-05		4.65805	-0.00021		4.24678	-0.00324
4.66184	-0.00036		4.66229	-0.00016		4.66624	-0.00042		4.25497	-0.00237
4.67003	-0.00034		4.67048	-2.1e-05		4.67443	-0.00059		4.26316	-0.0016
4.67822	-0.00034		4.67867	-2.6e-05		4.68262	-0.00048		4.27135	-0.00083
4.68641	-0.00034		4.68686	-3.1e-05		4.69081	-0.00046		4.27954	0.000418
4.6946	-0.00034		4.69505	-5.2e-05		4.699	-0.00046		4.28773	0.000126
4.70279	-0.00034		4.70324	-9.9e-05		4.70719	-0.00047		4.29592	-0.00017
4.71098	-0.00047		4.71143	-3.8e-05		4.71538	-0.00047		4.30411	-0.00179
4.71917	-0.00057		4.71962	-1.4e-05		4.72357	-0.0005		4.3123	-0.00194
4.72736	-0.00062		4.72781	9.02e-06		4.73176	-0.00039		4.32049	0.001344
4.73555	-0.00058		4.736	0.000166		4.73995	-0.00025		4.32868	0.005556
4.74374	-0.00058		4.74419	0.000165		4.74814	-0.00026		4.33687	0.006923
4.75193	-0.00057		4.75238	0.000165		4.75633	-0.00026		4.34506	0.007049
4.76012	-0.00057		4.76057	0.000163		4.76452	-0.00028		4.35325	0.006167
4.76831	-0.00055		4.76876	0.000159		4.77271	-0.00036		4.36144	0.005286
4.7765	-0.00055		4.77695	0.000113		4.7809	-0.0003		4.36963	0.005645
4.78468	-0.00055		4.78514	1.33e-05		4.78909	-0.00018		4.37782	0.005514
4.79288	-0.00055		4.79333	-1.8e-05		4.79728	-0.00012		4.38601	0.005382
4.80107	-0.00051		4.80152	-1.2e-05		4.80547	-0.00019		4.3942	0.004703
4.80926	-0.00051		4.80971	-6.7e-06		4.81366	-0.00025		4.40239	-0.00101
4.81744	-0.00051		4.8179	1.31e-05		4.82185	-0.00041		4.41058	-0.00371
4.82563	-0.00051		4.82608	2.21e-05		4.83004	-0.00046		4.41877	-0.00032
4.83382	-0.0005		4.83427	2.34e-05		4.83823	-0.00051		4.42696	0.00461
4.84201	-0.0005		4.84246	2.39e-05		4.84642	-0.00049		4.43515	0.005972
4.8502	-0.00051		4.85065	2.04e-05		4.85461	-0.00032		4.44334	0.006102
4.85839	-0.00055		4.85884	1.69e-05		4.8628	-0.00031		4.45153	0.005982
4.86658	-0.00049		4.86703	-3.2e-05		4.87099	-0.00031		4.45972	0.005863
4.87477	-0.00044		4.87522	-2.9e-05		4.87918	-0.00031		4.46791	0.004584
4.88296	-0.00038		4.88341	-3e-05		4.88736	-0.00032		4.4761	0.003305
4.89115	-0.00036		4.8916	-3e-05		4.89555	-0.00034		4.48429	-0.00018
4.89934	-0.00034		4.89979	-4e-05		4.90374	-0.0004		4.49248	-0.0089
4.90753	-0.00035		4.90798	-2.1e-05		4.91193	-0.00046		4.50067	-0.00978
4.91572	-0.00035		4.91617	8.66e-07		4.92012	-0.00046		4.50885	-0.00803
4.92391	-0.00049		4.92436	5.54e-06		4.92831	-0.00046		4.51705	-0.00756
4.9321	-0.00048		4.93255	7.67e-06		4.9365	-0.00047		4.52524	-0.00738
4.94029	-0.00048		4.94074	-5.3e-06		4.94469	-0.00049		4.53343	-0.0072
4.94848	-0.00048		4.94893	-1.8e-05		4.95288	-0.00052		4.54162	-0.00298
4.95667	-0.00049		4.95712	-2.2e-05		4.96107	-0.00044		4.5498	0.003848
4.96486	-0.00049		4.96531	-2.5e-05		4.96926	-0.00033		4.55799	0.006193
4.97305	-0.0005		4.9735	-7.4e-05		4.97745	-0.00033		4.56618	0.00646
4.98124	-0.00054		4.98169	-0.00012		4.98564	-0.00034		4.57437	0.006501
4.98943	-0.00051		4.98988	-3.1e-05		4.99383	-0.00034		4.58256	0.00643
4.99762	-0.0005		4.99807	-2.2e-05		5.00202	-0.0004		4.59075	0.006359
5.00581	-0.00049		5.00626	-1.3e-05		5.01021	-0.00039		4.59894	0.000935
5.014	-0.00047		5.01445	2.44e-06		5.0184	-0.00037		4.60713	-0.00463
5.02219	-0.00048		5.02264	4.98e-05		5.02659	-0.00035		4.61532	-0.00458
5.03038	-0.00048		5.03083	5.87e-05		5.03478	-0.00034		4.62351	0.00054
5.03857	-0.0005		5.03902	6.76e-05		5.04297	-0.00033		4.6317	0.00095
5.04676	-0.00054		5.04721	7.38e-05		5.05116	-0.00033		4.63989	0.000859
5.05495	-0.00047		5.0554	7.79e-05		5.05935	-0.00031		4.64808	0.000769
5.06314	-0.00047		5.06359	0.000126		5.06754	-0.0003		4.65627	-0.00181
5.07133	-0.00046		5.07178	0.000103		5.07573	-0.00031		4.66446	-0.00478
5.07952	-0.00047		5.07997	8.11e-05		5.08392	-0.00033		4.67265	-0.00522
5.08771	-0.00047		5.08816	2.8e-05		5.09211	-0.0004		4.68084	-0.0044
5.0959	-0.00049		5.09635	-7.9e-05		5.1003	-0.00041		4.68903	-0.00438
5.10409	-0.00051		5.10454	-7.9e-05		5.10849	-0.00031		4.69722	-0.00435
5.11228	-0.00056		5.11273	-7.9e-05		5.11668	-0.0003		4.70541	-0.0006
5.12047	-0.00046		5.12092	-8e-05		5.12487	-0.00029		4.7136	0.006487
5.12866	-0.00042		5.12911	-0.00016		5.13306	-0.00033		4.72179	0.006951
5.13685	-0.00038		5.1373	-2.8e-05		5.14125	-0.00036		4.72998	0.007058
5.14504	-0.00031		5.14549	-1.9e-05		5.14944	-0.00045		4.73817	0.006569
5.15323	-0.00028		5.15368	-1.5e-05		5.15763	-0.00044		4.74636	0.00608
5.16141	-0.00029		5.16187	-1.6e-05		5.16582	-0.00044		4.75455	0.003557
5.1696	-0.00029		5.17006	-1.7e-05		5.17401	-0.00044		4.76274	0.000505
5.17779	-0.0003		5.17825	-2.1e-05		5.1822	-0.00046		4.77093	0.000409
5.18598	-0.00023		5.18644	-3.7e-05		5.19039	-0.00047		4.77912	0.002623
5.19418	-0.00023		5.19463	-2.3e-05		5.19858	-0.00047		4.78731	0.005003
5.20236	-0.00023		5.20282	-1.7e-05		5.20677	-0.00048		4.7955	0.005073
5.21055	-0.00024		5.21101	-1.1e-05		5.21496	-0.00043		4.80369	0.005043
5.21874	-0.00045		5.2192	-1.1e-05		5.22315	-0.00042		4.81188	0.005013
5.22693	-0.00056		5.22738	-1.2e-05		5.23134	-0.00042		4.82007	0.003331
5.23512	-0.00046		5.23557	-1.3e-05		5.23953	-0.00042		4.82826	0.002674
5.24331	-0.00035		5.24376	-3.5e-05		5.24772	-0.00023		4.83645	0.006367
5.2515	-0.00023		5.25195	-0.00012		5.25591	-5.2e-05		4.84464	0.007063
5.25969	-0.0002		5.26014	-6.4e-05		5.2641	-4.5e-05		4.85283	0.007225
5.26788	-0.00023		5.26833	-6.7e-05		5.27229	-7.6e-05		4.86102	0.00633
5.27607	-0.00026		5.27652	-7e-05		5.28048	-0.00011		4.86921	0.005435
5.28426	-0.00033		5.28471	-8.6e-05		5.28866	-0.00025		4.8774	0.005054
5.29245	-0.00047		5.2929	-0.00012		5.29685	-0.00026		4.88559	0.006177
5.30064	-0.00054		5.30109	-0.00021		5.30504	-0.00013		4.89377	0.006477
5.30883	-0.0006		5.30928	-0.0002		5.31323	-0.00011		4.90196	0.004959
5.31702	-0.00064		5.31747	-0.00016		5.32142	-0.00013		4.91015	0.003441
5.32521	-0.00054		5.32566	-0.00013		5.32961	-0.00016		4.91835	0.003252
5.3334	-0.00052		5.33385	-0.00013		5.3378	-0.00022		4.92653	0.005924
5.34159	-0.00052		5.34204	-0.00014		5.34599	-0.00022		4.93472	0.008188
5.34978	-0.00051		5.35023	-0.00014		5.35418	-0.00022		4.94291	0.009585
5.35797	-0.00051		5.35842	-0.00025		5.36237	-0.0004		4.9511	0.010928
5.36616	-0.00051		5.36661	-0.00017		5.37056	-0.00034		4.95929	0.011535
5.37435	-0.00052		5.3748	-0.00014		5.37875	-0.00034		4.96748	0.009882
5.38254	-0.00071		5.38299	-0.00013		5.38694	-0.00035		4.97567	0.008229
5.39073	-0.00054		5.39118	-0.00013		5.39513	-0.00035		4.98386	0.005441
5.39892	-0.00052		5.39937	-0.00013		5.40332	-0.00037		4.99205	0.005634
5.40711	-0.00051		5.40756	-6e-05		5.41151	-0.00041		5.00024	0.009368
5.4153	-0.00051		5.41575	-3.7e-05		5.4197	-0.00044		5.00843	0.011079
5.42349	-0.0005		5.42394	-3.6e-05		5.42789	-0.00033		5.01662	0.010451
5.43168	-0.00048		5.43213	-3.6e-05		5.43608	-0.00015		5.02481	0.009824
5.43987	-0.00049		5.44032	-4.2e-05		5.44427	-6.1e-05		5.033	0.006434
5.44806	-0.0005		5.44851	-4.7e-05		5.45246	-9.8e-05		5.04119	0.010699
5.45625	-0.00052		5.4567	-9.8e-05		5.46065	-0.00014		5.04938	0.011077
5.46444	-0.00043		5.46489	-8.3e-05		5.46884	-0.00033		5.05757	0.010264
5.47263	-0.00043		5.47308	-7.9e-05		5.47703	-0.00037		5.06576	0.009451
5.48082	-0.00044		5.48127	-7.6e-05		5.48522	-0.00031		5.07395	0.004376
5.48901	-0.00044		5.48946	-3.3e-05		5.49341	-0.00021		5.08214	0.003889
5.4972	-0.00044		5.49765	9.71e-06		5.5016	-0.00021		5.09033	0.003966
5.50539	-0.00055		5.50584	8.91e-05		5.50979	-0.00022		5.09852	0.004534
5.51358	-0.00056		5.51403	8.12e-05		5.51798	-0.00022		5.10671	0.009427
5.52177	-0.00059		5.52222	7.34e-05		5.52617	0.000114		5.1149	0.011291
5.52996	-0.00045		5.53041	5.35e-05		5.53436	0.000274		5.12309	0.011657
5.53815	-0.00044		5.5386	1.33e-05		5.54255	0.000306		5.13128	0.01018
5.54634	-0.00044		5.54679	1.22e-05		5.55074	0.000319		5.13947	0.008703
5.55452	-0.0003		5.55498	-2.5e-05		5.55893	0.000287		5.14766	0.007213
5.56271	-0.00015		5.56317	-5.9e-05		5.56712	0.000255		5.15585	0.009795
5.5709	-6.2e-05		5.57136	-7.1e-05		5.57531	2.52e-05		5.16404	0.011452
5.57909	-5.3e-05		5.57955	-8.2e-05		5.5835	-0.0002		5.17223	0.011899
5.58728	-0.00014		5.58774	-7.8e-05		5.59169	-0.00022		5.18042	0.011846
5.59547	-0.00022		5.59593	-7.8e-05		5.59988	-0.00025		5.18861	0.011793
5.60366	-0.00059		5.60412	-7.9e-05		5.60807	-0.00034		5.1968	0.012119
5.61185	-0.00083		5.6123	-0.00012		5.61626	-0.00034		5.20499	0.013024
5.62004	-0.00081		5.62049	-5.9e-05		5.62445	-0.00034		5.21318	0.015875
5.62823	-0.00077		5.62868	-3.6e-05		5.63264	-0.00035		5.22137	0.01569
5.63642	-0.00074		5.63687	-2.5e-05		5.64083	-0.00036		5.22956	0.015506
5.64461	-0.00062		5.64506	-2.1e-05		5.64902	-0.00038		5.23775	0.014434
5.6528	-0.00061		5.65325	-1.6e-05		5.65721	-0.00035		5.24594	0.012173
5.66099	-0.00061		5.66144	2.9e-05		5.6654	-0.00034		5.25413	0.011483
5.66918	-0.00061		5.66963	4.32e-05		5.67359	-0.00036		5.26232	0.012954
5.67737	-0.00065		5.67782	4.35e-05		5.68177	-0.00038		5.2705	0.01188
5.68556	-0.00074		5.68601	4.32e-05		5.68996	-0.00046		5.27869	0.010806
5.69375	-0.00082		5.6942	4.29e-05		5.69815	-0.00043		5.28688	0.008491
5.70194	-0.00064		5.70239	-4.8e-05		5.70634	-0.00042		5.29507	0.00962
5.71013	-0.0006		5.71058	-6e-05		5.71453	-0.00041		5.30326	0.011773
5.71832	-0.00061		5.71877	-7.2e-05		5.72272	-0.0004		5.31145	0.011165
5.72651	-0.00061		5.72696	-9.6e-05		5.73091	-0.0004		5.31964	0.010557
5.7347	-0.00063		5.73515	-7.9e-05		5.7391	-0.0004		5.32783	0.005977
5.74289	-0.00075		5.74334	-7.1e-05		5.74729	-0.00029		5.33602	0.005121
5.75108	-0.0005		5.75153	-6.8e-05		5.75548	-0.00024		5.34421	0.007625
5.75927	-0.00047		5.75972	-6.4e-05		5.76367	-0.00023		5.3524	0.011682
5.76746	-0.00047		5.76791	-4.3e-05		5.77186	-0.00022		5.36059	0.016844
5.77565	-0.00047		5.7761	-3.6e-05		5.78005	-0.00026		5.36878	0.017418
5.78384	-0.00047		5.78429	-2.9e-05		5.78824	-0.0003		5.37697	0.017638
5.79203	-0.00068		5.79248	1.85e-05		5.79643	-0.00028		5.38516	0.017556
5.80022	-0.0007		5.80067	3.16e-05		5.80462	-0.00027		5.39335	0.017475
5.80841	-0.00066		5.80886	4.47e-05		5.81281	-0.00028		5.40154	0.017093
5.8166	-0.00048		5.81705	4.33e-05		5.821	-0.00029		5.40973	0.015037
5.82479	-0.00047		5.82524	4.2e-05		5.82919	-0.00031		5.41792	0.015057
5.83298	-0.00046		5.83343	2.74e-05		5.83738	-0.00033		5.42611	0.015367
5.84117	-0.00047		5.84162	-5.9e-05		5.84557	-0.00041		5.4343	0.015412
5.84936	-0.00048		5.84981	-0.00021		5.85376	-0.00056		5.44249	0.016834
5.85755	-0.00058		5.858	-0.00024		5.86195	-0.00033		5.45068	0.017274
5.86574	-0.0007		5.86619	-0.00023		5.87014	-0.00033		5.45887	0.017172
5.87393	-0.00063		5.87438	-0.00019		5.87833	-0.00033		5.46706	0.01707
5.88212	-0.00062		5.88257	-0.00016		5.88652	-0.00034		5.47525	0.015894
5.89031	-0.00063		5.89076	-0.00014		5.89471	-0.00039		5.48344	0.014719
5.8985	-0.00063		5.89895	-0.00013		5.9029	-0.0005		5.49163	0.011129
5.90669	-0.00064		5.90714	-0.00013		5.91109	-0.00044		5.49982	0.009341
5.91488	-0.00041		5.91533	-0.00014		5.91928	-0.00031		5.50801	0.009242
5.92307	-0.00039		5.92352	-0.00014		5.92747	-0.00025		5.5162	0.009602
5.93126	-0.00038		5.93171	-0.00016		5.93566	-0.00022		5.52439	0.009963
5.93945	-0.00042		5.9399	-0.00014		5.94385	-0.00026		5.53258	0.010586
5.94764	-0.00045		5.94809	-0.00014		5.95204	-0.0003		5.54077	0.010689
5.95582	-0.00052		5.95627	-0.00014		5.96023	-0.00024		5.54896	0.010451
5.96401	-0.00036		5.96446	-0.00014		5.96842	-0.00024		5.55715	0.010213
5.9722	-0.00029		5.97265	-9.6e-05		5.97661	-0.00024		5.56534	0.009426
5.98039	-0.00029		5.98085	-9.6e-05		5.9848	-0.00024		5.57353	0.009403
5.98858	-0.00029		5.98904	-0.0001		5.99299	0.000361		5.58172	0.008995
5.99677	-0.00038		5.99722	-0.00011		6.00118	0.0007		5.58991	0.009055
6.00496	-0.00047		6.00541	-0.0002		6.00937	0.000736		5.5981	0.008796
6.01315	-0.0005		6.0136	-0.00027		6.01756	0.000705		5.60629	0.008537
6.02134	-0.00071		6.02179	-0.00019		6.02574	0.000675		5.61448	0.00847
6.02953	-0.00071		6.02998	-0.0001		6.03393	0.000433		5.62267	0.011175
6.03772	-0.00063		6.03817	-9.4e-05		6.04213	9.73e-05		5.63086	0.010767
6.04591	-0.00062		6.04636	-9.4e-05		6.05032	-2.1e-06		5.63905	0.010358
6.0541	-0.00062		6.05455	-0.0001		6.0585	0.000131		5.64724	0.009495
6.06229	-0.00062		6.06274	-0.00012		6.06669	0.00016		5.65543	0.014072
6.07048	-0.00063		6.07093	-0.00016		6.07488	0.000189		5.66362	0.013343
6.07867	-0.00079		6.07912	-0.00019		6.08307	0.000235		5.6718	0.012613
6.08686	-0.00091		6.08731	-0.00018		6.09126	0.000242		5.67999	0.010844
6.09505	-0.00091		6.0955	-0.00017		6.09945	0.000178		5.68818	0.01233
6.10324	-0.0007		6.10369	-0.00017		6.10764	0.000114		5.69637	0.012177
6.11143	-0.00053		6.11188	-0.00017		6.11583	-0.0002		5.70456	0.012024
6.11962	-0.00044		6.12007	-0.00017		6.12402	-0.00027		5.71275	0.011647
6.12781	-0.0004		6.12826	-0.00017		6.13221	-0.00028		5.72094	0.011701
6.136	-0.00041		6.13645	-0.00018		6.1404	-0.00029		5.72913	0.011665
6.14419	-0.00042		6.14464	-0.00019		6.14859	-0.00033		5.73732	0.011629
6.15238	-0.00045		6.15283	-0.00022		6.15678	-0.00044		5.74551	0.013252
6.16057	-0.00049		6.16102	-0.0002		6.16497	-0.00045		5.7537	0.014162
6.16876	-0.0005		6.16921	-0.00013		6.17316	-0.0004		5.76189	0.014184
6.17695	-0.00051		6.1774	-0.00013		6.18135	-0.0004		5.77008	0.012199
6.18514	-0.0006		6.18559	-0.00012		6.18954	-0.00034		5.77827	0.010213
6.19333	-0.00056		6.19378	-0.00012		6.19773	-0.00022		5.78646	0.008014
6.20152	-0.00056		6.20197	-0.00012		6.20592	-0.00015		5.79465	0.010302
6.20971	-0.00056		6.21016	-0.00012		6.21411	-0.00011		5.80284	0.010749
6.2179	-0.00051		6.21835	-0.00013		6.2223	-0.00012		5.81103	0.01077
6.22609	-0.00049		6.22654	-0.00013		6.23049	-0.00013		5.81922	0.00969
6.23428	-0.00048		6.23473	-0.00023		6.23868	-0.00043		5.82741	0.00861
6.24247	-0.00048		6.24292	-0.00022		6.24687	-0.00034		5.8356	0.00854
6.25066	-0.00051		6.25111	-0.00019		6.25506	-0.00025		5.84379	0.008471
6.25885	-0.00055		6.2593	-0.00018		6.26325	-0.00023		5.85198	0.008018
6.26704	-0.00051		6.26749	-0.00019		6.27144	-0.00027		5.86017	0.007213
6.27523	-0.0005		6.27568	-0.0002		6.27963	-0.00032		5.86836	0.008161
6.28342	-0.00051		6.28387	-0.00023		6.28782	-0.0004		5.87655	0.009534
6.29161	-0.00052		6.29206	-0.0002		6.29601	-0.0004		5.88474	0.010266
6.29979	-0.00056		6.30025	-0.00016		6.3042	-0.00041		5.89293	0.011296
6.30799	-0.00055		6.30844	-0.00015		6.31239	-0.00042		5.90112	0.011982
6.31618	-0.00057		6.31663	-0.00015		6.32058	-0.00022		5.90931	0.012045
6.32437	-0.00058		6.32482	-0.00015		6.32877	-0.00017		5.9175	0.012018
6.33256	-0.00064		6.33301	-0.00015		6.33696	-0.00017		5.92569	0.011992
6.34074	-0.00037		6.34119	-0.00018		6.34515	-0.00018		5.93388	0.010742
6.34893	-0.00035		6.34938	-0.00025		6.35334	-0.00034		5.94207	0.011255
6.35712	-0.00036		6.35757	-0.00022		6.36153	-0.00023		5.95026	0.01054
6.36531	-0.00037		6.36576	-0.00021		6.36972	-0.00017		5.95845	0.009826
6.3735	-0.00039		6.37395	-0.00019		6.37791	-0.00015		5.96664	0.007986
6.38169	-0.00056		6.38214	-0.00019		6.3861	-0.00014		5.97483	0.009074
6.38988	-0.00057		6.39033	-0.00019		6.39429	-0.00017		5.98302	0.010885
6.39807	-0.00058		6.39852	-0.00021		6.40247	-0.0002		5.99121	0.011481
6.40626	-0.00064		6.40671	-0.00023		6.41066	-0.0004		5.9994	0.010892
6.41445	-0.00062		6.4149	-0.00019		6.41885	-0.00046		6.00759	0.010303
6.42264	-0.00061		6.42309	-0.00019		6.42704	-0.00036		6.01578	0.006162
6.43083	-0.00061		6.43128	-0.00019		6.43523	-0.00022		6.02397	0.001442
6.43902	-0.00062		6.43947	-0.00019		6.44342	-0.00015		6.03216	0.001741
6.44721	-0.00066		6.44766	-0.0002		6.45161	-0.00012		6.04035	0.002555
6.4554	-0.0007		6.45585	-0.00023		6.4598	-0.00012		6.04854	0.00337
6.46359	-0.00071		6.46404	-0.00025		6.46799	-0.00012		6.05673	0.004985
6.47178	-0.00051		6.47223	-0.00022		6.47618	-0.00013		6.06491	0.00566
6.47997	-0.00048		6.48042	-0.00021		6.48437	-0.00032		6.0731	0.005869
6.48816	-0.00048		6.48861	-0.00021		6.49256	-0.00046		6.08129	0.006078
6.49635	-0.00048		6.4968	-0.00021		6.50075	-0.00048		6.08948	0.006597
6.50454	-0.00049		6.50499	-0.00021		6.50894	-0.00045		6.09767	0.008003
6.51273	-0.0005		6.51318	-0.00021		6.51713	-0.00042		6.10586	0.009054
6.52092	-0.00051		6.52137	-0.00022		6.52532	-0.00041		6.11405	0.009304
6.52911	-0.00051		6.52956	-0.00032		6.53351	-0.00042		6.12224	0.009318
6.5373	-0.00052		6.53775	-0.00022		6.5417	-0.00043		6.13043	0.009152
6.54549	-0.00055		6.54594	-0.00017		6.54989	-0.00049		6.13862	0.008987
6.55368	-0.00059		6.55413	-0.00014		6.55808	-0.00045		6.14681	0.008786
6.56187	-0.00069		6.56232	-0.00013		6.56627	-0.00044		6.155	0.008586
6.57006	-0.00073		6.57051	-0.00013		6.57446	-0.00042		6.16319	0.006492
6.57825	-0.00061		6.5787	-0.00013		6.58265	-0.00019		6.17138	0.001387
6.58644	-0.00058		6.58689	-0.00013		6.59084	-9e-05		6.17957	0.004233
6.59463	-0.00057		6.59508	-0.00014		6.59903	-9.3e-05		6.18776	0.011073
6.60282	-0.00056		6.60327	-0.00017		6.60722	-9.7e-05		6.19595	0.011135
6.61101	-0.00057		6.61146	-0.00021		6.61541	-0.00034		6.20414	0.011146
6.6192	-0.00058		6.61965	-0.00023		6.6236	-0.00034		6.21233	0.011158
6.62739	-0.00069		6.62784	-0.00026		6.63179	-0.00035		6.22052	0.011557
6.63558	-0.0007		6.63603	-0.00032		6.63998	-0.00039		6.22871	0.011957
6.64377	-0.00082		6.64422	-0.00016		6.64817	-0.00038		6.2369	0.011494
6.65196	-0.00084		6.65241	-0.00014		6.65636	-0.00038		6.24509	0.011031
6.66015	-0.00062		6.6606	-0.00016		6.66455	-0.00037		6.25328	0.010094
6.66834	-0.00062		6.66879	-0.00017		6.67274	-0.00029		6.26147	0.007817
6.67653	-0.00061		6.67698	-0.0002		6.68093	-0.00023		6.26966	0.006052
6.68471	-0.00061		6.68517	-0.00033		6.68912	-0.00021		6.27785	0.005488
6.6929	-0.00054		6.69336	-0.00037		6.69731	-0.00021		6.28604	0.004382
6.70109	-0.00053		6.70155	-0.00033		6.7055	-0.00024		6.29423	0.004166
6.70929	-0.00053		6.70974	-0.00032		6.71369	-0.00026		6.30242	0.005719
6.71747	-0.00053		6.71793	-0.00031		6.72188	-0.00027		6.31061	0.006694
6.72566	-0.00071		6.72612	-0.00031		6.73007	-0.00028		6.3188	0.008438
6.73385	-0.00074		6.7343	-0.00027		6.73826	-0.00033		6.32699	0.01002
6.74204	-0.00067		6.74249	-0.00024		6.74645	-0.00045		6.33518	0.009381
6.75023	-0.00059		6.75068	-0.00023		6.75464	-0.00046		6.34337	0.008742
6.75842	-0.00056		6.75887	-0.00023		6.76283	-0.00041		6.35156	0.007218
6.76661	-0.00054		6.76706	-0.00023		6.77102	-0.00041		6.35975	0.004293
6.7748	-0.00054		6.77525	-0.00024		6.77921	-0.00041		6.36794	0.003961
6.78299	-0.00055		6.78344	-0.00025		6.7874	-0.00043		6.37613	0.002838
6.79118	-0.00056		6.79163	-0.00021		6.79558	-0.00045		6.38432	0.000756
6.79937	-0.00061		6.79982	-0.0002		6.80377	-0.00044		6.39251	0.000129
6.80756	-0.0006		6.80801	-0.00019		6.81196	-0.00039		6.4007	0.000696
6.81575	-0.00059		6.8162	-0.00018		6.82015	-0.00034		6.40888	0.001096
6.82394	-0.0006		6.82439	-0.00017		6.82834	-0.00029		6.41707	0.002007
6.83213	-0.0006		6.83258	-0.00017		6.83653	-0.00022		6.42526	0.00242
6.84032	-0.00061		6.84077	-0.00019		6.84472	-0.00021		6.43346	0.001617
6.84851	-0.00065		6.84896	-0.00021		6.85291	-0.00021		6.44165	0.000814
6.8567	-0.00063		6.85715	-0.00032		6.8611	-0.00022		6.44983	0.00259
6.86489	-0.00062		6.86534	-0.00032		6.86929	-0.00023		6.45802	0.003807
6.87308	-0.00062		6.87353	-0.00027		6.87748	-0.00039		6.46621	0.00419
6.88127	-0.00061		6.88172	-0.00026		6.88567	-0.00041		6.4744	0.004573
6.88946	-0.00046		6.88991	-0.00025		6.89386	-0.00041		6.48259	0.007505
6.89765	-0.00034		6.8981	-0.00024		6.90205	-0.00042		6.49078	0.007974
6.90584	-0.00031		6.90629	-0.00023		6.91024	-0.00043		6.49897	0.00818
6.91403	-0.00038		6.91448	-0.0002		6.91843	-0.00046		6.50716	0.008218
6.92222	-0.00045		6.92267	-0.0002		6.92662	-0.00047		6.51535	0.007382
6.93041	-0.00061		6.93086	-0.0002		6.93481	-0.00047		6.52354	0.006546
6.9386	-0.00055		6.93905	-0.0002		6.943	-0.00048		6.53173	0.005674
6.94679	-0.00054		6.94724	-0.00021		6.95119	-0.00046		6.53992	0.00824
6.95498	-0.00054		6.95543	-0.00024		6.95938	-0.00044		6.54811	0.009342
6.96317	-0.00061		6.96362	-0.00024		6.96757	-0.00042		6.5563	0.009541
6.97136	-0.00068		6.97181	-0.0002		6.97576	-0.0004		6.56449	0.007907
6.97955	-0.00056		6.98	-0.00019		6.98395	-0.00027		6.57268	0.006273
6.98774	-0.00056		6.98819	-0.00018		6.99214	8.98e-07		6.58087	0.003474
6.99593	-0.00058		6.99638	-0.00019		7.00033	0.000124		6.58906	0.005593
7.00412	-0.00061		7.00457	-0.0002		7.00852	0.00014		6.59725	0.006443
7.01231	-0.00066		7.01276	-0.00025		7.01671	-0.00011		6.60544	0.006726
7.0205	-0.00054		7.02095	-0.00025		7.0249	-0.00035		6.61363	0.007009
7.02869	-0.00037		7.02914	-0.00025		7.03309	-0.00033		6.62182	0.006603
7.03688	-0.00034		7.03733	-0.00025		7.04128	-0.00032		6.63001	0.006197
7.04507	-0.00033		7.04552	-0.00028		7.04947	-0.00028		6.6382	0.004915
7.05326	-0.00032		7.05371	-0.00031		7.05766	-0.00027		6.64639	0.003915
7.06144	-0.00031		7.0619	-0.00027		7.06585	-0.00028		6.65458	0.002871
7.06963	-0.0003		7.07009	-0.00025		7.07404	-0.00028		6.66277	0.001948
7.07782	-0.00031		7.07828	-0.00025		7.08223	-0.00028		6.67096	0.001798
7.08601	-0.00031		7.08647	-0.00026		7.09042	-0.00031		6.67915	0.001334
7.0942	-0.00065		7.09466	-0.00027		7.09861	-0.00044		6.68734	0.002539
7.10239	-0.00049		7.10285	-0.00033		7.1068	-0.00041		6.69553	0.00745
7.11058	-0.00043		7.11104	-0.00018		7.11499	-0.0004		6.70372	0.007835
7.11877	-0.00041		7.11923	-0.00018		7.12318	-0.00039		6.71191	0.007395
7.12696	-0.00044		7.12742	-0.00018		7.13137	-0.00039		6.7201	0.006954
7.13515	-0.00047		7.1356	-0.00018		7.13956	-0.0004		6.72829	0.003042
7.14334	-0.0005		7.14379	-0.00019		7.14775	-0.00041		6.73648	1.6e-06
7.15153	-0.00053		7.15198	-0.00022		7.15594	-0.00043		6.74467	-0.00081
7.15972	-0.00067		7.16017	-0.0002		7.16413	-0.00046		6.75286	-0.00084
7.16791	-0.00067		7.16836	-0.00019		7.17232	-0.00045		6.76105	-0.00086
7.1761	-0.00067		7.17655	-0.00019		7.18051	-0.00045		6.76924	-0.00166
7.18429	-0.00076		7.18474	-0.00024		7.1887	-0.00037		6.77743	-0.00329
7.19248	-0.00078		7.19293	-0.00028		7.19688	-0.00036		6.78561	-0.00476
7.20067	-0.00079		7.20112	-0.00022		7.20507	-0.00035		6.7938	-0.00408
7.20886	-0.00083		7.20931	-0.00021		7.21326	-0.00035		6.80199	-0.00304
7.21705	-0.00091		7.2175	-0.0002		7.22145	-0.00035		6.81018	-0.00094
7.22524	-0.00072		7.22569	-0.0002		7.22964	-0.00036		6.81837	-0.00077
7.23343	-0.00062		7.23388	-0.00024		7.23783	-0.00037		6.82656	-0.00114
7.24162	-0.00064		7.24207	-0.00028		7.24602	-0.00039		6.83475	-0.0015
7.24981	-0.00065		7.25026	-0.00022		7.25421	-0.00044		6.84294	-0.00173
7.258	-0.00072		7.25845	-0.00021		7.2624	-0.00045		6.85113	-0.00196
7.26619	-0.00074		7.26664	-0.00021		7.27059	-0.00047		6.85932	-0.00275
7.27438	-0.0007		7.27483	-0.00021		7.27878	-0.00049		6.86751	-0.00266
7.28257	-0.00069		7.28302	-0.00021		7.28697	-0.00044		6.8757	0.00158
7.29076	-0.00068		7.29121	-0.00022		7.29516	-0.00023		6.88389	0.004876
7.29895	-0.00061		7.2994	-0.00025		7.30335	-0.00022		6.89208	0.004719
7.30714	-0.0006		7.30759	-0.00031		7.31154	-0.00026		6.90027	0.004563
7.31533	-0.0006		7.31578	-0.00032		7.31973	-0.0003		6.90846	0.003653
7.32352	-0.0006		7.32397	-0.00022		7.32792	-0.00049		6.91665	0.002814
7.33171	-0.0006		7.33216	-0.00016		7.33611	-0.00033		6.92484	0.002289
7.3399	-0.00059		7.34035	-0.00015		7.3443	-0.00029		6.93303	0.001763
7.34809	-0.00059		7.34854	-0.00017		7.35249	-0.00026		6.94122	-0.00282
7.35628	-0.00061		7.35673	-0.00018		7.36068	-0.00025		6.94941	-0.00459
7.36447	-0.00062		7.36492	-0.0002		7.36887	-0.00024		6.9576	-0.00483
7.37266	-0.00045		7.37311	-0.00021		7.37706	-0.00023		6.96579	-0.00507
7.38085	0.000116		7.3813	-0.00022		7.38525	1.75e-05		6.97398	-0.00584
7.38904	0.000117		7.38949	-0.00028		7.39344	0.000132		6.98217	-0.00281
7.39723	0.000117		7.39768	-0.00019		7.40163	0.0001		6.99036	-0.00082
7.40542	-4e-06		7.40587	-0.00017		7.40982	6.81e-05		6.99855	0.000179
7.41361	-0.00013		7.41406	-0.00016		7.41801	-0.0004		7.00674	-0.00095
7.4218	-0.00043		7.42225	-0.00016		7.4262	-0.00041		7.01493	-0.00208
7.42999	-0.0004		7.43044	-0.00019		7.43439	-0.00041		7.02312	-0.00467
7.43818	-0.00039		7.43863	-0.00021		7.44258	-0.00042		7.03131	-0.00604
7.44637	-0.00041		7.44682	-0.00031		7.45077	-0.00045		7.0395	-0.00551
7.45456	-0.00043		7.45501	-0.00036		7.45896	-0.00036		7.04769	-0.00263
7.46274	-0.00068		7.4632	-0.00032		7.46715	-0.00034		7.05588	-0.00144
7.47093	-0.00077		7.47139	-0.00024		7.47534	-0.00035		7.06407	-0.0008
7.47912	-0.00061		7.47958	-0.00017		7.48353	-0.00035		7.07226	-0.00073
7.48731	-0.00059		7.48776	-0.00016		7.49172	-0.00038		7.08045	-0.00066
7.4955	-0.00059		7.49596	-0.00015		7.49991	-0.0004		7.08864	-0.00038
7.50369	-0.0006		7.50415	-0.00015		7.5081	-0.00038		7.09683	-0.00081
7.51188	-0.0007		7.51234	-0.00016		7.51629	-0.00037		7.10502	-0.00123
7.52007	-0.00072		7.52053	-0.00017		7.52448	-0.0002		7.11321	-0.00333
7.52826	-0.00074		7.52871	-0.00021		7.53266	-0.0002		7.1214	-0.0049
7.53645	-0.00082		7.5369	-0.00021		7.54085	-0.0002		7.12959	-0.00132
7.54464	-0.00081		7.54509	-0.00021		7.54904	-0.00021		7.13778	0.000727
7.55283	-0.00069		7.55328	-0.00021		7.55724	-0.00037		7.14597	0.001148
7.56102	-0.00069		7.56147	-0.00022		7.56543	-0.00045		7.15416	0.001493
7.56921	-0.00069		7.56966	-0.00024		7.57361	-0.00039		7.16235	0.001454
7.5774	-0.00062		7.57785	-0.00031		7.5818	-0.00039		7.17054	0.001414
7.58559	-0.00061		7.58604	-0.00033		7.58999	-0.00038		7.17873	0.000369
7.59378	-0.00061		7.59423	-0.00033		7.59818	-0.00037		7.18691	0.003234
7.60197	-0.00066		7.60242	-0.00033		7.60637	-0.00035		7.1951	0.006254
7.61016	-0.0007		7.61061	-0.00035		7.61456	-0.00035		7.20329	0.007221
7.61835	-0.00053		7.6188	-0.00027		7.62275	-0.00017		7.21148	0.007275
7.62654	-0.00052		7.62699	-0.00025		7.63094	-1.2e-05		7.21967	0.006126
7.63473	-0.00052		7.63518	-0.00025		7.63913	0.000107		7.22786	0.004977
7.64292	-0.00052		7.64337	-0.00026		7.64732	0.000178		7.23605	0.001936
7.65111	-0.00052		7.65156	-0.00028		7.65551	0.000141		7.24424	-0.00031
7.6593	-0.00073		7.65975	-0.00031		7.6637	0.000103		7.25243	-0.00247
7.66749	-0.00074		7.66794	-0.00023		7.67189	1.56e-05		7.26062	-0.00364
7.67568	-0.00056		7.67613	-0.00023		7.68008	-0.00041		7.26881	-0.00294
7.68387	-0.00047		7.68432	-0.00022		7.68827	-0.00048		7.277	0.000923
7.69206	-0.0005		7.69251	-0.0002		7.69646	-0.0005		7.28519	0.00152
7.70025	-0.00054		7.7007	-0.00019		7.70465	-0.00044		7.29338	0.001281
7.70844	-0.00062		7.70889	-0.00019		7.71284	-0.00036		7.30157	0.001042
7.71663	-0.00066		7.71708	-0.00019		7.72103	-0.00033		7.30976	-0.00273
7.72482	-0.00068		7.72527	-0.0002		7.72922	-0.00034		7.31795	-0.00403
7.73301	-0.00069		7.73346	-0.00023		7.73741	-0.00036		7.32614	0.000738
7.7412	-0.00071		7.74165	-0.00035		7.7456	-0.0004		7.33433	0.003301
7.74939	-0.00076		7.74984	-0.00032		7.75379	-8.3e-05		7.34252	0.003271
7.75758	-0.0007		7.75803	-0.00032		7.76198	-8.5e-06		7.35071	0.003242
7.76577	-0.00069		7.76622	-0.00032		7.77017	-9.3e-06		7.3589	-0.00552
7.77396	-0.0007		7.77441	-0.00033		7.77836	-1e-05		7.36709	-0.00863
7.78215	-0.0007		7.7826	-0.00038		7.78655	-2.3e-05		7.37528	-0.00543
7.79034	-0.00073		7.79079	-0.00025		7.79474	-5.5e-05		7.38347	-0.00486
7.79853	-0.00076		7.79898	-0.00024		7.80293	-8.2e-05		7.39166	-0.0043
7.80672	-0.00082		7.80717	-0.00024		7.81112	-0.00011		7.39985	-0.0032
7.81491	-0.00085		7.81536	-0.00025		7.81931	-0.00035		7.40804	0.002777
7.8231	-0.00078		7.82355	-0.00025		7.8275	-0.00039		7.41623	0.006254
7.83129	-0.00077		7.83174	-0.00028		7.83569	-0.00043		7.42442	0.005704
7.83948	-0.00077		7.83993	-0.00023		7.84388	-0.00035		7.43261	0.005154
7.84767	-0.00077		7.84812	-0.00022		7.85207	8.83e-05		7.4408	0.002883
7.85585	-0.00078		7.85631	-0.00022		7.86026	0.000272		7.44899	-0.00227
7.86404	-0.00073		7.8645	-0.00022		7.86845	0.000116		7.45718	-0.00156
7.87223	-0.00073		7.87268	-0.00022		7.87664	-4e-05		7.46537	-0.00156
7.88042	-0.00073		7.88087	-0.00022		7.88483	-0.00036		7.47356	-0.00329
7.88861	-0.00073		7.88907	-0.00024		7.89302	-0.00044		7.48175	-0.00502
7.8968	-0.00076		7.89726	-0.00011		7.90121	-0.00035		7.48994	-0.00427
7.90499	-0.00081		7.90544	-9e-05		7.9094	-0.00034		7.49813	-0.00101
7.91318	-0.00073		7.91363	-0.00011		7.91758	-0.00034		7.50632	0.001519
7.92137	-0.00052		7.92182	-0.00013		7.92577	-0.00034		7.51451	0.002384
7.92956	-0.00032		7.93001	-0.00017		7.93396	-0.00034		7.5227	0.002737
7.93775	-0.00031		7.9382	-0.00023		7.94215	0.000106		7.53089	0.002299
7.94594	-0.00032		7.94639	-0.00028		7.95034	0.000267		7.53908	0.001861
7.95413	-0.00032		7.95458	-0.00028		7.95853	0.000291		7.54727	0.00062
7.96232	-0.00046		7.96277	-0.00029		7.96672	0.000296		7.55546	-0.00074
7.97051	-0.00073		7.97096	-0.0003		7.97491	0.000272		7.56365	-0.00085
7.9787	-0.00051		7.97915	-0.00026		7.9831	0.000247		7.57184	-0.00097
7.98689	-0.00048		7.98734	-0.00024		7.99129	0.000129		7.58003	-0.00134
7.99508	-0.00046		7.99553	-0.00027		7.99948	9.82e-05		7.58821	-0.00146
8.00327	-0.00047		8.00372	-0.00029		8.00767	6.76e-05		7.5964	-0.00158
8.01146	-0.00048		8.01191	-0.00034		8.01586	-8.3e-05		7.60459	-0.00132
8.01965	-0.00024		8.0201	-0.00031		8.02405	-0.00018		7.61278	-0.00223
8.02784	-0.00021		8.02829	-0.00028		8.03224	-0.00028		7.62097	-0.00314
8.03603	-0.00022		8.03648	-0.00027		8.04043	-0.00047		7.62916	-0.00523
8.04422	-0.00022		8.04467	-0.00027		8.04862	-0.00047		7.63735	-0.00577
8.05241	-0.00024		8.05286	-0.00023		8.05681	-0.00048		7.64554	-0.00564
8.0606	-0.00086		8.06105	-0.00022		8.065	-0.00048		7.65373	-0.00551
8.06879	-0.00084		8.06924	-0.00022		8.07319	-0.00055		7.66192	-0.00351
8.07698	-0.00078		8.07743	-0.00022		8.08138	-0.00036		7.67011	0.002544
8.08517	-0.00072		8.08562	-0.00022		8.08957	-0.00036		7.6783	0.001946
8.09336	-0.0006		8.09381	-0.00022		8.09776	-0.00035		7.68649	0.001348
8.10155	-0.00054		8.102	-0.00024		8.10595	-0.00026		7.69468	-0.00041
8.10974	-0.00052		8.11019	-0.00027		8.11414	-0.00024		7.70287	-0.00534
8.11793	-0.00054		8.11838	-0.00018		8.12233	-0.00023		7.71106	-0.00869
8.12612	-0.00057		8.12657	-0.00013		8.13052	0.000535		7.71925	-0.00821
8.13431	-0.00071		8.13476	-0.0001		8.13871	0.000542		7.72744	-0.00552
8.1425	-0.00072		8.14295	-0.0001		8.1469	0.000475		7.73563	-0.00511
8.15069	-0.00062		8.15114	-0.0001		8.15509	0.000407		7.74382	-0.0047
8.15888	-0.0006		8.15933	-0.0001		8.16328	5.78e-05		7.75201	-0.00429
8.16707	-0.00059		8.16752	-0.00013		8.17147	-0.00018		7.7602	-0.00338
8.17526	-0.00059		8.17571	-0.00025		8.17966	-0.00046		7.76839	-0.00291
8.18345	-0.00065		8.1839	-0.00027		8.18785	-0.00042		7.77658	-0.00266
8.19164	-0.0007		8.19209	-0.00029		8.19604	-0.0004		7.78477	-0.00324
8.19983	-0.00065		8.20028	-0.00034		8.20423	-0.0004		7.79296	-0.00382
8.20801	-0.00064		8.20847	-0.00031		8.21242	-0.0004		7.80115	-0.00499
8.21621	-0.00064		8.21666	-0.0002		8.22061	-0.00042		7.80934	-0.0056
8.22439	-0.00065		8.22485	-0.0002		8.2288	-0.00044		7.81753	-0.00431
8.23259	-0.00065		8.23304	-0.0002		8.23699	-0.00044		7.82572	-0.00397
8.24077	-0.00068		8.24123	-0.00022		8.24518	-0.00043		7.83391	-0.0037
8.24896	-0.00083		8.24942	-0.00026		8.25337	-0.00018		7.8421	-0.00155
8.25715	-0.00094		8.2576	-0.00024		8.26156	-0.00015		7.85029	0.001575
8.26534	-0.00076		8.2658	-0.00024		8.26975	-0.00018		7.85848	0.000295
8.27353	-0.00073		8.27398	-0.00024		8.27794	-0.00021		7.86667	-0.00099
8.28172	-0.0007		8.28218	-0.00024		8.28613	-0.00028		7.87486	-0.00381
8.28991	-0.00069		8.29036	-0.00031		8.29431	-0.00031		7.88305	-0.00585
8.2981	-0.00072		8.29855	-0.00037		8.30251	-0.00028		7.89124	-0.00064
8.30629	-0.00074		8.30674	-0.00029		8.3107	-0.00027		7.89943	0.001183
8.31448	-0.00085		8.31493	-0.00025		8.31888	-0.00028		7.90762	0.001771
8.32267	-0.00085		8.32312	-0.00025		8.32708	-0.00028		7.91581	0.000695
8.33086	-0.00071		8.33131	-0.00024		8.33526	-0.00038		7.924	-0.00038
8.33905	-0.00069		8.3395	-0.00024		8.34345	-0.00033		7.93218	-0.0018
8.34724	-0.00067		8.34769	-0.00024		8.35164	-0.00031		7.94038	-0.00203
8.35543	-0.00051		8.35588	-0.00028		8.35983	-0.00029		7.94857	-0.00227
8.36362	-0.00051		8.36407	-0.00033		8.36802	-0.00029		7.95676	-0.00304
8.37181	-0.00051		8.37226	-0.00025		8.37621	-0.00036		7.96494	-0.00328
8.38	-0.00051		8.38045	-0.00025		8.3844	-0.00044		7.97313	-0.00585
8.38819	-0.00059		8.38864	-0.00026		8.39259	-0.00048		7.98132	-0.00888
8.39638	-0.0006		8.39683	-0.00027		8.40078	-0.00049		7.98951	-0.00628
8.40457	-0.00074		8.40502	-0.00034		8.40897	-0.0005		7.9977	-0.00435
8.41276	-0.00075		8.41321	-0.00033		8.41716	-0.0005		8.00589	-0.00421
8.42095	-0.00075		8.4214	-0.00034		8.42535	-0.00048		8.01408	-0.00622
8.42914	-0.00077		8.42959	-0.00034		8.43354	-0.00048		8.02227	-0.00824
8.43733	-0.00074		8.43778	-0.00035		8.44173	-0.00048		8.03046	-0.00816
8.44552	-0.00073		8.44597	-0.00026		8.44992	-0.00049		8.03865	-0.0041
8.45371	-0.00072		8.45416	-0.00023		8.45811	-0.00041		8.04684	-0.00272
8.4619	-0.00072		8.46235	-0.00021		8.4663	-0.0004		8.05503	-0.00281
8.47009	-0.00077		8.47054	-0.00021		8.47449	-0.0004		8.06322	-0.0029
8.47828	-0.00082		8.47873	-0.00021		8.48268	-0.00039		8.07141	-0.00583
8.48647	-0.00096		8.48692	-0.00021		8.49087	-0.00041		8.0796	-0.00797
8.49466	-0.00094		8.49511	-0.00022		8.49906	-0.00043		8.08779	-0.00778
8.50285	-0.0009		8.5033	-0.00029		8.50725	-0.00041		8.09598	-0.00343
8.51104	-0.00088		8.51149	-0.00034		8.51544	-3.4e-06		8.10417	-0.00184
8.51923	-0.00089		8.51968	-0.00034		8.52363	0.00039		8.11236	-0.00129
8.52742	-0.0009		8.52787	-0.00034		8.53182	0.000573		8.12055	-0.00181
8.53561	-0.00097		8.53606	-0.00035		8.54001	0.000635		8.12874	-0.00233
8.5438	-0.00096		8.54425	-0.00036		8.5482	0.00053		8.13693	-0.00322
8.55199	-0.00094		8.55244	-0.0004		8.55639	0.000425		8.14512	-0.00067
8.56018	-0.00094		8.56063	-0.00042		8.56458	-0.00015		8.15331	0.000942
8.56837	-0.00094		8.56882	-0.00037		8.57277	-0.00044		8.1615	0.001047
8.57656	-0.00084		8.57701	-0.00026		8.58096	-0.0004		8.16969	0.001051
8.58474	-0.00082		8.5852	-0.00026		8.58915	-0.00039		8.17788	0.001005
8.59294	-0.0008		8.59339	-0.00027		8.59734	-0.00039		8.18607	0.000959
8.60112	-0.0008		8.60158	-0.00027		8.60553	-0.00039		8.19426	-0.00146
8.60932	-0.0008		8.60977	-0.00029		8.61372	-0.00039		8.20245	-0.00107
8.6175	-0.0008		8.61796	-0.00041		8.62191	-9.7e-05		8.21064	-0.00047
8.62569	-0.00088		8.62615	-0.00036		8.6301	-3.2e-05		8.21883	-0.00032
8.63388	-0.00104		8.63434	-0.00034		8.63829	-3.9e-06		8.22702	-0.00124
8.64207	-0.00101		8.64252	-0.00033		8.64648	2.42e-05		8.23521	-0.00215
8.65026	-0.00092		8.65071	-0.00032		8.65467	0.000221		8.2434	-0.00516
8.65845	-0.00091		8.65891	-0.00033		8.66286	0.000315		8.25159	-0.00797
8.66664	-0.00085		8.66709	-0.00034		8.67104	0.000119		8.25978	-0.00824
8.67483	-0.00083		8.67528	-0.00036		8.67924	-7.8e-05		8.26797	-0.0053
8.68302	-0.00084		8.68347	-0.00036		8.68742	-0.00048		8.27616	-0.00127
8.69121	-0.00085		8.69166	-0.00033		8.69562	-0.00047		8.28435	-0.00174
8.6994	-0.00088		8.69985	-0.00033		8.7038	-0.00046		8.29254	-0.00222
8.70759	-0.00096		8.70804	-0.00034		8.71199	-0.00046		8.30073	-0.00346
8.71578	-0.00085		8.71623	-0.00035		8.72018	-0.00046		8.30892	-0.00642
8.72397	-0.00083		8.72442	-0.00041		8.72837	-0.00038		8.3171	-0.00582
8.73216	-0.00086		8.73261	-0.00059		8.73656	-0.00026		8.3253	-0.00145
8.74035	-0.00088		8.7408	-0.00047		8.74475	0.000275		8.33348	0.002259
8.74854	-0.00094		8.74899	-0.00044		8.75294	0.000369		8.34168	0.003367
8.75673	-0.00094		8.75718	-0.00041		8.76113	0.000406		8.34986	0.003391
8.76492	-0.00095		8.76537	-0.00039		8.76932	0.000258		8.35805	0.003377
8.77311	-0.00097		8.77356	-0.00034		8.77751	0.000111		8.36624	0.003363
8.7813	-0.00103		8.78175	-0.00033		8.7857	0.000453		8.37443	0.0023
8.78949	-0.00102		8.78994	-0.00033		8.79389	0.000457		8.38262	0.001311
8.79768	-0.00101		8.79813	-0.00033		8.80208	0.000457		8.39081	0.00022
8.80587	-0.00101		8.80632	-0.00034		8.81027	0.000434		8.399	-0.00225
8.81406	-0.00093		8.81451	-0.00034		8.81846	0.000412		8.40719	-0.00405
8.82225	-0.00092		8.8227	-0.00037		8.82665	-0.0002		8.41538	-0.00369
8.83044	-0.00091		8.83089	-0.00033		8.83484	-0.00029		8.42357	-0.00367
8.83863	-0.00091		8.83908	-0.00033		8.84303	-0.00026		8.43176	-0.00374
8.84682	-0.00087		8.84727	-0.00033		8.85122	-0.00026		8.43995	-0.00382
8.85501	-0.00083		8.85546	-0.00034		8.85941	-0.00026		8.44814	-0.00462
8.8632	-0.00083		8.86365	-0.0004		8.8676	-0.00025		8.45633	-0.00878
8.87139	-0.00083		8.87184	-0.00042		8.87579	-0.00025		8.46452	-0.01075
8.87958	-0.00083		8.88003	-0.00044		8.88398	-0.00026		8.47271	-0.00991
8.88777	-0.00083		8.88822	-0.00032		8.89217	-0.00028		8.4809	-0.00954
8.89596	-0.00085		8.89641	-0.0003		8.90036	-0.00032		8.48909	-0.00916
8.90415	-0.00088		8.9046	-0.0003		8.90855	0.000895		8.49728	-0.0079
8.91234	-0.00095		8.91279	-0.0003		8.91674	0.001211		8.50547	-0.00681
8.92053	-0.00095		8.92098	-0.0003		8.92493	0.00121		8.51366	-0.00584
8.92872	-0.00095		8.92917	-0.00028		8.93312	0.00121		8.52185	-0.00398
8.93691	-0.00096		8.93736	-0.00028		8.94131	0.001185		8.53004	-0.00195
8.9451	-0.00094		8.94555	-0.00028		8.9495	0.000543		8.53823	0.000867
8.95329	-0.00087		8.95374	-0.00028		8.95769	-0.00032		8.54642	0.00238
8.96148	-0.00088		8.96193	-0.00029		8.96588	-0.00047		8.55461	0.002782
8.96967	-0.00088		8.97012	-0.0003		8.97407	-0.00049		8.5628	0.001237
8.97785	-0.00089		8.97831	-0.00034		8.98226	-0.00051		8.57099	-0.00031
8.98605	-0.00089		8.9865	-0.00037		8.99045	-0.00051		8.57918	-0.00028
8.99423	-0.00089		8.99469	-0.0005		8.99864	-0.00047		8.58737	-0.00071
9.00242	-0.0009		9.00288	-0.00045		9.00683	-0.00046		8.59556	-0.00114
9.01061	-0.00091		9.01107	-0.00044		9.01502	-0.00046		8.60375	-0.0027
9.0188	-0.00092		9.01925	-0.00042		9.02321	-0.00046		8.61194	-0.00283
9.02699	-0.00096		9.02745	-0.00036		9.0314	-0.00055		8.62013	-0.00296
9.03518	-0.00086		9.03563	-0.00033		9.03959	-0.00054		8.62832	-0.00461
9.04337	-0.00085		9.04383	-0.0003		9.04777	-0.00053		8.63651	-0.00343
9.05156	-0.00084		9.05201	-0.0003		9.05597	-0.00051		8.6447	-0.00342
9.05975	-0.00079		9.0602	-0.0003		9.06415	3.6e-05		8.65289	-0.00582
9.06794	-0.00076		9.06839	-0.00032		9.07235	2.98e-05		8.66108	-0.00822
9.07613	-0.00074		9.07658	-0.00042		9.08053	2.36e-05		8.66927	-0.00685
9.08432	-0.00073		9.08477	-0.00049		9.08872	-4.2e-05		8.67746	-0.00427
9.09251	-0.00066		9.09296	-0.00046		9.09691	-0.0002		8.68564	-0.00388
9.1007	-0.00063		9.10115	-0.00044		9.1051	-0.00012		8.69383	-0.00469
9.10889	-0.00064		9.10934	-0.00043		9.11329	-0.00013		8.70203	-0.0055
9.11708	-0.00065		9.11753	-0.00041		9.12148	-0.00013		8.71021	-0.00386
9.12527	-0.00075		9.12572	-0.00041		9.12967	-0.00017		8.71841	-0.00331
9.13346	-0.00081		9.13391	-0.00041		9.13786	-0.00049		8.72659	-0.00429
9.14165	-0.00081		9.1421	-0.00038		9.14605	-0.00053		8.73478	-0.00527
9.14984	-0.00081		9.15029	-0.00037		9.15424	-0.00043		8.74297	-0.00673
9.15803	-0.00082		9.15848	-0.00035		9.16243	-0.00034		8.75116	-0.00812
9.16622	-0.00082		9.16667	-0.00034		9.17062	-0.0003		8.75935	-0.00899
9.17441	-0.00083		9.17486	-0.00032		9.17881	-0.00029		8.76754	-0.00765
9.1826	-0.00078		9.18305	-0.00022		9.187	-0.00029		8.77573	-0.00562
9.19079	-0.00074		9.19124	-0.00022		9.19519	-0.00029		8.78392	-0.00485
9.19898	-0.0007		9.19943	-0.00022		9.20338	-0.0003		8.79211	-0.00467
9.20717	-0.00067		9.20762	-0.00022		9.21157	-0.00032		8.8003	-0.00448
9.21536	-0.00065		9.21581	-0.00027		9.21976	-0.00037		8.80849	-0.00385
9.22355	-0.0006		9.224	-0.0003		9.22795	-0.00051		8.81668	-0.00257
9.23174	-0.0006		9.23219	-0.00033		9.23614	-0.0005		8.82487	-0.00194
9.23993	-0.00061		9.24038	-0.00028		9.24433	-8.2e-05		8.83306	-0.00231
9.24812	-0.00063		9.24857	-0.00028		9.25252	0.000105		8.84125	-0.00267
9.25631	-0.00077		9.25676	-0.00028		9.26071	9.66e-05		8.84944	-0.00406
9.2645	-0.00084		9.26495	-0.00028		9.2689	8.86e-05		8.85763	-0.0034
9.27269	-0.0008		9.27314	-0.00028		9.27709	6.34e-05		8.86582	-0.00316
9.28088	-0.00079		9.28133	-0.00032		9.28528	1.11e-05		8.87401	-0.00316
9.28907	-0.00079		9.28952	-0.00039		9.29347	-9.5e-05		8.8822	-0.00317
9.29726	-0.00081		9.29771	-0.00048		9.30166	-0.00033		8.89039	-0.00388
9.30545	-0.00083		9.3059	-0.00036		9.30985	-0.00047		8.89858	-0.00566
9.31364	-0.00086		9.31409	-0.00036		9.31804	-0.00041		8.90677	-0.0029
9.32183	-0.00092		9.32228	-0.00036		9.32623	-0.00035		8.91496	-2.8e-05
9.33002	-0.00101		9.33047	-0.00036		9.33442	-0.00032		8.92315	0.001095
9.33821	-0.00106		9.33866	-0.00037		9.34261	-0.0003		8.93134	0.001027
9.34639	-0.00082		9.34685	-0.0004		9.3508	-0.00029		8.93953	0.000959
9.35459	-0.00079		9.35504	-0.00041		9.35899	-0.00024		8.94772	-0.00332
9.36277	-0.00079		9.36323	-0.00041		9.36718	-0.00021		8.95591	-0.01038
9.37096	-0.00079		9.37142	-0.00041		9.37537	-0.00022		8.9641	-0.01416
9.37915	-0.0008		9.37961	-0.00044		9.38356	-0.00022		8.97229	-0.01278
9.38734	-0.00101		9.3878	-0.00049		9.39175	-0.00025		8.98048	-0.00804
9.39553	-0.00083		9.39598	-0.00047		9.39994	-0.00029		8.98867	-0.00198
9.40372	-0.00081		9.40418	-0.00034		9.40813	-0.00029		8.99686	-2.1e-05
9.41191	-0.00056		9.41236	-0.00034		9.41632	-0.00029		9.00505	0.000518
9.4201	-0.00048		9.42056	-0.00034		9.42451	-0.00029		9.01324	-0.00097
9.42829	-0.00044		9.42874	-0.00034		9.4327	-0.00041		9.02143	-0.00245
9.43648	-0.00048		9.43693	-0.00035		9.44088	-0.00056		9.02962	-0.00321
9.44467	-0.00053		9.44512	-0.00046		9.44908	-0.00056		9.03781	-0.00077
9.45286	-0.00063		9.45331	-0.00039		9.45726	-0.00057		9.046	0.001738
9.46105	-0.00062		9.4615	-0.00039		9.46545	-0.00057		9.05419	0.001378
9.46924	-0.00061		9.46969	-0.00039		9.47364	-0.00061		9.06238	0.001018
9.47743	-0.00061		9.47788	-0.00038		9.48183	-0.00048		9.07057	0.000153
9.48562	-0.00064		9.48607	-0.00038		9.49002	-0.00022		9.07875	-0.00231
9.49381	-0.00066		9.49426	-0.00038		9.49821	-0.00023		9.08695	-0.00436
9.502	-0.00069		9.50245	-0.00038		9.5064	-0.00024		9.09514	-0.0057
9.51019	-0.00032		9.51064	-0.00039		9.51459	-0.00035		9.10332	-0.00497
9.51838	-0.00014		9.51883	-0.00042		9.52278	-0.00061		9.11151	-0.00396
9.52657	-5.7e-05		9.52702	-0.00048		9.53097	-0.00055		9.1197	-0.00382
9.53476	-0.00021		9.53521	-0.00051		9.53916	-0.00054		9.12789	-0.00409
9.54295	-0.00036		9.5434	-0.00058		9.54735	-0.00053		9.13608	-0.00436
9.55114	-0.00067		9.55159	-0.00049		9.55554	-0.00034		9.14427	-0.00601
9.55933	-0.00094		9.55978	-0.00047		9.56373	-0.00028		9.15246	-0.00888
9.56752	-0.00097		9.56797	-0.00046		9.57192	-0.00028		9.16065	-0.01003
9.57571	-0.00099		9.57616	-0.00046		9.58011	-0.00029		9.16884	-0.01027
9.5839	-0.00101		9.58435	-0.00045		9.5883	-0.0003		9.17703	-0.00976
9.59209	-0.00105		9.59254	-0.00045		9.59649	-0.00014		9.18522	-0.00836
9.60028	-0.00091		9.60073	-0.00046		9.60468	2.98e-05		9.19341	-0.00629
9.60847	-0.00075		9.60892	-0.00046		9.61287	-4.8e-05		9.2016	-0.00178
9.61666	-0.0006		9.61711	-0.00049		9.62106	-0.00013		9.20979	-0.00225
9.62485	-0.00059		9.6253	-0.00058		9.62925	-0.00031		9.21798	-0.00273
9.63304	-0.00059		9.63349	-0.00055		9.63744	-0.00035		9.22617	-0.005
9.64123	-0.00059		9.64168	-0.00049		9.64563	-0.00047		9.23436	-0.00629
9.64942	-0.0006		9.64987	-0.00046		9.65382	-0.00051		9.24255	-0.00181
9.65761	-0.00064		9.65806	-0.00044		9.66201	-0.00031		9.25074	-0.00109
9.6658	-0.00082		9.66625	-0.00041		9.6702	-0.00028		9.25893	-0.00086
9.67399	-0.00077		9.67444	-0.00038		9.67839	-0.00031		9.26712	-0.00129
9.68218	-0.00076		9.68263	-0.00026		9.68658	-0.00034		9.27531	-0.00171
9.69037	-0.00075		9.69082	-0.00019		9.69477	-0.00041		9.2835	-0.00256
9.69856	-0.00071		9.69901	-0.00018		9.70296	-0.00046		9.29169	-0.00236
9.70675	-0.00053		9.7072	-0.00018		9.71115	-0.00053		9.29988	-0.00227
9.71494	-0.00053		9.71539	-0.00018		9.71934	-0.00065		9.30807	-0.00309
9.72312	-0.00053		9.72358	-0.00019		9.72753	-0.00055		9.31626	-0.0039
9.73132	-0.00052		9.73177	-0.0004		9.73572	-0.0005		9.32445	-0.00764
9.7395	-0.0004		9.73996	-0.00049		9.74391	-0.00047		9.33264	-0.0104
9.7477	-0.00044		9.74815	-0.00058		9.7521	-0.00045		9.34083	-0.00774
9.75588	-0.00049		9.75634	-0.00061		9.76029	-0.00044		9.34902	-0.00398
9.76407	-0.00061		9.76453	-0.00045		9.76848	-0.0004		9.35721	-0.0028
9.77226	-0.00068		9.77272	-0.00043		9.77667	-0.00039		9.3654	-0.00241
9.78045	-0.00067		9.78091	-0.00043		9.78486	-0.0004		9.37359	-0.00446
9.78864	-0.00067		9.78909	-0.00043		9.79305	-0.00042		9.38178	-0.00652
9.79683	-0.00069		9.79729	-0.00043		9.80124	-0.00046		9.38997	-0.00858
9.80502	-0.00071		9.80547	-0.00041		9.80942	-0.00045		9.39816	-0.00744
9.81321	-0.00075		9.81367	-0.0004		9.81761	-0.00044		9.40635	-0.00677
9.8214	-0.00079		9.82185	-0.0004		9.82581	-0.00044		9.41454	-0.0066
9.82959	-0.0009		9.83004	-0.0004		9.83399	-0.00036		9.42273	-0.00555
9.83778	-0.00095		9.83823	-0.0004		9.84218	-0.00031		9.43092	-0.00564
9.84597	-0.00086		9.84642	-0.00046		9.85037	-0.00026		9.43911	-0.00573
9.85416	-0.00082		9.85461	-0.00048		9.85856	-0.00024		9.4473	-0.00594
9.86235	-0.00084		9.8628	-0.0005		9.86675	-0.00022		9.45548	-0.00675
9.87054	-0.00086		9.87099	-0.00059		9.87494	-0.00025		9.46368	-0.00831
9.87873	-0.0009		9.87918	-0.00055		9.88313	-0.00028		9.47186	-0.00911
9.88692	-0.00094		9.88737	-0.00047		9.89132	-0.00035		9.48006	-0.00639
9.89511	-0.00082		9.89556	-0.00047		9.89951	-0.00048		9.48824	-0.00612
9.9033	-0.0008		9.90375	-0.00047		9.9077	-0.00045		9.49643	-0.00635
9.91149	-0.00079		9.91194	-0.00047		9.91589	-0.00046		9.50462	-0.00658
9.91968	-0.00078		9.92013	-0.00047		9.92408	-0.00047		9.51281	-0.00686
9.92787	-0.00077		9.92832	-0.00048		9.93227	-0.00058		9.521	-0.00302
9.93606	-0.00077		9.93651	-0.00056		9.94046	-0.00053		9.52919	0.001247
9.94425	-0.00077		9.9447	-0.00046		9.94865	-0.00035		9.53738	0.00111
9.95244	-0.00071		9.95289	-0.00046		9.95684	-0.00032		9.54557	0.000973
9.96063	-0.0007		9.96108	-0.00045		9.96503	-0.00037		9.55376	0.000654
9.96882	-0.0007		9.96927	-0.00045		9.97322	-0.00042		9.56195	0.000572
9.97701	-0.00071		9.97746	-0.00046		9.98141	-0.00053		9.57014	0.00049
9.9852	-0.00071		9.98565	-0.00047		9.9896	-0.00056		9.57833	0.00032
9.99339	-0.00085		9.99384	-0.0005		9.99779	-0.00043		9.58652	0.000996
10.0016	-0.00093		10.002	-0.00057		10.006	-0.00033		9.59471	0.000741
10.0098	-0.00077		10.0102	-0.00063		10.0142	-0.0003		9.6029	0.000485
10.018	-0.0007		10.0184	-0.00059		10.0224	-0.0002		9.61109	-0.00138
10.0261	-0.00068		10.0266	-0.00047		10.0305	-0.00016		9.61928	-0.00018
10.0343	-0.00068		10.0348	-0.00047		10.0387	-0.00022		9.62747	0.000981
10.0425	-0.00068		10.043	-0.0004		10.0469	-0.00028		9.63566	0.002398
10.0507	-0.00068		10.0512	-0.00038		10.0551	-0.00042		9.64385	0.004376
10.0589	-0.00069		10.0594	-0.00038		10.0633	-0.00042		9.65204	0.004122
10.0671	-0.00072		10.0676	-0.00038		10.0715	-0.00043		9.66023	0.003868
10.0753	-0.00076		10.0757	-0.00038		10.0797	-0.00044		9.66842	0.002978
10.0835	-0.00085		10.0839	-0.00041		10.0879	-0.00046		9.67661	0.00041
10.0917	-0.00083		10.0921	-0.00049		10.0961	-0.00046		9.6848	-0.00085
10.0999	-0.00074		10.1003	-0.00044		10.1043	-0.00046		9.69299	-0.00085
10.1081	-0.00074		10.1085	-0.0004		10.1125	-0.00047		9.70118	-0.00085
10.1162	-0.00075		10.1167	-0.00038		10.1206	-0.00037		9.70937	-0.00225
10.1244	-0.00075		10.1249	-0.00039		10.1288	-0.00038		9.71756	-0.00244
10.1326	-0.0008		10.1331	-0.0004		10.137	-0.00038		9.72575	-0.00176
10.1408	-0.0008		10.1413	-0.00043		10.1452	-0.00039		9.73394	-0.00182
10.149	-0.00079		10.1494	-0.00048		10.1534	-0.00049		9.74213	-0.00188
10.1572	-0.00079		10.1576	-0.00053		10.1616	-0.00049		9.75032	-0.00241
10.1654	-0.00079		10.1658	-0.00049		10.1698	-0.0005		9.75851	-3.1e-05
10.1736	-0.00079		10.174	-0.00048		10.178	-0.0005		9.7667	0.003166
10.1817	-0.00084		10.1822	-0.00047		10.1862	-0.00051		9.77489	0.003833
10.1899	-0.00089		10.1904	-0.00047		10.1944	-0.00052		9.78308	0.004303
10.1981	-0.00089		10.1986	-0.00047		10.2025	-0.00053		9.79127	0.004259
10.2063	-0.00089		10.2068	-0.00048		10.2107	-0.00054		9.79946	0.004216
10.2145	-0.00089		10.215	-0.00052		10.2189	-0.00056		9.80765	0.003443
10.2227	-0.0009		10.2232	-0.00047		10.2271	-0.00054		9.81584	-0.00044
10.2309	-0.00099		10.2313	-0.00047		10.2353	-0.00052		9.82403	-0.00431
10.2391	-0.00104		10.2395	-0.00047		10.2435	-0.00045		9.83221	-0.00485
10.2473	-0.00063		10.2477	-0.00048		10.2517	-0.00045		9.84041	-0.00343
10.2555	-0.00047		10.2559	-0.00049		10.2599	-0.00045		9.84859	-0.00201
10.2637	-0.0004		10.2641	-0.00053		10.2681	-0.00045		9.85679	-0.00143
10.2718	-0.00039		10.2723	-0.00045		10.2762	-0.00048		9.86497	-0.00117
10.28	-0.00057		10.2805	-0.00044		10.2844	-0.00054		9.87316	-0.00231
10.2882	-0.00076		10.2887	-0.00045		10.2926	-0.00052		9.88135	-0.00345
10.2964	-0.00066		10.2969	-0.00046		10.3008	-0.00053		9.88954	-0.00602
10.3046	-0.00065		10.305	-0.00048		10.309	-0.00053		9.89773	-0.00631
10.3128	-0.00065		10.3132	-0.0005		10.3172	-0.00054		9.90592	-0.00587
10.321	-0.00065		10.3214	-0.00051		10.3254	-0.00024		9.91411	-0.0058
10.3292	-0.0007		10.3296	-0.00055		10.3336	-0.0002		9.9223	-0.00627
10.3374	-0.00072		10.3378	-0.00049		10.3418	-0.00018		9.93049	-0.00673
10.3455	-0.00074		10.346	-0.00046		10.3499	-0.00019		9.93868	-0.00615
10.3537	-0.00083		10.3542	-0.00047		10.3581	-0.0002		9.94687	-0.00646
10.3619	-0.00057		10.3624	-0.00048		10.3663	-0.00029		9.95506	-0.00678
10.3701	-0.00045		10.3706	-0.00049		10.3745	-0.00035		9.96325	-0.0102
10.3783	-0.00052		10.3788	-0.00058		10.3827	-0.0004		9.97144	-0.00886
10.3865	-0.00059		10.387	-0.00059		10.3909	-0.0004		9.97963	-0.00773
10.3947	-0.00074		10.3951	-0.00057		10.3991	-0.00041		9.98782	-0.008
10.4029	-0.00047		10.4033	-0.00057		10.4073	-0.00042		9.99601	-0.00826
10.4111	-0.00045		10.4115	-0.00056		10.4155	-0.00044		10.0042	-0.00884
10.4193	-0.00044		10.4197	-0.00055		10.4237	-0.00041		10.0124	-0.00755
10.4275	-0.00044		10.4279	-0.00054		10.4319	-0.00037		10.0206	-0.00746
10.4356	-0.00044		10.4361	-0.00051		10.44	-0.00035		10.0288	-0.00829
10.4438	-0.00046		10.4443	-0.00049		10.4482	-0.00035		10.037	-0.00913
10.452	-0.00047		10.4525	-0.00048		10.4564	-0.00035		10.0451	-0.00572
10.4602	-0.00059		10.4607	-0.00046		10.4646	-0.00037		10.0533	-0.00347
10.4684	-0.00078		10.4688	-0.00046		10.4728	-0.00039		10.0615	-0.00358
10.4766	-0.0008		10.477	-0.00046		10.481	-0.00042		10.0697	-0.0037
10.4848	-0.00074		10.4852	-0.00048		10.4892	-0.00044		10.0779	-0.00471
10.493	-0.00071		10.4934	-0.00049		10.4974	-0.00045		10.0861	-0.00706
10.5012	-0.00073		10.5016	-0.00062		10.5056	-0.00046		10.0943	-0.00776
10.5093	-0.00074		10.5098	-0.00058		10.5137	-0.0005		10.1025	-0.00681
10.5175	-0.00079		10.518	-0.0005		10.5219	-0.00053		10.1107	-0.00477
10.5257	-0.0008		10.5262	-0.0005		10.5301	-0.00056		10.1189	-0.00541
10.5339	-0.00085		10.5344	-0.0005		10.5383	-0.00058		10.1271	-0.00605
10.5421	-0.00103		10.5426	-0.0005		10.5465	-0.00043		10.1352	-0.00758
10.5503	-0.00113		10.5508	-0.0005		10.5547	-0.00015		10.1434	-0.00712
10.5585	-0.00086		10.5589	-0.00052		10.5629	-0.00015		10.1516	-0.00523
10.5667	-0.00086		10.5671	-0.00057		10.5711	-0.00015		10.1598	-0.00453
10.5749	-0.00086		10.5753	-0.0005		10.5793	-0.00018		10.168	-0.00467
10.5831	-0.00087		10.5835	-0.00049		10.5875	-0.00032		10.1762	-0.0048
10.5912	-0.0009		10.5917	-0.00049		10.5956	-0.00032		10.1844	-0.0021
10.5994	-0.00105		10.5999	-0.0005		10.6038	-0.00033		10.1926	-0.00199
10.6076	-0.00103		10.6081	-0.00053		10.612	-0.00034		10.2008	-0.00197
10.6158	-0.00101		10.6163	-0.00066		10.6202	-0.00035		10.2089	-0.00195
10.624	-0.00094		10.6244	-0.00062		10.6284	-0.00047		10.2171	-0.00046
10.6322	-0.00091		10.6326	-0.00055		10.6366	-0.0004		10.2253	-0.00031
10.6404	-0.00089		10.6408	-0.00052		10.6448	-0.00039		10.2335	-0.00051
10.6486	-0.00077		10.649	-0.0005		10.653	-0.0004		10.2417	-0.00072
10.6568	-0.00074		10.6572	-0.00049		10.6612	-0.00041		10.2499	-0.0006
10.6649	-0.00072		10.6654	-0.00045		10.6693	-0.00043		10.2581	-0.0009
10.6731	-0.00072		10.6736	-0.00043		10.6775	-0.00047		10.2663	-0.0012
10.6813	-0.00074		10.6818	-0.00042		10.6857	-0.00065		10.2745	-0.00309
10.6895	-0.00076		10.69	-0.00044		10.6939	-0.00054		10.2827	-0.00355
10.6977	-0.00089		10.6982	-0.00045		10.7021	-0.00054		10.2908	-0.00401
10.7059	-0.001		10.7064	-0.00037		10.7103	-0.00054		10.299	-0.00644
10.7141	-0.00088		10.7145	-0.00033		10.7185	-0.00054		10.3072	-0.00693
10.7223	-0.00088		10.7227	-0.00033		10.7267	-0.00052		10.3154	-0.00625
10.7305	-0.00089		10.7309	-0.00034		10.7349	-0.00047		10.3236	-0.00489
10.7387	-0.00091		10.7391	-0.00034		10.7431	-0.00047		10.3318	-0.0039
10.7469	-0.00095		10.7473	-0.00051		10.7513	-0.00047		10.34	-0.0044
10.755	-0.00095		10.7555	-0.00052		10.7594	-0.00047		10.3482	-0.0049
10.7632	-0.00096		10.7637	-0.00054		10.7676	-0.00047		10.3564	-0.00609
10.7714	-0.00092		10.7719	-0.00053		10.7758	-0.0005		10.3645	-0.00987
10.7796	-0.0009		10.7801	-0.00053		10.784	-0.00045		10.3727	-0.01005
10.7878	-0.0009		10.7882	-0.00054		10.7922	-0.00043		10.3809	-0.00878
10.796	-0.0009		10.7964	-0.00054		10.8004	-0.00042		10.3891	-0.00752
10.8042	-0.0009		10.8046	-0.00056		10.8086	-0.00042		10.3973	-0.00638
10.8124	-0.00091		10.8128	-0.0005		10.8168	-0.00037		10.4055	-0.00613
10.8206	-0.00091		10.821	-0.00046		10.825	-0.00037		10.4137	-0.00606
10.8287	-0.00091		10.8292	-0.00046		10.8331	-0.00037		10.4219	-0.00599
10.8369	-0.00093		10.8374	-0.00046		10.8413	-0.00038		10.4301	-0.00574
10.8451	-0.00095		10.8456	-0.00046		10.8495	-0.00038		10.4383	-0.0062
10.8533	-0.001		10.8538	-0.00046		10.8577	-0.00039		10.4465	-0.00666
10.8615	-0.00086		10.862	-0.00047		10.8659	-0.00039		10.4546	-0.00798
10.8697	-0.00085		10.8702	-0.00053		10.8741	-0.00039		10.4628	-0.00458
10.8779	-0.00085		10.8783	-0.00059		10.8823	-0.00039		10.471	-0.00056
10.8861	-0.00084		10.8865	-0.00059		10.8905	-0.0004		10.4792	-0.00036
10.8943	-0.00072		10.8947	-0.0006		10.8987	-0.00047		10.4874	-0.00079
10.9024	-0.00073		10.9029	-0.00062		10.9069	-0.00046		10.4956	-0.00123
10.9106	-0.00073		10.9111	-0.00063		10.9151	-0.00039		10.5038	-0.00314
10.9188	-0.00074		10.9193	-0.00055		10.9232	-0.00039		10.512	-0.00143
10.927	-0.00078		10.9275	-0.00048		10.9314	-0.00039		10.5202	-0.00014
10.9352	-0.00083		10.9357	-0.00047		10.9396	-0.00039		10.5283	0.000236
10.9434	-0.00093		10.9438	-0.00046		10.9478	-0.00039		10.5365	-7e-05
10.9516	-0.00073		10.952	-0.00045		10.956	-0.00033		10.5447	-0.00038
10.9598	-0.0007		10.9602	-0.00045		10.9642	-0.00034		10.5529	0.001252
10.968	-0.00069		10.9684	-0.00045		10.9724	-0.00035		10.5611	0.002221
10.9762	-0.00073		10.9766	-0.00045		10.9806	-0.00038		10.5693	0.002302
10.9843	-0.00076		10.9848	-0.00047		10.9887	-0.00047		10.5775	-0.00035
10.9925	-0.00092		10.993	-0.00054		10.9969	-0.00045		10.5857	-0.003
11.0007	-0.00101		11.0012	-0.00052		11.0051	-0.00045		10.5939	-0.00435
11.0089	-0.00093		11.0094	-0.00052		11.0133	-0.00044		10.6021	-0.00354
11.0171	-0.00083		11.0176	-0.00053		11.0215	-0.00043		10.6102	-0.00372
11.0253	-0.0008		11.0258	-0.00054		11.0297	-0.00039		10.6184	-0.0039
11.0335	-0.00079		11.0339	-0.00057		11.0379	-0.00025		10.6266	-0.00439
11.0417	-0.00078		11.0421	-0.00055		11.0461	-0.00019		10.6348	-0.00189
11.0499	-0.00068		11.0503	-0.00055		11.0543	-0.00013		10.643	0.00093
11.0581	-0.00068		11.0585	-0.00055		11.0625	0.000322		10.6512	-0.00013
11.0663	-0.00068		11.0667	-0.00056		11.0707	0.00015		10.6594	-0.00119
11.0744	-0.00069		11.0749	-0.00053		11.0788	-2.2e-05		10.6676	-0.00344
11.0826	-0.00071		11.0831	-0.00052		11.087	-0.00044		10.6758	-0.00918
11.0908	-0.00074		11.0913	-0.00053		11.0952	-0.00058		10.6839	-0.00775
11.099	-0.00085		11.0995	-0.00055		11.1034	-0.00063		10.6921	-0.00188
11.1072	-0.00097		11.1076	-0.00058		11.1116	-0.00058		10.7003	0.001525
11.1154	-0.00112		11.1158	-0.00058		11.1198	-0.00055		10.7085	0.002251
11.1236	-0.00113		11.124	-0.00058		11.128	-0.00053		10.7167	0.002067
11.1318	-0.00074		11.1322	-0.00058		11.1362	-0.00048		10.7249	0.001883
11.14	-0.00074		11.1404	-0.00058		11.1444	-0.00048		10.7331	-0.00219
11.1481	-0.00074		11.1486	-0.00058		11.1525	-0.00049		10.7413	-0.00389
11.1563	-0.00075		11.1568	-0.0006		11.1607	-0.0005		10.7495	-0.0035
11.1645	-0.00076		11.165	-0.00056		11.1689	-0.00052		10.7577	-0.00363
11.1727	-0.00084		11.1732	-0.00056		11.1771	-0.00045		10.7659	-0.00376
11.1809	-0.00085		11.1814	-0.00055		11.1853	-0.00044		10.774	-0.00494
11.1891	-0.00085		11.1896	-0.00051		11.1935	-0.00045		10.7822	-0.00511
11.1973	-0.00094		11.1977	-0.0005		11.2017	-0.00045		10.7904	-0.00633
11.2055	-0.00091		11.2059	-0.0005		11.2099	-0.00047		10.7986	-0.00489
11.2137	-0.0009		11.2141	-0.0005		11.2181	-0.00025		10.8068	-0.00086
11.2219	-0.00089		11.2223	-0.00051		11.2263	-0.00023		10.815	0.000378
11.2301	-0.00084		11.2305	-0.0006		11.2345	-0.00022		10.8232	0.000921
11.2382	-0.00083		11.2387	-0.00052		11.2426	-0.00023		10.8314	-0.00024
11.2464	-0.00083		11.2469	-0.00049		11.2508	-0.00024		10.8396	-0.0014
11.2546	-0.00083		11.2551	-0.00047		11.259	-0.00037		10.8477	-0.00109
11.2628	-0.00074		11.2633	-0.00048		11.2672	-0.00053		10.8559	-2.1e-05
11.271	-0.0007		11.2714	-0.00048		11.2754	-0.00046		10.8641	0.000276
11.2792	-0.00069		11.2796	-0.00054		11.2836	-0.00046		10.8723	0.000573
11.2874	-0.0007		11.2878	-0.00062		11.2918	-0.00045		10.8805	0.001669
11.2956	-0.0007		11.296	-0.00059		11.3	-0.00044		10.8887	0.005258
11.3038	-0.0007		11.3042	-0.00057		11.3082	-0.00039		10.8969	0.005174
11.3119	-0.00075		11.3124	-0.00056		11.3163	-0.00022		10.9051	0.005089
11.3201	-0.00079		11.3206	-0.00057		11.3245	-0.00024		10.9133	0.004552
11.3283	-0.00082		11.3288	-0.00058		11.3327	-0.00025		10.9215	0.004848
11.3365	-0.00089		11.337	-0.00061		11.3409	-0.0003		10.9297	0.004904
11.3447	-0.00095		11.3452	-0.0006		11.3491	-0.00039		10.9378	0.004836
11.3529	-0.00089		11.3533	-0.0006		11.3573	-0.00037		10.946	0.004769
11.3611	-0.00085		11.3615	-0.0006		11.3655	-0.00035		10.9542	0.002865
11.3693	-0.00084		11.3697	-0.0006		11.3737	0.000917		10.9624	-0.00075
11.3775	-0.00085		11.3779	-0.00057		11.3819	0.000904		10.9706	-0.00093
11.3857	-0.00087		11.3861	-0.00055		11.3901	0.000891		10.9788	-0.00112
11.3938	-0.00102		11.3943	-0.00052		11.3982	0.000765		10.987	-0.00131
11.402	-0.0009		11.4025	-0.00051		11.4064	-0.00012		10.9952	-0.00109
11.4102	-0.0009		11.4107	-0.0005		11.4146	-0.00015		11.0033	-0.00114
11.4184	-0.0009		11.4189	-0.0005		11.4228	-3.4e-05		11.0115	-0.0012
11.4266	-0.0009		11.427	-0.0005		11.431	-2.2e-05		11.0197	-0.00509
11.4348	-0.00091		11.4352	-0.00051		11.4392	-9.8e-06		11.0279	-0.00698
11.443	-0.00082		11.4434	-0.0005		11.4474	0.000156		11.0361	-0.00743
11.4512	-0.00077		11.4516	-0.0005		11.4556	0.000314		11.0443	-0.00844
11.4594	-0.00076		11.4598	-0.0005		11.4638	0.000229		11.0525	-0.00773
11.4675	-0.00074		11.468	-0.0005		11.4719	0.000145		11.0607	-0.0045
11.4757	-0.00074		11.4762	-0.00052		11.4801	-3e-05		11.0689	-0.0045
11.4839	-0.00073		11.4844	-0.00053		11.4883	-9.5e-05		11.0771	-0.0045
11.4921	-0.00075		11.4926	-0.00059		11.4965	-9.6e-05		11.0853	-0.00602
11.5003	-0.00077		11.5008	-0.00062		11.5047	-9.7e-05		11.0934	-0.01018
11.5085	-0.00079		11.509	-0.00061		11.5129	-9.9e-05		11.1016	-0.00892
11.5167	-0.00081		11.5171	-0.00061		11.5211	-0.00046		11.1098	-0.00546
11.5249	-0.00094		11.5253	-0.00061		11.5293	-0.00049		11.118	-0.00506
11.5331	-0.00096		11.5335	-0.00061		11.5375	-0.00047		11.1262	-0.00466
11.5413	-0.00099		11.5417	-0.00062		11.5457	-0.00046		11.1344	-0.00234
11.5495	-0.00107		11.5499	-0.00067		11.5539	-0.00041		11.1426	-0.00054
11.5576	-0.00099		11.5581	-0.00062		11.562	-0.00035		11.1508	0.000213
11.5658	-0.00097		11.5663	-0.00059		11.5702	-0.00035		11.159	-0.00081
11.574	-0.00096		11.5745	-0.00059		11.5784	-0.00035		11.1671	-0.00183
11.5822	-0.00096		11.5827	-0.00058		11.5866	-0.00036		11.1753	-0.008
11.5904	-0.00096		11.5908	-0.00054		11.5948	-0.00041		11.1835	-0.01294
11.5986	-0.0009		11.599	-0.00053		11.603	-0.00051		11.1917	-0.01248
11.6068	-0.00091		11.6072	-0.00052		11.6112	-0.00028		11.1999	-0.00914
11.615	-0.00093		11.6154	-0.00045		11.6194	0.002069		11.2081	-0.00465
11.6232	-0.00098		11.6236	-0.00044		11.6276	0.002086		11.2163	0.000535
11.6313	-0.0009		11.6318	-0.00044		11.6357	0.002092		11.2245	0.001717
11.6395	-0.00087		11.64	-0.00044		11.6439	0.001788		11.2327	0.002215
11.6477	-0.0008		11.6482	-0.00047		11.6521	0.001485		11.2409	0.001157
11.6559	-0.00079		11.6564	-0.00051		11.6603	-9.7e-05		11.2491	9.92e-05
11.6641	-0.00079		11.6646	-0.00047		11.6685	-0.0002		11.2572	-0.00022
11.6723	-0.00079		11.6728	-0.00045		11.6767	-0.0002		11.2654	0.000801
11.6805	-0.00079		11.6809	-0.00044		11.6849	-0.00021		11.2736	0.001
11.6887	-0.00079		11.6891	-0.00045		11.6931	-0.00021		11.2818	-6e-05
11.6969	-0.0008		11.6973	-0.00047		11.7013	-0.00022		11.29	-0.00112
11.705	-0.00089		11.7055	-0.00049		11.7095	-0.00027		11.2982	-0.00167
11.7132	-0.00108		11.7137	-0.00054		11.7176	-0.00032		11.3064	-0.00103
11.7214	-0.00115		11.7219	-0.00054		11.7258	-0.00044		11.3146	0.00122
11.7296	-0.00116		11.7301	-0.00054		11.734	-0.00041		11.3228	0.002498
11.7378	-0.00081		11.7383	-0.00055		11.7422	-0.0004		11.3309	0.002343
11.746	-0.00076		11.7464	-0.00055		11.7504	-0.00039		11.3391	0.002187
11.7542	-0.0007		11.7546	-0.00056		11.7586	-0.00039		11.3473	-0.00359
11.7624	-0.00066		11.7628	-0.00058		11.7668	-0.00037		11.3555	-0.00641
11.7706	-0.00064		11.771	-0.0006		11.775	-0.0003		11.3637	-0.0059
11.7788	-0.00066		11.7792	-0.0006		11.7832	0.000983		11.3719	-0.00518
11.7869	-0.00068		11.7874	-0.0006		11.7913	0.001656		11.3801	-0.00341
11.7951	-0.00069		11.7956	-0.0006		11.7995	0.001274		11.3883	-0.00019
11.8033	-0.0007		11.8038	-0.0006		11.8077	0.000891		11.3965	-0.00027
11.8115	-0.0009		11.812	-0.00063		11.8159	5.92e-05		11.4047	-0.00035
11.8197	-0.0008		11.8202	-0.0006		11.8241	7.92e-05		11.4128	-0.00122
11.8279	-0.00075		11.8284	-0.00057		11.8323	4.05e-05		11.421	-0.00535
11.8361	-0.00078		11.8365	-0.00057		11.8405	1.86e-06		11.4292	-0.01052
11.8443	-0.00081		11.8447	-0.00057		11.8487	-8e-05		11.4374	-0.0139
11.8525	-0.00103		11.8529	-0.00057		11.8569	-0.0004		11.4456	-0.0135
11.8607	-0.00103		11.8611	-0.00055		11.8651	-0.00036		11.4538	-0.00913
11.8689	-0.00103		11.8693	-0.00053		11.8733	-0.00031		11.462	-0.00754
11.877	-0.00104		11.8775	-0.00052		11.8814	-0.00027		11.4702	-0.00733
11.8852	-0.00104		11.8857	-0.0005		11.8896	-0.00026		11.4784	-0.00826
11.8934	-0.00077		11.8939	-0.00049		11.8978	-0.00026		11.4865	-0.0092
11.9016	-0.00071		11.9021	-0.00049		11.906	-0.00026		11.4947	-0.00932
11.9098	-0.00068		11.9102	-0.00049		11.9142	-0.00026		11.5029	-0.0074
11.918	-0.0007		11.9184	-0.00049		11.9224	-0.0003		11.5111	-0.00492
11.9262	-0.00072		11.9266	-0.00049		11.9306	-0.00039		11.5193	-0.00164
11.9344	-0.00076		11.9348	-0.00049		11.9388	0.000421		11.5275	-0.00167
11.9426	-0.00086		11.943	-0.00055		11.947	0.000633		11.5357	-0.00169
11.9507	-0.00089		11.9512	-0.0006		11.9551	0.00064		11.5439	-0.00238
11.9589	-0.00078		11.9594	-0.00063		11.9633	0.000639		11.5521	-0.0025
11.9671	-0.00076		11.9676	-0.00055		11.9715	0.000637		11.5603	-0.00262
11.9753	-0.00075		11.9758	-0.00056		11.9797	-0.0001		11.5685	-0.00424
11.9835	-0.00076		11.984	-0.00056		11.9879	-0.00032		11.5766	-0.002
11.9917	-0.00077		11.9922	-0.00058		11.9961	-0.00036		11.5848	-0.00139
11.9999	-0.00108		12.0003	-0.00062		12.0043	-0.00035		11.593	-0.00143
12.0081	-0.00107		12.0085	-0.00066		12.0125	-0.00035		11.6012	-0.00147
12.0163	-0.00106		12.0167	-0.00069		12.0207	-0.00036		11.6094	-0.0032
12.0244	-0.00103		12.0249	-0.0007		12.0289	-0.00037		11.6176	-0.00246
12.0326	-0.00093		12.0331	-0.00066		12.0371	-0.00042		11.6258	-0.00212
12.0408	-0.00092		12.0413	-0.00063		12.0452	-0.00048		11.634	-0.00404
12.049	-0.00075		12.0495	-0.00063		12.0534	-0.00047		11.6422	-0.00595
12.0572	-0.00075		12.0577	-0.00063		12.0616	-0.00047		11.6503	-0.00851
12.0654	-0.00076		12.0659	-0.00063		12.0698	-0.00048		11.6585	-0.00871
12.0736	-0.00077		12.074	-0.00064		12.078	-0.00048		11.6667	-0.00933
12.0818	-0.00083		12.0822	-0.00065		12.0862	-0.00026		11.6749	-0.01234
12.09	-0.00088		12.0904	-0.00069		12.0944	-0.00024		11.6831	-0.01566
12.0982	-0.00089		12.0986	-0.00059		12.1026	-0.00026		11.6913	-0.01502
12.1064	-0.00089		12.1068	-0.00058		12.1107	-0.00027		11.6995	-0.0121
12.1145	-0.00091		12.115	-0.00058		12.1189	-0.00031		11.7077	-0.01022
12.1227	-0.00105		12.1232	-0.00059		12.1271	-0.00031		11.7159	-0.00533
12.1309	-0.00115		12.1314	-0.00059		12.1353	-0.00049		11.7241	-0.00496
12.1391	-0.00094		12.1396	-0.00059		12.1435	-0.00019		11.7323	-0.00541
12.1473	-0.00087		12.1478	-0.00063		12.1517	-0.00012		11.7404	-0.00585
12.1555	-0.00086		12.1559	-0.00065		12.1599	-0.00016		11.7486	-0.00663
12.1637	-0.00086		12.1641	-0.0006		12.1681	-0.0002		11.7568	-0.00693
12.1719	-0.00086		12.1723	-0.00058		12.1763	-0.00028		11.765	-0.00722
12.1801	-0.00087		12.1805	-0.00058		12.1845	-0.00029		11.7732	-0.00879
12.1883	-0.00087		12.1887	-0.00059		12.1927	-0.00029		11.7814	-0.00793
12.1964	-0.00089		12.1969	-0.0006		12.2008	-0.00036		11.7896	-0.00325
12.2046	-0.00094		12.2051	-0.00063		12.209	-0.00051		11.7978	-0.0029
12.2128	-0.00092		12.2133	-0.00059		12.2172	-0.00054		11.8059	-0.00295
12.221	-0.00092		12.2215	-0.00055		12.2254	-0.00042		11.8141	-0.003
12.2292	-0.00093		12.2296	-0.00052		12.2336	-0.00042		11.8223	-0.00082
12.2374	-0.00093		12.2378	-0.00052		12.2418	-0.00042		11.8305	0.001567
12.2456	-0.00102		12.246	-0.00052		12.25	-0.00042		11.8387	0.001572
12.2538	-0.00081		12.2542	-0.00052		12.2582	-0.00044		11.8469	0.001551
12.262	-0.00051		12.2624	-0.00052		12.2664	-0.00049		11.8551	0.001529
12.2701	-0.00045		12.2706	-0.00051		12.2745	-0.00053		11.8633	-0.00012
12.2783	-0.00042		12.2788	-0.00051		12.2827	-0.00058		11.8715	-0.00472
12.2865	-0.00042		12.287	-0.00052		12.2909	-0.00052		11.8797	-0.00677
12.2947	-0.00051		12.2952	-0.00052		12.2991	-0.00049		11.8879	-0.00675
12.3029	-0.00061		12.3034	-0.00053		12.3073	-0.00049		11.896	-0.00711
12.3111	-0.00096		12.3116	-0.00054		12.3155	-0.00048		11.9042	-0.00747
12.3193	-0.00083		12.3197	-0.00055		12.3237	-0.00047		11.9124	-0.01017
12.3275	-0.00076		12.3279	-0.00056		12.3319	-0.00047		11.9206	-0.01008
12.3357	-0.00073		12.3361	-0.00058		12.3401	-0.00047		11.9288	-0.00555
12.3439	-0.00083		12.3443	-0.00068		12.3483	-0.0003		11.937	-0.00267
12.3521	-0.00093		12.3525	-0.00064		12.3565	0.000488		11.9452	-0.00265
12.3602	-0.00103		12.3607	-0.00063		12.3646	0.000632		11.9534	-0.00297
12.3684	-0.00088		12.3689	-0.00062		12.3728	0.000691		11.9616	-0.0033
12.3766	-0.00081		12.3771	-0.00065		12.381	0.000251		11.9697	-0.00644
12.3848	-0.0008		12.3853	-0.00068		12.3892	-0.00019		11.9779	-0.00708
12.393	-0.0008		12.3934	-0.00072		12.3974	-0.0002		11.9861	-0.00721
12.4012	-0.0008		12.4016	-0.00069		12.4056	-0.00011		11.9943	-0.00734
12.4094	-0.00079		12.4098	-0.00068		12.4138	-5.2e-05		12.0025	-0.00537
12.4176	-0.00079		12.418	-0.00067		12.422	-7.3e-05		12.0107	-0.00216
12.4258	-0.0008		12.4262	-0.00061		12.4302	-9.4e-05		12.0189	-0.0009
12.4339	-0.00081		12.4344	-0.00059		12.4383	-0.00015		12.0271	-0.00029
12.4421	-0.00112		12.4426	-0.00059		12.4465	-0.00035		12.0353	0.000236
12.4503	-0.00117		12.4508	-0.00058		12.4547	-0.00044		12.0435	0.000262
12.4585	-0.0011		12.459	-0.00059		12.4629	-0.00041		12.0517	-0.00188
12.4667	-0.00107		12.4672	-0.00059		12.4711	-0.00025		12.0598	-0.00402
12.4749	-0.00105		12.4753	-0.0006		12.4793	0.000273		12.068	-0.00635
12.4831	-0.00083		12.4835	-0.00051		12.4875	0.000443		12.0762	-0.00678
12.4913	-0.00083		12.4917	-0.00051		12.4957	0.000516		12.0844	-0.007
12.4995	-0.00083		12.4999	-0.0005		12.5039	0.00052		12.0926	-0.00706
12.5076	-0.00084		12.5081	-0.00052		12.5121	0.000518		12.1008	-0.00713
12.5158	-0.00088		12.5163	-0.00054		12.5202	0.000517		12.109	-0.00732
12.524	-0.00096		12.5245	-0.00057		12.5284	0.000158		12.1172	-0.00508
12.5322	-0.00097		12.5327	-0.00064		12.5366	-0.0002		12.1253	-0.00114
12.5404	-0.00097		12.5409	-0.0006		12.5448	-0.00038		12.1335	-0.00156
12.5486	-0.00093		12.549	-0.00059		12.553	0.000154		12.1417	-0.00198
12.5568	-0.00095		12.5572	-0.00058		12.5612	0.000719		12.1499	-0.00317
12.565	-0.00096		12.5654	-0.00058		12.5694	0.000918		12.1581	-0.00474
12.5732	-0.00099		12.5736	-0.00053		12.5776	0.00071		12.1663	-0.00477
12.5814	-0.00081		12.5818	-0.00053		12.5858	0.000502		12.1745	-0.0048
12.5895	-0.00078		12.59	-0.00053		12.5939	-0.00052		12.1827	-0.00711
12.5977	-0.00076		12.5982	-0.00056		12.6021	-0.00053		12.1909	-0.00645
12.6059	-0.00071		12.6064	-0.0006		12.6103	-0.00046		12.1991	-0.00471
12.6141	-0.00071		12.6146	-0.00055		12.6185	-0.0004		12.2073	-0.00439
12.6223	-0.00073		12.6228	-0.00049		12.6267	-0.00039		12.2154	-0.00758
12.6305	-0.00075		12.631	-0.00049		12.6349	-0.00038		12.2236	-0.01077
12.6387	-0.00079		12.6391	-0.00049		12.6431	-0.0004		12.2318	-0.01012
12.6469	-0.00098		12.6473	-0.00049		12.6513	-0.00041		12.24	-0.00503
12.6551	-0.00105		12.6555	-0.00052		12.6595	-0.00058		12.2482	-0.00312
12.6633	-0.001		12.6637	-0.00059		12.6677	-0.00065		12.2564	-0.00171
12.6715	-0.0008		12.6719	-0.00059		12.6759	-0.00062		12.2646	0.002216
12.6796	-0.00076		12.6801	-0.00059		12.684	-0.0006		12.2728	0.001271
12.6878	-0.00075		12.6883	-0.00061		12.6922	-0.0006		12.281	0.000327
12.696	-0.00075		12.6965	-0.00063		12.7004	-0.00023		12.2891	-0.00222
12.7042	-0.00084		12.7047	-0.00065		12.7086	-0.0002		12.2973	-0.0073
12.7124	-0.00093		12.7128	-0.00064		12.7168	-0.0002		12.3055	-0.00636
12.7206	-0.00099		12.721	-0.00059		12.725	-0.00022		12.3137	-0.00539
12.7288	-0.0009		12.7292	-0.00054		12.7332	-0.00025		12.3219	-0.00496
12.737	-0.00089		12.7374	-0.00052		12.7414	-0.00025		12.3301	-0.00452
12.7452	-0.00089		12.7456	-0.00051		12.7496	-0.00025		12.3383	-0.00371
12.7533	-0.00091		12.7538	-0.0005		12.7577	-0.00032		12.3465	-0.00374
12.7615	-0.00092		12.762	-0.0005		12.7659	-0.00048		12.3547	-0.00378
12.7697	-0.00099		12.7702	-0.0005		12.7741	-0.00043		12.3629	-0.00397
12.7779	-0.001		12.7784	-0.00051		12.7823	-0.00038		12.3711	-0.0071
12.7861	-0.001		12.7866	-0.00055		12.7905	-0.00027		12.3792	-0.00779
12.7943	-0.00102		12.7948	-0.0005		12.7987	4e-05		12.3874	-0.00884
12.8025	-0.00102		12.8029	-0.00051		12.8069	0.00039		12.3956	-0.00989
12.8107	-0.00102		12.8111	-0.00051		12.8151	0.002543		12.4038	-0.01431
12.8189	-0.00092		12.8193	-0.00054		12.8233	0.00225		12.412	-0.01709
12.827	-0.00082		12.8275	-0.00058		12.8315	0.001957		12.4202	-0.01581
12.8352	-0.00077		12.8357	-0.00069		12.8397	0.001252		12.4284	-0.01142
12.8434	-0.00078		12.8439	-0.00061		12.8478	-0.00018		12.4366	-0.01075
12.8516	-0.00078		12.8521	-0.00058		12.856	-0.00032		12.4448	-0.01052
12.8598	-0.0008		12.8603	-0.00057		12.8642	-0.00051		12.4529	-0.01043
12.868	-0.00088		12.8684	-0.00059		12.8724	-0.00049		12.4611	-0.01034
12.8762	-0.00108		12.8766	-0.00061		12.8806	-0.00047		12.4693	-0.00703
12.8844	-0.00108		12.8848	-0.00066		12.8888	-0.00044		12.4775	-0.00361
12.8926	-0.00092		12.893	-0.0006		12.897	-0.00041		12.4857	-0.00372
12.9008	-0.00091		12.9012	-0.00054		12.9052	-0.00041		12.4939	-0.00382
12.909	-0.00089		12.9094	-0.00052		12.9133	-0.00041		12.5021	-0.00409
12.9171	-0.00088		12.9176	-0.00052		12.9215	-0.00041		12.5103	-0.0037
12.9253	-0.00087		12.9258	-0.00053		12.9297	-0.00045		12.5185	-0.00357
12.9335	-0.00087		12.934	-0.00053		12.9379	-0.00047		12.5267	-0.00375
12.9417	-0.00088		12.9422	-0.00055		12.9461	-0.00049		12.5348	-0.00393
12.9499	-0.00091		12.9504	-0.00041		12.9543	-0.00049		12.543	-0.00641
12.9581	-0.00112		12.9585	0.00172		12.9625	-0.0005		12.5512	-0.01146
12.9663	-0.00105		12.9667	0.00282		12.9707	-0.00051		12.5594	-0.01299
12.9745	-0.00101		12.9749	0.002814		12.9789	-0.00054		12.5676	-0.0081
12.9827	-0.00097		12.9831	0.002809		12.9871	-0.00054		12.5758	-0.00786
12.9909	-0.00096		12.9913	0.00273		12.9953	-0.00053		12.584	-0.00825
12.999	-0.00096		12.9995	0.000633		13.0034	-0.00053		12.5922	-0.00865
13.0072	-0.00096		13.0077	-0.00018		13.0116	-0.00051		12.6004	-0.00817
13.0154	-0.00096		13.0159	-0.00023		13.0198	-0.00048		12.6085	-0.00807
13.0236	-0.00096		13.0241	-0.00047		13.028	-0.00048		12.6167	-0.00931
13.0318	-0.00096		13.0322	-0.00052		13.0362	-0.00049		12.6249	-0.01054
13.04	-0.00095		13.0404	-0.00058		13.0444	-0.00049		12.6331	-0.00867
13.0482	-0.00094		13.0486	-0.00074		13.0526	-0.0005		12.6413	-0.00828
13.0564	-0.00094		13.0568	-0.00066		13.0608	-0.00051		12.6495	-0.00788
13.0646	-0.00094		13.065	-0.00064		13.069	-0.00052		12.6577	-0.00555
13.0727	-0.00097		13.0732	-0.00063		13.0771	-0.00055		12.6659	-0.00479
13.0809	-0.00102		13.0814	-0.00063		13.0853	-0.00047		12.6741	-0.00465
13.0891	-0.00113		13.0896	-0.00056		13.0935	0.000524		12.6823	-0.00593
13.0973	-0.00111		13.0978	-0.00055		13.1017	0.000494		12.6905	-0.00722
13.1055	-0.00103		13.106	-0.00054		13.1099	0.000465		12.6986	-0.00685
13.1137	-0.00102		13.1142	-0.00053		13.1181	0.000341		12.7068	-0.00469
13.1219	-0.00107		13.1223	-0.00052		13.1263	-0.0003		12.715	-0.00365
13.1301	-0.00112		13.1305	-0.00048		13.1345	-0.0001		12.7232	-0.00437
13.1383	-0.00121		13.1387	-0.00048		13.1427	0.000979		12.7314	-0.00509
13.1465	-0.00124		13.1469	-0.00047		13.1509	0.00091		12.7396	-0.00556
13.1546	-0.00088		13.1551	-0.00047		13.1591	0.000841		12.7478	-0.00924
13.1628	-0.00081		13.1633	-0.00047		13.1672	0.000641		12.756	-0.01251
13.171	-0.00074		13.1715	-0.00047		13.1754	-0.00053		12.7642	-0.00937
13.1792	-0.00051		13.1797	-0.00047		13.1836	-0.0006		12.7723	-0.00851
13.1874	-0.0004		13.1879	-0.00047		13.1918	-0.00062		12.7805	-0.00765
13.1956	-0.00038		13.196	-0.00053		13.2	-0.00025		12.7887	-0.00678
13.2038	-0.00038		13.2042	-0.00067		13.2082	-0.00023		12.7969	-0.00632
13.212	-0.00069		13.2124	-0.00066		13.2164	-0.00022		12.8051	-0.00612
13.2202	-0.00101		13.2206	-0.00066		13.2246	-0.00021		12.8133	-0.00592
13.2284	-0.00127		13.2288	-0.00067		13.2327	-0.0002		12.8215	-0.00615
13.2365	-0.00106		13.237	-0.00068		13.2409	-0.00023		12.8297	-0.00637
13.2447	-0.00095		13.2452	-0.00078		13.2491	-0.00027		12.8379	-0.00832
13.2529	-0.00093		13.2534	-0.00058		13.2573	-0.00033		12.8461	-0.01165
13.2611	-0.00092		13.2616	-0.00056		13.2655	-0.00035		12.8543	-0.00987
13.2693	-0.00084		13.2698	-0.00056		13.2737	-0.00042		12.8624	-0.00589
13.2775	-0.0008		13.2779	-0.00056		13.2819	-0.00048		12.8706	-0.00661
13.2857	-0.0008		13.2861	-0.00057		13.2901	-0.00046		12.8788	-0.00733
13.2939	-0.00082		13.2943	-0.00058		13.2983	-0.00023		12.887	-0.00922
13.3021	-0.00084		13.3025	-0.00059		13.3065	-0.00025		12.8952	-0.01214
13.3102	-0.00088		13.3107	-0.00061		13.3147	-0.00028		12.9034	-0.01132
13.3184	-0.0009		13.3189	-0.00071		13.3228	-0.00038		12.9116	-0.00914
13.3266	-0.00091		13.3271	-0.00071		13.331	-0.00059		12.9198	-0.00704
13.3348	-0.00096		13.3353	-0.00066		13.3392	-0.00057		12.9279	-0.00632
13.343	-0.00102		13.3435	-0.00064		13.3474	-0.00057		12.9361	-0.00538
13.3512	-0.00107		13.3516	-0.00062		13.3556	-0.00057		12.9443	-0.00375
13.3594	-0.00104		13.3598	-0.00062		13.3638	-0.00058		12.9525	-0.00296
13.3676	-0.00094		13.368	-0.00062		13.372	-0.00059		12.9607	-0.00334
13.3758	-0.00083		13.3762	-0.00063		13.3802	-0.00047		12.9689	-0.00372
13.384	-0.00082		13.3844	-0.00066		13.3884	-0.00042		12.9771	-0.00346
13.3922	-0.00084		13.3926	-0.00066		13.3965	-0.00037		12.9853	-0.00142
13.4003	-0.00085		13.4008	-0.00064		13.4047	-0.00035		12.9935	-0.00109
13.4085	-0.00094		13.409	-0.00063		13.4129	-0.00034		13.0017	-0.00106
13.4167	-0.00114		13.4172	-0.00062		13.4211	-0.00033		13.0099	-0.00154
13.4249	-0.00113		13.4254	-0.00061		13.4293	0.00053		13.018	-0.00201
13.4331	-0.00101		13.4336	-0.00055		13.4375	0.001482		13.0262	-0.00225
13.4413	-0.001		13.4417	-0.00052		13.4457	0.001117		13.0344	-0.0025
13.4495	-0.001		13.4499	-0.00052		13.4539	0.000752		13.0426	-0.00584
13.4577	-0.001		13.4581	-0.00051		13.4621	-0.00014		13.0508	-0.00763
13.4659	-0.00096		13.4663	-0.0005		13.4703	-0.00032		13.059	-0.00872
13.4741	-0.00095		13.4745	-0.0005		13.4785	-0.00051		13.0672	-0.01082
13.4822	-0.00093		13.4827	-0.00051		13.4866	-0.00067		13.0754	-0.01125
13.4904	-0.00092		13.4909	-0.00051		13.4948	-0.00058		13.0836	-0.00925
13.4986	-0.00092		13.4991	-0.0006		13.503	-0.00056		13.0917	-0.00762
13.5068	-0.00092		13.5073	-0.00058		13.5112	-0.00054		13.0999	-0.00758
13.515	-0.00092		13.5154	-0.00054		13.5194	-0.00044		13.1081	-0.00686
13.5232	-0.00093		13.5236	-0.00054		13.5276	9.63e-05		13.1163	-0.00508
13.5314	-0.00094		13.5318	-0.00054		13.5358	9.29e-05		13.1245	-0.00445
13.5396	-0.00097		13.54	-0.00054		13.544	8.94e-05		13.1327	-0.00419
13.5478	-0.00098		13.5482	-0.00057		13.5522	8.22e-05		13.1409	-0.00502
13.5559	-0.00098		13.5564	-0.00058		13.5603	-0.00058		13.1491	-0.00586
13.5641	-0.00099		13.5646	-0.00058		13.5685	-0.00056		13.1573	-0.00763
13.5723	-0.00098		13.5728	-0.00063		13.5767	-0.00053		13.1655	-0.00652
13.5805	-0.00098		13.581	-0.00061		13.5849	-0.00052		13.1737	-0.00121
13.5887	-0.00098		13.5892	-0.00061		13.5931	-0.00052		13.1818	0.000686
13.5969	-0.00099		13.5974	-0.00061		13.6013	-0.00052		13.19	0.000954
13.6051	-0.0011		13.6055	-0.00061		13.6095	-0.00052		13.1982	-8e-05
13.6133	-0.00107		13.6137	-0.00047		13.6177	-0.00067		13.2064	-0.00111
13.6215	-0.00105		13.6219	-0.00042		13.6259	-0.00076		13.2146	-0.00064
13.6296	-0.00105		13.6301	-0.0004		13.6341	-0.00058		13.2228	-0.00051
13.6378	-0.00105		13.6383	-0.00042		13.6422	-0.00053		13.231	-0.00037
13.646	-0.00106		13.6465	-0.00043		13.6504	-0.00051		13.2392	0.000831
13.6542	-0.00108		13.6547	-0.00048		13.6586	-0.00051		13.2474	-0.00034
13.6624	-0.00101		13.6629	-0.00058		13.6668	-0.00051		13.2555	-0.00151
13.6706	-0.00088		13.671	-0.00056		13.675	-0.00051		13.2637	-0.00404
13.6788	-0.00088		13.6792	-0.00055		13.6832	-0.00051		13.2719	-0.00839
13.687	-0.00088		13.6874	-0.00055		13.6914	-0.00051		13.2801	-0.00746
13.6952	-0.00089		13.6956	-0.00055		13.6996	-0.00052		13.2883	-0.00679
13.7034	-0.0009		13.7038	-0.00056		13.7078	-0.00048		13.2965	-0.00661
13.7116	-0.00092		13.712	-0.00056		13.7159	-0.00048		13.3047	-0.00644
13.7197	-0.001		13.7202	-0.00057		13.7241	-0.00049		13.3129	-0.00633
13.7279	-0.00094		13.7284	-0.00056		13.7323	-0.0005		13.3211	-0.00572
13.7361	-0.00088		13.7366	-0.00054		13.7405	-0.00052		13.3293	-0.00556
13.7443	-0.00084		13.7448	-0.00054		13.7487	-0.00052		13.3374	-0.00479
13.7525	-0.00084		13.753	-0.00054		13.7569	-0.00052		13.3456	-0.00475
13.7607	-0.00084		13.7611	-0.00054		13.7651	-0.00052		13.3538	-0.00584
13.7689	-0.00086		13.7693	-0.00055		13.7733	-0.00047		13.362	-0.00693
13.7771	-0.00087		13.7775	-0.00055		13.7815	-0.00045		13.3702	-0.01109
13.7853	-0.00103		13.7857	-0.00055		13.7897	-0.00044		13.3784	-0.01293
13.7934	-0.00098		13.7939	-0.00055		13.7979	-0.00045		13.3866	-0.0137
13.8016	-0.00097		13.8021	-0.00056		13.806	-0.00045		13.3948	-0.01118
13.8098	-0.00097		13.8103	-0.00057		13.8142	-0.00041		13.403	-0.0057
13.818	-0.00094		13.8185	-0.00054		13.8224	-0.00039		13.4111	-0.00217
13.8262	-0.00093		13.8267	-0.0005		13.8306	-0.00043		13.4193	-0.00204
13.8344	-0.00093		13.8348	-0.0005		13.8388	-0.00047		13.4275	-0.00191
13.8426	-0.00094		13.843	-0.00049		13.847	-0.00055		13.4357	-0.00174
13.8508	-0.00111		13.8512	-0.0005		13.8552	-0.00053		13.4439	-0.0017
13.859	-0.0012		13.8594	-0.0005		13.8634	-0.00053		13.4521	-0.00251
13.8672	-0.00118		13.8676	-0.00055		13.8716	-0.00053		13.4603	-0.00332
13.8753	-0.00098		13.8758	-0.00056		13.8797	-0.00053		13.4685	-0.0047
13.8835	-0.00092		13.884	-0.00056		13.8879	-0.00054		13.4767	-0.00484
13.8917	-0.00091		13.8922	-0.00058		13.8961	-0.0006		13.4849	-0.00498
13.8999	-0.0009		13.9004	-0.00061		13.9043	-0.0006		13.4931	-0.00677
13.9081	-0.00091		13.9086	-0.00058		13.9125	-0.00059		13.5012	-0.0092
13.9163	-0.00091		13.9168	-0.00058		13.9207	-0.00059		13.5094	-0.00699
13.9245	-0.00093		13.9249	-0.00058		13.9289	-0.00059		13.5176	-0.00536
13.9327	-0.00097		13.9331	-0.00051		13.9371	-0.00059		13.5258	-0.00525
13.9409	-0.0007		13.9413	-0.00051		13.9453	-0.00057		13.534	-0.00491
13.949	-0.0007		13.9495	-0.00051		13.9535	-0.00057		13.5422	-0.00476
13.9572	-0.00076		13.9577	-0.00052		13.9617	-0.00057		13.5504	-0.00558
13.9654	-0.00081		13.9659	-0.00053		13.9698	-0.00057		13.5586	-0.00641
13.9736	-0.00107		13.9741	-0.00054		13.978	-0.00049		13.5668	-0.00429
13.9818	-0.00112		13.9823	-0.00058		13.9862	-0.00041		13.5749	-0.00195
13.99	-0.00105		13.9905	-0.00067		13.9944	-0.00037		13.5831	-0.0008
13.9982	-0.00103		13.9986	-0.00064		14.0026	-0.00035		13.5913	-0.00124
14.0064	-0.00102		14.0068	-0.00062		14.0108	-0.00035		13.5995	-0.00167
14.0146	-0.00098		14.015	-0.00061		14.019	-0.00035		13.6077	-0.00208
14.0228	-0.00097		14.0232	-0.00058		14.0272	-0.00028		13.6159	-0.00301
14.031	-0.00097		14.0314	-0.00057		14.0353	1.73e-05		13.6241	-0.00405
14.0391	-0.00081		14.0396	-0.00058		14.0435	0.000117		13.6323	-0.00346
14.0473	-0.00076		14.0478	-0.0006		14.0517	4.88e-05		13.6405	-0.00177
14.0555	-0.00077		14.056	-0.00062		14.0599	-2e-05		13.6486	0.000261
14.0637	-0.00078		14.0642	-0.00065		14.0681	-0.00021		13.6568	-0.00044
14.0719	-0.00082		14.0724	-0.00068		14.0763	-0.00022		13.665	-0.00114
14.0801	-0.0009		14.0805	-0.00067		14.0845	-0.00022		13.6732	-0.00318
14.0883	-0.00075		14.0887	-0.00065		14.0927	-0.00035		13.6814	-0.00862
14.0965	-0.00074		14.0969	-0.00062		14.1009	-0.00043		13.6896	-0.00993
14.1047	-0.00078		14.1051	-0.00059		14.1091	-0.00046		13.6978	-0.00901
14.1128	-0.00082		14.1133	-0.00057		14.1173	-0.00047		13.706	-0.0088
14.121	-0.00089		14.1215	-0.00056		14.1254	-0.00047		13.7142	-0.00859
14.1292	-0.00111		14.1297	-0.00055		14.1336	-0.0005		13.7224	-0.00861
14.1374	-0.00113		14.1379	-0.00055		14.1418	-0.00051		13.7305	-0.00864
14.1456	-0.00115		14.1461	-0.00051		14.15	-0.00052		13.7387	-0.00883
14.1538	-0.00119		14.1542	-0.00052		14.1582	-0.0006		13.7469	-0.00888
14.162	-0.00126		14.1624	-0.00053		14.1664	-0.00054		13.7551	-0.0056
14.1702	-0.00109		14.1706	-0.00056		14.1746	-0.00054		13.7633	-0.00245
14.1784	-0.00079		14.1788	-0.00057		14.1828	-0.00053		13.7715	-0.00127
14.1866	0.001009		14.187	-0.00057		14.191	-0.00053		13.7797	-0.001
14.1948	0.000923		14.1952	-0.0006		14.1991	-0.00044		13.7879	-0.00074
14.2029	0.000837		14.2034	-0.00059		14.2073	-0.00044		13.7961	-0.00014
14.2111	0.000587		14.2116	-0.00058		14.2155	-0.00044		13.8043	0.000117
14.2193	-0.00068		14.2198	-0.00059		14.2237	-0.00044		13.8125	0.000136
14.2275	-0.00086		14.228	-0.00059		14.2319	-0.00046		13.8206	0.000154
14.2357	-0.00095		14.2362	-0.00059		14.2401	-0.00055		13.8288	0.001527
14.2439	-0.00099		14.2443	-0.00061		14.2483	-0.00052		13.837	0.001971
14.2521	-0.00102		14.2525	-0.00064		14.2565	-0.0005		13.8452	-0.00034
14.2603	-0.00114		14.2607	-0.00064		14.2647	-0.00049		13.8534	-0.00266
14.2685	-0.00123		14.2689	-0.00064		14.2729	-0.00025		13.8616	-0.004
14.2767	-0.00111		14.2771	-0.00064		14.2811	-0.00026		13.8698	-0.00417
14.2848	-0.00104		14.2853	-0.00064		14.2892	-0.00028		13.878	-0.00435
14.293	-0.001		14.2935	-0.00066		14.2974	-0.00038		13.8862	-0.00612
14.3012	-0.00102		14.3017	-0.00068		14.3056	-0.00061		13.8943	-0.00421
14.3094	-0.00104		14.3099	-0.00065		14.3138	-0.00041		13.9025	-0.00161
14.3176	-0.00108		14.318	-0.00065		14.322	0.000614		13.9107	-0.00092
14.3258	-0.00118		14.3262	-0.00065		14.3302	0.000786		13.9189	-0.00396
14.334	-0.00112		14.3344	-0.00065		14.3384	0.000803		13.9271	-0.007
14.3422	-0.00103		14.3426	-0.00066		14.3466	0.00027		13.9353	-0.01159
14.3504	-0.00102		14.3508	-0.00067		14.3548	-0.00026		13.9435	-0.01247
14.3585	-0.00103		14.359	-0.00073		14.3629	-0.00041		13.9517	-0.01004
14.3667	-0.00105		14.3672	-0.00069		14.3711	-0.00042		13.9599	-0.00985
14.3749	-0.0013		14.3754	-0.00065		14.3793	-0.00026		13.9681	-0.01007
14.3831	-0.00082		14.3836	-0.00063		14.3875	-0.00015		13.9763	-0.01029
14.3913	-0.00081		14.3918	-0.00064		14.3957	-4.7e-05		13.9844	-0.01091
14.3995	-0.00081		14.3999	-0.00064		14.4039	0.000325		13.9926	-0.00986
14.4077	-0.00079		14.4081	-0.00069		14.4121	0.000312		14.0008	-0.00844
14.4159	-0.00081		14.4163	-0.00067		14.4203	0.0003		14.009	-0.00844
14.4241	-0.00082		14.4245	-0.00063		14.4285	0.000259		14.0172	-0.00843
14.4322	-0.00085		14.4327	-0.00061		14.4367	-0.00039		14.0254	-0.00811
14.4404	-0.00099		14.4409	-0.00059		14.4448	-0.00056		14.0336	-0.00577
14.4486	-0.0011		14.4491	-0.00055		14.453	-0.00054		14.0418	-0.00551
14.4568	-0.00098		14.4573	-0.00053		14.4612	-0.00034		14.05	-0.00524
14.465	-0.00075		14.4655	-0.00052		14.4694	-0.00025		14.0581	-0.00454
14.4732	-0.00064		14.4736	-0.00054		14.4776	-0.00031		14.0663	-0.00456
14.4814	-0.00059		14.4818	-0.00057		14.4858	-0.00036		14.0745	-0.00459
14.4896	-0.00058		14.49	-0.00054		14.494	-0.00047		14.0827	-0.01131
14.4978	-0.00068		14.4982	-0.00049		14.5022	-0.00048		14.0909	-0.01462
14.506	-0.00078		14.5064	-0.00046		14.5104	-0.00049		14.0991	-0.01185
14.5142	-0.00098		14.5146	-0.00049		14.5185	-0.00059		14.1073	-0.01138
14.5223	-0.00103		14.5228	-0.00052		14.5267	-0.00054		14.1155	-0.01148
14.5305	-0.00093		14.531	-0.00058		14.5349	-0.00042		14.1237	-0.01158
14.5387	-0.00088		14.5392	-0.00073		14.5431	-0.00042		14.1319	-0.01121
14.5469	-0.00088		14.5474	-0.00068		14.5513	-0.00043		14.14	-0.00758
14.5551	-0.00089		14.5556	-0.00068		14.5595	-0.00043		14.1482	-0.00545
14.5633	-0.00092		14.5637	-0.00068		14.5677	-0.00044		14.1564	-0.00524
14.5715	-0.00082		14.5719	-0.00068		14.5759	-0.00048		14.1646	-0.00659
14.5797	-0.00082		14.5801	-0.0007		14.5841	-0.00041		14.1728	-0.00793
14.5879	-0.00081		14.5883	-0.00076		14.5923	-0.00041		14.181	-0.00708
14.596	-0.00088		14.5965	-0.00073		14.6005	-0.0004		14.1892	-0.00537
14.6042	-0.00095		14.6047	-0.00069		14.6086	-0.0004		14.1974	-0.00503
14.6124	-0.0008		14.6129	-0.00069		14.6168	-0.0004		14.2056	-0.0049
14.6206	-0.00081		14.6211	-0.00068		14.625	-0.00041		14.2137	-0.00476
14.6288	-0.00082		14.6293	-0.00068		14.6332	-0.00041		14.2219	-0.00314
14.637	-0.00083		14.6374	-0.00067		14.6414	-0.00036		14.2301	-0.00041
14.6452	-0.00093		14.6456	-0.00067		14.6496	-0.00036		14.2383	-0.00103
14.6534	-0.00098		14.6538	-0.00067		14.6578	-0.00036		14.2465	-0.00165
14.6616	-0.00104		14.662	-0.00067		14.666	-0.00039		14.2547	-0.00304
14.6698	-0.00123		14.6702	-0.00067		14.6742	-0.00042		14.2629	-0.00728
14.6779	-0.00123		14.6784	-0.00067		14.6823	-0.00043		14.2711	-0.00819
14.6861	-0.00124		14.6866	-0.00067		14.6905	-0.00045		14.2793	-0.00866
14.6943	-0.00125		14.6948	-0.00067		14.6987	-0.00047		14.2875	-0.01281
14.7025	-0.00127		14.703	-0.00066		14.7069	-0.00053		14.2957	-0.01417
14.7107	-0.0013		14.7112	-0.00066		14.7151	-0.00065		14.3038	-0.01392
14.7189	-0.00132		14.7194	-0.00063		14.7233	-0.00063		14.312	-0.01368
14.7271	-0.00127		14.7275	-0.00063		14.7315	-0.00051		14.3202	-0.01019
14.7353	-0.00102		14.7357	-0.00064		14.7397	-0.00051		14.3284	-0.0091
14.7435	-0.00088		14.7439	-0.00064		14.7479	-0.0005		14.3366	-0.01004
14.7516	-0.00073		14.7521	-0.00065		14.7561	-0.00031		14.3448	-0.01099
14.7598	-0.00066		14.7603	-0.00066		14.7642	-0.00029		14.353	-0.0146
14.768	-0.00066		14.7685	-0.00066		14.7724	-0.00032		14.3612	-0.00991
14.7762	-0.00071		14.7767	-0.00067		14.7806	-0.00035		14.3694	-0.00934
14.7844	-0.00076		14.7849	-0.00071		14.7888	-0.0004		14.3775	-0.00924
14.7926	-0.00087		14.793	-0.00069		14.797	-0.0005		14.3857	-0.00988
14.8008	-0.001		14.8012	-0.00064		14.8052	-0.00032		14.3939	-0.01053
14.809	-0.00102		14.8094	-0.00064		14.8134	-0.00031		14.4021	-0.01246
14.8172	-0.00103		14.8176	-0.00064		14.8216	-0.00028		14.4103	-0.01075
14.8254	-0.00103		14.8258	-0.00064		14.8298	-0.00028		14.4185	-0.00572
14.8336	-0.00105		14.834	-0.00064		14.8379	-0.00028		14.4267	-0.0001
14.8417	-0.00119		14.8422	-0.00065		14.8461	-0.00029		14.4349	-0.00039
14.8499	-0.00114		14.8504	-0.00067		14.8543	-0.00031		14.4431	-0.00068
14.8581	-0.0011		14.8586	-0.00075		14.8625	-0.00057		14.4512	-0.00209
14.8663	-0.0011		14.8668	-0.00074		14.8707	-0.00064		14.4594	-0.00345
14.8745	-0.00109		14.875	-0.00073		14.8789	-0.00044		14.4676	-0.00502
14.8827	-0.00109		14.8831	-0.00072		14.8871	-0.00043		14.4758	-0.00897
14.8909	-0.00109		14.8913	-0.00072		14.8953	-0.00043		14.484	-0.011
14.8991	-0.00109		14.8995	-0.00072		14.9035	-0.00042		14.4922	-0.00903
14.9073	-0.00111		14.9077	-0.00073		14.9117	-0.00042		14.5004	-0.00533
14.9154	-0.00108		14.9159	-0.0007		14.9199	-0.00041		14.5086	-0.00255
14.9236	-0.00107		14.9241	-0.00065		14.928	-0.00041		14.5168	-0.0022
14.9318	-0.00109		14.9323	-0.00059		14.9362	-0.00041		14.525	-0.00247
14.94	-0.0011		14.9405	-0.00056		14.9444	-0.00044		14.5331	-0.00274
14.9482	-0.00117		14.9487	-0.00055		14.9526	-0.00047		14.5413	-0.00515
14.9564	-0.00111		14.9568	-0.00056		14.9608	-0.0005		14.5495	-0.00602
14.9646	-0.00107		14.965	-0.00057		14.969	-0.00052		14.5577	-0.00482
14.9728	-0.00107		14.9732	-0.00059		14.9772	-0.0005		14.5659	-0.0018
14.981	-0.0011		14.9814	-0.00065		14.9854	-0.00047		14.5741	0.00043
14.9892	-0.00113		14.9896	-0.0007		14.9936	-0.00048		14.5823	0.000985
14.9974	-0.00085		14.9978	-0.00076		15.0017	-0.00048		14.5905	-0.00222
15.0055	-0.00075		15.006	-0.00067		15.0099	-0.0005		14.5987	-0.00543
15.0137	-0.00038		15.0142	-0.00058		15.0181	-0.00058		14.6069	-0.00767
15.0219	-0.0003		15.0224	-0.00058		15.0263	-0.00046		14.6151	-0.00841
15.0301	-0.00031		15.0306	-0.00058		15.0345	-0.0003		14.6232	-0.01005
15.0383	-0.00033		15.0388	-0.00058		15.0427	-0.00025		14.6314	-0.01164
15.0465	-0.00037		15.0469	-0.00058		15.0509	-0.0002		14.6396	-0.01189
15.0547	-0.00044		15.0551	-0.00061		15.0591	-0.0002		14.6478	-0.01358
15.0629	-0.00059		15.0633	-0.00064		15.0673	-0.00021		14.656	-0.01435
15.071	-0.0009		15.0715	-0.00071		15.0755	-0.00021		14.6642	-0.01165
15.0792	-0.00099		15.0797	-0.00069		15.0837	-0.00024		14.6724	-0.00945
15.0874	-0.0009		15.0879	-0.00068		15.0918	-0.00026		14.6806	-0.00975
15.0956	-0.0009		15.0961	-0.00067		15.1	-0.00047		14.6888	-0.01005
15.1038	-0.00091		15.1043	-0.00072		15.1082	-0.00052		14.6969	-0.01087
15.112	-0.00091		15.1125	-0.00077		15.1164	-0.00045		14.7051	-0.00766
15.1202	-0.00093		15.1206	-0.00075		15.1246	-0.0003		14.7133	-0.00641
15.1284	-0.00099		15.1288	-0.00063		15.1328	-0.00023		14.7215	-0.00633
15.1366	-0.00088		15.137	-0.00062		15.141	-0.0002		14.7297	-0.00646
15.1448	-0.00078		15.1452	-0.00063		15.1492	-0.00017		14.7379	-0.0066
15.153	-0.00057		15.1534	-0.00063		15.1573	-1.3e-05		14.7461	-0.00887
15.1611	-0.00052		15.1616	-0.00065		15.1655	4.98e-05		14.7543	-0.01176
15.1693	-0.00052		15.1698	-0.00065		15.1737	-1.5e-05		14.7625	-0.0115
15.1775	-0.00053		15.178	-0.00065		15.1819	-8e-05		14.7707	-0.0076
15.1857	-0.00069		15.1862	-0.00065		15.1901	-0.00042		14.7789	-0.00439
15.1939	-0.00071		15.1944	-0.00066		15.1983	-0.00045		14.787	-0.00368
15.2021	-0.00073		15.2025	-0.0007		15.2065	-0.00048		14.7952	-0.00377
15.2103	-0.00083		15.2107	-0.00066		15.2147	-0.00058		14.8034	-0.00387
15.2185	-0.00112		15.2189	-0.00064		15.2229	-0.00041		14.8116	-0.00547
15.2267	-0.00108		15.2271	-0.00063		15.2311	-0.00036		14.8198	-0.0033
15.2348	-0.00107		15.2353	-0.00058		15.2393	-0.00017		14.828	-0.00421
15.243	-0.00106		15.2435	-0.00057		15.2474	-0.00017		14.8362	-0.00513
15.2512	-0.00106		15.2517	-0.00057		15.2556	-0.00019		14.8444	-0.00771
15.2594	-0.00102		15.2599	-0.00058		15.2638	-0.00021		14.8526	-0.01181
15.2676	-0.001		15.2681	-0.00068		15.272	-0.00051		14.8607	-0.01069
15.2758	-0.00099		15.2762	-0.00068		15.2802	-0.00051		14.8689	-0.00959
15.284	-0.00099		15.2844	-0.00068		15.2884	-0.00042		14.8771	-0.00931
15.2922	-0.00094		15.2926	-0.00069		15.2966	-0.00036		14.8853	-0.01056
15.3004	-0.00092		15.3008	-0.00066		15.3048	-0.00035		14.8935	-0.01182
15.3086	-0.00093		15.309	-0.00065		15.313	-0.00034		14.9017	-0.01128
15.3168	-0.00093		15.3172	-0.00063		15.3211	-0.00021		14.9099	-0.00861
15.3249	-0.00096		15.3254	-0.00056		15.3293	-0.00017		14.9181	-0.00755
15.3331	-0.001		15.3336	-0.00056		15.3375	-0.00017		14.9263	-0.00736
15.3413	-0.00102		15.3418	-0.00056		15.3457	-0.00017		14.9345	-0.00717
15.3495	-0.00103		15.35	-0.00056		15.3539	-0.00017		14.9426	-0.00729
15.3577	-0.00115		15.3582	-0.00057		15.3621	-0.00018		14.9508	-0.00741
15.3659	-0.00132		15.3663	-0.00065		15.3703	-0.00026		14.959	-0.00769
15.3741	-0.00123		15.3745	-0.00069		15.3785	-0.00046		14.9672	-0.00951
15.3823	-0.00098		15.3827	-0.0007		15.3867	-0.00045		14.9754	-0.00986
15.3905	-0.00086		15.3909	-0.0007		15.3949	-0.00045		14.9836	-0.00965
15.3986	-0.00084		15.3991	-0.00071		15.4031	-0.00046		14.9918	-0.01039
15.4068	-0.00087		15.4073	-0.00076		15.4112	-0.00046		15	-0.01113
15.415	-0.0009		15.4155	-0.00072		15.4194	-0.00047		15.0082	-0.01445
15.4232	-0.00098		15.4237	-0.0007		15.4276	-0.00049		15.0163	-0.01147
15.4314	-0.0009		15.4319	-0.00072		15.4358	-0.00057		15.0245	-0.00738
15.4396	-0.00081		15.44	-0.00073		15.444	-0.00055		15.0327	-0.00514
15.4478	-0.00073		15.4482	-0.00076		15.4522	-0.00054		15.0409	-0.00472
15.456	-0.00069		15.4564	-0.00076		15.4604	-0.00055		15.0491	-0.00466
15.4642	-0.00066		15.4646	-0.00069		15.4686	-0.00055		15.0573	-0.00643
15.4724	-0.00065		15.4728	-0.00067		15.4768	-0.00056		15.0655	-0.0082
15.4805	-0.00065		15.481	-0.00066		15.4849	-0.00058		15.0737	-0.01326
15.4887	-0.00067		15.4892	-0.00066		15.4931	-0.0006		15.0819	-0.01443
15.4969	-0.00068		15.4974	-0.00068		15.5013	-0.00065		15.0901	-0.01028
15.5051	-0.00072		15.5056	-0.00069		15.5095	-0.0007		15.0983	-0.00844
15.5133	-0.00093		15.5138	-0.00069		15.5177	-0.00069		15.1064	-0.00871
15.5215	-0.00093		15.522	-0.0007		15.5259	-0.00069		15.1146	-0.00898
15.5297	-0.00093		15.5301	-0.0007		15.5341	-0.00069		15.1228	-0.00968
15.5379	-0.00096		15.5383	-0.00072		15.5423	-0.00069		15.131	-0.01136
15.5461	-0.0008		15.5465	-0.00064		15.5505	-0.00072		15.1392	-0.0099
15.5542	-0.0008		15.5547	-0.00064		15.5587	-0.00065		15.1474	-0.00484
15.5624	-0.0008		15.5629	-0.00063		15.5668	-0.00065		15.1556	-0.00416
15.5706	-0.00068		15.5711	-0.00062		15.575	-0.00064		15.1638	-0.00406
15.5788	-0.00068		15.5793	-0.00062		15.5832	-0.00058		15.172	-0.00473
15.587	-0.00069		15.5875	-0.00062		15.5914	-0.00043		15.1801	-0.0054
15.5952	-0.00071		15.5956	-0.00062		15.5996	-0.00037		15.1883	-0.00655
15.6034	-0.00077		15.6038	-0.00071		15.6078	-0.0003		15.1965	-0.00771
15.6116	-0.00081		15.612	-0.00068		15.616	-0.00029		15.2047	-0.00935
15.6198	-0.00085		15.6202	-0.00069		15.6242	-0.00028		15.2129	-0.0057
15.628	-0.00135		15.6284	-0.00069		15.6324	-0.00029		15.2211	-0.00489
15.6362	-0.00121		15.6366	-0.00069		15.6405	-0.00029		15.2293	-0.00407
15.6443	-0.00092		15.6448	-0.00071		15.6487	-0.00031		15.2375	-0.00371
15.6525	-0.00092		15.653	-0.00073		15.6569	0.0005		15.2457	-0.00089
15.6607	-0.00092		15.6612	-0.00078		15.6651	0.000606		15.2538	-0.00162
15.6689	-0.00092		15.6694	-0.00075		15.6733	0.0004		15.262	-0.00235
15.6771	-0.00093		15.6776	-0.00074		15.6815	0.000194		15.2702	-0.00398
15.6853	-0.00095		15.6857	-0.00073		15.6897	-0.00022		15.2784	-0.00731
15.6935	-0.00096		15.6939	-0.00066		15.6979	-0.00041		15.2866	-0.00826
15.7017	-0.00108		15.7021	-0.00066		15.7061	-0.00042		15.2948	-0.00685
15.7099	-0.00101		15.7103	-0.00061		15.7143	-0.00042		15.303	-0.00604
15.718	-0.00071		15.7185	-0.00061		15.7225	-0.00044		15.3112	-0.00578
15.7262	-0.00072		15.7267	-0.00061		15.7306	-0.00057		15.3194	-0.00628
15.7344	-0.00073		15.7349	-0.00061		15.7388	-0.00062		15.3276	-0.00679
15.7426	-0.00076		15.7431	-0.00062		15.747	-0.00067		15.3358	-0.00745
15.7508	-0.00081		15.7513	-0.00065		15.7552	-0.00065		15.3439	-0.00959
15.759	-0.00093		15.7594	-0.00071		15.7634	-0.00064		15.3521	-0.01156
15.7672	-0.00102		15.7676	-0.00067		15.7716	-0.00064		15.3603	-0.00948
15.7754	-0.0011		15.7758	-0.00065		15.7798	-0.00064		15.3685	-0.00537
15.7836	-0.00119		15.784	-0.00066		15.788	-0.00063		15.3767	-0.00471
15.7918	-0.00093		15.7922	-0.00067		15.7962	-0.00045		15.3849	-0.00404
15.8	-0.00089		15.8004	-0.00074		15.8043	-0.0004		15.3931	-0.0038
15.8081	-0.00091		15.8086	-0.00071		15.8125	-0.00035		15.4013	-4.8e-05
15.8163	-0.00092		15.8168	-0.00066		15.8207	0.000592		15.4095	-0.00028
15.8245	-0.00096		15.825	-0.00063		15.8289	0.002007		15.4177	-0.00052
15.8327	-0.00091		15.8332	-0.00063		15.8371	0.002616		15.4258	-0.00275
15.8409	-0.00079		15.8414	-0.00063		15.8453	0.001966		15.434	-0.00731
15.8491	-0.00078		15.8495	-0.00065		15.8535	0.001315		15.4422	-0.00853
15.8573	-0.00078		15.8577	-0.0006		15.8617	-2.6e-05		15.4504	-0.00906
15.8655	-0.00078		15.8659	-0.0006		15.8699	-0.00038		15.4586	-0.00972
15.8736	-0.00077		15.8741	-0.0006		15.878	-0.00049		15.4668	-0.00986
15.8818	-0.00078		15.8823	-0.0006		15.8862	-0.00049		15.475	-0.00988
15.89	-0.00078		15.8905	-0.00056		15.8944	-0.00049		15.4832	-0.00793
15.8982	-0.00079		15.8987	-0.00054		15.9026	-0.0005		15.4914	-0.00632
15.9064	-0.00082		15.9069	-0.00053		15.9108	-0.00056		15.4995	-0.00606
15.9146	-0.00089		15.9151	-0.00053		15.919	-0.00057		15.5077	-0.00724
15.9228	-0.001		15.9232	-0.00055		15.9272	-0.00057		15.5159	-0.00843
15.931	-0.0011		15.9314	-0.00057		15.9354	-0.0006		15.5241	-0.00981
15.9392	-0.00108		15.9396	-0.00054		15.9436	-0.00065		15.5323	-0.00954
15.9474	-0.00107		15.9478	-0.00054		15.9518	-0.00063		15.5405	-0.00828
15.9556	-0.00107		15.956	-0.00054		15.9599	-0.00059		15.5487	-0.00656
15.9637	-0.00107		15.9642	-0.00054		15.9681	-0.00058		15.5569	-0.00329
15.9719	-0.00104		15.9724	-0.00064		15.9763	-0.00053		15.5651	-0.00219
15.9801	-0.001		15.9806	-0.0007		15.9845	-0.00053		15.5732	-0.00178
15.9883	-0.00085		15.9888	-0.00067		15.9927	-0.00053		15.5814	-0.00227
15.9965	-0.0009		15.997	-0.00061		16.0009	-0.00053		15.5896	-0.00276
16.0047	-0.00095		16.0051	-0.00059		16.0091	-0.00038		15.5978	-0.00419
16.0129	-0.00108		16.0133	-0.00057		16.0173	-0.00031		15.606	-0.00646
16.0211	-0.00113		16.0215	-0.00057		16.0255	-0.00032		15.6142	-0.01005
16.0293	-0.00113		16.0297	-0.00057		16.0337	-0.00033		15.6224	-0.01271
16.0374	-0.00113		16.0379	-0.00058		16.0419	-0.00036		15.6306	-0.01089
16.0456	-0.00114		16.0461	-0.00059		16.05	-0.00042		15.6388	-0.00854
16.0538	-0.0012		16.0543	-0.00063		16.0582	-0.0006		15.647	-0.00751
16.062	-0.00121		16.0625	-0.00068		16.0664	-0.00061		15.6552	-0.00648
16.0702	-0.00121		16.0707	-0.0006		16.0746	-0.00063		15.6633	-0.00528
16.0784	-0.00098		16.0788	-0.00056		16.0828	-0.00055		15.6715	1.24e-05
16.0866	-0.00097		16.087	-0.00057		16.091	0.00056		15.6797	6.4e-05
16.0948	-0.00095		16.0952	-0.00058		16.0992	0.000985		15.6879	-0.00061
16.103	-0.00087		16.1034	-0.00063		16.1074	0.000964		15.6961	-0.00128
16.1112	-0.00083		16.1116	-0.00064		16.1156	0.000943		15.7043	-0.00337
16.1194	-0.0008		16.1198	-0.00056		16.1238	0.000879		15.7125	-0.00341
16.1275	-0.00074		16.128	-0.00055		16.1319	0.000101		15.7207	-0.00466
[truncated: 10,290 more rows]

## Sheet: 7 e
time (min)	2E+10 particles		time (min)	4E+10 particles		time (min)	6E+10 particles
-0.23125	3.59e-05		-0.23125	0.001648		-0.23443	-6.7e-05
-0.22306	-9.2e-06		-0.22306	0.000814		-0.22624	-3.3e-05
-0.21487	2.78e-06		-0.21487	-2.1e-05		-0.21805	6.84e-05
-0.20668	4.29e-06		-0.20668	-4.6e-05		-0.20986	9.09e-05
-0.19849	5.81e-06		-0.19849	-7.2e-05		-0.20167	7.8e-05
-0.1903	8.55e-05		-0.1903	-9.7e-05		-0.19348	6.51e-05
-0.18211	0.000217		-0.18211	0.000398		-0.18529	2.97e-05
-0.17392	0.00028		-0.17392	0.000483		-0.1771	0.001418
-0.16573	0.000296		-0.16573	0.000472		-0.16891	0.003722
-0.15754	0.000199		-0.15754	0.000461		-0.16072	0.003749
-0.14935	0.000102		-0.14935	0.000193		-0.15253	0.003258
-0.14116	9.87e-05		-0.14116	-9.1e-05		-0.14435	0.002767
-0.13297	9.55e-05		-0.13297	-0.00014		-0.13616	0.001781
-0.12478	5.43e-05		-0.12478	-0.00018		-0.12797	0.001682
-0.11659	4.44e-06		-0.11659	-0.00025		-0.11978	0.000568
-0.1084	-3.2e-05		-0.1084	-0.00019		-0.11159	0.000288
-0.10021	-2e-05		-0.10021	-0.00011		-0.1034	0.000285
-0.09202	-1.7e-05		-0.09202	-9.1e-05		-0.09521	0.000272
-0.08383	-1.4e-05		-0.08383	-8.8e-05		-0.08702	0.00026
-0.07564	9.11e-06		-0.07564	-8.8e-05		-0.07883	0.00017
-0.06745	1.26e-05		-0.06745	-9.3e-05		-0.07064	7.26e-05
-0.05926	1.3e-05		-0.05926	-9.9e-05		-0.06245	5.34e-05
-0.05107	1.31e-05		-0.05107	-0.00011		-0.05426	3.41e-05
-0.04288	7.49e-06		-0.04288	-0.00014		-0.04607	-6.1e-05
-0.03469	1.93e-06		-0.03469	-0.00013		-0.03788	-4.1e-05
-0.0265	-1.1e-05		-0.0265	-0.00013		-0.02969	-9e-07
-0.01831	5.42e-05		-0.01831	0.000206		-0.0215	1.64e-06
-0.01013	6.37e-05		-0.01013	0.000211		-0.01331	2.84e-06
-0.00194	4.39e-05		-0.00194	0.000129		-0.00512	3.17e-06
0.006254	2.41e-05		0.006254	4.58e-05		0.003071	1.15e-06
0.014444	-1.7e-05		0.014444	-0.00012		0.011261	-8.7e-07
0.022634	-9.4e-05		0.022634	-0.00013		0.019451	-7.9e-06
0.030824	-4e-05		0.030824	-0.00015		0.02764	7.97e-06
0.039014	-1.9e-05		0.039014	-9.1e-05		0.03583	1.56e-05
0.047203	-9.5e-06		0.047203	0.000147		0.04402	1.44e-05
0.055393	-3.8e-07		0.055393	0.000377		0.05221	1.32e-05
0.063583	5.46e-06		0.063583	0.000444		0.0604	-1e-06
0.071773	5.86e-06		0.071773	0.000424		0.068589	-1.5e-05
0.079962	-6.9e-07		0.079962	0.000404		0.076779	-0.00019
0.088152	-7.2e-06		0.088152	0.000161		0.084969	-0.00013
0.096342	-2.3e-05		0.096342	-7.8e-05		0.093159	0.000163
0.104532	9.81e-05		0.104532	-0.00013		0.101348	0.000181
0.112722	0.001097		0.112722	-0.0001		0.109538	0.00018
0.120911	0.001101		0.120911	-9e-05		0.117728	0.00018
0.129101	0.001061		0.129101	-0.0001		0.125918	0.00012
0.137291	0.001021		0.137291	-0.00012		0.134108	8e-05
0.145481	0.000469		0.145481	-0.00014		0.142297	0.000139
0.15367	0.000176		0.15367	-0.00024		0.150487	0.000364
0.16186	0.000101		0.16186	-0.00023		0.158677	0.000378
0.17005	-1.8e-05		0.17005	-0.00017		0.166867	0.000378
0.17824	8.56e-06		0.17824	-0.00017		0.175057	0.000379
0.18643	8.75e-05		0.18643	-0.00017		0.183246	0.000444
0.194619	0.000204		0.194619	-0.00017		0.191436	0.000582
0.202809	0.000181		0.202809	-0.00017		0.199626	0.000598
0.210999	0.000157		0.210999	-0.00019		0.207816	0.00059
0.219189	7.58e-05		0.219189	-0.00017		0.216005	0.000581
0.227379	1.86e-05		0.227379	-0.00017		0.224195	0.000104
0.235568	3.7e-05		0.235568	-0.00017		0.232385	7.14e-05
0.243758	5.58e-05		0.243758	-0.00015		0.240575	3.85e-05
0.251948	5.86e-05		0.251948	2.85e-05		0.248765	-2.2e-05
0.260138	5.9e-05		0.260138	2.7e-05		0.256954	-2.8e-05
0.268327	5.95e-05		0.268327	2.55e-05		0.265144	6.08e-05
0.276517	0.000223		0.276517	2.17e-05		0.273334	0.000459
0.284707	0.000231		0.284707	2.81e-06		0.281524	0.000853
0.292897	0.000235		0.292897	1.67e-06		0.289714	0.000855
0.301087	0.000126		0.301087	5.27e-07		0.297903	0.000837
0.309276	1.67e-05		0.309276	-3.4e-05		0.306093	0.000818
0.317466	-0.0001		0.317466	-0.00012		0.314283	0.000723
0.325656	-2.6e-05		0.325656	-0.00018		0.322473	0.000262
0.333846	-3.1e-06		0.333846	-0.00022		0.330662	0.000231
0.342035	-8.2e-06		0.342035	-0.00027		0.338852	0.000601
0.350225	-1.3e-05		0.350225	-0.00026		0.347042	0.00056
0.358415	-2.8e-05		0.358415	-0.00023		0.355232	0.000519
0.366605	-0.0001		0.366605	-0.00023		0.363422	0.000357
0.374795	-8.8e-05		0.374795	-0.00023		0.371611	-4.1e-06
0.382984	-8.2e-05		0.382984	-0.00023		0.379801	-3.4e-05
0.391174	-7.6e-05		0.391174	-0.00024		0.387991	5.72e-05
0.399364	7.65e-05		0.399364	-0.00021		0.396181	6e-05
0.407554	8.56e-05		0.407554	-0.0002		0.40437	6.28e-05
0.415744	8.56e-05		0.415744	-0.0002		0.41256	6.81e-05
0.423933	7.34e-05		0.423933	-0.00021		0.42075	7.34e-05
0.432123	6.13e-05		0.432123	-0.00022		0.42894	7.3e-05
0.440313	3.69e-05		0.440313	-0.00025		0.43713	7.25e-05
0.448503	0.000193		0.448503	-0.00023		0.445319	6.31e-05
0.456692	0.000221		0.456692	-0.00022		0.453509	7.42e-06
0.464882	0.000225		0.464882	-0.00022		0.461699	-0.00011
0.473072	0.000223		0.473072	-0.00022		0.469889	-8.5e-05
0.481262	0.000222		0.481262	-0.00022		0.478079	-7.2e-05
0.489452	0.000202		0.489452	-0.00019		0.486268	-6.6e-05
0.497641	3.87e-05		0.497641	-0.00019		0.494458	-6.1e-05
0.505831	5.75e-06		0.505831	-0.00019		0.502648	-2e-05
0.514021	-5.2e-05		0.514021	-0.00019		0.510838	6.14e-05
0.522211	-7.9e-05		0.522211	-0.00014		0.519027	6.22e-05
0.530401	-3.8e-05		0.530401	-0.00012		0.527217	6.17e-05
0.53859	-2.9e-05		0.53859	-0.00013		0.535407	6.12e-05
0.54678	-2.4e-05		0.54678	-0.00013		0.543597	-2.3e-05
0.55497	-2.3e-05		0.55497	-0.00014		0.551787	-2.3e-05
0.56316	-2.2e-05		0.56316	-0.00013		0.559976	-2.4e-05
0.571349	-2e-05		0.571349	-0.00013		0.568166	-2.6e-05
0.579539	-1.7e-05		0.579539	-0.00013		0.576356	5.85e-05
0.587729	5.02e-05		0.587729	-0.00014		0.584546	0.000124
0.595919	0.000152		0.595919	-0.0002		0.592736	0.000158
0.604109	0.00047		0.604109	-0.00019		0.600925	0.000266
0.612298	0.000503		0.612298	-0.00019		0.609115	0.000302
0.620488	0.000484		0.620488	-0.00019		0.617305	0.000317
0.628678	0.000465		0.628678	-0.00019		0.625495	0.000307
0.636868	0.000305		0.636868	-0.00019		0.633684	0.000298
0.645057	0.000301		0.645057	-0.00019		0.641874	5.15e-05
0.653247	0.000298		0.653247	-0.00018		0.650064	0.000202
0.661437	0.000224		0.661437	-0.00018		0.658254	0.000233
0.669627	5.77e-05		0.669627	0.000402		0.666444	0.000238
0.677817	1.77e-05		0.677817	0.001305		0.674633	0.000229
0.686006	8.07e-05		0.686006	0.001632		0.682823	0.00022
0.694196	0.0001		0.694196	0.00196		0.691013	0.000202
0.702386	0.000119		0.702386	0.001972		0.699203	0.000166
0.710576	0.000127		0.710576	0.001971		0.707393	8.37e-05
0.718766	0.000126		0.718766	0.00197		0.715582	-6.8e-05
0.726955	0.000124		0.726955	0.001738		0.723772	-5.9e-05
0.735145	0.000102		0.735145	1.02e-05		0.731962	-5.8e-05
0.743335	3.74e-05		0.743335	-0.00013		0.740152	-5.7e-05
0.751525	-4.6e-05		0.751525	-0.0001		0.748341	1.55e-05
0.759714	-8e-05		0.759714	-7.3e-05		0.756531	0.000393
0.767904	-6.4e-05		0.767904	-1.4e-05		0.764721	0.00039
0.776094	-6.2e-05		0.776094	0.000152		0.772911	0.000387
0.784284	-4.5e-05		0.784284	0.000166		0.781101	0.000367
0.792474	-2.9e-05		0.792474	0.000166		0.78929	-5.2e-05
0.800663	-2.8e-05		0.800663	7.74e-05		0.79748	-6.5e-05
0.808853	-2.8e-05		0.808853	-1.1e-05		0.80567	-9.7e-05
0.817043	-2.8e-05		0.817043	-9.1e-05		0.81386	-0.00014
0.825233	-4e-05		0.825233	-0.00019		0.822049	-0.00015
0.833423	-6.2e-05		0.833423	-0.00022		0.830239	-0.00019
0.841612	-8.6e-05		0.841612	-0.00017		0.838429	-0.00023
0.849802	-6.5e-05		0.849802	-0.00011		0.846619	-0.00026
0.857992	-4.3e-05		0.857992	-0.0001		0.854809	0.00015
0.866182	-7.7e-06		0.866182	-9.9e-05		0.862998	0.000298
0.874371	-3e-06		0.874371	-0.00011		0.871188	0.000447
0.882561	-6.3e-06		0.882561	-0.00011		0.879378	0.000388
0.890751	-9.6e-06		0.890751	-0.00016		0.887568	0.000329
0.898941	-3.3e-05		0.898941	-0.0002		0.895758	0.000188
0.907131	-8.7e-05		0.907131	-0.00014		0.903947	-9.8e-05
0.91532	-9.3e-05		0.91532	2.76e-05		0.912137	9.24e-05
0.92351	-9.1e-05		0.92351	0.000226		0.920327	0.000143
0.9317	-7.1e-05		0.9317	0.000416		0.928517	0.000194
0.93989	-6.7e-05		0.93989	0.000616		0.936706	0.000256
0.948079	-7.7e-05		0.948079	0.000659		0.944896	0.000286
0.956269	-8.6e-05		0.956269	0.000679		0.953086	0.000295
0.964459	-0.00011		0.964459	0.000336		0.961276	0.000304
0.972649	-3.4e-05		0.972649	-6.5e-06		0.969466	0.000314
0.980839	-3.2e-05		0.980839	-7.2e-06		0.977655	0.000317
0.989028	-3.5e-05		0.989028	-7.9e-06		0.985845	0.000265
0.997218	-3.8e-05		0.997218	-9.4e-06		0.994035	0.000214
1.00541	-5.7e-05		1.00541	-3.3e-05		1.00222	-2.1e-05
1.0136	-4.9e-05		1.0136	-4.1e-05		1.01042	8.49e-05
1.02179	-4e-05		1.02179	-4.9e-05		1.0186	0.0001
1.02998	-7.4e-06		1.02998	-6.6e-05		1.02679	0.000116
1.03817	6.39e-05		1.03817	-0.00015		1.03498	0.00019
1.04636	0.000178		1.04636	-0.00015		1.04317	0.000213
1.05455	0.000587		1.05455	-0.00016		1.05136	0.000236
1.06274	0.001993		1.06274	-0.00017		1.05955	0.000252
1.07093	0.002171		1.07093	-0.00016		1.06774	0.000255
1.07912	0.002194		1.07912	-0.00016		1.07593	0.000258
1.08731	0.002193		1.08731	-0.00016		1.08412	0.000768
1.0955	0.002192		1.0955	-0.00016		1.09231	0.001279
1.10369	0.002131		1.10369	-0.00013		1.1005	0.001347
1.11187	0.002106		1.11187	-0.00012		1.10869	0.001379
1.12007	0.001031		1.12007	-0.00012		1.11688	0.001364
1.12826	0.000289		1.12826	-0.00012		1.12507	0.001349
1.13644	-2.6e-05		1.13644	-8.3e-05		1.13326	0.001067
1.14463	-2.9e-05		1.14463	-5.2e-05		1.14145	0.000785
1.15282	1.94e-05		1.15282	-2e-05		1.14964	0.000763
1.16101	2.23e-05		1.16101	8.72e-05		1.15783	0.000979
1.1692	1.99e-05		1.1692	0.000123		1.16602	0.001228
1.17739	1.76e-05		1.17739	0.000159		1.17421	0.001382
1.18558	1.18e-05		1.18558	0.000247		1.1824	0.001458
1.19377	2.06e-06		1.19377	0.000358		1.19059	0.001495
1.20196	7.26e-05		1.20196	0.000402		1.19878	0.001376
1.21015	0.000211		1.21015	0.00039		1.20697	0.001256
1.21834	0.000941		1.21834	0.000377		1.21516	0.001015
1.22653	0.002494		1.22653	0.000341		1.22335	0.000539
1.23472	0.003187		1.23472	0.000157		1.23154	0.000613
1.24291	0.002491		1.24291	-9.6e-05		1.23973	0.000614
1.2511	0.001795		1.2511	-5.5e-05		1.24792	0.000614
1.25929	0.00024		1.25929	-5.5e-05		1.25611	0.000614
1.26748	7.09e-05		1.26748	-5.4e-05		1.2643	0.000523
1.27567	0.000165		1.27567	-3.4e-06		1.27249	0.000519
1.28386	0.00021		1.28386	2.03e-05		1.28068	0.000514
1.29205	0.000225		1.29205	2.52e-05		1.28887	0.000493
1.30024	0.000224		1.30024	2.75e-05		1.29706	0.000439
1.30843	0.000223		1.30843	2.75e-05		1.30525	0.000312
1.31662	0.000206		1.31662	2.73e-05		1.31344	0.000156
1.32481	0.000136		1.32481	2.71e-05		1.32163	0.000334
1.333	-2.1e-05		1.333	2.42e-05		1.32982	0.001067
1.34119	-6.5e-05		1.34119	-7e-05		1.33801	0.001219
1.34938	-6.3e-05		1.34938	-2.8e-05		1.3462	0.00137
1.35757	-6.3e-05		1.35757	-1e-05		1.35438	0.001379
1.36576	-6.3e-05		1.36576	-1.1e-05		1.36258	0.001384
1.37395	-6.3e-05		1.37395	-1.1e-05		1.37077	0.001385
1.38214	-5e-05		1.38214	-1.3e-05		1.37895	0.001372
1.39033	6.81e-05		1.39033	-5e-05		1.38715	0.001359
1.39852	0.000135		1.39852	-0.00011		1.39533	0.001331
1.40671	0.000243		1.40671	-5e-05		1.40352	0.000973
1.4149	0.00123		1.4149	-4.9e-05		1.41171	0.001061
1.42309	0.001344		1.42309	-5e-05		1.4199	0.001102
1.43128	0.001351		1.43128	-5e-05		1.42809	0.001118
1.43947	0.001353		1.43947	-5.2e-05		1.43628	0.001134
1.44766	0.0008		1.44766	-6.9e-05		1.44447	0.001253
1.45585	0.000246		1.45585	-0.00011		1.45266	0.001308
1.46404	7.15e-05		1.46404	-0.00012		1.46085	0.001281
1.47223	6.64e-05		1.47223	-0.00013		1.46904	0.001254
1.48042	6.14e-05		1.48042	-0.00015		1.47723	0.001196
1.4886	4.84e-05		1.4886	-0.00017		1.48542	0.000933
1.4968	-6.6e-05		1.4968	-0.0001		1.49361	0.000839
1.50499	7.59e-05		1.50499	-8.7e-05		1.5018	0.000867
1.51317	0.000138		1.51317	-9e-05		1.50999	0.000845
1.52136	0.000146		1.52136	-9.3e-05		1.51818	0.000823
1.52955	0.000105		1.52955	-0.0001		1.52637	0.000778
1.53774	6.27e-05		1.53774	-0.00013		1.53456	0.000576
1.54593	-1e-05		1.54593	-0.00018		1.54275	0.000553
1.55412	-4.9e-05		1.55412	-0.00015		1.55094	0.000513
1.56231	-8.4e-05		1.56231	-0.00015		1.55913	0.000472
1.5705	-9.5e-05		1.5705	-0.00014		1.56732	0.000368
1.57869	-3.6e-05		1.57869	-0.00014		1.57551	0.000366
1.58688	-2.8e-05		1.58688	-9.8e-05		1.5837	0.000365
1.59507	-2.5e-05		1.59507	-9.6e-05		1.59189	0.00036
1.60326	-2.4e-05		1.60326	-9.4e-05		1.60008	0.000329
1.61145	-3.4e-05		1.61145	-8.5e-05		1.60827	9.05e-05
1.61964	-4.4e-05		1.61964	-4.7e-05		1.61646	-5e-05
1.62783	-1.7e-05		1.62783	-1.8e-05		1.62465	-0.00011
1.63602	2.57e-05		1.63602	-3.3e-05		1.63284	-0.00013
1.64421	5.81e-05		1.64421	-4.8e-05		1.64103	1.07e-05
1.6524	0.000105		1.6524	-7.9e-05		1.64922	7.97e-05
1.66059	0.000123		1.66059	-0.00014		1.65741	0.00011
1.66878	0.000123		1.66878	-0.00016		1.6656	0.000141
1.67697	0.000123		1.67697	-0.00018		1.67379	0.000215
1.68516	0.000121		1.68516	-0.00013		1.68198	0.000252
1.69335	0.000119		1.69335	-0.00011		1.69017	0.000232
1.70154	0.000115		1.70154	-0.0001		1.69836	0.000213
1.70973	0.000243		1.70973	-0.0001		1.70655	0.000158
1.71792	0.000417		1.71792	-0.0001		1.71474	0.000106
1.72611	0.000451		1.72611	-0.0001		1.72293	0.000452
1.7343	0.000462		1.7343	-0.00012		1.73112	0.000527
1.74249	0.000446		1.74249	-9.9e-05		1.73931	0.000562
1.75068	0.000429		1.75068	-9.6e-05		1.7475	0.000538
1.75887	0.000296		1.75887	-9.6e-05		1.75568	0.000515
1.76706	0.000123		1.76706	-9.5e-05		1.76388	0.000458
1.77525	-1.2e-05		1.77525	0.000176		1.77206	0.000233
1.78344	2.6e-05		1.78344	0.000161		1.78025	0.000265
1.79163	3.88e-05		1.79163	0.000145		1.78844	0.000604
1.79982	5.16e-05		1.79982	0.000104		1.79663	0.001079
1.80801	0.000129		1.80801	1.65e-05		1.80482	0.001148
1.8162	0.000155		1.8162	-0.00014		1.81301	0.001153
1.82439	0.000167		1.82439	-0.00016		1.8212	0.001154
1.83258	0.000168		1.83258	1.69e-05		1.82939	0.001144
1.84077	0.000168		1.84077	3.33e-05		1.83758	0.001133
1.84896	0.000168		1.84896	7.4e-06		1.84577	0.00112
1.85715	0.000166		1.85715	-1.8e-05		1.85396	0.0015
1.86533	0.000164		1.86533	-7.6e-05		1.86215	0.001554
1.87353	0.000206		1.87353	-0.00017		1.87034	0.001783
1.88172	0.000203		1.88172	-0.00013		1.87853	0.001778
1.8899	0.0002		1.8899	-8.8e-05		1.88672	0.001773
1.89809	0.000194		1.89809	-3.8e-05		1.89491	0.001754
1.90628	0.000132		1.90628	-3.8e-05		1.9031	0.001712
1.91447	9.85e-05		1.91447	-3.9e-05		1.91129	0.001854
1.92266	5.3e-06		1.92266	-4.1e-05		1.91948	0.001895
1.93085	-4.2e-05		1.93085	-7.2e-05		1.92767	0.001846
1.93904	7.46e-05		1.93904	-0.00012		1.93586	0.001798
1.94723	0.000129		1.94723	-0.00016		1.94405	0.001679
1.95542	0.000111		1.95542	-0.00019		1.95224	0.001684
1.96361	9.34e-05		1.96361	-0.00012		1.96043	0.001681
1.9718	4.57e-05		1.9718	4.96e-05		1.96862	0.001678
1.97999	2.59e-05		1.97999	5.31e-05		1.97681	0.001653
1.98818	7.76e-05		1.98818	2.34e-05		1.985	0.001401
1.99637	0.000131		1.99637	-6.2e-06		1.99319	0.001291
2.00456	0.000258		2.00456	-0.00015		2.00138	0.001284
2.01275	0.000314		2.01275	-0.0002		2.00957	0.001276
2.02094	0.000327		2.02094	-0.00021		2.01776	0.001257
2.02913	0.00034		2.02913	-0.00024		2.02595	0.001593
2.03732	0.000525		2.03732	-0.00021		2.03414	0.001753
2.04551	0.000526		2.04551	-0.00019		2.04233	0.001802
2.0537	0.000521		2.0537	-0.00017		2.05052	0.001667
2.06189	0.000517		2.06189	-0.00013		2.05871	0.001531
2.07008	0.000491		2.07008	-7e-05		2.0669	0.001153
2.07827	0.000434		2.07827	-1.6e-05		2.07509	0.001141
2.08646	0.000243		2.08646	9.23e-05		2.08328	0.00113
2.09465	0.00022		2.09465	9.72e-05		2.09147	0.001105
2.10284	0.000197		2.10284	0.000102		2.09966	0.000988
2.11103	0.00015		2.11103	0.000291		2.10785	0.000838
2.11922	0.000151		2.11922	0.000373		2.11604	0.000829
2.12741	0.000128		2.12741	0.000392		2.12423	0.000819
2.1356	0.000106		2.1356	0.000401		2.13241	0.000807
2.14379	6.12e-05		2.14379	0.000243		2.1406	0.00064
2.15198	0.000261		2.15198	8.56e-05		2.14879	0.000467
2.16017	0.000246		2.16017	-0.00014		2.15698	0.000592
2.16836	0.000231		2.16836	-0.00013		2.16517	0.000653
2.17655	0.000188		2.17655	-5.7e-05		2.17336	0.000714
2.18474	0.000101		2.18474	0.000139		2.18155	0.000832
2.19293	-1.3e-06		2.19293	0.000552		2.18974	0.001033
2.20112	2.73e-05		2.20112	0.000732		2.19793	0.001064
2.20931	2.97e-05		2.20931	0.000703		2.20612	0.001064
2.2175	2.72e-05		2.2175	0.000674		2.21431	0.001059
2.22569	2.46e-05		2.22569	0.000582		2.2225	0.001054
2.23388	2.2e-05		2.23388	0.001592		2.23069	0.000823
2.24207	1.94e-05		2.24207	0.001931		2.23888	0.000806
2.25026	1.43e-05		2.25026	0.001472		2.24707	0.000788
2.25845	-1.9e-05		2.25845	0.001014		2.25526	0.000663
2.26663	1.39e-05		2.26663	-1e-05		2.26345	0.000267
2.27482	0.000102		2.27482	-3.5e-05		2.27164	0.000238
2.28301	0.000191		2.28301	-2.2e-05		2.27983	0.000625
2.2912	0.000183		2.2912	-8.9e-06		2.28802	0.000811
2.29939	0.000175		2.29939	-3.6e-06		2.29621	0.000885
2.30758	0.000154		2.30758	-1.2e-05		2.3044	0.000958
2.31577	3.89e-05		2.31577	-2.1e-05		2.31259	0.00096
2.32396	-3.3e-05		2.32396	-4e-05		2.32078	0.000961
2.33215	-3.5e-05		2.33215	2.64e-05		2.32897	0.000903
2.34034	-3.7e-05		2.34034	5.43e-05		2.33716	0.000844
2.34853	-4.2e-05		2.34853	3.42e-05		2.34535	0.000344
2.35672	3.56e-05		2.35672	1.42e-05		2.35354	8.39e-05
2.36491	0.000245		2.36491	-2.7e-05		2.36173	0.000263
2.3731	0.000987		2.3731	-3.1e-05		2.36992	0.000282
2.38129	0.001029		2.38129	-3.4e-05		2.37811	0.000282
2.38948	0.000918		2.38948	-0.00017		2.3863	0.000282
2.39767	0.000807		2.39767	-0.00023		2.39449	0.000282
2.40586	0.000191		2.40586	-0.00024		2.40268	0.000258
2.41405	-2.6e-05		2.41405	-0.0002		2.41087	8.17e-05
2.42224	9.77e-06		2.42224	-0.0002		2.41906	0.000142
2.43043	9.28e-05		2.43043	-0.0002		2.42725	0.000432
2.43862	0.000106		2.43862	-0.0002		2.43544	0.000439
2.44681	0.000125		2.44681	-0.00017		2.44363	0.000437
2.455	0.00013		2.455	-4.5e-05		2.45182	0.000434
2.46319	0.000114		2.46319	-4.3e-05		2.46001	0.00041
2.47138	9.77e-05		2.47138	-4.3e-05		2.4682	0.00039
2.47957	1.16e-05		2.47957	-4.3e-05		2.47639	0.000248
2.48776	-5.5e-05		2.48776	4.22e-06		2.48458	0.000225
2.49595	-4.4e-05		2.49595	0.000187		2.49277	0.000201
2.50414	-4.4e-05		2.50414	0.000177		2.50095	-1.6e-05
2.51233	-4.6e-05		2.51233	0.000166		2.50915	5.89e-05
2.52052	-4.8e-05		2.52052	0.000139		2.51734	8.48e-05
2.52871	-3e-05		2.52871	8.46e-05		2.52553	9.65e-05
2.5369	0.000517		2.5369	1.95e-05		2.53371	9.91e-05
2.54509	0.000771		2.54509	-4.6e-05		2.5419	0.000102
2.55328	0.000615		2.55328	-0.00017		2.55009	0.000265
2.56147	0.00046		2.56147	-0.00017		2.55828	0.000759
2.56966	6.45e-05		2.56966	-4.2e-06		2.56647	0.000798
2.57785	-6.7e-05		2.57785	4.68e-05		2.57466	0.000818
2.58604	-5.4e-05		2.58604	4.76e-05		2.58285	0.000827
2.59423	7.1e-05		2.59423	3.83e-05		2.59104	0.000774
2.60242	0.000125		2.60242	2.9e-05		2.59923	0.000721
2.61061	9.06e-05		2.61061	-0.00014		2.60742	0.00048
2.61879	5.59e-05		2.61879	-0.00017		2.61561	0.000563
2.62698	8.59e-05		2.62698	-0.00017		2.6238	0.000571
2.63517	0.000101		2.63517	-0.00018		2.63199	0.000565
2.64337	0.000108		2.64337	-0.0002		2.64018	0.00056
2.65155	9.54e-05		2.65155	-0.00023		2.64837	0.000532
2.65974	8.33e-05		2.65974	-0.00023		2.65656	0.000504
2.66793	7.49e-05		2.66793	-0.00018		2.66475	0.000372
2.67612	6.06e-06		2.67612	-0.00014		2.67294	0.000262
2.68431	4.34e-05		2.68431	-7.8e-05		2.68113	0.000442
2.6925	4.4e-05		2.6925	-6.9e-05		2.68932	0.000504
2.70069	4.34e-05		2.70069	-7.3e-05		2.69751	0.000565
2.70888	4.27e-05		2.70888	-7.6e-05		2.7057	0.000774
2.71707	5.66e-05		2.71707	-0.00018		2.71389	0.000796
2.72526	5.67e-05		2.72526	-0.00023		2.72208	0.000792
2.73345	5.4e-05		2.73345	-0.00022		2.73027	0.000789
2.74164	5.13e-05		2.74164	-0.00016		2.73846	0.000717
2.74983	2.64e-05		2.74983	-1.2e-05		2.74665	0.000327
2.75802	1.95e-05		2.75802	8.81e-05		2.75484	0.000444
2.76621	1.27e-05		2.76621	6.27e-05		2.76303	0.000661
2.7744	4.43e-05		2.7744	3.73e-05		2.77122	0.001009
2.78259	4.19e-05		2.78259	-4.2e-05		2.77941	0.001094
2.79078	3.95e-05		2.79078	-0.00015		2.7876	0.001272
2.79897	3.21e-05		2.79897	-0.00018		2.79579	0.001303
2.80716	-3.4e-06		2.80716	-0.00018		2.80398	0.001161
2.81535	-3.2e-05		2.81535	-0.00015		2.81217	0.001018
2.82354	-3.2e-05		2.82354	-9.3e-05		2.82036	0.000581
2.83173	-3.2e-05		2.83173	0.001406		2.82855	0.000524
2.83992	-3.2e-05		2.83992	0.002129		2.83674	0.000467
2.84811	-2.4e-05		2.84811	0.002392		2.84493	0.000563
2.8563	-6.4e-06		2.8563	0.002484		2.85312	0.000757
2.86449	5.11e-07		2.86449	0.001861		2.86131	0.00076
2.87268	7.43e-06		2.87268	0.001238		2.8695	0.000682
2.88087	2.85e-05		2.88087	-1.5e-05		2.87769	0.000605
2.88906	3.87e-05		2.88906	-2.7e-05		2.88587	0.00045
2.89725	4.32e-05		2.89725	-3.8e-05		2.89406	0.000248
2.90544	3.12e-05		2.90544	-0.00013		2.90225	0.000243
2.91363	1.91e-05		2.91363	-0.00013		2.91045	0.000238
2.92182	1.63e-05		2.92182	-0.00014		2.91863	0.00022
2.93001	1.36e-05		2.93001	-0.00018		2.92682	0.000167
2.9382	-3.3e-05		2.9382	1.92e-05		2.93501	5.39e-05
2.94639	-8e-05		2.94639	4.08e-05		2.9432	-8.5e-05
2.95458	-9.9e-05		2.95458	3.55e-05		2.95139	-4.5e-05
2.96277	-0.00011		2.96277	3.02e-05		2.95958	4.4e-05
2.97096	-0.00011		2.97096	-4.9e-05		2.96777	8.53e-05
2.97915	-0.0001		2.97915	-5e-05		2.97596	9.65e-05
2.98734	-0.0001		2.98734	-5.1e-05		2.98415	4.93e-05
2.99553	-0.00011		2.99553	-5.4e-05		2.99234	2.14e-06
3.00372	-0.00011		3.00372	-0.00013		3.00053	-9e-05
3.01191	-9.3e-05		3.01191	-0.00015		3.00872	-1.6e-05
3.02009	-8.9e-05		3.02009	-0.00014		3.01691	0.000271
3.02828	-8.4e-05		3.02828	-0.00015		3.0251	0.000304
3.03647	1.33e-05		3.03647	-0.00015		3.03329	0.000311
3.04466	0.000297		3.04466	-0.00016		3.04148	0.000314
3.05285	0.000353		3.05285	-0.00021		3.04967	0.000314
3.06104	0.000508		3.06104	-0.00024		3.05786	0.00021
3.06923	0.000494		3.06923	-0.00023		3.06605	0.000107
3.07742	0.000479		3.07742	-0.00015		3.07424	8.88e-05
3.08561	0.000394		3.08561	-0.00015		3.08243	0.000198
3.0938	0.000287		3.0938	-0.00013		3.09062	0.000323
3.10199	0.000251		3.10199	-0.00013		3.09881	0.000328
3.11018	0.000216		3.11018	-0.00012		3.107	0.000329
3.11837	8.15e-05		3.11837	-6e-05		3.11519	0.000329
3.12656	5.79e-05		3.12656	0.000574		3.12338	0.000329
3.13475	6.21e-05		3.13475	0.000628		3.13157	0.000328
3.14294	5.76e-05		3.14294	0.000547		3.13976	2.47e-05
3.15113	5.32e-05		3.15113	0.000465		3.14795	-3.4e-05
3.15932	4.25e-05		3.15932	-4.7e-07		3.15614	0.000153
3.16751	-3.3e-05		3.16751	1.24e-05		3.16433	0.000174
3.1757	-7.7e-05		3.1757	-2.6e-05		3.17252	0.000184
3.18389	-0.00011		3.18389	-6.5e-05		3.18071	0.000181
3.19208	-0.00011		3.19208	-0.00015		3.1889	0.000178
3.20027	-0.00011		3.20027	-0.00012		3.19709	0.00017
3.20846	-0.00011		3.20846	-0.00012		3.20528	0.000221
3.21665	-0.00012		3.21665	-0.00012		3.21347	0.000284
3.22484	-8.7e-05		3.22484	-0.00012		3.22166	0.000297
3.23303	-8.7e-05		3.23303	-0.0002		3.22985	0.000296
3.24122	-8.7e-05		3.24122	-0.00027		3.23804	0.000294
3.24941	-9e-05		3.24941	-0.0002		3.24623	0.000285
3.2576	-9.2e-05		3.2576	-0.00019		3.25441	0.000267
3.26579	-9.8e-05		3.26579	-0.00015		3.26261	0.000206
3.27398	-0.0001		3.27398	-1.6e-05		3.2708	0.000145
3.28217	-7.1e-05		3.28217	-1.1e-05		3.27899	1.97e-05
3.29036	-5.5e-05		3.29036	-3.1e-05		3.28717	-7.7e-06
3.29855	-5.5e-05		3.29855	-5.1e-05		3.29536	-3.5e-05
3.30674	-5.5e-05		3.30674	-0.00017		3.30355	-9.5e-05
3.31493	-5.6e-05		3.31493	-0.00017		3.31174	-6.2e-05
3.32312	-6.6e-05		3.32312	-0.00019		3.31993	-3.5e-05
3.33131	-7.6e-05		3.33131	-0.00022		3.32812	-7.2e-06
3.3395	-0.0001		3.3395	-0.0002		3.33631	1.24e-05
3.34769	-7.5e-05		3.34769	-0.00012		3.3445	6.35e-05
3.35588	-4.9e-05		3.35588	-9.5e-05		3.35269	9.27e-05
3.36407	1.68e-05		3.36407	-8.4e-05		3.36088	0.000108
3.37226	1.96e-05		3.37226	-0.00014		3.36907	0.000122
3.38044	1.64e-05		3.38044	-0.0002		3.37726	0.000311
3.38863	1.31e-05		3.38863	-0.00023		3.38545	0.00032
3.39683	-1.2e-05		3.39683	-0.00021		3.39364	0.000311
3.40502	-1.6e-05		3.40502	-0.00015		3.40183	0.000302
3.4132	-2e-05		3.4132	-0.00014		3.41002	0.000244
3.42139	-8.7e-05		3.42139	-0.00014		3.41821	0.000148
3.42958	-7.7e-05		3.42958	-0.00013		3.4264	0.000106
3.43777	-6.4e-05		3.43777	-8.3e-05		3.43459	0.000193
3.44596	-5.9e-05		3.44596	-8.4e-05		3.44278	0.000234
3.45415	-5.4e-05		3.45415	-8.4e-05		3.45097	0.000235
3.46234	-1.1e-05		3.46234	-8.6e-05		3.45916	0.000236
3.47053	0.000112		3.47053	-9.8e-05		3.46735	0.000203
3.47872	0.000338		3.47872	-0.00019		3.47554	0.000171
3.48691	0.000329		3.48691	-0.00019		3.48373	1.16e-05
3.4951	0.00032		3.4951	-0.00019		3.49192	0.001853
3.50329	0.000291		3.50329	-0.0003		3.50011	0.002026
3.51148	0.000181		3.51148	-0.0003		3.5083	0.001845
3.51967	5.88e-05		3.51967	-0.0003		3.51649	0.001664
3.52786	-4.5e-05		3.52786	-0.00031		3.52468	0.000567
3.53605	-4.1e-05		3.53605	-0.00033		3.53287	0.000161
3.54424	1.36e-05		3.54424	-0.00033		3.54106	2.9e-05
3.55243	1.6e-05		3.55243	-0.00028		3.54925	-2.1e-05
3.56062	7.49e-06		3.56062	-0.00025		3.55744	-1.8e-05
3.56881	-1e-06		3.56881	-0.00024		3.56563	-2.1e-05
3.577	-5.3e-05		3.577	-0.00023		3.57382	-2.4e-05
3.58519	-0.00013		3.58519	-0.00023		3.58201	-0.00011
3.59338	5.7e-06		3.59338	-0.00023		3.5902	-2e-05
3.60157	5.04e-05		3.60157	-0.00026		3.59839	-1.1e-05
3.60976	7.17e-05		3.60976	-0.00028		3.60658	-7.8e-06
3.61795	7.18e-05		3.61795	-0.00026		3.61477	-5e-06
3.62614	7.09e-05		3.62614	-0.00024		3.62296	1.79e-05
3.63433	6.99e-05		3.63433	-0.00014		3.63115	6.14e-05
3.64252	6.55e-05		3.64252	-8.1e-05		3.63933	7.9e-05
3.65071	1.34e-05		3.65071	-0.0001		3.64752	9.66e-05
3.6589	-6.3e-06		3.6589	-0.00012		3.65571	0.000185
3.66709	-2.6e-05		3.66709	-0.00017		3.66391	0.000205
3.67528	1.35e-05		3.67528	-0.00011		3.67209	0.000225
3.68347	6.26e-05		3.68347	-0.00011		3.68028	0.000239
3.69166	0.000112		3.69166	-0.00011		3.68847	0.000305
3.69985	0.000135		3.69985	-0.00012		3.69666	0.000406
3.70804	0.000146		3.70804	-0.00014		3.70485	0.000643
3.71623	0.000128		3.71623	-0.00013		3.71304	0.000627
3.72442	0.00011		3.72442	-5.6e-05		3.72123	0.000612
3.73261	7.17e-05		3.73261	-5.6e-05		3.72942	0.000466
3.7408	-2.3e-05		3.7408	-6e-05		3.73761	0.000172
3.74898	0.000344		3.74898	-6.5e-05		3.7458	0.000155
3.75718	0.000318		3.75718	-8.6e-05		3.75399	0.000137
3.76537	0.000291		3.76537	-0.00021		3.76218	0.000536
3.77355	0.000225		3.77355	-0.00017		3.77037	0.001106
3.78174	9.18e-05		3.78174	-0.00015		3.77856	0.001133
3.78993	0.000173		3.78993	-0.00014		3.78675	0.001431
3.79812	0.000183		3.79812	-0.00018		3.79494	0.001458
3.80631	0.00018		3.80631	-0.00022		3.80313	0.001441
3.8145	0.000178		3.8145	-0.00021		3.81132	0.001424
3.82269	-2.1e-05		3.82269	-0.00017		3.81951	0.001261
3.83088	4.85e-05		3.83088	-0.00016		3.8277	0.000353
3.83907	6.27e-05		3.83907	-0.00016		3.83589	0.000111
3.84726	6.97e-05		3.84726	-0.00016		3.84408	0.000121
3.85545	3.39e-05		3.85545	-0.00016		3.85227	0.000123
3.86364	-1.8e-06		3.86364	-0.00016		3.86046	0.000125
3.87183	-3.9e-05		3.87183	-0.00016		3.86865	0.00017
3.88002	8.8e-05		3.88002	-0.00017		3.87684	0.000166
3.88821	0.000207		3.88821	-0.0002		3.88503	0.000163
3.8964	0.000231		3.8964	-0.00029		3.89322	0.000155
3.90459	0.000236		3.90459	-0.00025		3.90141	0.000101
3.91278	0.000238		3.91278	-0.00023		3.9096	4.76e-05
3.92097	0.000232		3.92097	-7.4e-05		3.91779	-8.1e-05
3.92916	0.000226		3.92916	9.75e-05		3.92598	-5.9e-05
3.93735	0.000194		3.93735	0.000169		3.93417	-3.3e-05
3.94554	-6.8e-05		3.94554	0.000123		3.94236	-2.9e-05
3.95373	-7.1e-05		3.95373	7.62e-05		3.95055	-2.6e-05
3.96192	-7.3e-05		3.96192	-0.00021		3.95874	0.000166
3.97011	-0.00011		3.97011	-0.00021		3.96693	0.000172
3.9783	-6.7e-05		3.9783	-0.00021		3.97512	0.000174
3.98649	-6.1e-05		3.98649	-0.00022		3.98331	0.000158
3.99468	-5.5e-05		3.99468	-0.00026		3.9915	0.000142
4.00287	-4.7e-05		4.00287	-0.00026		3.99969	7.99e-05
4.01106	-4.5e-05		4.01106	-0.00026		4.00788	1.77e-05
4.01925	-4.4e-05		4.01925	-0.00026		4.01607	-8.1e-05
4.02744	2.5e-05		4.02744	-0.00026		4.02426	-8.1e-05
4.03563	3.7e-05		4.03563	-0.00026		4.03245	-8.2e-05
4.04382	4.89e-05		4.04382	-0.00024		4.04063	-9e-05
4.05201	8.58e-05		4.05201	-0.00019		4.04882	-0.00011
4.0602	9.11e-05		4.0602	-0.00014		4.05701	-2.3e-05
4.06839	8e-05		4.06839	-0.00013		4.0652	-2e-05
4.07658	6.9e-05		4.07658	-0.00013		4.07339	-1.6e-05
4.08477	4.62e-05		4.08477	0.00017		4.08158	1.54e-05
4.09296	6.78e-05		4.09296	0.000175		4.08977	2.08e-05
4.10115	5.65e-05		4.10115	0.000173		4.09796	2.25e-05
4.10934	4.52e-05		4.10934	0.000172		4.10615	-2.2e-05
4.11753	1.87e-05		4.11753	0.000147		4.11434	-6.7e-05
4.12572	-3.6e-05		4.12572	-3.8e-05		4.12253	7.98e-05
4.13391	-9.9e-05		4.13391	-0.0002		4.13072	0.000153
4.1421	-0.00014		4.1421	-0.00031		4.13891	0.000158
4.15029	-0.00016		4.15029	-0.00027		4.1471	0.000154
4.15848	-0.00012		4.15848	-0.00018		4.15529	0.000151
4.16666	-7.4e-05		4.16666	-0.00017		4.16348	0.000103
4.17485	-6.3e-05		4.17485	-5.1e-05		4.17167	-3.6e-05
4.18304	-5.9e-05		4.18304	9.26e-05		4.17986	-6.7e-05
4.19123	-5.7e-05		4.19123	9.74e-05		4.18805	-5.3e-05
4.19942	-7.3e-05		4.19942	9.65e-05		4.19624	-2.4e-05
4.20761	-8.8e-05		4.20761	9.56e-05		4.20443	-1.6e-05
4.2158	-4.3e-05		4.2158	9.28e-05		4.21262	-3.1e-05
4.22399	5.22e-05		4.22399	5.29e-05		4.22081	-4.6e-05
4.23218	0.000602		4.23218	1.3e-05		4.229	2.21e-05
4.24037	0.000937		4.24037	2.16e-06		4.23719	2.18e-05
4.24856	0.000937		4.24856	-8.7e-06		4.24538	2.15e-05
4.25675	0.000937		4.25675	-4e-05		4.25357	1.02e-05
4.26494	0.000936		4.26494	-0.00011		4.26176	-8.3e-05
4.27313	8.66e-05		4.27313	-0.00019		4.26995	-0.00015
4.28132	-2e-05		4.28132	-0.00023		4.27814	-0.00018
4.28951	-3.6e-05		4.28951	-0.00023		4.28633	-5e-05
4.2977	-5.1e-05		4.2977	-0.0002		4.29452	2.65e-06
4.30589	-8.5e-05		4.30589	-0.00018		4.30271	1.1e-05
4.31408	-0.00014		4.31408	-0.00018		4.3109	1.93e-05
4.32227	-0.00012		4.32227	-0.00017		4.31909	8.51e-05
4.33046	-2.3e-05		4.33046	-0.00017		4.32728	0.000104
4.33865	-2.1e-05		4.33865	-0.00017		4.33547	0.000123
4.34684	-3.6e-05		4.34684	-0.00018		4.34366	0.000136
4.35503	-5.2e-05		4.35503	-0.00019		4.35185	0.000129
4.36322	-3.1e-05		4.36322	-0.00023		4.36004	0.000122
4.37141	-3.1e-05		4.37141	-0.00027		4.36823	0.000105
4.3796	-3.1e-05		4.3796	-0.00024		4.37642	3.47e-05
4.38779	-3.9e-05		4.38779	-8.9e-05		4.38461	-2.6e-06
4.39598	-7.9e-05		4.39598	-9.3e-05		4.39279	-3.1e-06
4.40417	-6.4e-05		4.40417	-9.7e-05		4.40099	-3.6e-06
4.41236	-6.4e-05		4.41236	-0.00011		4.40918	-6.1e-06
4.42055	-6.5e-05		4.42055	-0.00015		4.41737	-2.3e-05
4.42874	-6.6e-05		4.42874	-0.00018		4.42556	-2.5e-05
4.43693	-4e-06		4.43693	-0.00021		4.43374	-2.6e-05
4.44512	2.53e-05		4.44512	-0.00028		4.44193	-5.3e-05
4.45331	2.19e-05		4.45331	-0.00025		4.45012	-5.3e-05
4.4615	1.84e-05		4.4615	-0.00023		4.45831	-0.00014
4.46969	4.28e-06		4.46969	-0.00021		4.4665	4.61e-05
4.47788	1.55e-05		4.47788	-0.0002		4.47469	6.94e-05
4.48607	1.52e-05		4.48607	-0.00021		4.48288	4.18e-05
4.49426	1.48e-05		4.49426	-0.00022		4.49107	1.43e-05
4.50245	9.15e-06		4.50245	-0.00023		4.49926	-4.1e-05
4.51063	-4.1e-05		4.51063	-0.00033		4.50745	-5.3e-05
4.51882	-7.1e-05		4.51882	-0.00034		4.51564	-6.4e-05
4.52701	-0.00011		4.52701	-0.00027		4.52383	-0.0001
4.53521	-0.00013		4.53521	-0.00019		4.53202	-0.00014
4.54339	-0.00013		4.54339	-0.00017		4.54021	-0.00011
4.55158	-0.00015		4.55158	-0.00013		4.5484	-3.4e-05
4.55977	-0.00017		4.55977	-0.00012		4.55659	5.75e-06
4.56796	-9.3e-05		4.56796	-0.00012		4.56478	4.65e-05
4.57615	-7.9e-05		4.57615	-0.00012		4.57297	6.3e-05
4.58434	-7.9e-05		4.58434	-0.00012		4.58116	7.95e-05
4.59253	-8e-05		4.59253	-0.00012		4.58935	9.37e-05
4.60072	-8e-05		4.60072	-0.00013		4.59754	0.000108
4.60891	-9.1e-05		4.60891	-0.00015		4.60573	0.000228
4.6171	-9e-05		4.6171	-0.00022		4.61392	0.000571
4.62529	-9e-05		4.62529	-0.00025		4.62211	0.000744
4.63348	-9e-05		4.63348	-0.00014		4.6303	0.001604
4.64167	-9.2e-05		4.64167	-0.00014		4.63849	0.002022
4.64986	-9.5e-05		4.64986	-0.00015		4.64668	0.00214
4.65805	-9.8e-05		4.65805	-0.00015		4.65487	0.001487
4.66624	-0.00016		4.66624	-0.00027		4.66306	0.000833
4.67443	-9.3e-05		4.67443	-0.00037		4.67125	0.000223
4.68262	-4.5e-05		4.68262	-0.0003		4.67944	8.86e-05
4.69081	-5e-05		4.69081	-0.0003		4.68763	6.39e-05
4.699	-5.4e-05		4.699	-0.0003		4.69582	3.92e-05
4.70719	-6.3e-05		4.70719	-0.0003		4.70401	-2.4e-05
4.71538	-0.00011		4.71538	-0.0003		4.7122	-2.3e-05
4.72357	0.000452		4.72357	-0.00032		4.72039	-2.3e-05
4.73176	0.000573		4.73176	-0.00025		4.72858	-2.3e-05
4.73995	0.000626		4.73995	-0.00018		4.73677	-2.3e-05
4.74814	0.000602		4.74814	-0.00018		4.74496	-3.3e-05
4.75633	0.000578		4.75633	-0.00018		4.75315	-0.00013
4.76452	6.78e-05		4.76452	-0.00019		4.76134	-7.2e-05
4.77271	2.96e-05		4.77271	-0.00024		4.76953	-7.7e-05
4.7809	-3.9e-05		4.7809	-0.00021		4.77771	-8.2e-05
4.78909	-8.8e-05		4.78909	-0.00013		4.7859	-9.4e-05
4.79728	2.71e-05		4.79728	-0.0001		4.7941	-0.00016
4.80547	0.000108		4.80547	-0.00014		4.80229	-0.00016
4.81366	0.000119		4.81366	-0.00018		4.81047	-0.00016
4.82185	0.00013		4.82185	-0.00027		4.81866	-0.00016
4.83004	0.000155		4.83004	-0.0003		4.82685	-0.00017
4.83823	0.000158		4.83823	-0.00032		4.83504	-0.00016
4.84642	0.000135		4.84642	-0.00031		4.84323	-0.00015
4.85461	0.000111		4.85461	-0.00022		4.85142	-0.00015
4.8628	0.000108		4.8628	-0.00021		4.85961	-0.00015
4.87099	0.000104		4.87099	-0.00021		4.8678	-8.6e-05
4.87918	1.12e-05		4.87918	-0.00021		4.87599	7.52e-05
4.88736	1.08e-05		4.88736	-0.00021		4.88418	7.57e-05
4.89555	-1.4e-05		4.89555	-0.00023		4.89237	7.43e-05
4.90374	-3.9e-05		4.90374	-0.00026		4.90056	7.29e-05
4.91193	-0.00013		4.91193	-0.0003		4.90875	-4.6e-05
4.92012	-9.6e-05		4.92012	-0.00029		4.91694	-2.5e-05
4.92831	-6e-05		4.92831	-0.00029		4.92513	1.13e-05
4.9365	-6.1e-05		4.9365	-0.0003		4.93332	1.29e-05
4.94469	-6.3e-05		4.94469	-0.00031		4.94151	1.32e-05
4.95288	-6.7e-05		4.95288	-0.00033		4.9497	1.34e-05
4.96107	-7.5e-05		4.96107	-0.00028		4.95789	0.000203
4.96926	-4.7e-05		4.96926	-0.00022		4.96608	0.000312
4.97745	-4.5e-05		4.97745	-0.00022		4.97427	0.000599
4.98564	-4.4e-05		4.98564	-0.00023		4.98246	0.000573
4.99383	-2.3e-05		4.99383	-0.00023		4.99065	0.000547
5.00202	-2.8e-05		5.00202	-0.00026		4.99884	0.000494
5.01021	-3.4e-05		5.01021	-0.00026		5.00703	0.000525
5.0184	-5e-05		5.0184	-0.00025		5.01522	0.000518
5.02659	-7.9e-05		5.02659	-0.00023		5.02341	0.000512
5.03478	0.000231		5.03478	-0.00023		5.0316	0.000489
5.04297	0.000283		5.04297	-0.00022		5.03979	2.53e-05
5.05116	0.000289		5.05116	-0.00022		5.04798	8.79e-05
5.05935	0.000294		5.05935	-0.00021		5.05617	8.13e-05
5.06754	0.000359		5.06754	-0.00021		5.06436	7.48e-05
5.07573	0.00037		5.07573	-0.00021		5.07255	3.07e-05
5.08392	0.00037		5.08392	-0.00022		5.08074	-6.8e-05
5.09211	0.000166		5.09211	-0.00026		5.08893	-9.2e-05
5.1003	-3.8e-05		5.1003	-0.00027		5.09712	-0.00012
5.10849	-4.2e-05		5.10849	-0.00021		5.10531	-0.00019
5.11668	-4.6e-05		5.11668	-0.00021		5.1135	-6.4e-05
5.12487	-6.6e-05		5.12487	-0.0002		5.12169	0.000115
5.13306	-9.8e-05		5.13306	-0.00022		5.12988	0.000144
5.14125	-0.00017		5.14125	-0.00024		5.13807	0.000299
5.14944	-0.00015		5.14944	-0.00029		5.14626	0.00032
5.15763	-0.00013		5.15763	-0.00029		5.15444	0.000341
5.16582	-0.00011		5.16582	-0.00029		5.16263	0.00061
5.17401	-0.0001		5.17401	-0.00029		5.17082	0.000611
5.1822	-8.7e-05		5.1822	-0.0003		5.17901	0.00061
5.19039	-8.4e-05		5.19039	-0.0003		5.1872	0.00061
5.19858	-7.5e-05		5.19858	-0.0003		5.19539	0.000183
5.20677	-6.5e-05		5.20677	-0.00031		5.20358	5.1e-08
5.21496	-4.7e-05		5.21496	-0.00028		5.21177	-7e-05
5.22315	-1.2e-05		5.22315	-0.00028		5.21996	-7.2e-05
5.23134	-7e-06		5.23134	-0.00027		5.22815	7.29e-05
5.23953	-8.8e-06		5.23953	-0.00027		5.23634	0.00014
5.24772	-1.1e-05		5.24772	-0.00017		5.24453	0.000156
5.25591	-1.7e-05		5.25591	-6.7e-05		5.25272	2.79e-05
5.2641	-3e-05		5.2641	-6.3e-05		5.26091	-0.0001
5.27229	-8.1e-05		5.27229	-8e-05		5.2691	-0.00018
5.28048	-7.2e-05		5.28048	-9.8e-05		5.27729	-0.00012
5.28866	-7.4e-05		5.28866	-0.00018		5.28548	-5.8e-05
5.29685	-7.6e-05		5.29685	-0.00019		5.29367	-4.9e-05
5.30504	-8.3e-05		5.30504	-0.00011		5.30186	-4.9e-05
5.31323	-0.00011		5.31323	-9.9e-05		5.31005	-4.9e-05
5.32142	-9.7e-05		5.32142	-0.00011		5.31824	-4.1e-05
5.32961	-7.7e-05		5.32961	-0.00013		5.32643	-4.4e-05
5.3378	-7.5e-05		5.3378	-0.00016		5.33462	-4.7e-05
5.34599	-7.6e-05		5.34599	-0.00016		5.34281	-5.4e-05
5.35418	-7.6e-05		5.35418	-0.00016		5.351	-0.00017
5.36237	-7.6e-05		5.36237	-0.00027		5.35919	-0.00013
5.37056	-5.9e-05		5.37056	-0.00023		5.36738	-0.00013
5.37875	-5.6e-05		5.37875	-0.00023		5.37557	-0.00012
5.38694	-5.7e-05		5.38694	-0.00024		5.38376	-8.9e-05
5.39513	-5.7e-05		5.39513	-0.00024		5.39195	-8.7e-05
5.40332	-0.0001		5.40332	-0.00025		5.40014	-9.2e-05
5.41151	-9.7e-05		5.41151	-0.00027		5.40833	-9.7e-05
5.4197	-9.5e-05		5.4197	-0.00029		5.41652	-0.00018
5.42789	-9.3e-05		5.42789	-0.00022		5.42471	-0.00017
5.43608	-8.1e-05		5.43608	-0.00012		5.4329	-0.00017
5.44427	-6.8e-05		5.44427	-7.3e-05		5.44109	-0.00017
5.45246	-6.9e-05		5.45246	-9.4e-05		5.44928	-0.00017
5.46065	-7e-05		5.46065	-0.00012		5.45747	-0.0002
5.46884	-7.4e-05		5.46884	-0.00023		5.46566	-0.00012
5.47703	-0.00011		5.47703	-0.00025		5.47385	-0.00011
5.48522	0.000116		5.48522	-0.00021		5.48204	-0.00011
5.49341	0.000339		5.49341	-0.00016		5.49023	-0.00012
5.5016	0.000428		5.5016	-0.00016		5.49842	-0.00012
5.50979	0.000428		5.50979	-0.00016		5.50661	-8.4e-05
5.51798	0.000427		5.51798	-0.00016		5.5148	-3.4e-05
5.52617	-2.1e-05		5.52617	2.58e-05		5.52299	0.000322
5.53436	-8.6e-05		5.53436	0.000116		5.53118	0.000492
5.54255	6.13e-05		5.54255	0.000135		5.53937	0.000491
5.55074	9.84e-05		5.55074	0.000142		5.54756	0.000491
5.55893	9.66e-05		5.55893	0.000124		5.55574	0.000465
5.56712	9.48e-05		5.56712	0.000105		5.56393	0.000411
5.57531	3.08e-06		5.57531	-2.5e-05		5.57212	0.000259
5.5835	-5.3e-05		5.5835	-0.00016		5.58031	0.000197
5.59169	-5.7e-05		5.59169	-0.00016		5.5885	0.000133
5.59988	-6.1e-05		5.59988	-0.00018		5.59669	0.000109
5.60807	-0.0001		5.60807	-0.00023		5.60488	8.57e-05
5.61626	-0.00011		5.61626	-0.00023		5.61307	-0.0001
5.62445	-0.00011		5.62445	-0.00023		5.62126	-0.00014
5.63264	-0.00011		5.63264	-0.00024		5.62945	-0.00013
5.64083	-0.0001		5.64083	-0.00024		5.63764	-0.00012
5.64902	-0.0001		5.64902	-0.00026		5.64583	-0.00012
5.65721	-0.00011		5.65721	-0.00024		5.65402	-9.1e-05
5.6654	-0.00014		5.6654	-0.00023		5.66221	1.76e-05
5.67359	-0.00015		5.67359	-0.00024		5.6704	2.76e-05
5.68177	-0.00015		5.68177	-0.00026		5.67859	2.76e-05
5.68996	-0.00016		5.68996	-0.0003		5.68678	2.74e-05
5.69815	-0.00021		5.69815	-0.00028		5.69497	2.73e-05
5.70634	-0.00021		5.70634	-0.00028		5.70316	-7.9e-05
5.71453	-0.00021		5.71453	-0.00027		5.71135	-2.8e-05
5.72272	-0.00021		5.72272	-0.00027		5.71954	-1.7e-05
5.73091	-0.00014		5.73091	-0.00027		5.72773	-1.3e-05
5.7391	-0.00014		5.7391	-0.00027		5.73592	-5.2e-05
5.74729	-0.00014		5.74729	-0.00021		5.74411	-9.2e-05
5.75548	-0.00014		5.75548	-0.00018		5.7523	-0.00013
5.76367	-0.0002		5.76367	-0.00017		5.76049	-8.3e-05
5.77186	-0.00018		5.77186	-0.00017		5.76868	-6.3e-05
5.78005	-0.00017		5.78005	-0.00019		5.77687	-4.2e-05
5.78824	-0.00016		5.78824	-0.00021		5.78506	0.000192
5.79643	-0.00016		5.79643	-0.0002		5.79325	0.000202
5.80462	-0.00016		5.80462	-0.00019		5.80144	0.000201
5.81281	-5.3e-05		5.81281	-0.0002		5.80963	0.000199
5.821	0.000156		5.821	-0.0002		5.81782	0.000195
5.82919	0.000234		5.82919	-0.00021		5.82601	-4.6e-05
5.83738	0.000228		5.83738	-0.00023		5.8342	-7.4e-05
5.84557	0.000223		5.84557	-0.00027		5.84239	0.000341
5.85376	0.00019		5.85376	-0.00036		5.85058	0.00053
5.86195	4.61e-06		5.86195	-0.00023		5.85877	0.000512
5.87014	-0.0001		5.87014	-0.00023		5.86696	0.000493
5.87833	-0.00017		5.87833	-0.00023		5.87515	-8.4e-06
5.88652	-0.00017		5.88652	-0.00023		5.88334	-2.2e-05
5.89471	-0.00014		5.89471	-0.00026		5.89153	-3.6e-06
5.9029	-9e-05		5.9029	-0.00032		5.89972	1.79e-06
5.91109	-8.7e-05		5.91109	-0.00029		5.90791	2.82e-05
5.91928	-9e-05		5.91928	-0.00022		5.9161	2.91e-05
5.92747	-9.3e-05		5.92747	-0.00018		5.92429	2.5e-05
5.93566	-0.00016		5.93566	-0.00017		5.93248	2.09e-05
5.94385	-0.00016		5.94385	-0.00019		5.94067	4.97e-05
5.95204	-0.00016		5.95204	-0.00021		5.94886	0.000163
5.96023	-0.00017		5.96023	-0.00018		5.95704	0.000218
5.96842	-0.00019		5.96842	-0.00018		5.96523	0.000239
5.97661	-0.00021		5.97661	-0.00018		5.97342	0.000219
5.9848	-0.00015		5.9848	-0.00018		5.98161	0.000199
5.99299	-0.00011		5.99299	0.000162		5.9898	0.00018
6.00118	-0.0001		6.00118	0.000355		5.99799	0.000161
6.00937	-9.1e-05		6.00937	0.000375		6.00618	8.67e-05
6.01756	6.73e-05		6.01756	0.000358		6.01437	4.09e-05
6.02574	0.000291		6.02574	0.00034		6.02256	-0.00012
6.03393	0.000312		6.03393	0.000203		6.03075	-8.6e-05
6.04213	0.00031		6.04213	1.26e-05		6.03894	-7.2e-05
6.05032	0.000309		6.05032	-4.4e-05		6.04713	-6.7e-05
6.0585	0.000303		6.0585	3.17e-05		6.05532	-0.0001
6.06669	0.000289		6.06669	4.82e-05		6.06351	-0.00013
6.07488	0.00017		6.07488	6.46e-05		6.0717	-9.2e-05
6.08307	5e-05		6.08307	9.04e-05		6.07989	-5.8e-05
6.09126	-9.2e-05		6.09126	9.43e-05		6.08808	-5.5e-05
6.09945	-8.8e-05		6.09945	5.8e-05		6.09627	-5.5e-05
6.10764	-8.5e-05		6.10764	2.16e-05		6.10446	-5.9e-05
6.11583	0.000188		6.11583	-0.00016		6.11265	-6.4e-05
6.12402	0.000161		6.12402	-0.0002		6.12084	-8.4e-05
6.13221	0.000133		6.13221	-0.0002		6.12903	-0.00021
6.1404	5.68e-05		6.1404	-0.00021		6.13722	-0.00021
6.14859	-9.8e-05		6.14859	-0.00023		6.14541	-0.00022
6.15678	-6.2e-05		6.15678	-0.00029		6.1536	-0.00024
6.16497	-4.9e-05		6.16497	-0.0003		6.16179	-8.8e-05
6.17316	-4.4e-05		6.17316	-0.00027		6.16998	2.09e-05
6.18135	-3.8e-05		6.18135	-0.00027		6.17817	1.99e-05
6.18954	-4.2e-05		6.18954	-0.00024		6.18636	1.88e-05
6.19773	-4.5e-05		6.19773	-0.00017		6.19455	1.43e-05
6.20592	-5.4e-05		6.20592	-0.00013		6.20274	-9.7e-05
6.21411	-7.2e-05		6.21411	-0.00011		6.21093	-0.00015
6.2223	-4.8e-05		6.2223	-0.00011		6.21912	-0.00013
6.23049	-4.7e-05		6.23049	-0.00012		6.22731	-0.00013
6.23868	-4.8e-05		6.23868	-0.00029		6.2355	-0.00013
6.24687	-4.9e-05		6.24687	-0.00024		6.24369	-0.00013
6.25506	-5.4e-05		6.25506	-0.00019		6.25188	-0.00014
6.26325	-0.00012		6.26325	-0.00018		6.26007	-0.00014
6.27144	-7.2e-05		6.27144	-0.0002		6.26826	-0.00019
6.27963	9.83e-05		6.27963	-0.00022		6.27645	-0.00017
6.28782	0.00025		6.28782	-0.00027		6.28464	-0.00017
6.29601	0.000241		6.29601	-0.00027		6.29282	0.000102
6.3042	0.000233		6.3042	-0.00028		6.30101	0.000231
6.31239	0.000213		6.31239	-0.00028		6.30921	0.000277
6.32058	7.32e-05		6.32058	-0.00017		6.3174	0.000202
6.32877	-5.1e-05		6.32877	-0.00014		6.32559	0.000127
6.33696	-9.3e-05		6.33696	-0.00014		6.33377	-0.00012
6.34515	-0.00011		6.34515	-0.00015		6.34196	-0.00019
6.35334	-9.8e-05		6.35334	-0.00024		6.35015	-0.00025
6.36153	-9.8e-05		6.36153	-0.00017		6.35834	-0.00015
6.36972	-9.8e-05		6.36972	-0.00014		6.36653	4.84e-05
6.37791	-9.8e-05		6.37791	-0.00013		6.37472	0.000217
6.3861	-0.0001		6.3861	-0.00013		6.38291	0.000746
6.39429	-0.00014		6.39429	-0.00014		6.3911	0.000812
6.40247	-0.00011		6.40247	-0.00016		6.39929	0.000796
6.41066	-9.5e-05		6.41066	-0.00027		6.40748	0.000779
6.41885	-0.00011		6.41885	-0.00031		6.41567	0.000729
6.42704	-0.00012		6.42704	-0.00025		6.42386	0.000452
6.43523	-0.00015		6.43523	-0.00017		6.43205	-0.00012
6.44342	-0.00013		6.44342	-0.00013		6.44024	-0.00014
6.45161	-2e-05		6.45161	-0.00012		6.44843	-0.00019
6.4598	-6.6e-06		6.4598	-0.00011		6.45662	-0.00024
6.46799	-5e-06		6.46799	-0.00012		6.46481	-0.00018
6.47618	-5.9e-06		6.47618	-0.00012		6.473	-0.00014
6.48437	-6.7e-06		6.48437	-0.00022		6.48119	-0.00014
6.49256	-1.4e-05		6.49256	-0.00031		6.48938	-0.00014
6.50075	-0.00014		6.50075	-0.00032		6.49757	-0.00014
6.50894	-0.00013		6.50894	-0.0003		6.50576	-0.0001
6.51713	-0.00011		6.51713	-0.00029		6.51395	0.000223
6.52532	-7.7e-05		6.52532	-0.00028		6.52214	0.000441
6.53351	9.56e-06		6.53351	-0.00029		6.53033	0.000575
6.5417	0.000403		6.5417	-0.00029		6.53852	0.000578
6.54989	0.000591		6.54989	-0.00033		6.54671	0.000562
6.55808	0.000592		6.55808	-0.0003		6.5549	0.000545
6.56627	0.00059		6.56627	-0.00029		6.56309	-1.4e-06
6.57446	0.000589		6.57446	-0.00029		6.57128	-0.00014
6.58265	0.000586		6.58265	-0.00015		6.57947	-0.00014
6.59084	0.0005		6.59084	-9.7e-05		6.58766	-0.00015
6.59903	0.000306		6.59903	-0.0001		6.59585	9.1e-06
6.60722	-5.6e-06		6.60722	-0.0001		6.60404	3.83e-05
6.61541	-9.6e-05		6.61541	-0.00024		6.61223	4.65e-05
6.6236	-7.5e-05		6.6236	-0.00024		6.62042	3.31e-05
6.63179	-5.2e-05		6.63179	-0.00025		6.62861	1.97e-05
6.63998	-4.9e-05		6.63998	-0.00027		6.6368	4.44e-05
6.64817	-5e-05		6.64817	-0.00026		6.64499	5.51e-05
6.65636	-5.1e-05		6.65636	-0.00026		6.65318	6.59e-05
6.66455	-6.3e-05		6.66455	-0.00026		6.66137	8.19e-05
6.67274	-0.00011		6.67274	-0.00021		6.66956	8.91e-05
6.68093	-0.0001		6.68093	-0.00018		6.67774	8.18e-05
6.68912	-0.00011		6.68912	-0.00017		6.68593	7.45e-05
6.69731	-0.00011		6.69731	-0.00017		6.69412	5.68e-05
6.7055	-0.00012		6.7055	-0.00018		6.70231	-2.4e-05
6.71369	-0.00012		6.71369	-0.0002		6.7105	-0.00014
6.72188	-0.00013		6.72188	-0.0002		6.71869	-0.00014
6.73007	-0.00013		6.73007	-0.00021		6.72688	-0.00014
6.73826	-8.1e-05		6.73826	-0.00023		6.73507	-0.00014
6.74645	-6.4e-05		6.74645	-0.0003		6.74326	0.000113
6.75464	-1e-05		6.75464	-0.00031		6.75145	0.000165
6.76283	-1e-05		6.76283	-0.00028		6.75964	0.000185
6.77102	-1.1e-05		6.77102	-0.00028		6.76783	0.000205
6.77921	-1.2e-05		6.77921	-0.00028		6.77602	0.000302
6.7874	-9.3e-05		6.7874	-0.00029		6.78421	0.000302
6.79558	-9.2e-05		6.79558	-0.0003		6.7924	0.000297
6.80377	-8.8e-05		6.80377	-0.0003		6.80059	0.000293
6.81196	-4.8e-05		6.81196	-0.00027		6.80878	0.000266
6.82015	7.16e-05		6.82015	-0.00024		6.81697	0.000239
6.82834	0.000755		6.82834	-0.00021		6.82516	7.36e-05
6.83653	0.000772		6.83653	-0.00017		6.83335	-5.3e-05
6.84472	0.000646		6.84472	-0.00017		6.84154	-0.00018
6.85291	0.00052		6.85291	-0.00017		6.84973	-0.00019
6.8611	-4e-05		6.8611	-0.00017		6.85792	-0.00018
6.86929	-3.3e-05		6.86929	-0.00018		6.86611	-0.00017
6.87748	-3.2e-05		6.87748	-0.00027		6.8743	-0.00017
6.88567	-4e-05		6.88567	-0.00028		6.88249	-0.00016
6.89386	-4.8e-05		6.89386	-0.00028		6.89068	-0.00016
6.90205	0.000351		6.90205	-0.00029		6.89887	-0.00015
6.91024	0.000344		6.91024	-0.0003		6.90706	-0.00011
6.91843	0.000337		6.91843	-0.00031		6.91525	-0.00011
6.92662	0.00032		6.92662	-0.00031		6.92344	-0.00011
6.93481	7.12e-05		6.93481	-0.00032		6.93163	-8.3e-05
6.943	-0.00012		6.943	-0.00032		6.93982	-8.5e-05
6.95119	-0.0001		6.95119	-0.00031		6.94801	-8.6e-05
6.95938	-7.4e-05		6.95938	-0.0003		6.9562	-9e-05
6.96757	-7.2e-05		6.96757	-0.00029		6.96439	-9.7e-05
6.97576	-7.3e-05		6.97576	-0.00028		6.97258	-0.00021
6.98395	-7.5e-05		6.98395	-0.0002		6.98077	-0.0002
6.99214	-8.6e-05		6.99214	-4.9e-05		6.98896	-0.00019
7.00033	0.000108		7.00033	2.08e-05		6.99715	-0.00016
7.00852	0.000107		7.00852	3e-05		7.00534	-0.00015
7.01671	0.000106		7.01671	-0.00011		7.01353	-0.00015
7.0249	0.0001		7.0249	-0.00025		7.02172	-0.00014
7.03309	5.37e-06		7.03309	-0.00024		7.02991	-0.00013
7.04128	-9.4e-05		7.04128	-0.00023		7.0381	-3.7e-05
7.04947	-0.00017		7.04947	-0.00021		7.04629	-1.3e-05
7.05766	-0.00019		7.05766	-0.00021		7.05448	-7.2e-07
7.06585	-0.00011		7.06585	-0.00021		7.06266	-4.8e-06
7.07404	-9.8e-05		7.07404	-0.00021		7.07085	-8.9e-06
7.08223	-0.0001		7.08223	-0.00021		7.07904	-2.3e-05
7.09042	-0.00011		7.09042	-0.00023		7.08723	-5.2e-05
7.09861	-0.00011		7.09861	-0.0003		7.09542	-0.00011
7.1068	-8.9e-05		7.1068	-0.00028		7.10361	-9.6e-05
7.11499	-7.8e-05		7.11499	-0.00028		7.1118	-3.1e-05
7.12318	1.91e-05		7.12318	-0.00027		7.11999	-3.3e-05
7.13137	1.79e-05		7.13137	-0.00027		7.12818	-3.5e-05
7.13956	1.67e-05		7.13956	-0.00028		7.13637	-4.2e-05
7.14775	-2.7e-05		7.14775	-0.00028		7.14456	-8e-05
7.15594	-0.00018		7.15594	-0.0003		7.15275	-0.0001
7.16413	-0.00015		7.16413	-0.00031		7.16094	-0.00012
7.17232	-0.00013		7.17232	-0.00031		7.16913	-0.00017
7.18051	-0.00012		7.18051	-0.0003		7.17732	-0.00022
7.1887	-4.7e-06		7.1887	-0.00026		7.18551	-8e-05
7.19688	2.74e-06		7.19688	-0.00025		7.1937	8.16e-05
7.20507	3.68e-06		7.20507	-0.00025		7.20189	0.000112
7.21326	-3.4e-06		7.21326	-0.00025		7.21008	0.000144
7.22145	-1e-05		7.22145	-0.00025		7.21827	0.000143
7.22964	-4.4e-05		7.22964	-0.00025		7.22646	0.000142
7.23783	-0.00014		7.23783	-0.00026		7.23465	0.00014
7.24602	-0.00013		7.24602	-0.00027		7.24284	0.000134
7.25421	-0.00012		7.25421	-0.0003		7.25103	0.00012
7.2624	-0.00012		7.2624	-0.00031		7.25922	7.04e-05
7.27059	-0.00011		7.27059	-0.00032		7.26741	-1.9e-05
7.27878	-7.6e-05		7.27878	-0.00033		7.2756	7.54e-05
7.28697	-7e-05		7.28697	-0.0003		7.28379	9.62e-05
7.29516	-6.7e-05		7.29516	-0.00018		7.29198	9.83e-05
7.30335	-6.9e-05		7.30335	-0.00018		7.30017	9.73e-05
7.31154	-7e-05		7.31154	-0.0002		7.30836	9.62e-05
7.31973	-7.3e-05		7.31973	-0.00022		7.31655	5.13e-05
7.32792	-8e-05		7.32792	-0.00033		7.32474	-0.00017
7.33611	-8.8e-05		7.33611	-0.00024		7.33293	-0.0002
7.3443	0.000262		7.3443	-0.00021		7.34112	-6.8e-05
7.35249	0.000411		7.35249	-0.0002		7.34931	2.81e-05
7.36068	0.000502		7.36068	-0.0002		7.3575	6.33e-05
7.36887	0.000471		7.36887	-0.00019		7.36569	4.89e-05
7.37706	0.00044		7.37706	-0.00018		7.37388	3.46e-05
7.38525	0.000359		7.38525	-4.2e-05		7.38207	-1.1e-05
7.39344	6.6e-05		7.39344	2.28e-05		7.39026	-0.00011
7.40163	0.00011		7.40163	4.59e-06		7.39845	-0.00014
7.40982	0.00072		7.40982	-1.4e-05		7.40664	-6.8e-05
7.41801	0.000759		7.41801	-0.00028		7.41483	-3e-05
7.4262	0.000671		7.4262	-0.00028		7.42302	-1.4e-05
7.43439	0.000583		7.43439	-0.00028		7.43121	2.43e-06
7.44258	0.000135		7.44258	-0.00029		7.4394	0.000404
7.45077	-0.00014		7.45077	-0.00031		7.44759	0.000447
7.45896	-0.00014		7.45896	-0.00026		7.45578	0.000413
7.46715	-0.00012		7.46715	-0.00024		7.46396	0.000378
7.47534	-0.00011		7.47534	-0.00025		7.47215	7.97e-05
7.48353	-0.00011		7.48353	-0.00025		7.48034	3.88e-05
7.49172	-0.00011		7.49172	-0.00027		7.48853	-2.3e-05
7.49991	-0.0001		7.49991	-0.00028		7.49672	-9e-05
7.5081	-1.5e-05		7.5081	-0.00027		7.50491	-4e-05
7.51629	7.31e-05		7.51629	-0.00026		7.5131	0.000274
7.52448	0.000113		7.52448	-0.00017		7.52129	0.000838
7.53266	0.000122		7.53266	-0.00016		7.52948	0.000846
7.54085	8.94e-05		7.54085	-0.00017		7.53767	0.000848
7.54904	5.63e-05		7.54904	-0.00017		7.54586	0.000702
7.55724	-1e-05		7.55724	-0.00026		7.55405	0.000555
7.56543	-5.3e-05		7.56543	-0.00031		7.56224	0.000518
7.57361	-9.6e-05		7.57361	-0.00028		7.57043	0.00048
7.5818	-0.00013		7.5818	-0.00027		7.57862	0.00012
7.58999	0.000244		7.58999	-0.00027		7.58681	3.52e-05
7.59818	0.00042		7.59818	-0.00026		7.595	3.02e-05
7.60637	0.000425		7.60637	-0.00025		7.60319	2.51e-05
7.61456	0.000348		7.61456	-0.00025		7.61138	1.32e-05
7.62275	0.00027		7.62275	-0.00015		7.61957	1.3e-06
7.63094	0.000115		7.63094	-6.1e-05		7.62776	-5.7e-05
7.63913	4.21e-06		7.63913	7.12e-06		7.63595	-1.6e-05
7.64732	-9.5e-05		7.64732	4.73e-05		7.64414	-1.8e-06
7.65551	-0.0001		7.65551	2.57e-05		7.65233	-1.2e-06
7.6637	-0.00011		7.6637	4.24e-06		7.66052	-1.6e-05
7.67189	-0.00015		7.67189	-4.5e-05		7.66871	-3e-05
7.68008	-0.00015		7.68008	-0.00029		7.6769	-0.00018
7.68827	-0.00015		7.68827	-0.00033		7.68509	-0.00013
7.69646	-9e-05		7.69646	-0.00034		7.69328	-0.00013
7.70465	-3.4e-05		7.70465	-0.0003		7.70147	-0.00013
7.71284	-3.3e-05		7.71284	-0.00026		7.70966	-0.00016
7.72103	-3.3e-05		7.72103	-0.00024		7.71785	-0.0002
7.72922	-3.4e-05		7.72922	-0.00025		7.72604	-0.00022
7.73741	-6.2e-05		7.73741	-0.00026		7.73423	-0.00018
7.7456	-2.6e-05		7.7456	-0.00028		7.74242	-0.00016
7.75379	4.39e-06		7.75379	-0.0001		7.75061	-0.00015
7.76198	1.87e-05		7.76198	-6e-05		7.7588	-0.00015
7.77017	1.45e-05		7.77017	-6e-05		7.76699	-6.5e-05
7.77836	1.04e-05		7.77836	-6.1e-05		7.77518	5.24e-05
7.78655	-2.9e-07		7.78655	-6.8e-05		7.78337	0.00011
7.79474	-7e-05		7.79474	-8.6e-05		7.79156	0.000114
7.80293	-0.00013		7.80293	-0.0001		7.79975	5.86e-05
7.81112	-0.00011		7.81112	-0.00012		7.80794	3.02e-06
7.81931	0.000151		7.81931	-0.00026		7.81613	4.63e-06
7.8275	0.000201		7.8275	-0.00028		7.82432	1.97e-05
7.83569	0.00015		7.83569	-0.0003		7.83251	1.55e-05
7.84388	9.87e-05		7.84388	-0.00025		7.8407	1.13e-05
7.85207	-2.5e-05		7.85207	-5.3e-06		7.84889	-5.6e-05
7.86026	-6.8e-05		7.86026	9.86e-05		7.85707	-0.0002
7.86845	4.4e-05		7.86845	1.03e-05		7.86526	-0.0002
7.87664	7.03e-05		7.87664	-7.8e-05		7.87345	-0.0002
7.88483	8.1e-05		7.88483	-0.00026		7.88164	-0.00021
7.89302	7.14e-05		7.89302	-0.0003		7.88983	-0.00025
7.90121	6.18e-05		7.90121	-0.00025		7.89802	-0.00016
7.9094	-0.00013		7.9094	-0.00025		7.90621	-7.3e-05
7.91758	-0.00015		7.91758	-0.00025		7.9144	-4.6e-05
7.92577	-0.00014		7.92577	-0.00025		7.92259	-1.9e-05
7.93396	-0.00012		7.93396	-0.00025		7.93078	3.34e-05
7.94215	-0.00012		7.94215	4.2e-06		7.93897	0.000134
7.95034	-0.00013		7.95034	9.53e-05		7.94716	0.000256
7.95853	-0.00013		7.95853	0.000109		7.95535	0.000266
7.96672	-0.00014		7.96672	0.000112		7.96354	0.000252
7.97491	-0.00017		7.97491	9.8e-05		7.97173	0.000238
7.9831	-0.00015		7.9831	8.4e-05		7.97992	-5.4e-05
7.99129	-0.00014		7.99129	1.67e-05		7.98811	-0.00012
7.99948	-0.00014		7.99948	-7.1e-07		7.9963	-0.00016
8.00767	0.000493		8.00767	-1.8e-05		8.00449	-0.00014
8.01586	0.000574		8.01586	-0.0001		8.01268	-0.00014
8.02405	0.000612		8.02405	-0.00016		8.02087	-0.00014
8.03224	0.000611		8.03224	-0.00022		8.02906	-0.00016
8.04043	0.000611		8.04043	-0.00033		8.03725	-0.00019
8.04862	0.000594		8.04862	-0.00033		8.04544	-7.3e-05
8.05681	3.45e-05		8.05681	-0.00033		8.05363	6.15e-05
8.065	-0.00019		8.065	-0.00033		8.06182	0.000202
8.07319	-0.00019		8.07319	-0.00037		8.07001	0.000231
8.08138	-0.00019		8.08138	-0.00026		8.0782	0.000243
8.08957	-0.0002		8.08957	-0.00026		8.08639	0.000228
8.09776	5.89e-07		8.09776	-0.00026		8.09458	0.000214
8.10595	9.59e-05		8.10595	-0.0002		8.10277	0.000125
8.11414	6.7e-05		8.11414	-0.00019		8.11096	3.64e-05
8.12233	3.81e-05		8.12233	-0.00019		8.11915	2.2e-05
8.13052	-5.2e-05		8.13052	0.000246		8.12734	7.67e-06
8.13871	-5.3e-05		8.13871	0.00025		8.13553	1.25e-06
8.1469	-5.4e-05		8.1469	0.000212		8.14372	-5.2e-06
8.15509	-5.5e-05		8.15509	0.000174		8.15191	-2.1e-05
8.16328	-6.9e-05		8.16328	-2.5e-05		8.1601	-9.3e-05
8.17147	-0.00015		8.17147	-0.00016		8.16829	-8.7e-05
8.17966	-0.00017		8.17966	-0.00032		8.17648	-8.7e-05
8.18785	-0.00013		8.18785	-0.00029		8.18467	-8.7e-05
8.19604	-4e-05		8.19604	-0.00028		8.19285	-9e-05
8.20423	-2.8e-05		8.20423	-0.00028		8.20105	-0.00021
8.21242	-1.6e-05		8.21242	-0.00029		8.20923	-5e-05
8.22061	-1.5e-05		8.22061	-0.00029		8.21743	0.000551
8.2288	-1.4e-05		8.2288	-0.00031		8.22561	0.00053
8.23699	3.76e-06		8.23699	-0.00031		8.2338	0.000508
8.24518	7.14e-06		8.24518	-0.0003		8.24199	0.000461
8.25337	-1.9e-06		8.25337	-0.00016		8.25018	0.00021
8.26156	-1.1e-05		8.26156	-0.00014		8.25837	8.14e-05
8.26975	-3.1e-05		8.26975	-0.00016		8.26656	8.56e-05
8.27794	-8.4e-05		8.27794	-0.00018		8.27475	8.5e-05
8.28613	-7.7e-05		8.28613	-0.00022		8.28294	8.44e-05
8.29431	4.4e-05		8.29431	-0.00024		8.29113	8.25e-05
8.30251	5e-05		8.30251	-0.00022		8.29932	7.8e-05
8.3107	4.74e-05		8.3107	-0.00021		8.30751	6.27e-05
8.31888	4.48e-05		8.31888	-0.00022		8.3157	6.25e-05
8.32708	1.3e-05		8.32708	-0.00022		8.32389	6.23e-05
8.33526	-7.5e-05		8.33526	-0.00027		8.33208	6.17e-05
8.34345	-0.00011		8.34345	-0.00025		8.34027	-3.3e-05
8.35164	-0.00013		8.35164	-0.00023		8.34846	-0.00013
8.35983	-0.00015		8.35983	-0.00022		8.35665	-0.00018
8.36802	-0.00015		8.36802	-0.00022		8.36484	-0.00018
8.37621	-0.00016		8.37621	-0.00026		8.37303	-0.00013
8.3844	-6.5e-05		8.3844	-0.00031		8.38122	-8.2e-05
8.39259	2.21e-05		8.39259	-0.00033		8.38941	-3.5e-05
8.40078	4.12e-05		8.40078	-0.00034		8.3976	-1.5e-05
8.40897	4.92e-05		8.40897	-0.00035		8.40579	-1.9e-05
8.41716	5.71e-05		8.41716	-0.00034		8.41398	-2.4e-05
8.42535	0.000188		8.42535	-0.00033		8.42217	-4.1e-05
8.43354	0.00028		8.43354	-0.00033		8.43036	-7.7e-05
8.44173	0.000293		8.44173	-0.00033		8.43855	-7.8e-05
8.44992	0.000196		8.44992	-0.00034		8.44674	-7.8e-05
8.45811	9.85e-05		8.45811	-0.00029		8.45493	-8.1e-05
8.4663	-9.8e-05		8.4663	-0.00028		8.46312	-9.7e-05
8.47449	-0.00011		8.47449	-0.00028		8.47131	-0.00015
8.48268	-0.00012		8.48268	-0.00028		8.4795	-0.00014
8.49087	0.000303		8.49087	-0.00029		8.48769	-0.00014
8.49906	0.000465		8.49906	-0.00031		8.49588	-0.00013
8.50725	0.000473		8.50725	-0.00029		8.50407	-4e-05
8.51544	0.000267		8.51544	-6.2e-05		8.51226	8.05e-06
8.52363	6.05e-05		8.52363	0.000161		8.52045	0.000287
8.53182	-5.6e-05		8.53182	0.000265		8.52864	0.000425
8.54001	-8.9e-05		8.54001	0.0003		8.53683	0.000317
8.5482	-0.0001		8.5482	0.00024		8.54502	0.000209
8.55639	-0.00011		8.55639	0.000181		8.55321	-6.4e-05
8.56458	-0.00013		8.56458	-0.00015		8.5614	-7.8e-05
8.57277	-0.00013		8.57277	-0.00031		8.56959	-4.6e-05
8.58096	-0.00013		8.58096	-0.00029		8.57778	4.84e-05
8.58915	-0.00013		8.58915	-0.00028		8.58596	4.96e-05
8.59734	-0.00014		8.59734	-0.00028		8.59416	4.85e-05
8.60553	-0.00012		8.60553	-0.00028		8.60234	4.75e-05
8.61372	-0.00012		8.61372	-0.00028		8.61053	-5.7e-05
8.62191	-0.00012		8.62191	-0.00012		8.61872	-0.00011
8.6301	-0.00012		8.6301	-7.9e-05		8.62691	-0.00012
8.63829	-0.00013		8.63829	-6.3e-05		8.6351	-0.00012
8.64648	-0.00011		8.64648	-4.7e-05		8.64329	-0.00012
8.65467	-0.0001		8.65467	6.41e-05		8.65148	-0.00012
8.66286	-0.0001		8.66286	0.000118		8.65967	-0.00012
8.67104	-9.6e-05		8.67104	6.1e-06		8.66786	-0.00012
8.67924	-7.8e-05		8.67924	-0.00011		8.67605	-0.00015
8.68742	0.00021		8.68742	-0.00034		8.68424	-0.00022
8.69562	0.000681		8.69562	-0.00033		8.69243	-0.00022
8.7038	0.000799		8.7038	-0.00032		8.70062	-0.00023
8.71199	0.000715		8.71199	-0.00032		8.70881	-0.00023
8.72018	0.000632		8.72018	-0.00032		8.717	-0.00019
8.72837	0.000461		8.72837	-0.00028		8.72519	-5.4e-05
8.73656	0.000119		8.73656	-0.00021		8.73338	7.9e-06
8.74475	4.9e-05		8.74475	9.42e-05		8.74157	3.83e-05
8.75294	-5.8e-05		8.75294	0.000148		8.74976	4.39e-05
8.76113	-5.9e-05		8.76113	0.000168		8.75795	-1.9e-05
8.76932	-6.1e-05		8.76932	8.47e-05		8.76614	-8.3e-05
8.77751	-6.9e-05		8.77751	1.06e-06		8.77433	-0.00018
8.7857	-0.00011		8.7857	0.000195		8.78252	-0.00016
8.79389	-0.00018		8.79389	0.000197		8.79071	-0.00014
8.80208	-0.00015		8.80208	0.000197		8.7989	-0.00013
8.81027	-0.00013		8.81027	0.000184		8.80709	-8.6e-05
8.81846	-0.00013		8.81846	0.000171		8.81528	3.48e-05
8.82665	-0.00014		8.82665	-0.00018		8.82347	0.000187
8.83484	-0.00015		8.83484	-0.00023		8.83166	0.000263
8.84303	-0.00019		8.84303	-0.00021		8.83985	0.00028
8.85122	-0.00019		8.85122	-0.00021		8.84804	0.000153
8.85941	-0.00019		8.85941	-0.00021		8.85623	2.67e-05
8.8676	-0.00019		8.8676	-0.00021		8.86442	-1.9e-05
8.87579	-0.00019		8.87579	-0.0002		8.87261	-2.2e-05
8.88398	-0.00014		8.88398	-0.00021		8.8808	-2.4e-05
8.89217	-9.5e-05		8.89217	-0.00022		8.88899	-3.6e-05
8.90036	-9.4e-05		8.90036	-0.00025		8.89718	-0.00013
8.90855	-0.00011		8.90855	0.000445		8.90537	-9.1e-05
8.91674	-0.00012		8.91674	0.000624		8.91356	-8.5e-05
8.92493	-0.00014		8.92493	0.000624		8.92175	-8.3e-05
8.93312	-0.00016		8.93312	0.000623		8.92994	-0.0001
8.94131	-0.00013		8.94131	0.000609		8.93813	-0.00013
8.9495	-0.00011		8.9495	0.000245		8.94632	-0.00015
8.95769	-9.8e-05		8.95769	-0.00025		8.9545	-7.2e-05
8.96588	-3.7e-05		8.96588	-0.00033		8.9627	-3.7e-05
8.97407	5.88e-05		8.97407	-0.00034		8.97089	-3e-05
8.98226	0.000597		8.98226	-0.00035		8.97907	-2.2e-05
8.99045	0.000839		8.99045	-0.00035		8.98727	-1.3e-05
8.99864	0.000611		8.99864	-0.00033		8.99545	1.86e-05
9.00683	0.000384		9.00683	-0.00032		9.00364	2.33e-05
9.01502	-0.00012		9.01502	-0.00033		9.01183	2.34e-05
9.02321	-0.00012		9.02321	-0.00033		9.02002	-2.3e-05
9.0314	-9.5e-05		9.0314	-0.00037		9.02821	-6.9e-05
9.03959	-8.6e-05		9.03959	-0.00037		9.0364	-0.00012
9.04777	-8.2e-05		9.04777	-0.00036		9.04459	-0.00018
9.05597	-8.1e-05		9.05597	-0.00035		9.05278	-0.00022
9.06415	-8.4e-05		9.06415	-4.3e-05		9.06097	-0.00017
9.07235	-8.6e-05		9.07235	-4.7e-05		9.06916	-0.00015
9.08053	-0.00012		9.08053	-5.1e-05		9.07735	-0.00016
9.08872	-2.1e-05		9.08872	-8.8e-05		9.08554	-0.00017
9.09691	1.26e-05		9.09691	-0.00018		9.09373	-0.00021
9.1051	4.63e-05		9.1051	-0.00013		9.10192	-0.00025
9.11329	5.47e-05		9.11329	-0.00014		9.11011	-0.00026
9.12148	1.52e-05		9.12148	-0.00014		9.1183	-0.00019
9.12967	-2.4e-05		9.12967	-0.00016		9.12649	-0.00018
9.13786	-0.00011		9.13786	-0.00034		9.13468	-3.8e-05
9.14605	-0.00011		9.14605	-0.00036		9.14287	-1.7e-05
9.15424	-0.00012		9.15424	-0.00031		9.15106	-6.5e-06
9.16243	-0.00013		9.16243	-0.00026		9.15925	-7.4e-05
9.17062	-0.00016		9.17062	-0.00023		9.16744	-0.00014
9.17881	-0.00019		9.17881	-0.00023		9.17563	-0.00014
9.187	-0.00019		9.187	-0.00023		9.18382	-0.00012
9.19519	-0.00017		9.19519	-0.00023		9.19201	-0.0001
9.20338	-0.00017		9.20338	-0.00023		9.2002	-0.0001
9.21157	-0.00016		9.21157	-0.00024		9.20839	-9.9e-05
9.21976	-0.00016		9.21976	-0.00028		9.21658	-8.4e-05
9.22795	-0.00017		9.22795	-0.00036		9.22477	-5.9e-05
9.23614	-0.00018		9.23614	-0.00035		9.23296	-5.9e-05
9.24433	-0.00019		9.24433	-0.00011		9.24115	-5.9e-05
9.25252	-0.00016		9.25252	-5.9e-06		9.24934	-5.9e-05
9.26071	-0.00011		9.26071	-1e-05		9.25753	-7.9e-05
9.2689	-3.5e-05		9.2689	-1.5e-05		9.26572	-0.00025
9.27709	-3e-05		9.27709	-2.9e-05		9.27391	-0.00034
9.28528	-3.2e-05		9.28528	-5.9e-05		9.2821	-0.00017
9.29347	-3.3e-05		9.29347	-0.00012		9.29029	-0.00013
9.30166	-5.1e-05		9.30166	-0.00025		9.29848	-0.00011
9.30985	-0.00019		9.30985	-0.00033		9.30667	-9.6e-05
9.31804	-0.00019		9.31804	-0.0003		9.31486	-1.1e-05
9.32623	-0.00019		9.32623	-0.00026		9.32305	9.54e-05
9.33442	-0.0002		9.33442	-0.00025		9.33123	0.000144
9.34261	-0.0002		9.34261	-0.00024		9.33943	0.000144
9.3508	-0.00021		9.3508	-0.00023		9.34761	0.000143
9.35899	-0.00021		9.35899	-0.0002		9.35581	3.24e-05
9.36718	-0.00021		9.36718	-0.00018		9.36399	-7.6e-05
9.37537	-0.00021		9.37537	-0.00019		9.37218	-7e-05
9.38356	-0.00019		9.38356	-0.00019		9.38037	-7.1e-05
9.39175	-0.00014		9.39175	-0.00021		9.38856	-7.2e-05
9.39994	-0.00014		9.39994	-0.00023		9.39675	-7.6e-05
9.40813	0.000281		9.40813	-0.00023		9.40494	-8.3e-05
9.41632	0.000482		9.41632	-0.00023		9.41313	-0.00018
9.42451	0.000556		9.42451	-0.00023		9.42132	-0.00018
9.4327	0.000568		9.4327	-0.0003		9.42951	-0.00017
9.44088	0.000512		9.44088	-0.00038		9.4377	-0.00015
9.44908	0.000456		9.44908	-0.00039		9.44589	-0.00015
9.45726	0.000208		9.45726	-0.00039		9.45408	-0.00016
9.46545	-7.2e-05		9.46545	-0.00039		9.46227	-0.00016
9.47364	-8.3e-05		9.47364	-0.00041		9.47046	-0.0002
9.48183	-0.00014		9.48183	-0.00034		9.47865	-0.00024
9.49002	-0.00014		9.49002	-0.00019		9.48684	-0.00017
9.49821	-0.00014		9.49821	-0.0002		9.49503	-0.00014
9.5064	-0.00015		9.5064	-0.00021		9.50322	-0.00016
9.51459	-0.0002		9.51459	-0.00027		9.51141	-0.00018
9.52278	-0.00016		9.52278	-0.00041		9.5196	-0.00022
9.53097	-0.00014		9.53097	-0.00038		9.52779	-0.0002
9.53916	-0.00014		9.53916	-0.00037		9.53598	-0.00021
9.54735	-0.00014		9.54735	-0.00037		9.54417	-0.00022
9.55554	-0.00015		9.55554	-0.00026		9.55236	-0.00023
9.56373	-0.00016		9.56373	-0.00023		9.56055	-0.0003
9.57192	-0.00018		9.57192	-0.00023		9.56874	-0.0003
9.58011	-0.00018		9.58011	-0.00023		9.57693	-0.0003
9.5883	-0.00019		9.5883	-0.00024		9.58512	-0.0003
9.59649	-0.0002		9.59649	-0.00015		9.59331	-0.00026
9.60468	-0.0002		9.60468	-5.1e-05		9.6015	-0.00024
9.61287	-0.00016		9.61287	-9.5e-05		9.60969	-0.00024
9.62106	-0.00014		9.62106	-0.00014		9.61788	-0.00024
9.62925	-0.00014		9.62925	-0.00024		9.62607	-0.00024
9.63744	-0.00014		9.63744	-0.00027		9.63426	-0.00024
9.64563	-0.00014		9.64563	-0.00034		9.64245	-0.00025
9.65382	-0.00016		9.65382	-0.00036		9.65064	-0.00015
9.66201	-0.00017		9.66201	-0.00024		9.65883	-0.00013
9.6702	-0.00011		9.6702	-0.00022		9.66702	-0.00013
9.67839	-8.6e-05		9.67839	-0.00024		9.67521	-0.00013
9.68658	-6.6e-05		9.68658	-0.00026		9.6834	-0.00013
9.69477	-6.1e-05		9.69477	-0.0003		9.69159	-0.0001
9.70296	-5.9e-05		9.70296	-0.00033		9.69978	5.6e-05
9.71115	-6.6e-05		9.71115	-0.00037		9.70797	0.001149
9.71934	-7.3e-05		9.71934	-0.00044		9.71616	0.001251
9.72753	-8.7e-05		9.72753	-0.00038		9.72434	0.001139
9.73572	-0.00016		9.73572	-0.00035		9.73254	0.001027
9.74391	-0.00016		9.74391	-0.00033		9.74072	0.000316
9.7521	-0.00016		9.7521	-0.00033		9.74891	0.000223
9.76029	-0.00016		9.76029	-0.00032		9.7571	0.000131
9.76848	-0.00017		9.76848	-0.0003		9.76529	-0.00013
9.77667	-0.00021		9.77667	-0.00029		9.77348	-0.00016
9.78486	-0.00023		9.78486	-0.0003		9.78167	-9.8e-05
9.79305	-0.00021		9.79305	-0.00031		9.78986	-8.5e-05
9.80124	-0.00019		9.80124	-0.00033		9.79805	-8e-05
9.80942	-0.00014		9.80942	-0.00032		9.80624	-8e-05
9.81761	-0.00011		9.81761	-0.00032		9.81443	-8e-05
9.82581	-0.00011		9.82581	-0.00032		9.82262	-8.1e-05
9.83399	-0.00012		9.83399	-0.00027		9.83081	-0.00014
9.84218	-0.00012		9.84218	-0.00025		9.839	-0.00018
9.85037	-0.00012		9.85037	-0.00022		9.84719	-0.00011
9.85856	-0.00013		9.85856	-0.00021		9.85538	-0.00011
9.86675	-2.9e-05		9.86675	-0.0002		9.86357	-0.00011
9.87494	-3.4e-05		9.87494	-0.00021		9.87176	0.000215
9.88313	-3.9e-05		9.88313	-0.00023		9.87995	0.000188
9.89132	-6.4e-05		9.89132	-0.00027		9.88814	0.00016
9.89951	-0.00012		9.89951	-0.00034		9.89633	7.59e-05
9.9077	-0.00019		9.9077	-0.00033		9.90452	-0.0001
9.91589	-0.0002		9.91589	-0.00033		9.91271	-0.0002
9.92408	-0.00021		9.92408	-0.00034		9.9209	-0.00013
9.93227	-0.00023		9.93227	-0.0004		9.92909	-0.00011
9.94046	-0.00015		9.94046	-0.00037		9.93728	-9.3e-05
9.94865	-0.00014		9.94865	-0.00027		9.94547	-8.1e-05
9.95684	-0.00014		9.95684	-0.00025		9.95366	-9.6e-06
9.96503	-0.00014		9.96503	-0.00028		9.96185	-1e-05
9.97322	-0.00014		9.97322	-0.00031		9.97004	-1e-05
9.98141	-0.00017		9.98141	-0.00037		9.97823	-1.6e-05
9.9896	-0.00018		9.9896	-0.00039		9.98642	-3.2e-05
9.99779	-0.00018		9.99779	-0.00031		9.99461	-9.1e-05
10.006	-0.00017		10.006	-0.00026		10.0028	-0.00013
10.0142	-0.00014		10.0142	-0.00024		10.011	-0.00017
10.0224	7.95e-05		10.0224	-0.00019		10.0192	-0.00018
10.0305	0.000113		10.0305	-0.00016		10.0274	-5e-05
10.0387	0.000108		10.0387	-0.0002		10.0356	-2.5e-05
10.0469	0.000104		10.0469	-0.00023		10.0437	-1.8e-05
10.0551	9.23e-05		10.0551	-0.00031		10.0519	-3.2e-05
10.0633	-2e-05		10.0633	-0.00031		10.0601	-4.7e-05
10.0715	-0.00013		10.0715	-0.00031		10.0683	-6.4e-05
10.0797	-0.0002		10.0797	-0.00032		10.0765	-9.1e-05
10.0879	-0.00023		10.0879	-0.00033		10.0847	-0.00018
10.0961	-0.00022		10.0961	-0.00033		10.0929	-0.00027
10.1043	-0.00018		10.1043	-0.00033		10.1011	-0.00026
10.1125	-0.00017		10.1125	-0.00034		10.1093	-0.00019
10.1206	-0.00015		10.1206	-0.00028		10.1174	-0.00016
10.1288	-0.00015		10.1288	-0.00029		10.1256	-0.00014
10.137	-0.00015		10.137	-0.00029		10.1338	-0.00014
10.1452	-0.00015		10.1452	-0.00029		10.142	-0.00017
10.1534	-0.00016		10.1534	-0.00035		10.1502	-0.0002
10.1616	-0.00014		10.1616	-0.00035		10.1584	-0.00022
10.1698	-0.00014		10.1698	-0.00035		10.1666	-0.00016
10.178	-0.00014		10.178	-0.00036		10.1748	-0.00015
10.1862	-0.00014		10.1862	-0.00036		10.183	-0.00014
10.1944	-9.6e-05		10.1944	-0.00037		10.1912	-6.8e-05
10.2025	-5.1e-05		10.2025	-0.00037		10.1994	0.000157
10.2107	5.82e-05		10.2107	-0.00038		10.2075	0.000257
10.2189	7.64e-05		10.2189	-0.00039		10.2157	0.000263
10.2271	7.8e-05		10.2271	-0.00038		10.2239	0.000174
10.2353	5.59e-05		10.2353	-0.00037		10.2321	8.45e-05
10.2435	3.38e-05		10.2435	-0.00033		10.2403	-0.00026
10.2517	-0.00015		10.2517	-0.00033		10.2485	-0.00031
10.2599	-0.00013		10.2599	-0.00033		10.2567	-0.00026
10.2681	-0.00013		10.2681	-0.00033		10.2649	-0.00023
10.2762	-0.00013		10.2762	-0.00035		10.2731	-0.00022
10.2844	-0.00014		10.2844	-0.00038		10.2812	-0.00021
10.2926	-0.00015		10.2926	-0.00037		10.2894	-0.00019
10.3008	-0.00024		10.3008	-0.00037		10.2976	-0.00018
10.309	-0.00024		10.309	-0.00037		10.3058	-0.00014
10.3172	-0.00019		10.3172	-0.00038		10.314	-0.00014
10.3254	-0.00014		10.3254	-0.00021		10.3222	-0.00015
10.3336	-0.00013		10.3336	-0.00018		10.3304	-0.00018
10.3418	-0.00014		10.3418	-0.00017		10.3386	-0.00026
10.3499	-0.00015		10.3499	-0.00018		10.3468	-0.00025
10.3581	-0.00016		10.3581	-0.00018		10.355	-0.00013
10.3663	-0.0002		10.3663	-0.00024		10.3631	-0.00013
10.3745	-0.00023		10.3745	-0.00027		10.3713	-0.00012
10.3827	-0.00021		10.3827	-0.0003		10.3795	-0.00014
10.3909	-0.00021		10.3909	-0.0003		10.3877	-0.00015
10.3991	-0.0002		10.3991	-0.0003		10.3959	-0.00022
10.4073	-0.0002		10.4073	-0.00031		10.4041	-0.00023
10.4155	-0.00019		10.4155	-0.00032		10.4123	-0.00022
10.4237	-0.00017		10.4237	-0.00031		10.4205	-0.00022
10.4319	-0.00016		10.4319	-0.00028		10.4287	-0.00021
10.44	-0.00014		10.44	-0.00027		10.4369	-0.00011
10.4482	-8.3e-05		10.4482	-0.00027		10.4451	-0.0001
10.4564	-6.3e-05		10.4564	-0.00028		10.4532	-0.00011
10.4646	2.84e-05		10.4646	-0.00028		10.4614	-0.00012
10.4728	5.51e-05		10.4728	-0.0003		10.4696	-0.00014
10.481	-6.8e-06		10.481	-0.00031		10.4778	-0.00017
10.4892	-6.9e-05		10.4892	-0.00032		10.486	-0.00017
10.4974	-0.00027		10.4974	-0.00033		10.4942	-0.00017
10.5056	-0.00027		10.5056	-0.00034		10.5024	-0.00017
10.5137	-0.00013		10.5137	-0.00036		10.5106	-0.00021
10.5219	-7.4e-05		10.5219	-0.00038		10.5188	-0.00016
10.5301	-4.9e-05		10.5301	-0.00039		10.5269	-0.00013
10.5383	-4.5e-05		10.5383	-0.00041		10.5351	3.71e-05
10.5465	-6.3e-05		10.5465	-0.00032		10.5433	6.85e-05
10.5547	-8.1e-05		10.5547	-0.00016		10.5515	8.86e-05
10.5629	-0.00013		10.5629	-0.00016		10.5597	7.33e-05
10.5711	-0.00013		10.5711	-0.00016		10.5679	5.79e-05
10.5793	-0.00012		10.5793	-0.00017		10.5761	-4.4e-05
10.5875	-0.00013		10.5875	-0.00026		10.5843	-0.00015
10.5956	-0.00014		10.5956	-0.00026		10.5925	-0.00014
10.6038	-0.00014		10.6038	-0.00026		10.6006	-0.00013
10.612	-0.00014		10.612	-0.00027		10.6088	-0.00015
10.6202	-0.00014		10.6202	-0.00028		10.617	-0.00016
10.6284	-0.00016		10.6284	-0.00034		10.6252	-9.6e-05
10.6366	-0.00011		10.6366	-0.0003		10.6334	-6.5e-05
10.6448	-0.0001		10.6448	-0.0003		10.6416	-5e-05
10.653	-9.6e-05		10.653	-0.0003		10.6498	-9.5e-05
10.6612	-9.5e-05		10.6612	-0.00031		10.658	-0.00014
10.6693	-9.4e-05		10.6693	-0.00032		10.6662	-0.00012
10.6775	-9.9e-05		10.6775	-0.00034		10.6744	-0.00011
10.6857	-0.0001		10.6857	-0.00044		10.6826	-0.00011
10.6939	-0.00019		10.6939	-0.00038		10.6907	-0.00011
10.7021	-0.00018		10.7021	-0.00038		10.6989	-2.1e-05
10.7103	-0.00017		10.7103	-0.00038		10.7071	2.33e-05
10.7185	-0.00017		10.7185	-0.00038		10.7153	3.29e-05
10.7267	-0.00013		10.7267	-0.00037		10.7235	7.34e-06
10.7349	-0.00012		10.7349	-0.00034		10.7317	-1.8e-05
10.7431	-0.00015		10.7431	-0.00034		10.7399	-8.4e-05
10.7513	-0.00017		10.7513	-0.00034		10.7481	-7.6e-05
10.7594	-0.00018		10.7594	-0.00034		10.7563	-7.4e-05
10.7676	-2e-05		10.7676	-0.00034		10.7645	-9.4e-05
10.7758	5.97e-05		10.7758	-0.00036		10.7726	-0.00011
10.784	8.37e-05		10.784	-0.00033		10.7808	-6e-05
10.7922	3.37e-05		10.7922	-0.00032		10.789	-2.4e-05
10.8004	-1.6e-05		10.8004	-0.00031		10.7972	-2.6e-05
10.8086	-0.00015		10.8086	-0.00031		10.8054	-2.7e-05
10.8168	-8.2e-05		10.8168	-0.00029		10.8136	-3.1e-05
10.825	-7e-05		10.825	-0.00029		10.8218	-8.3e-05
10.8331	-6.8e-05		10.8331	-0.00029		10.83	-2.9e-05
10.8413	-6.6e-05		10.8413	-0.00029		10.8382	0.000121
10.8495	0.000122		10.8495	-0.00029		10.8463	0.000114
10.8577	0.000109		10.8577	-0.0003		10.8545	0.000107
10.8659	9.61e-05		10.8659	-0.0003		10.8627	8.85e-05
10.8741	6.91e-05		10.8741	-0.0003		10.8709	-9.1e-05
10.8823	-0.0001		10.8823	-0.0003		10.8791	-0.00021
10.8905	-8.3e-05		10.8905	-0.0003		10.8873	-0.00018
10.8987	7.59e-05		10.8987	-0.00034		10.8955	-5.7e-05
10.9069	0.00014		10.9069	-0.00034		10.9037	-2e-05
10.9151	0.000136		10.9151	-0.0003		10.9119	1.7e-05
10.9232	0.000133		10.9232	-0.0003		10.92	6.72e-05
10.9314	-0.00016		10.9314	-0.0003		10.9282	8.63e-05
10.9396	-0.0002		10.9396	-0.0003		10.9364	6.97e-05
10.9478	-0.00021		10.9478	-0.0003		10.9446	5.32e-05
10.956	-0.00021		10.956	-0.00027		10.9528	0.000162
10.9642	-0.00021		10.9642	-0.00027		10.961	0.000459
10.9724	-0.00021		10.9724	-0.00027		10.9692	0.000448
10.9806	-0.00021		10.9806	-0.00029		10.9774	0.000437
10.9887	-0.00025		10.9887	-0.00034		10.9856	0.000359
10.9969	-0.00023		10.9969	-0.00034		10.9938	0.000183
11.0051	-0.00022		11.0051	-0.00033		11.002	-0.00018
11.0133	-0.00022		11.0133	-0.00033		11.0101	-0.00018
11.0215	-0.00022		11.0215	-0.00032		11.0183	-0.00018
11.0297	-0.00022		11.0297	-0.0003		11.0265	-0.00019
11.0379	-0.00022		11.0379	-0.00022		11.0347	-0.00021
11.0461	-4.6e-05		11.0461	-0.00019		11.0429	-0.0002
11.0543	4.11e-05		11.0543	-0.00015		11.0511	-0.00018
11.0625	5.56e-05		11.0625	0.000105		11.0593	-0.00011
11.0707	3.38e-06		11.0707	7.1e-06		11.0675	-0.00011
11.0788	-4.9e-05		11.0788	-9.1e-05		11.0757	-0.00011
11.087	-7.5e-05		11.087	-0.00033		11.0838	-0.00011
11.0952	-9.5e-05		11.0952	-0.00041		11.092	-0.00011
11.1034	-0.00012		11.1034	-0.00044		11.1002	-0.00011
11.1116	-0.00016		11.1116	-0.00041		11.1084	-0.00016
11.1198	-0.00012		11.1198	-0.00039		11.1166	-0.00014
11.128	-3.3e-05		11.128	-0.00038		11.1248	-0.00013
11.1362	0.000118		11.1362	-0.00035		11.133	-0.00013
11.1444	0.000123		11.1444	-0.00035		11.1412	-0.00013
11.1525	9.36e-05		11.1525	-0.00035		11.1494	-0.00013
11.1607	6.39e-05		11.1607	-0.00036		11.1576	-0.00015
11.1689	-9.7e-05		11.1689	-0.00038		11.1657	-0.00022
11.1771	-0.0002		11.1771	-0.00033		11.1739	-0.00028
11.1853	-0.0002		11.1853	-0.00033		11.1821	-0.00029
11.1935	-0.0002		11.1935	-0.00033		11.1903	-0.00022
11.2017	-0.00025		11.2017	-0.00033		11.1985	-0.00021
11.2099	-0.00027		11.2099	-0.00035		11.2067	-0.00018
11.2181	-0.00024		11.2181	-0.00022		11.2149	-0.00018
11.2263	-0.0002		11.2263	-0.00021		11.2231	-0.00018
11.2345	-0.00019		11.2345	-0.00021		11.2313	-0.0002
11.2426	-0.00019		11.2426	-0.00021		11.2395	-0.00022
11.2508	-0.00019		11.2508	-0.00021		11.2477	-0.00021
11.259	-0.00019		11.259	-0.00029		11.2558	-0.00017
11.2672	-0.00022		11.2672	-0.00038		11.264	-0.00017
11.2754	-0.00025		11.2754	-0.00034		11.2722	-0.00017
11.2836	-0.00023		11.2836	-0.00034		11.2804	-0.00017
11.2918	-0.00022		11.2918	-0.00034		11.2886	-0.00026
11.3	-0.00022		11.3	-0.00033		11.2968	-0.00031
11.3082	-0.00022		11.3082	-0.0003		11.305	-0.00016
11.3163	-0.00022		11.3163	-0.00021		11.3132	-8.3e-05
11.3245	-0.00023		11.3245	-0.00021		11.3214	-7.5e-05
11.3327	-0.00023		11.3327	-0.00022		11.3295	-7.3e-05
11.3409	-0.00025		11.3409	-0.00025		11.3377	-7.2e-05
11.3491	-0.00019		11.3491	-0.0003		11.3459	2.56e-05
11.3573	-5.6e-05		11.3573	-0.00029		11.3541	7.31e-05
11.3655	5.02e-06		11.3655	-0.00028		11.3623	9.57e-05
11.3737	-2.7e-05		11.3737	0.00044		11.3705	0.0001
11.3819	-5.8e-05		11.3819	0.000432		11.3787	0.000102
11.3901	-0.0002		11.3901	0.000425		11.3869	7.02e-05
11.3982	-0.00019		11.3982	0.000353		11.3951	3.81e-05
11.4064	-0.00019		11.4064	-0.00015		11.4032	-0.00011
11.4146	-0.00019		11.4146	-0.00017		11.4114	-0.00017
11.4228	-0.00017		11.4228	-0.0001		11.4196	-0.00016
11.431	-0.00016		11.431	-9.3e-05		11.4278	-0.00016
11.4392	-0.00013		11.4392	-8.6e-05		11.436	-0.00015
11.4474	-5.2e-06		11.4474	7.9e-06		11.4442	-9.3e-05
11.4556	-1.2e-05		11.4556	9.74e-05		11.4524	-9.4e-05
11.4638	-1.9e-05		11.4638	4.93e-05		11.4606	-9.5e-05
11.4719	-4.6e-05		11.4719	1.12e-06		11.4688	-0.00011
11.4801	-0.0001		11.4801	-9.8e-05		11.477	-0.00013
11.4883	-0.00019		11.4883	-0.00013		11.4852	-0.00017
11.4965	-0.00017		11.4965	-0.00014		11.4933	-0.00017
11.5047	-0.00017		11.5047	-0.00014		11.5015	-0.00017
11.5129	-0.00017		11.5129	-0.00014		11.5097	-0.00017
11.5211	-0.00018		11.5211	-0.00034		11.5179	-0.00016
11.5293	-0.00019		11.5293	-0.00036		11.5261	-0.00017
11.5375	-0.0002		11.5375	-0.00035		11.5343	-0.00018
11.5457	-0.0002		11.5457	-0.00034		11.5425	-0.00022
11.5539	-0.00023		11.5539	-0.00031		11.5507	-0.00018
11.562	-0.00025		11.562	-0.00028		11.5589	-0.00012
11.5702	-0.00019		11.5702	-0.00028		11.5671	-0.00011
11.5784	-4.1e-05		11.5784	-0.00028		11.5752	-0.00011
11.5866	5.49e-05		11.5866	-0.00029		11.5834	-0.00011
11.5948	6.72e-05		11.5948	-0.00031		11.5916	-0.00011
11.603	6.02e-05		11.603	-0.00037		11.5998	-0.00016
11.6112	5.33e-05		11.6112	-0.00024		11.608	-0.00026
11.6194	-2.4e-05		11.6194	0.001092		11.6162	-0.00029
11.6276	-0.00013		11.6276	0.001101		11.6244	-0.00027
11.6357	-0.0002		11.6357	0.001105		11.6326	-0.00027
11.6439	-0.00018		11.6439	0.000932		11.6408	-0.00027
11.6521	-0.00012		11.6521	0.00076		11.6489	-0.00027
11.6603	-0.0001		11.6603	-0.00014		11.6571	-0.00025
11.6685	-0.0001		11.6685	-0.0002		11.6653	-0.00023
11.6767	-9.8e-05		11.6767	-0.0002		11.6735	-0.0002
11.6849	-0.0001		11.6849	-0.0002		11.6817	-0.0002
11.6931	-0.00011		11.6931	-0.0002		11.6899	-0.0002
11.7013	-0.00014		11.7013	-0.0002		11.6981	-0.0002
11.7095	-0.00022		11.7095	-0.00023		11.7063	-0.00021
11.7176	-0.00023		11.7176	-0.00026		11.7145	-0.00024
11.7258	-0.00024		11.7258	-0.00033		11.7226	-0.00019
11.734	-0.00021		11.734	-0.00032		11.7308	1.06e-05
11.7422	-0.0002		11.7422	-0.00031		11.739	0.000725
11.7504	-0.0002		11.7504	-0.00031		11.7472	0.000892
11.7586	-0.00019		11.7586	-0.0003		11.7554	0.000894
11.7668	-0.00016		11.7668	-0.00029		11.7636	0.000893
11.775	-0.00013		11.775	-0.00025		11.7718	0.000892
11.7832	-0.00011		11.7832	0.000475		11.78	0.000701
11.7913	-9.3e-05		11.7913	0.000856		11.7882	-7.7e-05
11.7995	-9.6e-05		11.7995	0.000639		11.7964	-0.00021
11.8077	-9.9e-05		11.8077	0.000422		11.8046	-0.00023
11.8159	-0.00016		11.8159	-5e-05		11.8127	-0.00015
11.8241	-0.00017		11.8241	-3.8e-05		11.8209	-7.5e-05
11.8323	-0.00012		11.8323	-6e-05		11.8291	-6.6e-05
11.8405	-0.00012		11.8405	-8.2e-05		11.8373	-7e-05
11.8487	-0.00013		11.8487	-0.00013		11.8455	-7.4e-05
11.8569	-0.00013		11.8569	-0.00031		11.8537	-0.00016
11.8651	-0.00015		11.8651	-0.00029		11.8619	-0.0002
11.8733	-0.00016		11.8733	-0.00026		11.8701	-0.00032
11.8814	-0.00017		11.8814	-0.00024		11.8783	-0.00029
11.8896	-0.00015		11.8896	-0.00023		11.8864	-0.00024
11.8978	-0.00015		11.8978	-0.00023		11.8946	-0.00019
11.906	-0.00015		11.906	-0.00023		11.9028	-9.1e-05
11.9142	-0.00015		11.9142	-0.00023		11.911	-4.5e-05
11.9224	-0.00016		11.9224	-0.00025		11.9192	-6.3e-05
11.9306	-0.00021		11.9306	-0.00031		11.9274	-8.1e-05
11.9388	-0.00025		11.9388	0.000155		11.9356	-0.00027
11.947	-0.00025		11.947	0.000275		11.9438	-0.0003
11.9551	-0.00025		11.9551	0.000279		11.952	-0.00018
11.9633	-0.00025		11.9633	0.000278		11.9602	-0.00016
11.9715	-0.00026		11.9715	0.000277		11.9683	-0.00015
11.9797	-0.00027		11.9797	-0.00014		11.9765	-2.9e-05
11.9879	-0.00026		11.9879	-0.00026		11.9847	3.01e-05
11.9961	-0.00026		11.9961	-0.00029		11.9929	2.8e-05
12.0043	-0.00025		12.0043	-0.00028		12.0011	2.59e-05
12.0125	-0.00022		12.0125	-0.00029		12.0093	-6.4e-06
12.0207	-0.00018		12.0207	-0.00029		12.0175	-7.4e-05
12.0289	-0.00013		12.0289	-0.00029		12.0257	-0.00016
12.0371	-0.00013		12.0371	-0.00032		12.0339	-0.00018
12.0452	-0.00014		12.0452	-0.00036		12.042	-0.00019
12.0534	-0.00014		12.0534	-0.00035		12.0502	-0.0002
12.0616	-0.00017		12.0616	-0.00035		12.0584	-0.00019
12.0698	-0.00018		12.0698	-0.00036		12.0666	-0.00019
12.078	-0.00014		12.078	-0.00036		12.0748	-0.00018
12.0862	-0.00015		12.0862	-0.00023		12.083	-0.00018
12.0944	-0.00016		12.0944	-0.00022		12.0912	-8.1e-05
12.1026	-0.00019		12.1026	-0.00023		12.0994	-6.5e-05
12.1107	-0.00019		12.1107	-0.00024		12.1076	-5.7e-05
12.1189	-0.00019		12.1189	-0.00026		12.1158	-5.7e-05
12.1271	-0.0002		12.1271	-0.00026		12.124	-0.00012
12.1353	-0.00021		12.1353	-0.00036		12.1321	-0.00019
12.1435	-0.00021		12.1435	-0.00019		12.1403	-0.0002
12.1517	-0.00021		12.1517	-0.00015		12.1485	-0.00026
12.1599	-0.00027		12.1599	-0.00017		12.1567	-0.00033
12.1681	-0.00023		12.1681	-0.0002		12.1649	-0.0003
12.1763	-0.00021		12.1763	-0.00024		12.1731	-0.00024
12.1845	-0.00019		12.1845	-0.00025		12.1813	-0.00013
12.1927	-0.00017		12.1927	-0.00025		12.1895	-5.6e-05
12.2008	-0.00016		12.2008	-0.00029		12.1977	-5.6e-05
12.209	-0.00016		12.209	-0.00037		12.2058	-5.6e-05
12.2172	-0.00011		12.2172	-0.00039		12.214	-5.8e-05
12.2254	-0.0001		12.2254	-0.00032		12.2222	-7.4e-05
12.2336	-0.0001		12.2336	-0.00032		12.2304	-9e-05
12.2418	-0.0001		12.2418	-0.00032		12.2386	-0.0002
12.25	-0.00011		12.25	-0.00033		12.2468	-0.00022
12.2582	-0.00014		12.2582	-0.00033		12.255	-0.00023
12.2664	-0.00018		12.2664	-0.00036		12.2632	-0.00028
12.2745	-0.00022		12.2745	-0.00039		12.2714	-0.00029
12.2827	-0.00024		12.2827	-0.00042		12.2796	-0.00025
12.2909	-0.00024		12.2909	-0.00038		12.2878	-0.00021
12.2991	-0.00023		12.2991	-0.00037		12.2959	-0.00018
12.3073	-0.00022		12.3073	-0.00036		12.3041	-0.00017
12.3155	-0.00023		12.3155	-0.00036		12.3123	-0.00017
12.3237	-0.00023		12.3237	-0.00035		12.3205	-0.00017
12.3319	-0.00021		12.3319	-0.00035		12.3287	-0.00017
12.3401	-0.0002		12.3401	-0.00035		12.3369	-0.0002
12.3483	-0.0002		12.3483	-0.00026		12.3451	-2.4e-05
12.3565	-0.00018		12.3565	0.00019		12.3533	-8e-06
12.3646	-0.00018		12.3646	0.000271		12.3615	-6.9e-06
12.3728	-0.00017		12.3728	0.000305		12.3697	-5.8e-06
12.381	-0.00019		12.381	5.51e-05		12.3778	0.000112
12.3892	-0.0002		12.3892	-0.00019		12.386	0.000111
12.3974	-0.00023		12.3974	-0.0002		12.3942	0.000111
12.4056	-0.00025		12.4056	-0.00015		12.4024	0.000108
12.4138	-0.00024		12.4138	-0.00012		12.4106	-6.6e-05
12.422	-9.4e-05		12.422	-0.00013		12.4188	-0.00016
12.4302	-2.6e-05		12.4302	-0.00014		12.427	-0.00018
12.4383	-4.9e-05		12.4383	-0.00017		12.4352	-0.00021
12.4465	-7.3e-05		12.4465	-0.00028		12.4434	-0.00027
12.4547	-0.00014		12.4547	-0.00034		12.4515	-0.00028
12.4629	-0.00018		12.4629	-0.00032		12.4597	-0.00028
12.4711	-0.0002		12.4711	-0.00023		12.4679	-0.00029
12.4793	-0.00026		12.4793	6.7e-05		12.4761	-0.00013
12.4875	-0.00026		12.4875	0.000163		12.4843	-5.8e-05
12.4957	-0.00024		12.4957	0.000205		12.4925	-4.3e-05
12.5039	-0.00023		12.5039	0.000207		12.5007	-2.7e-05
12.5121	-0.00023		12.5121	0.000206		12.5089	1.49e-05
12.5202	-0.00015		12.5202	0.000205		12.5171	3e-05
12.5284	-0.00015		12.5284	1.31e-06		12.5252	1.16e-05
12.5366	-0.00015		12.5366	-0.0002		12.5334	-6.8e-06
12.5448	-0.00015		12.5448	-0.0003		12.5416	7.06e-05
12.553	-0.00016		12.553	-1.3e-06		12.5498	6.9e-05
12.5612	-0.00019		12.5612	0.000319		12.558	6.74e-05
12.5694	-0.00021		12.5694	0.000432		12.5662	5.9e-05
12.5776	-0.00023		12.5776	0.000314		12.5744	5.92e-06
12.5858	-0.00028		12.5858	0.000196		12.5826	1.01e-05
12.5939	-0.00013		12.5939	-0.00038		12.5908	-1.1e-05
12.6021	-8.5e-05		12.6021	-0.00039		12.599	-3.3e-05
12.6103	-3.9e-05		12.6103	-0.00035		12.6072	-9e-05
12.6185	0.000103		12.6185	-0.00032		12.6153	-0.00021
12.6267	0.000161		12.6267	-0.00031		12.6235	-0.00019
12.6349	0.000167		12.6349	-0.00031		12.6317	-0.00019
12.6431	0.000115		12.6431	-0.00031		12.6399	-0.00019
12.6513	6.32e-05		12.6513	-0.00032		12.6481	-0.00018
12.6595	-0.00011		12.6595	-0.00042		12.6563	-0.00015
12.6677	-0.00016		12.6677	-0.00046		12.6645	-0.00014
12.6759	-0.00014		12.6759	-0.00044		12.6727	-0.00013
12.684	-0.00014		12.684	-0.00043		12.6809	-0.00018
12.6922	-0.00013		12.6922	-0.00043		12.689	-0.00024
12.7004	-0.00013		12.7004	-0.00022		12.6972	-0.00018
12.7086	-0.00013		12.7086	-0.00021		12.7054	-0.00017
12.7168	-0.00014		12.7168	-0.0002		12.7136	-0.00016
12.725	-0.00015		12.725	-0.00022		12.7218	-0.00015
12.7332	-0.0001		12.7332	-0.00023		12.73	-9e-05
12.7414	-0.0001		12.7414	-0.00023		12.7382	-3.2e-05
12.7496	-0.0001		12.7496	-0.00023		12.7464	3.35e-05
12.7577	-0.0001		12.7577	-0.00027		12.7546	9.21e-05
12.7659	-7.2e-05		12.7659	-0.00036		12.7628	0.000113
12.7741	-6.4e-05		12.7741	-0.00033		12.7709	0.000108
12.7823	-8.6e-05		12.7823	-0.0003		12.7791	0.000102
12.7905	-0.00011		12.7905	-0.00025		12.7873	8.49e-05
12.7987	-0.00012		12.7987	-6.8e-05		12.7955	-8.9e-05
12.8069	-0.00013		12.8069	0.000131		12.8037	-0.00011
12.8151	-0.00016		12.8151	0.001352		12.8119	-0.00013
12.8233	-0.00019		12.8233	0.001186		12.8201	-0.0002
12.8315	-0.00022		12.8315	0.00102		12.8283	-0.00023
12.8397	-0.00025		12.8397	0.00062		12.8365	-0.00019
12.8478	-0.00015		12.8478	-0.00019		12.8446	-0.00017
12.856	8.35e-05		12.856	-0.00027		12.8528	-0.00017
12.8642	9.29e-05		12.8642	-0.00038		12.861	-0.00021
12.8724	6.57e-05		12.8724	-0.00037		12.8692	-0.00025
12.8806	3.84e-05		12.8806	-0.00036		12.8774	-0.00021
12.8888	-9.4e-05		12.8888	-0.00034		12.8856	-0.00019
12.897	-0.00027		12.897	-0.00032		12.8938	-0.00017
12.9052	-0.00029		12.9052	-0.00032		12.902	-0.00016
12.9133	-0.00025		12.9133	-0.00032		12.9102	-0.00017
12.9215	-0.00017		12.9215	-0.00032		12.9184	-0.00017
12.9297	-0.00015		12.9297	-0.00035		12.9266	-0.00018
12.9379	-0.00011		12.9379	-0.00036		12.9347	-0.0001
12.9461	-9.4e-05		12.9461	-0.00037		12.9429	-0.0001
12.9543	-0.0001		12.9543	-0.00037		12.9511	-0.0001
12.9625	-0.00011		12.9625	-0.00037		12.9593	-0.0001
12.9707	-0.00016		12.9707	-0.00038		12.9675	-8e-05
12.9789	-0.00015		12.9789	-0.0004		12.9757	-8e-05
12.9871	-0.00014		12.9871	-0.0004		12.9839	-8e-05
12.9953	-0.00014		12.9953	-0.00039		12.9921	-8.1e-05
13.0034	-0.00013		13.0034	-0.00039		13.0003	-0.00011
13.0116	-0.00015		13.0116	-0.00038		13.0084	-0.00015
13.0198	-0.00017		13.0198	-0.00037		13.0166	-0.00014
13.028	-0.00018		13.028	-0.00037		13.0248	-5.1e-05
13.0362	-0.00018		13.0362	-0.00037		13.033	0.000185
13.0444	-0.00019		13.0444	-0.00037		13.0412	0.000186
13.0526	-0.0002		13.0526	-0.00038		13.0494	0.000186
13.0608	-0.00023		13.0608	-0.00038		13.0576	0.000186
13.069	-0.00023		13.069	-0.00039		13.0658	-1.8e-05
13.0771	-0.00023		13.0771	-0.0004		13.074	-4.2e-05
13.0853	-0.00024		13.0853	-0.00036		13.0822	-6.6e-05
13.0935	-0.00025		13.0935	0.000205		13.0904	-0.00017
13.1017	-0.00022		13.1017	0.000188		13.0985	-0.00014
13.1099	-8.9e-05		13.1099	0.000171		13.1067	-0.00012
13.1181	-0.0001		13.1181	0.000101		13.1149	3.69e-05
13.1263	-0.00011		13.1263	-0.00026		13.1231	4.4e-05
13.1345	-0.00015		13.1345	-0.00015		13.1313	4.74e-05
13.1427	-0.00021		13.1427	0.000463		13.1395	4.68e-05
13.1509	-0.00024		13.1509	0.000424		13.1477	4.63e-05
13.1591	-0.00022		13.1591	0.000385		13.1559	-9.8e-05
13.1672	-0.00021		13.1672	0.000271		13.164	-0.00011
13.1754	-0.00021		13.1754	-0.0004		13.1722	-0.00011
13.1836	-0.00021		13.1836	-0.00043		13.1804	-0.00014
13.1918	-0.00019		13.1918	-0.00045		13.1886	-0.00019
13.2	-0.00018		13.2	-0.00023		13.1968	-0.00026
13.2082	-0.00019		13.2082	-0.00022		13.205	-0.00025
13.2164	-0.00019		13.2164	-0.00022		13.2132	-0.00025
13.2246	-0.00019		13.2246	-0.00022		13.2214	-0.00025
13.2327	-0.00016		13.2327	-0.00021		13.2296	-0.00025
13.2409	-0.00016		13.2409	-0.00023		13.2378	-0.00025
13.2491	-0.00016		13.2491	-0.00024		13.246	-0.00026
13.2573	-0.00016		13.2573	-0.00028		13.2541	-0.00028
13.2655	-0.00024		13.2655	-0.00029		13.2623	-0.0003
13.2737	-0.00027		13.2737	-0.00033		13.2705	-0.00022
13.2819	-0.00025		13.2819	-0.00037		13.2787	-0.00014
13.2901	-0.00019		13.2901	-0.00036		13.2869	-0.00013
13.2983	-0.00014		13.2983	-0.00022		13.2951	-0.00014
13.3065	-9.6e-05		13.3065	-0.00024		13.3033	-0.00014
13.3147	-6.6e-05		13.3147	-0.00025		13.3115	-0.00015
13.3228	-6.3e-05		13.3228	-0.00031		13.3197	-0.0002
13.331	1.86e-06		13.331	-0.00043		13.3278	-0.00024
13.3392	2.96e-05		13.3392	-0.00042		13.336	-0.00016
13.3474	1.02e-05		13.3474	-0.00042		13.3442	-0.00014
13.3556	-9.1e-06		13.3556	-0.00042		13.3524	4.92e-05
13.3638	-0.00022		13.3638	-0.00042		13.3606	4.83e-05
13.372	-0.00023		13.372	-0.00043		13.3688	4.74e-05
13.3802	-0.00025		13.3802	-0.00036		13.377	2.87e-05
13.3884	-0.00018		13.3884	-0.00033		13.3852	-1.7e-05
13.3965	-0.00017		13.3965	-0.0003		13.3934	-0.00013
13.4047	-0.00017		13.4047	-0.0003		13.4016	-0.00021
13.4129	-0.00018		13.4129	-0.00029		13.4098	-0.00025
13.4211	-0.00019		13.4211	-0.00028		13.4179	-0.00022
13.4293	-0.00026		13.4293	0.000206		13.4261	6.43e-05
13.4375	-0.00032		13.4375	0.000746		13.4343	6.69e-05
13.4457	-0.00023		13.4457	0.000539		13.4425	6.79e-05
13.4539	-0.00013		13.4539	0.000332		13.4507	2.62e-05
13.4621	-8.3e-05		13.4621	-0.00017		13.4589	-1.6e-05
13.4703	-7e-05		13.4703	-0.00027		13.4671	-6.4e-05
13.4785	-0.00013		13.4785	-0.00038		13.4753	-0.00022
13.4866	-0.00019		13.4866	-0.00047		13.4835	-0.00026
13.4948	-0.00021		13.4948	-0.00043		13.4916	-0.00025
13.503	-0.0002		13.503	-0.00041		13.4998	-0.00022
13.5112	-0.00019		13.5112	-0.0004		13.508	-0.00021
13.5194	-0.00019		13.5194	-0.00034		13.5162	-0.00021
13.5276	-0.00019		13.5276	-4.1e-05		13.5244	-0.00021
13.5358	-0.00019		13.5358	-4.3e-05		13.5326	-0.00022
13.544	-0.00024		13.544	-4.5e-05		13.5408	-0.00023
13.5522	-0.00028		13.5522	-4.9e-05		13.549	-0.00018
13.5603	-0.00027		13.5603	-0.00042		13.5572	-3.1e-05
13.5685	-0.00026		13.5685	-0.00042		13.5654	0.000114
13.5767	-0.00025		13.5767	-0.00039		13.5735	9.33e-05
13.5849	-0.00025		13.5849	-0.00039		13.5817	7.23e-05
13.5931	-0.00023		13.5931	-0.00039		13.5899	2.77e-05
13.6013	-0.00021		13.6013	-0.00039		13.5981	-0.0002
13.6095	-0.00019		13.6095	-0.00039		13.6063	-0.00022
13.6177	-0.00014		13.6177	-0.00047		13.6145	-2.3e-05
13.6259	-0.00014		13.6259	-0.00053		13.6227	6.69e-05
13.6341	-0.00014		13.6341	-0.00043		13.6309	0.000156
13.6422	-0.00014		13.6422	-0.0004		13.6391	0.000157
13.6504	-0.00019		13.6504	-0.00039		13.6472	0.00015
13.6586	-0.00018		13.6586	-0.00039		13.6554	0.000144
13.6668	7.85e-05		13.6668	-0.00038		13.6636	-0.00023
13.675	0.00019		13.675	-0.00039		13.6718	-0.00025
13.6832	0.000177		13.6832	-0.00039		13.68	-0.00025
13.6914	0.000164		13.6914	-0.00039		13.6882	-0.00026
13.6996	-0.00012		13.6996	-0.00039		13.6964	-0.00027
13.7078	-0.00015		13.7078	-0.00037		13.7046	-0.00019
13.7159	-0.00016		13.7159	-0.00037		13.7128	-2.5e-05
13.7241	-0.0002		13.7241	-0.00037		13.721	1.26e-05
13.7323	-0.0002		13.7323	-0.00038		13.7292	3.07e-05
13.7405	-0.0002		13.7405	-0.00039		13.7373	2.29e-05
13.7487	-0.0002		13.7487	-0.00039		13.7455	1.51e-05
13.7569	-0.00021		13.7569	-0.00039		13.7537	7.46e-05
13.7651	-0.00026		13.7651	-0.00039		13.7619	0.000103
13.7733	-0.00027		13.7733	-0.00036		13.7701	0.000115
13.7815	-0.00026		13.7815	-0.00035		13.7783	1.36e-05
13.7897	-0.00025		13.7897	-0.00034		13.7865	-8.8e-05
13.7979	-0.00025		13.7979	-0.00035		13.7947	-0.00011
13.806	-0.00025		13.806	-0.00035		13.8029	-0.00013
13.8142	-0.00025		13.8142	-0.00033		13.811	-0.00017
13.8224	-0.00021		13.8224	-0.00032		13.8192	-0.00021
13.8306	-0.0002		13.8306	-0.00034		13.8274	-0.00024
13.8388	-0.00019		13.8388	-0.00036		13.8356	-0.00021
13.847	-0.00019		13.847	-0.00041		13.8438	-0.0002
13.8552	-0.00019		13.8552	-0.0004		13.852	-0.00019
13.8634	-0.0002		13.8634	-0.0004		13.8602	-0.00019
13.8716	-0.0002		13.8716	-0.0004		13.8684	-0.0002
13.8797	-0.00024		13.8797	-0.0004		13.8766	-0.00021
13.8879	-0.00028		13.8879	-0.0004		13.8848	-0.00024
13.8961	-0.00026		13.8961	-0.00044		13.893	-0.00031
13.9043	-0.00024		13.9043	-0.00044		13.9011	-0.00029
13.9125	-0.00021		13.9125	-0.00043		13.9093	-0.00029
13.9207	-0.00017		13.9207	-0.00043		13.9175	-0.00028
13.9289	-0.00017		13.9289	-0.00043		13.9257	-0.00028
13.9371	-0.00017		13.9371	-0.00043		13.9339	-0.00018
13.9453	-0.00017		13.9453	-0.00042		13.9421	-0.00014
13.9535	-0.00019		13.9535	-0.00042		13.9503	-0.00014
13.9617	-0.00025		13.9617	-0.00042		13.9585	-0.00013
13.9698	-0.00022		13.9698	-0.00042		13.9666	-0.00013
13.978	-0.00021		13.978	-0.00038		13.9748	-0.00016
13.9862	-0.00021		13.9862	-0.00033		13.983	-0.00019
13.9944	-0.00021		13.9944	-0.00031		13.9912	-2.6e-05
14.0026	-0.00016		14.0026	-0.0003		13.9994	4.13e-05
14.0108	-0.00011		14.0108	-0.0003		14.0076	4.67e-05
14.019	-0.00011		14.019	-0.0003		14.0158	3.79e-05
14.0272	-0.00011		14.0272	-0.00026		14.024	2.91e-05
14.0353	-0.00011		14.0353	-8.9e-05		14.0322	-1.7e-05
14.0435	-0.00012		14.0435	-3.2e-05		14.0404	-0.00014
14.0517	-0.00012		14.0517	-7.1e-05		14.0486	-9.9e-05
14.0599	-0.00012		14.0599	-0.00011		14.0567	-6.4e-05
14.0681	-0.00016		14.0681	-0.00022		14.0649	-6.6e-05
14.0763	-0.00017		14.0763	-0.00022		14.0731	-6.7e-05
14.0845	-0.00017		14.0845	-0.00023		14.0813	-7.1e-05
14.0927	-0.00018		14.0927	-0.0003		14.0895	-0.00016
14.1009	-0.00021		14.1009	-0.00035		14.0977	-0.00015
14.1091	-0.00018		14.1091	-0.00036		14.1059	-0.00015
14.1173	-0.00015		14.1173	-0.00037		14.1141	-0.00015
14.1254	-0.00015		14.1254	-0.00037		14.1223	-0.00015
14.1336	-0.00015		14.1336	-0.00038		14.1304	-0.00024
14.1418	-0.00017		14.1418	-0.00039		14.1386	-0.0002
14.15	-0.00027		14.15	-0.00039		14.1468	-0.00021
14.1582	-0.00022		14.1582	-0.00044		14.155	-0.00021
14.1664	-0.0002		14.1664	-0.00041		14.1632	-0.00023
14.1746	-0.00019		14.1746	-0.0004		14.1714	-0.00025
14.1828	-0.00019		14.1828	-0.0004		14.1796	-0.00025
14.191	-0.00015		14.191	-0.0004		14.1878	-0.00026
14.1991	-7e-05		14.1991	-0.00035		14.196	-0.00027
14.2073	-5.8e-05		14.2073	-0.00035		14.2042	-0.0003
14.2155	-5.9e-05		14.2155	-0.00035		14.2124	-0.00017
14.2237	-6e-05		14.2237	-0.00035		14.2205	-6.5e-05
14.2319	-0.00017		14.2319	-0.00036		14.2287	-1.7e-05
14.2401	-0.00025		14.2401	-0.00041		14.2369	-9.9e-06
14.2483	-0.00024		14.2483	-0.00039		14.2451	-4.3e-05
14.2565	-0.00023		14.2565	-0.00039		14.2533	-7.7e-05
14.2647	-0.00023		14.2647	-0.00038		14.2615	-0.00023
14.2729	-0.00023		14.2729	-0.00025		14.2697	-0.00023
14.2811	-0.00024		14.2811	-0.00025		14.2779	-0.00023
14.2892	-0.00028		14.2892	-0.00026		14.2861	-0.00024
14.2974	-0.00027		14.2974	-0.00032		14.2942	-0.00024
14.3056	-0.00023		14.3056	-0.00045		14.3024	-0.00026
14.3138	-0.00019		14.3138	-0.00033		14.3106	-0.00027
14.322	-0.00019		14.322	0.000247		14.3188	-9.5e-05
14.3302	-0.00018		14.3302	0.000345		14.327	-9.6e-05
14.3384	-0.00018		14.3384	0.000354		14.3352	-9.8e-05
14.3466	-0.00019		14.3466	5.19e-05		14.3434	-0.00011
14.3548	-0.00021		14.3548	-0.00025		14.3516	-0.00018
14.3629	-0.00025		14.3629	-0.00034		14.3598	-0.00018
14.3711	-0.00021		14.3711	-0.00034		14.368	-0.00018
14.3793	-0.00019		14.3793	-0.00025		14.3761	-0.00021
14.3875	-0.00019		14.3875	-0.00019		14.3843	-0.00021
14.3957	-0.00019		14.3957	-0.00013		14.3925	-0.00021
14.4039	-0.00019		14.4039	8.27e-05		14.4007	-0.00021
14.4121	-0.00015		14.4121	7.55e-05		14.4089	-0.00027
14.4203	-0.00015		14.4203	6.82e-05		14.4171	-0.00021
14.4285	-0.00015		14.4285	4.52e-05		14.4253	-0.00019
14.4367	-0.00014		14.4367	-0.00032		14.4335	-0.00019
14.4448	-9.4e-06		14.4448	-0.00042		14.4417	-0.0002
14.453	5.47e-05		14.453	-0.00041		14.4498	-0.00022
14.4612	7.85e-05		14.4612	-0.00029		14.458	-0.00013
14.4694	6.88e-05		14.4694	-0.00024		14.4662	-1.3e-05
14.4776	5.92e-05		14.4776	-0.00028		14.4744	3.57e-05
14.4858	-7e-05		14.4858	-0.00031		14.4826	0.000238
14.494	-0.00022		14.494	-0.00037		14.4908	0.000304
14.5022	-0.00021		14.5022	-0.00038		14.499	0.000258
14.5104	-0.00021		14.5104	-0.00038		14.5072	0.000212
14.5185	-0.00021		14.5185	-0.00044		14.5154	0.000116
14.5267	-0.00021		14.5267	-0.00041		14.5236	-0.00027
14.5349	-0.00021		14.5349	-0.00034		14.5318	-0.00016
14.5431	-0.00025		14.5431	-0.00034		14.5399	-0.00012
14.5513	-0.00012		14.5513	-0.00034		14.5481	-0.00011
14.5595	1.48e-05		14.5595	-0.00035		14.5563	-0.00011
14.5677	6.05e-05		14.5677	-0.00035		14.5645	-0.00011
14.5759	-1.5e-05		14.5759	-0.00037		14.5727	-0.00012
14.5841	-9e-05		14.5841	-0.00034		14.5809	-0.00013
14.5923	-0.00014		14.5923	-0.00033		14.5891	-0.00015
14.6005	-0.00011		14.6005	-0.00033		14.5973	-0.00011
14.6086	-9.4e-05		14.6086	-0.00033		14.6055	-8.5e-05
14.6168	-8.8e-05		14.6168	-0.00033		14.6136	-8.8e-05
14.625	-8.2e-05		14.625	-0.00033		14.6218	-9.2e-05
14.6332	-5.2e-05		14.6332	-0.00034		14.63	5.22e-05
14.6414	-3.9e-05		14.6414	-0.00031		14.6382	0.000123
14.6496	-4.6e-05		14.6496	-0.00031		14.6464	0.000125
14.6578	-5.4e-05		14.6578	-0.00031		14.6546	0.000126
14.666	-0.00011		14.666	-0.00032		14.6628	0.000124
14.6742	-0.00012		14.6742	-0.00034		14.671	0.000121
14.6823	-0.00014		14.6823	-0.00035		14.6792	9.97e-05
14.6905	-0.00017		14.6905	-0.00036		14.6874	-7e-06
14.6987	-0.00011		14.6987	-0.00037		14.6955	-0.00011
14.7069	-3.2e-05		14.7069	-0.00041		14.7037	-0.00018
14.7151	-4.5e-06		14.7151	-0.00047		14.7119	-0.00024
14.7233	-2.5e-05		14.7233	-0.00046		14.7201	-0.0003
14.7315	-4.6e-05		14.7315	-0.00039		14.7283	-0.00024
14.7397	-0.0002		14.7397	-0.00039		14.7365	-0.00023
14.7479	-0.00018		14.7479	-0.00039		14.7447	-0.00023
14.7561	-0.00014		14.7561	-0.00028		14.7529	-0.00024
14.7642	-0.00014		14.7642	-0.00027		14.7611	-0.00024
14.7724	-0.00014		14.7724	-0.00029		14.7692	-0.00023
14.7806	-0.00014		14.7806	-0.0003		14.7774	-4e-05
14.7888	-0.00014		14.7888	-0.00033		14.7856	0.000608
14.797	-0.00015		14.797	-0.00039		14.7938	0.001044
14.8052	-0.00016		14.8052	-0.00029		14.802	0.001259
14.8134	-0.00019		14.8134	-0.00028		14.8102	0.001365
14.8216	-0.00022		14.8216	-0.00027		14.8184	0.001395
14.8298	-0.00022		14.8298	-0.00026		14.8266	0.000849
14.8379	-0.00021		14.8379	-0.00027		14.8348	0.000302
14.8461	-0.00021		14.8461	-0.00027		14.843	-3.7e-05
14.8543	-0.00021		14.8543	-0.00028		14.8512	-0.0002
14.8625	-0.00019		14.8625	-0.00043		14.8593	-0.00034
14.8707	-0.00012		14.8707	-0.00047		14.8675	-0.00034
14.8789	-9.6e-05		14.8789	-0.00035		14.8757	-0.00023
14.8871	-9.4e-05		14.8871	-0.00035		14.8839	-0.00023
14.8953	-9.2e-05		14.8953	-0.00035		14.8921	-0.00023
14.9035	-7.9e-05		14.9035	-0.00035		14.9003	-0.00023
14.9117	-7.6e-05		14.9117	-0.00034		14.9085	-0.00024
14.9199	-7.5e-05		14.9199	-0.00034		14.9167	-0.00028
14.928	-9.3e-05		14.928	-0.00034		14.9249	-0.00031
14.9362	-0.00011		14.9362	-0.00034		14.933	-0.00025
14.9444	-0.00015		14.9444	-0.00035		14.9412	-0.00024
14.9526	-0.00024		14.9526	-0.00037		14.9494	-0.00025
14.9608	-0.00024		14.9608	-0.00039		14.9576	-0.00025
14.969	-0.00024		14.969	-0.0004		14.9658	-0.0003
14.9772	-0.00026		14.9772	-0.00039		14.974	-0.00019
14.9854	-0.00018		14.9854	-0.00037		14.9822	-0.00012
14.9936	-0.00015		14.9936	-0.00038		14.9904	-5.6e-05
15.0017	-0.00013		15.0017	-0.00038		14.9986	-3e-05
15.0099	-0.00011		15.0099	-0.00039		15.0068	-1.8e-05
15.0181	0.000265		15.0181	-0.00043		15.015	-1.3e-05
15.0263	0.002437		15.0263	-0.00036		15.0231	-2.5e-05
15.0345	0.002972		15.0345	-0.00028		15.0313	-3.8e-05
15.0427	0.002627		15.0427	-0.00025		15.0395	-6.8e-05
15.0509	0.002282		15.0509	-0.00022		15.0477	-0.00023
15.0591	0.001539		15.0591	-0.00022		15.0559	-0.00029
15.0673	-0.00014		15.0673	-0.00022		15.0641	-0.00029
15.0755	-0.00018		15.0755	-0.00023		15.0723	-0.00018
15.0837	-0.00018		15.0837	-0.00024		15.0805	-8.4e-05
15.0918	-0.00019		15.0918	-0.00026		15.0886	-6.6e-05
15.1	-0.00022		15.1	-0.00037		15.0968	-8.3e-05
15.1082	-0.00024		15.1082	-0.0004		15.105	-9.9e-05
15.1164	-0.00016		15.1164	-0.00036		15.1132	-0.00014
15.1246	-5.7e-05		15.1246	-0.00028		15.1214	-0.00017
15.1328	-4.2e-05		15.1328	-0.00024		15.1296	-0.00021
15.141	-4.4e-05		15.141	-0.00022		15.1378	-0.00021
15.1492	-4.6e-05		15.1492	-0.0002		15.146	-0.00019
15.1573	-8.7e-05		15.1573	-0.00011		15.1542	-0.00017
15.1655	-0.00013		15.1655	-7.9e-05		15.1624	-0.00017
15.1737	-8e-05		15.1737	-0.00012		15.1706	-0.00017
15.1819	-5.7e-05		15.1819	-0.00015		15.1787	-0.00012
15.1901	-4.7e-05		15.1901	-0.00034		15.1869	-0.0001
15.1983	-4.5e-05		15.1983	-0.00036		15.1951	-9.9e-05
15.2065	-0.00012		15.2065	-0.00038		15.2033	-9.8e-05
15.2147	-0.0002		15.2147	-0.00044		15.2115	-8.9e-05
15.2229	-0.00017		15.2229	-0.00034		15.2197	-0.00011
15.2311	-0.00017		15.2311	-0.00031		15.2279	-0.00013
15.2393	-0.00017		15.2393	-0.0002		15.2361	-0.00017
15.2474	-0.00018		15.2474	-0.0002		15.2443	-0.00014
15.2556	-0.00019		15.2556	-0.00021		15.2524	-4e-05
15.2638	-0.0002		15.2638	-0.00023		15.2606	-5.6e-05
15.272	-0.00021		15.272	-0.0004		15.2688	-7.1e-05
15.2802	-0.00024		15.2802	-0.0004		15.277	-0.00011
15.2884	-0.00026		15.2884	-0.00035		15.2852	-0.00018
15.2966	-0.00026		15.2966	-0.00031		15.2934	-0.00028
15.3048	-0.00026		15.3048	-0.00031		15.3016	-0.00032
15.313	-0.00026		15.313	-0.0003		15.3098	-0.00015
15.3211	-0.00022		15.3211	-0.00023		15.318	-0.00012
15.3293	-0.00021		15.3293	-0.00021		15.3262	-0.00011
15.3375	-0.00022		15.3375	-0.00021		15.3344	-0.00012
15.3457	-0.00024		15.3457	-0.00021		15.3425	-0.00013
15.3539	-0.00026		15.3539	-0.00021		15.3507	-0.00015
15.3621	-0.00026		15.3621	-0.00021		15.3589	-0.00023
15.3703	-0.00027		15.3703	-0.00026		15.3671	-0.00023
15.3785	-0.00027		15.3785	-0.00037		15.3753	-0.00026
15.3867	-0.00029		15.3867	-0.00036		15.3835	-0.00015
15.3949	-0.00024		15.3949	-0.00037		15.3917	-0.00012
15.4031	-0.00022		15.4031	-0.00037		15.3999	-0.0001
15.4112	-0.0002		15.4112	-0.00037		15.4081	-9e-05
15.4194	-0.00011		15.4194	-0.00037		15.4162	-8e-05
15.4276	-7.1e-05		15.4276	-0.00038		15.4244	-7.9e-05
15.4358	-8.1e-05		15.4358	-0.00043		15.4326	-9.3e-05
15.444	-9.1e-05		15.444	-0.00042		15.4408	-0.00011
15.4522	-0.00022		15.4522	-0.00042		15.449	-0.00029
15.4604	-0.00024		15.4604	-0.00042		15.4572	-0.00026
15.4686	-0.00024		15.4686	-0.00042		15.4654	-0.00023
15.4768	-0.00024		15.4768	-0.00042		15.4736	-0.00022
15.4849	-0.00024		15.4849	-0.00044		15.4818	-0.00021
15.4931	-0.00026		15.4931	-0.00045		15.49	-0.00021
15.5013	-0.00022		15.5013	-0.00048		15.4981	-0.00011
15.5095	-0.0002		15.5095	-0.00051		15.5063	-2.2e-05
15.5177	-0.0002		15.5177	-0.0005		15.5145	8.5e-06
15.5259	-0.0002		15.5259	-0.0005		15.5227	1.43e-05
15.5341	-0.00012		15.5341	-0.0005		15.5309	5.65e-06
15.5423	-0.00012		15.5423	-0.0005		15.5391	-3e-06
15.5505	-0.00013		15.5505	-0.00052		15.5473	-2.1e-05
15.5587	-0.00015		15.5587	-0.00048		15.5555	-0.00023
15.5668	-0.0002		15.5668	-0.00048		15.5637	-0.00023
15.575	-0.0002		15.575	-0.00047		15.5718	-0.00024
15.5832	-0.0002		15.5832	-0.00044		15.58	-0.00025
15.5914	-0.0002		15.5914	-0.00035		15.5882	-0.00033
15.5996	-0.0002		15.5996	-0.00032		15.5964	-0.00023
15.6078	-0.00022		15.6078	-0.00028		15.6046	-0.00015
15.616	-0.00025		15.616	-0.00027		15.6128	-0.00012
15.6242	-0.00025		15.6242	-0.00027		15.621	-0.00014
15.6324	-0.00025		15.6324	-0.00027		15.6292	-0.00015
15.6405	-0.00028		15.6405	-0.00028		15.6374	-0.00027
15.6487	-0.00026		15.6487	-0.00029		15.6456	-0.0002
15.6569	-0.00025		15.6569	0.000173		15.6538	-5.1e-05
15.6651	-0.00024		15.6651	0.000233		15.6619	-4.6e-05
15.6733	-0.00027		15.6733	0.000117		15.6701	-4.9e-05
15.6815	-0.00029		15.6815	-3.1e-07		15.6783	-5.2e-05
15.6897	-0.00028		15.6897	-0.00024		15.6865	-7.6e-05
15.6979	-0.00028		15.6979	-0.00034		15.6947	-0.00012
15.7061	-0.00027		15.7061	-0.00035		15.7029	-0.0002
15.7143	-0.00027		15.7143	-0.00035		15.7111	-0.00021
15.7225	-0.00027		15.7225	-0.00036		15.7193	-0.00021
15.7306	-0.00027		15.7306	-0.00043		15.7275	-0.00021
15.7388	-0.00026		15.7388	-0.00046		15.7356	-0.00022
15.747	-0.00026		15.747	-0.00049		15.7438	-0.00023
15.7552	-0.00026		15.7552	-0.00048		15.752	-0.00017
15.7634	-0.00018		15.7634	-0.00048		15.7602	-0.00017
15.7716	-0.0001		15.7716	-0.00048		15.7684	-0.00017
15.7798	-4.5e-06		15.7798	-0.00048		15.7766	-0.00018
15.788	3.45e-05		15.788	-0.00047		15.7848	-0.00019
15.7962	3.44e-05		15.7962	-0.00037		15.793	-0.00023
15.8043	3.29e-05		15.8043	-0.00034		15.8012	-0.00028
15.8125	3.14e-05		15.8125	-0.00031		15.8094	-0.00021
15.8207	0.000123		15.8207	0.000224		15.8175	-0.0002
15.8289	0.000122		15.8289	0.001027		15.8257	-0.0002
15.8371	0.000122		15.8371	0.001372		15.8339	-0.00021
15.8453	9.02e-05		15.8453	0.001003		15.8421	-0.00022
15.8535	-3e-05		15.8535	0.000634		15.8503	-0.00025
15.8617	-5.4e-05		15.8617	-0.00013		15.8585	-0.00032
15.8699	-0.00012		15.8699	-0.00032		15.8667	-0.00026
15.878	-0.00017		15.878	-0.00039		15.8749	-0.00024
15.8862	-0.00025		15.8862	-0.00039		15.8831	-0.00023
15.8944	-0.00031		15.8944	-0.00039		15.8912	-0.00022
15.9026	-0.00031		15.9026	-0.0004		15.8994	-0.00011
15.9108	-0.00031		15.9108	-0.00043		15.9076	-9.5e-05
15.919	-0.0003		15.919	-0.00043		15.9158	-9.3e-05
15.9272	-0.0003		15.9272	-0.00044		15.924	-0.0001
15.9354	-0.00025		15.9354	-0.00045		15.9322	-0.00012
15.9436	-0.00014		15.9436	-0.00048		15.9404	-0.00014
15.9518	-0.00013		15.9518	-0.00047		15.9486	-0.00016
15.9599	-0.00013		15.9599	-0.00045		15.9568	-0.0002
15.9681	-0.00013		15.9681	-0.00044		15.965	-0.00023
15.9763	-0.00019		15.9763	-0.00042		15.9732	-7.9e-05
15.9845	-0.00028		15.9845	-0.00041		15.9813	5.37e-05
15.9927	-0.00024		15.9927	-0.00042		15.9895	0.000105
16.0009	-0.00023		16.0009	-0.00042		15.9977	7.62e-05
16.0091	-0.00023		16.0091	-0.00033		16.0059	4.76e-05
16.0173	-0.00023		16.0173	-0.00029		16.0141	-0.00019
16.0255	-0.00019		16.0255	-0.00029		16.0223	-0.00022
16.0337	-0.00018		16.0337	-0.0003		16.0305	-0.00025
16.0419	-0.00017		16.0419	-0.00032		16.0387	-0.00031
16.05	-0.00016		16.05	-0.00035		16.0469	-0.00032
16.0582	-0.00016		16.0582	-0.00045		16.0551	-0.00032
16.0664	-0.00016		16.0664	-0.00046		16.0632	-0.00025
16.0746	-0.00016		16.0746	-0.00047		16.0714	-0.00025
16.0828	-0.00021		16.0828	-0.00043		16.0796	-0.00024
16.091	-0.0002		16.091	0.000204		16.0878	-0.00016
16.0992	-0.0002		16.0992	0.000445		16.096	5.49e-05
16.1074	-0.00021		16.1074	0.000433		16.1042	5.36e-05
16.1156	-0.00021		16.1156	0.000421		16.1124	5.23e-05
16.1238	-0.00027		16.1238	0.000385		16.1206	3.89e-05
16.1319	-0.00024		16.1319	-5.6e-05		16.1288	-4.5e-05
[truncated: 10,241 more rows]

## Sheet: 7 f
Radius (nm)	Replicate 1		Radius (nm)	Replicate 2		Radius (nm)	Replicate 3
47.6395	67999382		40.4917	82723514		48.6947	50560858
47.6488	68358273		40.5209	83057955		48.6896	50906721
47.6581	68718339		40.55	83393096		48.6846	51254186
47.6673	69079580		40.5792	83728937		48.6796	51603257
47.6767	69441995		40.6083	84065475		48.6747	51953934
47.686	69805586		40.6374	84402710		48.6699	52306220
47.6954	70170351		40.6665	84740640		48.6652	52660116
47.7048	70536291		40.6955	85079265		48.6605	53015624
47.7143	70903405		40.7246	85418582		48.6559	53372747
47.7238	71271692		40.7536	85758592		48.6513	53731485
47.7332	71641153		40.7826	86099291		48.6468	54091840
47.7428	72011787		40.8115	86440680		48.6424	54453815
47.7523	72383594		40.8405	86782757		48.6381	54817410
47.7619	72756573		40.8694	87125520		48.6338	55182628
47.7715	73130725		40.8984	87468969		48.6296	55549469
47.7812	73506048		40.9273	87813102		48.6254	55917936
47.7908	73882543		40.9561	88157917		48.6214	56288029
47.8005	74260208		40.985	88503413		48.6173	56659751
47.8102	74639044		41.0138	88849590		48.6134	57033102
47.82	75019049		41.0426	89196445		48.6095	57408085
47.8298	75400224		41.0714	89543977		48.6057	57784700
47.8396	75782568		41.1002	89892186		48.6019	58162949
47.8494	76166080		41.129	90241069		48.5982	58542832
47.8592	76550760		41.1577	90590625		48.5946	58924352
47.8691	76936607		41.1864	90940853		48.5911	59307510
47.879	77323621		41.2151	91291751		48.5876	59692306
47.889	77711800		41.2438	91643318		48.5841	60078742
47.8989	78101145		41.2724	91995553		48.5807	60466819
47.9089	78491655		41.301	92348455		48.5774	60856538
47.9189	78883328		41.3297	92702021		48.5742	61247899
47.929	79276165		41.3582	93056250		48.571	61640905
47.939	79670164		41.3868	93411141		48.5679	62035556
47.9491	80065325		41.4154	93766693		48.5648	62431852
47.9592	80461646		41.4439	94122903		48.5618	62829796
47.9694	80859128		41.4724	94479771		48.5589	63229387
47.9795	81257769		41.5009	94837296		48.556	63630626
47.9897	81657569		41.5294	95195474		48.5532	64033514
47.9999	82058527		41.5578	95554306		48.5505	64438053
48.0102	82460641		41.5862	95913790		48.5478	64844242
48.0204	82863911		41.6146	96273924		48.5452	65252082
48.0307	83268336		41.643	96634706		48.5426	65661575
48.0411	83673915		41.6714	96996135		48.5401	66072719
48.0514	84080647		41.6997	97358210		48.5377	66485517
48.0618	84488532		41.7281	97720929		48.5353	66899969
48.0722	84897567		41.7564	98084291		48.533	67316074
48.0826	85307753		41.7846	98448293		48.5307	67733835
48.093	85719087		41.8129	98812935		48.5285	68153250
48.1035	86131570		41.8411	99178215		48.5264	68574320
48.114	86545199		41.8694	99544131		48.5243	68997046
48.1245	86959975		41.8976	99910682		48.5223	69421428
48.135	87375894		41.9257	100000000		48.5203	69847467
48.1456	87792958		41.9539	101000000		48.5184	70275161
48.1561	88211164		41.982	101000000		48.5166	70704513
48.1667	88630511		42.0102	101000000		48.5148	71135521
48.1774	89050998		42.0382	102000000		48.5131	71568186
48.188	89472624		42.0663	102000000		48.5114	72002508
48.1987	89895387		42.0944	102000000		48.5098	72438487
48.2094	90319287		42.1224	103000000		48.5083	72876123
48.2201	90744322		42.1504	103000000		48.5068	73315416
48.2308	91170490		42.1784	104000000		48.5053	73756366
48.2416	91597791		42.2064	104000000		48.504	74198973
48.2524	92026222		42.2343	104000000		48.5027	74643236
48.2632	92455784		42.2623	105000000		48.5014	75089156
48.274	92886474		42.2901	105000000		48.5002	75536732
48.2849	93318290		42.318	105000000		48.4991	75985964
48.2958	93751232		42.3459	106000000		48.498	76436852
48.3067	94185298		42.3737	106000000		48.4969	76889394
48.3176	94620487		42.4016	107000000		48.496	77343592
48.3285	95056796		42.4294	107000000		48.495	77799445
48.3395	95494225		42.4571	107000000		48.4942	78256951
48.3505	95932772		42.4849	108000000		48.4934	78716111
48.3615	96372436		42.5126	108000000		48.4926	79176924
48.3725	96813215		42.5404	109000000		48.4919	79639389
48.3835	97255106		42.568	109000000		48.4913	80103506
48.3946	97698110		42.5957	109000000		48.4907	80569275
48.4057	98142224		42.6234	110000000		48.4902	81036694
48.4168	98587446		42.651	110000000		48.4897	81505763
48.428	99033775		42.6786	110000000		48.4893	81976480
48.4391	99481209		42.7062	111000000		48.4889	82448846
48.4503	99929747		42.7338	111000000		48.4886	82922860
48.4615	100000000		42.7613	112000000		48.4884	83398520
48.4727	101000000		42.7888	112000000		48.4882	83875825
48.4839	101000000		42.8163	112000000		48.488	84354776
48.4952	102000000		42.8438	113000000		48.4879	84835370
48.5065	102000000		42.8713	113000000		48.4879	85317606
48.5178	103000000		42.8987	114000000		48.4879	85801484
48.5291	103000000		42.9261	114000000		48.488	86287003
48.5404	104000000		42.9535	114000000		48.4881	86774161
48.5518	104000000		42.9809	115000000		48.4883	87262957
48.5632	104000000		43.0083	115000000		48.4885	87753390
48.5746	105000000		43.0356	115000000		48.4888	88245459
48.586	105000000		43.0629	116000000		48.4891	88739162
48.5974	106000000		43.0902	116000000		48.4895	89234498
48.6088	106000000		43.1175	117000000		48.4899	89731466
48.6203	107000000		43.1447	117000000		48.4904	90230064
48.6318	107000000		43.172	117000000		48.491	90730291
48.6433	108000000		43.1992	118000000		48.4915	91232145
48.6549	108000000		43.2263	118000000		48.4922	91735625
48.6664	109000000		43.2535	119000000		48.4929	92240729
48.678	109000000		43.2806	119000000		48.4936	92747456
48.6896	110000000		43.3077	119000000		48.4944	93255804
48.7012	110000000		43.3349	120000000		48.4953	93765772
48.7128	111000000		43.3619	120000000		48.4962	94277357
48.7244	111000000		43.389	121000000		48.4971	94790558
48.7361	111000000		43.416	121000000		48.4981	95305373
48.7478	112000000		43.443	121000000		48.4992	95821800
48.7595	112000000		43.47	122000000		48.5003	96339837
48.7712	113000000		43.497	122000000		48.5014	96859484
48.7829	113000000		43.5239	123000000		48.5026	97380736
48.7947	114000000		43.5508	123000000		48.5039	97903594
48.8064	114000000		43.5777	123000000		48.5052	98428053
48.8182	115000000		43.6046	124000000		48.5065	98954114
48.83	115000000		43.6315	124000000		48.5079	99481773
48.8418	116000000		43.6583	125000000		48.5094	100000000
48.8537	116000000		43.6851	125000000		48.5109	101000000
48.8655	117000000		43.7119	125000000		48.5124	101000000
48.8774	117000000		43.7387	126000000		48.514	102000000
48.8893	118000000		43.7655	126000000		48.5157	102000000
48.9012	118000000		43.7922	127000000		48.5173	103000000
48.9131	119000000		43.8189	127000000		48.5191	103000000
48.9251	119000000		43.8456	127000000		48.5209	104000000
48.937	120000000		43.8722	128000000		48.5227	104000000
48.949	120000000		43.8989	128000000		48.5246	105000000
48.961	121000000		43.9255	129000000		48.5265	105000000
48.973	121000000		43.9521	129000000		48.5285	106000000
48.985	122000000		43.9787	129000000		48.5305	106000000
48.997	122000000		44.0052	130000000		48.5326	107000000
49.0091	123000000		44.0318	130000000		48.5347	108000000
49.0212	123000000		44.0583	131000000		48.5369	108000000
49.0333	124000000		44.0848	131000000		48.5391	109000000
49.0454	124000000		44.1112	132000000		48.5413	109000000
49.0575	125000000		44.1377	132000000		48.5436	110000000
49.0696	125000000		44.1641	132000000		48.546	110000000
49.0818	126000000		44.1905	133000000		48.5484	111000000
49.0939	126000000		44.2169	133000000		48.5508	111000000
49.1061	127000000		44.2432	134000000		48.5533	112000000
49.1183	127000000		44.2696	134000000		48.5558	113000000
49.1305	128000000		44.2959	134000000		48.5584	113000000
49.1427	128000000		44.3222	135000000		48.561	114000000
49.155	129000000		44.3485	135000000		48.5637	114000000
49.1672	129000000		44.3747	136000000		48.5664	115000000
49.1795	130000000		44.4009	136000000		48.5692	115000000
49.1918	130000000		44.4271	137000000		48.572	116000000
49.2041	131000000		44.4533	137000000		48.5748	117000000
49.2164	131000000		44.4795	137000000		48.5777	117000000
49.2287	132000000		44.5056	138000000		48.5806	118000000
49.2411	132000000		44.5317	138000000		48.5836	118000000
49.2534	133000000		44.5578	139000000		48.5866	119000000
49.2658	133000000		44.5839	139000000		48.5897	120000000
49.2782	134000000		44.61	139000000		48.5928	120000000
49.2906	134000000		44.636	140000000		48.5959	121000000
49.303	135000000		44.662	140000000		48.5991	121000000
49.3154	136000000		44.688	141000000		48.6024	122000000
49.3279	136000000		44.714	141000000		48.6057	122000000
49.3403	137000000		44.7399	142000000		48.609	123000000
49.3528	137000000		44.7658	142000000		48.6123	124000000
49.3653	138000000		44.7917	142000000		48.6158	124000000
49.3778	138000000		44.8176	143000000		48.6192	125000000
49.3903	139000000		44.8434	143000000		48.6227	125000000
49.4028	139000000		44.8693	144000000		48.6262	126000000
49.4154	140000000		44.8951	144000000		48.6298	127000000
49.4279	140000000		44.9209	145000000		48.6335	127000000
49.4405	141000000		44.9466	145000000		48.6371	128000000
49.4531	141000000		44.9724	145000000		48.6408	128000000
49.4657	142000000		44.9981	146000000		48.6446	129000000
49.4783	142000000		45.0238	146000000		48.6484	130000000
49.4909	143000000		45.0495	147000000		48.6522	130000000
49.5035	143000000		45.0751	147000000		48.656	131000000
49.5162	144000000		45.1008	148000000		48.66	132000000
49.5288	145000000		45.1264	148000000		48.6639	132000000
49.5415	145000000		45.152	148000000		48.6679	133000000
49.5541	146000000		45.1775	149000000		48.6719	133000000
49.5669	146000000		45.2031	149000000		48.676	134000000
49.5795	147000000		45.2286	150000000		48.6801	135000000
49.5923	147000000		45.2541	150000000		48.6843	135000000
49.605	148000000		45.2796	151000000		48.6885	136000000
49.6177	148000000		45.3051	151000000		48.6927	136000000
49.6305	149000000		45.3305	151000000		48.697	137000000
49.6433	149000000		45.3559	152000000		48.7013	138000000
49.656	150000000		45.3813	152000000		48.7056	138000000
49.6688	151000000		45.4067	153000000		48.71	139000000
49.6816	151000000		45.432	153000000		48.7144	140000000
49.6944	152000000		45.4573	154000000		48.7189	140000000
49.7073	152000000		45.4826	154000000		48.7234	141000000
49.7201	153000000		45.5079	154000000		48.728	141000000
49.7329	153000000		45.5332	155000000		48.7325	142000000
49.7458	154000000		45.5584	155000000		48.7372	143000000
49.7587	154000000		45.5836	156000000		48.7418	143000000
49.7715	155000000		45.6088	156000000		48.7465	144000000
49.7844	155000000		45.634	157000000		48.7513	145000000
49.7973	156000000		45.6591	157000000		48.756	145000000
49.8103	157000000		45.6843	158000000		48.7608	146000000
49.8232	157000000		45.7094	158000000		48.7657	147000000
49.8361	158000000		45.7345	158000000		48.7706	147000000
49.849	158000000		45.7595	159000000		48.7755	148000000
49.862	159000000		45.7846	159000000		48.7805	149000000
49.875	159000000		45.8096	160000000		48.7855	149000000
49.8879	160000000		45.8346	160000000		48.7905	150000000
49.9009	161000000		45.8595	161000000		48.7956	151000000
49.9139	161000000		45.8845	161000000		48.8007	151000000
49.9269	162000000		45.9094	161000000		48.8058	152000000
49.94	162000000		45.9343	162000000		48.811	152000000
49.953	163000000		45.9592	162000000		48.8162	153000000
49.966	163000000		45.9841	163000000		48.8215	154000000
49.9791	164000000		46.0089	163000000		48.8268	154000000
49.9921	164000000		46.0337	164000000		48.8321	155000000
50.0052	165000000		46.0585	164000000		48.8375	156000000
50.0183	166000000		46.0833	165000000		48.8429	156000000
50.0314	166000000		46.108	165000000		48.8483	157000000
50.0444	167000000		46.1328	165000000		48.8538	158000000
50.0576	167000000		46.1575	166000000		48.8593	158000000
50.0707	168000000		46.1822	166000000		48.8648	159000000
50.0838	168000000		46.2068	167000000		48.8704	160000000
50.0969	169000000		46.2315	167000000		48.876	160000000
50.1101	170000000		46.2561	168000000		48.8816	161000000
50.1232	170000000		46.2807	168000000		48.8873	162000000
50.1364	171000000		46.3052	169000000		48.893	162000000
50.1496	171000000		46.3298	169000000		48.8988	163000000
50.1627	172000000		46.3543	169000000		48.9046	164000000
50.1759	173000000		46.3788	170000000		48.9104	165000000
50.1891	173000000		46.4033	170000000		48.9162	165000000
50.2023	174000000		46.4278	171000000		48.9221	166000000
50.2155	174000000		46.4522	171000000		48.928	167000000
50.2288	175000000		46.4766	172000000		48.934	167000000
50.242	175000000		46.501	172000000		48.94	168000000
50.2552	176000000		46.5254	173000000		48.946	169000000
50.2685	177000000		46.5497	173000000		48.952	169000000
50.2818	177000000		46.5741	174000000		48.9581	170000000
50.295	178000000		46.5984	174000000		48.9642	171000000
50.3083	178000000		46.6227	174000000		48.9704	171000000
50.3216	179000000		46.6469	175000000		48.9766	172000000
50.3349	180000000		46.6712	175000000		48.9828	173000000
50.3481	180000000		46.6954	176000000		48.989	173000000
50.3615	181000000		46.7196	176000000		48.9953	174000000
50.3748	181000000		46.7437	177000000		49.0016	175000000
50.3881	182000000		46.7679	177000000		49.008	176000000
50.4014	182000000		46.792	178000000		49.0143	176000000
50.4148	183000000		46.8161	178000000		49.0207	177000000
50.4281	184000000		46.8402	178000000		49.0272	178000000
50.4415	184000000		46.8643	179000000		49.0337	178000000
50.4548	185000000		46.8883	179000000		49.0402	179000000
50.4682	185000000		46.9124	180000000		49.0467	180000000
50.4816	186000000		46.9363	180000000		49.0533	180000000
50.4949	187000000		46.9603	181000000		49.0599	181000000
50.5083	187000000		46.9843	181000000		49.0665	182000000
50.5217	188000000		47.0082	182000000		49.0731	183000000
50.5351	188000000		47.0321	182000000		49.0798	183000000
50.5485	189000000		47.056	183000000		49.0866	184000000
50.562	190000000		47.0799	183000000		49.0933	185000000
50.5754	190000000		47.1037	183000000		49.1001	185000000
50.5888	191000000		47.1275	184000000		49.1069	186000000
50.6022	191000000		47.1513	184000000		49.1138	187000000
50.6157	192000000		47.1751	185000000		49.1206	188000000
50.6292	193000000		47.1989	185000000		49.1275	188000000
50.6426	193000000		47.2226	186000000		49.1345	189000000
50.6561	194000000		47.2463	186000000		49.1414	190000000
50.6695	194000000		47.27	187000000		49.1484	190000000
50.683	195000000		47.2936	187000000		49.1554	191000000
50.6965	196000000		47.3173	188000000		49.1625	192000000
50.71	196000000		47.3409	188000000		49.1696	193000000
50.7235	197000000		47.3645	189000000		49.1767	193000000
50.737	197000000		47.3881	189000000		49.1838	194000000
50.7505	198000000		47.4117	189000000		49.191	195000000
50.764	199000000		47.4352	190000000		49.1982	195000000
50.7775	199000000		47.4587	190000000		49.2054	196000000
50.7911	200000000		47.4822	191000000		49.2127	197000000
50.8046	200000000		47.5057	191000000		49.2199	198000000
50.8181	201000000		47.5291	192000000		49.2273	198000000
50.8317	202000000		47.5525	192000000		49.2346	199000000
50.8452	202000000		47.5759	193000000		49.242	200000000
50.8588	203000000		47.5993	193000000		49.2494	201000000
50.8723	203000000		47.6227	194000000		49.2568	201000000
50.8859	204000000		47.646	194000000		49.2642	202000000
50.8995	205000000		47.6693	194000000		49.2717	203000000
50.913	205000000		47.6926	195000000		49.2792	204000000
50.9266	206000000		47.7159	195000000		49.2868	204000000
50.9402	206000000		47.7391	196000000		49.2943	205000000
50.9538	207000000		47.7623	196000000		49.3019	206000000
50.9674	208000000		47.7855	197000000		49.3095	206000000
50.981	208000000		47.8087	197000000		49.3172	207000000
50.9946	209000000		47.8319	198000000		49.3248	208000000
51.0082	210000000		47.855	198000000		49.3325	209000000
51.0219	210000000		47.8781	199000000		49.3403	209000000
51.0355	211000000		47.9012	199000000		49.348	210000000
51.0491	211000000		47.9243	200000000		49.3558	211000000
51.0627	212000000		47.9474	200000000		49.3636	212000000
51.0764	213000000		47.9704	200000000		49.3714	212000000
51.09	213000000		47.9934	201000000		49.3793	213000000
51.1037	214000000		48.0164	201000000		49.3872	214000000
51.1173	214000000		48.0393	202000000		49.3951	215000000
51.131	215000000		48.0623	202000000		49.403	215000000
51.1446	216000000		48.0852	203000000		49.411	216000000
51.1583	216000000		48.1081	203000000		49.419	217000000
51.172	217000000		48.1309	204000000		49.427	218000000
51.1856	218000000		48.1538	204000000		49.435	218000000
51.1993	218000000		48.1766	205000000		49.4431	219000000
51.213	219000000		48.1994	205000000		49.4512	220000000
51.2267	219000000		48.2222	206000000		49.4593	221000000
51.2404	220000000		48.245	206000000		49.4674	221000000
51.2541	221000000		48.2677	206000000		49.4756	222000000
51.2678	221000000		48.2905	207000000		49.4838	223000000
51.2815	222000000		48.3132	207000000		49.492	224000000
51.2952	223000000		48.3358	208000000		49.5002	224000000
51.3089	223000000		48.3585	208000000		49.5085	225000000
51.3226	224000000		48.3811	209000000		49.5168	226000000
51.3363	224000000		48.4037	209000000		49.5251	227000000
51.35	225000000		48.4263	210000000		49.5334	227000000
51.3638	226000000		48.4489	210000000		49.5418	228000000
51.3775	226000000		48.4714	211000000		49.5502	229000000
51.3912	227000000		48.494	211000000		49.5586	230000000
51.4049	228000000		48.5165	212000000		49.567	230000000
51.4187	228000000		48.5389	212000000		49.5754	231000000
51.4324	229000000		48.5614	213000000		49.5839	232000000
51.4462	229000000		48.5838	213000000		49.5924	233000000
51.4599	230000000		48.6063	213000000		49.6009	234000000
51.4737	231000000		48.6287	214000000		49.6095	234000000
51.4874	231000000		48.651	214000000		49.6181	235000000
51.5012	232000000		48.6734	215000000		49.6267	236000000
51.5149	233000000		48.6957	215000000		49.6353	237000000
51.5287	233000000		48.718	216000000		49.6439	237000000
51.5425	234000000		48.7403	216000000		49.6526	238000000
51.5562	234000000		48.7626	217000000		49.6613	239000000
51.57	235000000		48.7848	217000000		49.67	240000000
51.5838	236000000		48.807	218000000		49.6787	240000000
51.5976	236000000		48.8292	218000000		49.6875	241000000
51.6113	237000000		48.8514	219000000		49.6962	242000000
51.6251	238000000		48.8736	219000000		49.705	243000000
51.6389	238000000		48.8957	220000000		49.7139	244000000
51.6527	239000000		48.9178	220000000		49.7227	244000000
51.6665	239000000		48.9399	220000000		49.7316	245000000
51.6803	240000000		48.962	221000000		49.7405	246000000
51.6941	241000000		48.984	221000000		49.7494	247000000
51.7079	241000000		49.006	222000000		49.7583	247000000
51.7217	242000000		49.028	222000000		49.7673	248000000
51.7355	243000000		49.05	223000000		49.7762	249000000
51.7493	243000000		49.072	223000000		49.7852	250000000
51.7631	244000000		49.0939	224000000		49.7942	250000000
51.7769	244000000		49.1158	224000000		49.8033	251000000
51.7907	245000000		49.1377	225000000		49.8123	252000000
51.8045	246000000		49.1596	225000000		49.8214	253000000
51.8183	246000000		49.1815	226000000		49.8305	254000000
51.8321	247000000		49.2033	226000000		49.8396	254000000
51.846	248000000		49.2251	227000000		49.8488	255000000
51.8598	248000000		49.2469	227000000		49.858	256000000
51.8736	249000000		49.2687	227000000		49.8671	257000000
51.8874	250000000		49.2904	228000000		49.8763	257000000
51.9012	250000000		49.3121	228000000		49.8856	258000000
51.9151	251000000		49.3338	229000000		49.8948	259000000
51.9289	251000000		49.3555	229000000		49.9041	260000000
51.9427	252000000		49.3772	230000000		49.9134	261000000
51.9566	253000000		49.3988	230000000		49.9227	261000000
51.9704	253000000		49.4204	231000000		49.932	262000000
51.9842	254000000		49.442	231000000		49.9413	263000000
51.9981	255000000		49.4636	232000000		49.9507	264000000
52.0119	255000000		49.4851	232000000		49.9601	264000000
52.0257	256000000		49.5067	233000000		49.9695	265000000
52.0396	256000000		49.5282	233000000		49.9789	266000000
52.0534	257000000		49.5497	234000000		49.9883	267000000
52.0673	258000000		49.5712	234000000		49.9978	268000000
52.0811	258000000		49.5926	234000000		50.0073	268000000
52.0949	259000000		49.614	235000000		50.0168	269000000
52.1088	260000000		49.6354	235000000		50.0263	270000000
52.1226	260000000		49.6568	236000000		50.0358	271000000
52.1365	261000000		49.6782	236000000		50.0454	271000000
52.1503	262000000		49.6995	237000000		50.055	272000000
52.1642	262000000		49.7208	237000000		50.0646	273000000
52.178	263000000		49.7421	238000000		50.0742	274000000
52.1919	263000000		49.7634	238000000		50.0838	275000000
52.2057	264000000		49.7846	239000000		50.0934	275000000
52.2196	265000000		49.8059	239000000		50.1031	276000000
52.2334	265000000		49.8271	240000000		50.1128	277000000
52.2473	266000000		49.8483	240000000		50.1225	278000000
52.2611	267000000		49.8695	241000000		50.1322	279000000
52.275	267000000		49.8906	241000000		50.142	279000000
52.2888	268000000		49.9117	242000000		50.1517	280000000
52.3027	269000000		49.9329	242000000		50.1615	281000000
52.3166	269000000		49.9539	242000000		50.1713	282000000
52.3304	270000000		49.975	243000000		50.1811	282000000
52.3443	270000000		49.996	243000000		50.1909	283000000
52.3581	271000000		50.0171	244000000		50.2008	284000000
52.372	272000000		50.0381	244000000		50.2106	285000000
52.3858	272000000		50.059	245000000		50.2205	286000000
52.3997	273000000		50.08	245000000		50.2304	286000000
52.4136	274000000		50.1009	246000000		50.2403	287000000
52.4274	274000000		50.1219	246000000		50.2503	288000000
52.4413	275000000		50.1427	247000000		50.2602	289000000
52.4551	276000000		50.1636	247000000		50.2702	290000000
52.469	276000000		50.1845	248000000		50.2801	290000000
52.4828	277000000		50.2053	248000000		50.2901	291000000
52.4967	277000000		50.2261	249000000		50.3002	292000000
52.5106	278000000		50.2469	249000000		50.3102	293000000
52.5244	279000000		50.2677	249000000		50.3202	293000000
52.5383	279000000		50.2884	250000000		50.3303	294000000
52.5521	280000000		50.3092	250000000		50.3404	295000000
52.566	281000000		50.3299	251000000		50.3505	296000000
52.5798	281000000		50.3506	251000000		50.3606	297000000
52.5937	282000000		50.3712	252000000		50.3707	297000000
52.6076	283000000		50.3919	252000000		50.3809	298000000
52.6214	283000000		50.4125	253000000		50.391	299000000
52.6353	284000000		50.4331	253000000		50.4012	300000000
52.6491	284000000		50.4537	254000000		50.4114	301000000
52.663	285000000		50.4742	254000000		50.4216	301000000
52.6768	286000000		50.4948	255000000		50.4318	302000000
52.6907	286000000		50.5153	255000000		50.4421	303000000
52.7045	287000000		50.5358	256000000		50.4523	304000000
52.7184	288000000		50.5563	256000000		50.4626	304000000
52.7322	288000000		50.5767	256000000		50.4729	305000000
52.7461	289000000		50.5972	257000000		50.4832	306000000
52.7599	290000000		50.6176	257000000		50.4935	307000000
52.7738	290000000		50.638	258000000		50.5038	308000000
52.7876	291000000		50.6584	258000000		50.5141	308000000
52.8015	291000000		50.6787	259000000		50.5245	309000000
52.8153	292000000		50.699	259000000		50.5349	310000000
52.8291	293000000		50.7194	260000000		50.5453	311000000
52.843	293000000		50.7397	260000000		50.5557	312000000
52.8568	294000000		50.7599	261000000		50.5661	312000000
52.8707	295000000		50.7802	261000000		50.5765	313000000
52.8845	295000000		50.8004	262000000		50.587	314000000
52.8983	296000000		50.8206	262000000		50.5974	315000000
52.9122	296000000		50.8408	262000000		50.6079	315000000
52.926	297000000		50.861	263000000		50.6184	316000000
52.9398	298000000		50.8811	263000000		50.6289	317000000
52.9537	298000000		50.9013	264000000		50.6394	318000000
52.9675	299000000		50.9214	264000000		50.6499	319000000
52.9813	300000000		50.9415	265000000		50.6605	319000000
52.9952	300000000		50.9615	265000000		50.671	320000000
53.009	301000000		50.9816	266000000		50.6816	321000000
53.0228	302000000		51.0016	266000000		50.6922	322000000
53.0367	302000000		51.0216	267000000		50.7028	323000000
53.0505	303000000		51.0416	267000000		50.7134	323000000
53.0643	303000000		51.0615	268000000		50.724	324000000
53.0781	304000000		51.0815	268000000		50.7347	325000000
53.0919	305000000		51.1014	269000000		50.7453	326000000
53.1058	305000000		51.1213	269000000		50.756	326000000
53.1196	306000000		51.1412	269000000		50.7666	327000000
53.1334	307000000		51.1611	270000000		50.7773	328000000
53.1472	307000000		51.1809	270000000		50.788	329000000
53.161	308000000		51.2007	271000000		50.7987	330000000
53.1748	308000000		51.2205	271000000		50.8095	330000000
53.1886	309000000		51.2403	272000000		50.8202	331000000
53.2024	310000000		51.2601	272000000		50.831	332000000
53.2162	310000000		51.2798	273000000		50.8417	333000000
53.23	311000000		51.2995	273000000		50.8525	333000000
53.2438	312000000		51.3192	274000000		50.8633	334000000
53.2576	312000000		51.3389	274000000		50.8741	335000000
53.2714	313000000		51.3586	275000000		50.8849	336000000
53.2852	313000000		51.3782	275000000		50.8958	337000000
53.299	314000000		51.3978	275000000		50.9066	337000000
53.3128	315000000		51.4175	276000000		50.9175	338000000
53.3266	315000000		51.437	276000000		50.9283	339000000
53.3404	316000000		51.4566	277000000		50.9392	340000000
53.3541	317000000		51.4761	277000000		50.9501	340000000
53.3679	317000000		51.4956	278000000		50.961	341000000
53.3817	318000000		51.5151	278000000		50.9719	342000000
53.3955	318000000		51.5346	279000000		50.9828	343000000
53.4093	319000000		51.5541	279000000		50.9938	344000000
53.423	320000000		51.5735	280000000		51.0047	344000000
53.4368	320000000		51.593	280000000		51.0157	345000000
53.4506	321000000		51.6123	280000000		51.0266	346000000
53.4643	322000000		51.6317	281000000		51.0376	347000000
53.4781	322000000		51.6511	281000000		51.0486	347000000
53.4918	323000000		51.6704	282000000		51.0596	348000000
53.5056	323000000		51.6898	282000000		51.0706	349000000
53.5194	324000000		51.7091	283000000		51.0817	350000000
53.5331	325000000		51.7283	283000000		51.0927	351000000
53.5468	325000000		51.7476	284000000		51.1037	351000000
53.5606	326000000		51.7668	284000000		51.1148	352000000
53.5743	327000000		51.7861	285000000		51.1259	353000000
53.5881	327000000		51.8053	285000000		51.1369	354000000
53.6018	328000000		51.8244	286000000		51.148	354000000
53.6156	328000000		51.8436	286000000		51.1591	355000000
53.6293	329000000		51.8628	286000000		51.1703	356000000
53.643	330000000		51.8819	287000000		51.1814	357000000
53.6568	330000000		51.901	287000000		51.1925	357000000
53.6705	331000000		51.9201	288000000		51.2037	358000000
53.6842	332000000		51.9391	288000000		51.2148	359000000
53.6979	332000000		51.9582	289000000		51.226	360000000
53.7116	333000000		51.9772	289000000		51.2371	360000000
53.7253	333000000		51.9962	290000000		51.2483	361000000
53.7391	334000000		52.0152	290000000		51.2595	362000000
53.7528	335000000		52.0342	291000000		51.2707	363000000
53.7665	335000000		52.0531	291000000		51.2819	364000000
53.7802	336000000		52.072	291000000		51.2931	364000000
53.7939	336000000		52.0909	292000000		51.3044	365000000
53.8076	337000000		52.1098	292000000		51.3156	366000000
53.8213	338000000		52.1287	293000000		51.3269	367000000
53.8349	338000000		52.1476	293000000		51.3381	367000000
53.8486	339000000		52.1664	294000000		51.3494	368000000
53.8623	339000000		52.1852	294000000		51.3607	369000000
53.876	340000000		52.204	295000000		51.372	370000000
53.8897	341000000		52.2228	295000000		51.3833	370000000
53.9034	341000000		52.2415	295000000		51.3946	371000000
53.917	342000000		52.2603	296000000		51.4059	372000000
53.9307	343000000		52.279	296000000		51.4172	373000000
53.9444	343000000		52.2977	297000000		51.4286	373000000
53.958	344000000		52.3163	297000000		51.4399	374000000
53.9717	344000000		52.335	298000000		51.4513	375000000
53.9853	345000000		52.3536	298000000		51.4626	376000000
53.999	346000000		52.3723	299000000		51.474	376000000
54.0126	346000000		52.3909	299000000		51.4854	377000000
54.0263	347000000		52.4094	300000000		51.4968	378000000
54.0399	347000000		52.428	300000000		51.5082	379000000
54.0535	348000000		52.4465	300000000		51.5196	379000000
54.0672	349000000		52.4651	301000000		51.531	380000000
54.0808	349000000		52.4836	301000000		51.5424	381000000
54.0944	350000000		52.5021	302000000		51.5538	382000000
54.108	350000000		52.5205	302000000		51.5653	382000000
54.1217	351000000		52.539	303000000		51.5767	383000000
54.1353	352000000		52.5574	303000000		51.5882	384000000
54.1489	352000000		52.5758	304000000		51.5996	385000000
54.1625	353000000		52.5942	304000000		51.6111	385000000
54.1761	353000000		52.6126	304000000		51.6226	386000000
54.1897	354000000		52.6309	305000000		51.6341	387000000
54.2033	355000000		52.6493	305000000		51.6456	388000000
54.2169	355000000		52.6676	306000000		51.6571	388000000
54.2305	356000000		52.6859	306000000		51.6686	389000000
54.2441	356000000		52.7041	307000000		51.6801	390000000
54.2577	357000000		52.7224	307000000		51.6916	391000000
54.2712	358000000		52.7406	308000000		51.7032	391000000
54.2848	358000000		52.7589	308000000		51.7147	392000000
54.2984	359000000		52.7771	308000000		51.7263	393000000
54.312	359000000		52.7952	309000000		51.7378	394000000
54.3255	360000000		52.8134	309000000		51.7494	394000000
54.3391	361000000		52.8316	310000000		51.761	395000000
54.3526	361000000		52.8497	310000000		51.7725	396000000
54.3662	362000000		52.8678	311000000		51.7841	396000000
54.3797	362000000		52.8859	311000000		51.7957	397000000
54.3933	363000000		52.904	312000000		51.8073	398000000
54.4068	364000000		52.922	312000000		51.8189	399000000
54.4203	364000000		52.94	312000000		51.8305	399000000
54.4339	365000000		52.9581	313000000		51.8421	400000000
54.4474	365000000		52.9761	313000000		51.8538	401000000
54.4609	366000000		52.994	314000000		51.8654	402000000
54.4744	367000000		53.012	314000000		51.8771	402000000
54.488	367000000		53.0299	315000000		51.8887	403000000
54.5015	368000000		53.0478	315000000		51.9004	404000000
54.515	368000000		53.0658	316000000		51.912	405000000
54.5285	369000000		53.0836	316000000		51.9237	405000000
54.542	369000000		53.1015	316000000		51.9354	406000000
54.5555	370000000		53.1194	317000000		51.947	407000000
54.569	371000000		53.1372	317000000		51.9587	407000000
54.5825	371000000		53.155	318000000		51.9704	408000000
54.5959	372000000		53.1728	318000000		51.9821	409000000
54.6094	372000000		53.1906	319000000		51.9938	410000000
54.6229	373000000		53.2083	319000000		52.0055	410000000
54.6364	374000000		53.2261	319000000		52.0173	411000000
54.6498	374000000		53.2438	320000000		52.029	412000000
54.6633	375000000		53.2615	320000000		52.0407	412000000
54.6767	375000000		53.2792	321000000		52.0525	413000000
54.6902	376000000		53.2968	321000000		52.0642	414000000
54.7037	376000000		53.3145	322000000		52.076	415000000
54.7171	377000000		53.3321	322000000		52.0877	415000000
54.7305	378000000		53.3497	323000000		52.0995	416000000
54.744	378000000		53.3673	323000000		52.1112	417000000
54.7574	379000000		53.3849	323000000		52.123	417000000
54.7708	379000000		53.4025	324000000		52.1348	418000000
54.7842	380000000		53.42	324000000		52.1466	419000000
54.7977	380000000		53.4375	325000000		52.1584	420000000
54.8111	381000000		53.455	325000000		52.1702	420000000
54.8245	382000000		53.4725	326000000		52.182	421000000
54.8379	382000000		53.49	326000000		52.1938	422000000
54.8513	383000000		53.5074	326000000		52.2056	422000000
54.8647	383000000		53.5249	327000000		52.2174	423000000
54.8781	384000000		53.5423	327000000		52.2292	424000000
54.8914	384000000		53.5597	328000000		52.2411	424000000
54.9048	385000000		53.5771	328000000		52.2529	425000000
54.9182	386000000		53.5944	329000000		52.2647	426000000
54.9316	386000000		53.6118	329000000		52.2766	427000000
54.9449	387000000		53.6291	329000000		52.2884	427000000
54.9583	387000000		53.6464	330000000		52.3003	428000000
54.9717	388000000		53.6637	330000000		52.3121	429000000
54.985	388000000		53.681	331000000		52.324	429000000
54.9984	389000000		53.6982	331000000		52.3359	430000000
55.0117	390000000		53.7155	332000000		52.3477	431000000
55.0251	390000000		53.7327	332000000		52.3596	431000000
55.0384	391000000		53.7499	332000000		52.3715	432000000
55.0517	391000000		53.7671	333000000		52.3834	433000000
55.065	392000000		53.7843	333000000		52.3952	433000000
55.0784	392000000		53.8014	334000000		52.4072	434000000
55.0917	393000000		53.8185	334000000		52.419	435000000
55.105	393000000		53.8357	335000000		52.431	436000000
55.1183	394000000		53.8528	335000000		52.4429	436000000
55.1316	395000000		53.8698	335000000		52.4548	437000000
55.1449	395000000		53.8869	336000000		52.4667	438000000
55.1582	396000000		53.9039	336000000		52.4786	438000000
55.1715	396000000		53.921	337000000		52.4905	439000000
55.1848	397000000		53.938	337000000		52.5025	440000000
55.198	397000000		53.955	337000000		52.5144	440000000
55.2113	398000000		53.9719	338000000		52.5263	441000000
55.2246	398000000		53.9889	338000000		52.5383	442000000
55.2378	399000000		54.0059	339000000		52.5502	442000000
55.2511	400000000		54.0228	339000000		52.5622	443000000
55.2643	400000000		54.0397	340000000		52.5741	444000000
55.2776	401000000		54.0566	340000000		52.5861	444000000
55.2908	401000000		54.0734	340000000		52.5981	445000000
55.3041	402000000		54.0903	341000000		52.61	446000000
55.3173	402000000		54.1071	341000000		52.622	446000000
55.3305	403000000		54.124	342000000		52.634	447000000
55.3438	403000000		54.1408	342000000		52.6459	448000000
55.357	404000000		54.1576	343000000		52.6579	448000000
55.3702	404000000		54.1743	343000000		52.6699	449000000
55.3834	405000000		54.1911	343000000		52.6819	450000000
55.3966	405000000		54.2078	344000000		52.6939	450000000
55.4098	406000000		54.2245	344000000		52.7059	451000000
55.423	407000000		54.2412	345000000		52.7179	452000000
55.4362	407000000		54.2579	345000000		52.7299	452000000
55.4494	408000000		54.2746	345000000		52.7419	453000000
55.4625	408000000		54.2912	346000000		52.7539	454000000
55.4757	409000000		54.3079	346000000		52.7659	454000000
55.4889	409000000		54.3245	347000000		52.7779	455000000
55.502	410000000		54.3411	347000000		52.7899	456000000
55.5152	410000000		54.3577	347000000		52.8019	456000000
55.5284	411000000		54.3743	348000000		52.814	457000000
55.5415	411000000		54.3908	348000000		52.826	458000000
55.5547	412000000		54.4074	349000000		52.838	458000000
55.5678	412000000		54.4239	349000000		52.8501	459000000
55.5809	413000000		54.4404	350000000		52.8621	459000000
55.594	413000000		54.4569	350000000		52.8741	460000000
55.6072	414000000		54.4733	350000000		52.8862	461000000
55.6203	415000000		54.4898	351000000		52.8982	461000000
55.6334	415000000		54.5062	351000000		52.9103	462000000
55.6465	416000000		54.5226	352000000		52.9223	463000000
55.6596	416000000		54.5391	352000000		52.9344	463000000
55.6727	417000000		54.5554	352000000		52.9464	464000000
55.6858	417000000		54.5718	353000000		52.9585	465000000
55.6989	418000000		54.5882	353000000		52.9706	465000000
55.712	418000000		54.6045	354000000		52.9826	466000000
55.725	419000000		54.6208	354000000		52.9947	467000000
55.7381	419000000		54.6371	354000000		53.0067	467000000
55.7512	420000000		54.6534	355000000		53.0188	468000000
55.7642	420000000		54.6697	355000000		53.0309	468000000
55.7773	421000000		54.6859	356000000		53.043	469000000
55.7903	421000000		54.7022	356000000		53.055	470000000
55.8034	422000000		54.7184	356000000		53.0671	470000000
55.8164	422000000		54.7346	357000000		53.0792	471000000
55.8295	423000000		54.7508	357000000		53.0913	472000000
55.8425	423000000		54.767	358000000		53.1034	472000000
55.8555	424000000		54.7831	358000000		53.1155	473000000
55.8685	424000000		54.7993	358000000		53.1275	473000000
55.8815	425000000		54.8154	359000000		53.1397	474000000
55.8945	425000000		54.8315	359000000		53.1517	475000000
55.9075	426000000		54.8476	360000000		53.1638	475000000
55.9205	426000000		54.8637	360000000		53.1759	476000000
55.9335	427000000		54.8798	360000000		53.188	476000000
55.9465	427000000		54.8958	361000000		53.2001	477000000
55.9595	428000000		54.9118	361000000		53.2122	478000000
55.9725	428000000		54.9279	362000000		53.2244	478000000
55.9854	429000000		54.9439	362000000		53.2364	479000000
55.9984	429000000		54.9598	362000000		53.2486	480000000
56.0114	430000000		54.9758	363000000		53.2607	480000000
56.0243	430000000		54.9918	363000000		53.2728	481000000
56.0373	431000000		55.0077	364000000		53.2849	481000000
56.0502	431000000		55.0236	364000000		53.297	482000000
56.0632	432000000		55.0395	364000000		53.3091	483000000
56.0761	432000000		55.0554	365000000		53.3212	483000000
56.089	433000000		55.0713	365000000		53.3334	484000000
56.1019	433000000		55.0872	366000000		53.3455	484000000
56.1148	434000000		55.103	366000000		53.3576	485000000
56.1278	434000000		55.1188	366000000		53.3698	486000000
56.1407	435000000		55.1346	367000000		53.3819	486000000
56.1536	435000000		55.1504	367000000		53.394	487000000
56.1665	436000000		55.1662	368000000		53.4061	487000000
56.1793	436000000		55.182	368000000		53.4183	488000000
56.1922	437000000		55.1977	368000000		53.4304	489000000
56.2051	437000000		55.2135	369000000		53.4425	489000000
56.218	438000000		55.2292	369000000		53.4547	490000000
56.2308	438000000		55.2449	369000000		53.4668	490000000
56.2437	439000000		55.2606	370000000		53.4789	491000000
56.2566	439000000		55.2762	370000000		53.4911	491000000
56.2694	440000000		55.2919	371000000		53.5032	492000000
56.2823	440000000		55.3075	371000000		53.5153	493000000
56.2951	441000000		55.3232	371000000		53.5275	493000000
56.3079	441000000		55.3388	372000000		53.5396	494000000
56.3208	442000000		55.3544	372000000		53.5518	494000000
56.3336	442000000		55.37	373000000		53.5639	495000000
56.3464	443000000		55.3855	373000000		53.5761	496000000
56.3592	443000000		55.4011	373000000		53.5882	496000000
56.372	444000000		55.4166	374000000		53.6003	497000000
56.3849	444000000		55.4322	374000000		53.6125	497000000
56.3976	444000000		55.4477	374000000		53.6246	498000000
56.4104	445000000		55.4631	375000000		53.6368	498000000
56.4232	445000000		55.4786	375000000		53.6489	499000000
56.436	446000000		55.4941	376000000		53.6611	499000000
56.4488	446000000		55.5095	376000000		53.6732	500000000
56.4616	447000000		55.525	376000000		53.6854	501000000
56.4743	447000000		55.5404	377000000		53.6975	501000000
56.4871	448000000		55.5558	377000000		53.7097	502000000
56.4998	448000000		55.5712	378000000		53.7218	502000000
56.5126	449000000		55.5865	378000000		53.734	503000000
56.5253	449000000		55.6019	378000000		53.7461	503000000
56.5381	450000000		55.6172	379000000		53.7583	504000000
56.5508	450000000		55.6326	379000000		53.7704	505000000
56.5635	450000000		55.6479	379000000		53.7826	505000000
56.5762	451000000		55.6632	380000000		53.7947	506000000
56.589	451000000		55.6785	380000000		53.8069	506000000
56.6017	452000000		55.6937	381000000		53.819	507000000
56.6144	452000000		55.709	381000000		53.8312	507000000
56.6271	453000000		55.7242	381000000		53.8434	508000000
56.6398	453000000		55.7395	382000000		53.8555	508000000
56.6525	454000000		55.7547	382000000		53.8677	509000000
56.6651	454000000		55.7699	382000000		53.8798	509000000
56.6778	455000000		55.7851	383000000		53.892	510000000
56.6905	455000000		55.8002	383000000		53.9041	511000000
56.7032	455000000		55.8154	384000000		53.9163	511000000
56.7158	456000000		55.8305	384000000		53.9284	512000000
56.7285	456000000		55.8456	384000000		53.9406	512000000
56.7411	457000000		55.8608	385000000		53.9528	513000000
56.7538	457000000		55.8759	385000000		53.9649	513000000
56.7664	458000000		55.8909	385000000		53.9771	514000000
56.779	458000000		55.906	386000000		53.9892	514000000
56.7917	459000000		55.9211	386000000		54.0014	515000000
56.8043	459000000		55.9361	386000000		54.0135	515000000
56.8169	459000000		55.9511	387000000		54.0257	516000000
56.8295	460000000		55.9661	387000000		54.0378	516000000
56.8421	460000000		55.9811	388000000		54.05	517000000
56.8547	461000000		55.9961	388000000		54.0621	517000000
56.8673	461000000		56.0111	388000000		54.0743	518000000
56.8799	462000000		56.026	389000000		54.0864	518000000
56.8925	462000000		56.041	389000000		54.0986	519000000
56.9051	462000000		56.0559	389000000		54.1108	520000000
56.9177	463000000		56.0708	390000000		54.1229	520000000
56.9302	463000000		56.0857	390000000		54.1351	521000000
56.9428	464000000		56.1006	390000000		54.1472	521000000
56.9554	464000000		56.1155	391000000		54.1594	522000000
56.9679	465000000		56.1304	391000000		54.1715	522000000
56.9804	465000000		56.1452	392000000		54.1837	523000000
56.993	465000000		56.16	392000000		54.1958	523000000
57.0055	466000000		56.1748	392000000		54.208	524000000
57.0181	466000000		56.1897	393000000		54.2201	524000000
57.0306	467000000		56.2045	393000000		54.2323	525000000
57.0431	467000000		56.2192	393000000		54.2444	525000000
57.0556	468000000		56.234	394000000		54.2565	526000000
57.0681	468000000		56.2487	394000000		54.2687	526000000
57.0806	468000000		56.2635	394000000		54.2808	527000000
57.0931	469000000		56.2782	395000000		54.293	527000000
57.1056	469000000		56.2929	395000000		54.3051	528000000
57.1181	470000000		56.3076	395000000		54.3173	528000000
57.1306	470000000		56.3223	396000000		54.3294	529000000
57.1431	470000000		56.337	396000000		54.3415	529000000
57.1555	471000000		56.3516	396000000		54.3537	530000000
57.168	471000000		56.3663	397000000		54.3658	530000000
57.1805	472000000		56.3809	397000000		54.378	531000000
57.1929	472000000		56.3955	398000000		54.3901	531000000
57.2054	473000000		56.4101	398000000		54.4022	532000000
57.2178	473000000		56.4247	398000000		54.4144	532000000
57.2303	473000000		56.4393	399000000		54.4265	532000000
57.2427	474000000		56.4538	399000000		54.4386	533000000
57.2551	474000000		56.4684	399000000		54.4508	533000000
57.2675	475000000		56.4829	400000000		54.4629	534000000
57.28	475000000		56.4974	400000000		54.475	534000000
57.2924	475000000		56.5119	400000000		54.4872	535000000
57.3048	476000000		56.5264	401000000		54.4993	535000000
57.3172	476000000		56.5409	401000000		54.5114	536000000
57.3296	477000000		56.5554	401000000		54.5235	536000000
57.342	477000000		56.5698	402000000		54.5357	537000000
57.3544	477000000		56.5843	402000000		54.5478	537000000
57.3668	478000000		56.5987	402000000		54.5599	538000000
57.3791	478000000		56.6131	403000000		54.572	538000000
57.3915	478000000		56.6275	403000000		54.5842	539000000
57.4039	479000000		56.6419	403000000		54.5963	539000000
57.4162	479000000		56.6563	404000000		54.6084	540000000
57.4286	480000000		56.6707	404000000		54.6205	540000000
57.4409	480000000		56.685	404000000		54.6326	540000000
57.4533	480000000		56.6994	405000000		54.6447	541000000
57.4656	481000000		56.7137	405000000		54.6568	541000000
57.4779	481000000		56.728	405000000		54.669	542000000
57.4903	482000000		56.7423	406000000		54.681	542000000
57.5026	482000000		56.7566	406000000		54.6932	543000000
57.5149	482000000		56.7709	406000000		54.7053	543000000
57.5272	483000000		56.7852	407000000		54.7174	544000000
57.5395	483000000		56.7994	407000000		54.7295	544000000
57.5518	483000000		56.8137	407000000		54.7416	545000000
57.5641	484000000		56.8279	408000000		54.7537	545000000
57.5764	484000000		56.8421	408000000		54.7658	545000000
57.5887	485000000		56.8563	408000000		54.7779	546000000
57.601	485000000		56.8705	409000000		54.79	546000000
57.6133	485000000		56.8847	409000000		54.8021	547000000
57.6255	486000000		56.8989	409000000		54.8141	547000000
57.6378	486000000		56.913	410000000		54.8262	548000000
57.6501	486000000		56.9272	410000000		54.8383	548000000
57.6623	487000000		56.9413	410000000		54.8504	549000000
57.6746	487000000		56.9554	411000000		54.8625	549000000
57.6868	487000000		56.9695	411000000		54.8746	549000000
57.699	488000000		56.9836	411000000		54.8867	550000000
57.7113	488000000		56.9977	412000000		54.8987	550000000
57.7235	489000000		57.0118	412000000		54.9108	551000000
57.7357	489000000		57.0258	412000000		54.9229	551000000
57.748	489000000		57.0399	413000000		54.935	552000000
57.7602	490000000		57.0539	413000000		54.9471	552000000
57.7724	490000000		57.0679	413000000		54.9591	552000000
57.7846	490000000		57.0819	414000000		54.9712	553000000
57.7968	491000000		57.0959	414000000		54.9833	553000000
57.809	491000000		57.1099	414000000		54.9953	554000000
57.8212	491000000		57.1239	415000000		55.0074	554000000
57.8334	492000000		57.1379	415000000		55.0195	554000000
57.8455	492000000		57.1518	415000000		55.0315	555000000
57.8577	492000000		57.1657	416000000		55.0436	555000000
57.8699	493000000		57.1797	416000000		55.0556	556000000
57.882	493000000		57.1936	416000000		55.0677	556000000
57.8942	493000000		57.2075	416000000		55.0797	557000000
57.9063	494000000		57.2214	417000000		55.0918	557000000
57.9185	494000000		57.2353	417000000		55.1038	557000000
57.9306	495000000		57.2491	417000000		55.1159	558000000
57.9428	495000000		57.263	418000000		55.1279	558000000
57.9549	495000000		57.2768	418000000		55.14	559000000
57.967	496000000		57.2907	418000000		55.152	559000000
57.9792	496000000		57.3045	419000000		55.1641	559000000
57.9913	496000000		57.3183	419000000		55.1761	560000000
58.0034	497000000		57.3321	419000000		55.1881	560000000
58.0155	497000000		57.3459	420000000		55.2002	561000000
58.0276	497000000		57.3597	420000000		55.2122	561000000
58.0397	498000000		57.3734	420000000		55.2242	561000000
58.0518	498000000		57.3872	421000000		55.2362	562000000
58.0639	498000000		57.4009	421000000		55.2483	562000000
58.076	499000000		57.4147	421000000		55.2603	562000000
58.088	499000000		57.4284	421000000		55.2723	563000000
58.1001	499000000		57.4421	422000000		55.2843	563000000
58.1122	499000000		57.4558	422000000		55.2963	564000000
58.1243	500000000		57.4695	422000000		55.3083	564000000
58.1363	500000000		57.4832	423000000		55.3204	564000000
58.1484	500000000		57.4968	423000000		55.3324	565000000
58.1604	501000000		57.5105	423000000		55.3444	565000000
58.1725	501000000		57.5241	424000000		55.3564	566000000
58.1845	501000000		57.5377	424000000		55.3684	566000000
58.1965	502000000		57.5514	424000000		55.3804	566000000
58.2086	502000000		57.565	424000000		55.3924	567000000
58.2206	502000000		57.5786	425000000		55.4044	567000000
58.2326	503000000		57.5922	425000000		55.4164	567000000
58.2446	503000000		57.6057	425000000		55.4284	568000000
58.2566	503000000		57.6193	426000000		55.4403	568000000
58.2686	504000000		57.6329	426000000		55.4523	568000000
58.2806	504000000		57.6464	426000000		55.4643	569000000
58.2926	504000000		57.6599	427000000		55.4763	569000000
58.3046	505000000		57.6735	427000000		55.4883	570000000
58.3166	505000000		57.687	427000000		55.5003	570000000
58.3286	505000000		57.7005	427000000		55.5122	570000000
58.3406	505000000		57.714	428000000		55.5242	571000000
58.3526	506000000		57.7274	428000000		55.5362	571000000
58.3645	506000000		57.7409	428000000		55.5481	571000000
58.3765	506000000		57.7544	429000000		55.5601	572000000
58.3884	507000000		57.7678	429000000		55.572	572000000
58.4004	507000000		57.7813	429000000		55.584	572000000
58.4124	507000000		57.7947	429000000		55.596	573000000
58.4243	508000000		57.8081	430000000		55.6079	573000000
58.4362	508000000		57.8215	430000000		55.6199	573000000
58.4482	508000000		57.8349	430000000		55.6318	574000000
58.4601	508000000		57.8483	431000000		55.6438	574000000
58.472	509000000		57.8617	431000000		55.6557	574000000
58.484	509000000		57.8751	431000000		55.6676	575000000
58.4959	509000000		57.8884	431000000		55.6796	575000000
58.5078	510000000		57.9018	432000000		55.6915	575000000
58.5197	510000000		57.9151	432000000		55.7034	576000000
58.5316	510000000		57.9284	432000000		55.7154	576000000
58.5435	510000000		57.9417	433000000		55.7273	577000000
58.5554	511000000		57.955	433000000		55.7392	577000000
58.5673	511000000		57.9683	433000000		55.7512	577000000
58.5792	511000000		57.9816	433000000		55.7631	577000000
58.5911	512000000		57.9949	434000000		55.775	578000000
58.6029	512000000		58.0082	434000000		55.7869	578000000
58.6148	512000000		58.0214	434000000		55.7988	578000000
58.6267	512000000		58.0347	435000000		55.8107	579000000
58.6385	513000000		58.0479	435000000		55.8226	579000000
58.6504	513000000		58.0611	435000000		55.8345	579000000
58.6623	513000000		58.0744	435000000		55.8464	580000000
58.6741	513000000		58.0876	436000000		55.8583	580000000
58.6859	514000000		58.1007	436000000		55.8702	580000000
58.6978	514000000		58.1139	436000000		55.8821	581000000
58.7096	514000000		58.1271	437000000		55.894	581000000
58.7215	514000000		58.1403	437000000		55.9059	581000000
58.7333	515000000		58.1534	437000000		55.9178	582000000
58.7451	515000000		58.1666	437000000		55.9297	582000000
58.7569	515000000		58.1797	438000000		55.9415	582000000
58.7688	516000000		58.1929	438000000		55.9534	583000000
58.7806	516000000		58.206	438000000		55.9653	583000000
58.7924	516000000		58.2191	438000000		55.9772	583000000
58.8042	516000000		58.2322	439000000		55.989	584000000
58.816	517000000		58.2453	439000000		56.0009	584000000
58.8278	517000000		58.2584	439000000		56.0128	584000000
58.8396	517000000		58.2714	439000000		56.0246	584000000
58.8513	517000000		58.2845	440000000		56.0365	585000000
58.8631	518000000		58.2976	440000000		56.0483	585000000
58.8749	518000000		58.3106	440000000		56.0602	585000000
58.8867	518000000		58.3236	441000000		56.072	586000000
58.8985	518000000		58.3367	441000000		56.0839	586000000
58.9102	519000000		58.3497	441000000		56.0957	586000000
58.922	519000000		58.3627	441000000		56.1076	586000000
58.9337	519000000		58.3757	442000000		56.1194	587000000
58.9455	519000000		58.3887	442000000		56.1312	587000000
58.9573	520000000		58.4017	442000000		56.1431	587000000
58.969	520000000		58.4146	442000000		56.1549	588000000
58.9807	520000000		58.4276	443000000		56.1667	588000000
58.9925	520000000		58.4406	443000000		56.1785	588000000
59.0042	520000000		58.4535	443000000		56.1904	588000000
59.0159	521000000		58.4664	443000000		56.2022	589000000
59.0277	521000000		58.4794	444000000		56.214	589000000
59.0394	521000000		58.4923	444000000		56.2258	589000000
59.0511	521000000		58.5052	444000000		56.2376	590000000
59.0628	522000000		58.5181	444000000		56.2494	590000000
59.0745	522000000		58.531	445000000		56.2612	590000000
59.0862	522000000		58.5439	445000000		56.273	590000000
59.0979	522000000		58.5568	445000000		56.2848	591000000
59.1096	523000000		58.5696	445000000		56.2966	591000000
59.1213	523000000		58.5825	446000000		56.3084	591000000
59.133	523000000		58.5953	446000000		56.3202	591000000
59.1447	523000000		58.6082	446000000		56.332	592000000
59.1564	523000000		58.621	446000000		56.3438	592000000
59.1681	524000000		58.6338	447000000		56.3555	592000000
59.1797	524000000		58.6466	447000000		56.3673	593000000
59.1914	524000000		58.6594	447000000		56.3791	593000000
59.2031	524000000		58.6722	447000000		56.3909	593000000
59.2147	525000000		58.685	448000000		56.4026	593000000
59.2264	525000000		58.6978	448000000		56.4144	594000000
59.2381	525000000		58.7106	448000000		56.4261	594000000
59.2497	525000000		58.7234	448000000		56.4379	594000000
59.2614	525000000		58.7361	449000000		56.4497	594000000
59.273	526000000		58.7488	449000000		56.4614	595000000
59.2846	526000000		58.7616	449000000		56.4732	595000000
59.2963	526000000		58.7743	449000000		56.4849	595000000
59.3079	526000000		58.7871	450000000		56.4967	595000000
59.3195	526000000		58.7998	450000000		56.5084	596000000
59.3312	527000000		58.8125	450000000		56.5201	596000000
59.3428	527000000		58.8252	450000000		56.5319	596000000
59.3544	527000000		58.8379	451000000		56.5436	596000000
59.366	527000000		58.8505	451000000		56.5553	597000000
59.3776	527000000		58.8632	451000000		56.567	597000000
59.3892	528000000		58.8759	451000000		56.5788	597000000
59.4008	528000000		58.8886	451000000		56.5905	597000000
59.4124	528000000		58.9012	452000000		56.6022	597000000
59.424	528000000		58.9138	452000000		56.6139	598000000
59.4356	528000000		58.9265	452000000		56.6256	598000000
59.4472	529000000		58.9391	452000000		56.6373	598000000
59.4588	529000000		58.9517	453000000		56.649	598000000
59.4704	529000000		58.9643	453000000		56.6607	599000000
59.482	529000000		58.9769	453000000		56.6724	599000000
59.4936	529000000		58.9895	453000000		56.6841	599000000
59.5051	530000000		59.0021	454000000		56.6958	599000000
59.5167	530000000		59.0147	454000000		56.7075	600000000
59.5283	530000000		59.0273	454000000		56.7192	600000000
59.5398	530000000		59.0399	454000000		56.7309	600000000
59.5514	530000000		59.0524	454000000		56.7426	600000000
59.563	531000000		59.065	455000000		56.7542	600000000
59.5745	531000000		59.0775	455000000		56.7659	601000000
59.5861	531000000		59.09	455000000		56.7776	601000000
59.5976	531000000		59.1026	455000000		56.7892	601000000
59.6091	531000000		59.1151	456000000		56.8009	601000000
59.6207	531000000		59.1276	456000000		56.8126	602000000
59.6322	532000000		59.1401	456000000		56.8242	602000000
59.6438	532000000		59.1526	456000000		56.8359	602000000
59.6553	532000000		59.1651	456000000		56.8475	602000000
59.6668	532000000		59.1776	457000000		56.8592	602000000
59.6783	532000000		59.1901	457000000		56.8708	603000000
59.6899	532000000		59.2026	457000000		56.8825	603000000
59.7014	533000000		59.215	457000000		56.8941	603000000
59.7129	533000000		59.2275	458000000		56.9057	603000000
59.7244	533000000		59.2399	458000000		56.9174	603000000
59.7359	533000000		59.2524	458000000		56.929	604000000
59.7474	533000000		59.2648	458000000		56.9406	604000000
59.7589	533000000		59.2772	458000000		56.9522	604000000
59.7704	534000000		59.2897	459000000		56.9639	604000000
59.7819	534000000		59.3021	459000000		56.9755	604000000
59.7934	534000000		59.3145	459000000		56.9871	605000000
59.8049	534000000		59.3269	459000000		56.9987	605000000
59.8164	534000000		59.3393	459000000		57.0103	605000000
59.8279	534000000		59.3517	460000000		57.0219	605000000
59.8394	535000000		59.364	460000000		57.0335	605000000
59.8509	535000000		59.3764	460000000		57.0451	605000000
59.8623	535000000		59.3888	460000000		57.0567	606000000
59.8738	535000000		59.4012	460000000		57.0683	606000000
59.8853	535000000		59.4135	461000000		57.0799	606000000
59.8967	535000000		59.4258	461000000		57.0915	606000000
59.9082	535000000		59.4382	461000000		57.1031	606000000
59.9197	536000000		59.4505	461000000		57.1147	607000000
59.9311	536000000		59.4629	462000000		57.1262	607000000
59.9426	536000000		59.4752	462000000		57.1378	607000000
59.954	536000000		59.4875	462000000		57.1494	607000000
59.9655	536000000		59.4998	462000000		57.161	607000000
59.9769	536000000		59.5121	462000000		57.1725	607000000
59.9884	536000000		59.5244	463000000		57.1841	608000000
59.9998	537000000		59.5367	463000000		57.1957	608000000
60.0113	537000000		59.549	463000000		57.2072	608000000
60.0227	537000000		59.5613	463000000		57.2188	608000000
60.0341	537000000		59.5735	463000000		57.2303	608000000
60.0456	537000000		59.5858	463000000		57.2419	608000000
60.057	537000000		59.5981	464000000		57.2534	609000000
60.0684	537000000		59.6103	464000000		57.2649	609000000
60.0799	537000000		59.6225	464000000		57.2765	609000000
60.0913	538000000		59.6348	464000000		57.288	609000000
60.1027	538000000		59.647	464000000		57.2996	609000000
60.1141	538000000		59.6593	465000000		57.3111	609000000
60.1255	538000000		59.6715	465000000		57.3226	610000000
60.1369	538000000		59.6837	465000000		57.3341	610000000
60.1484	538000000		59.6959	465000000		57.3457	610000000
60.1598	538000000		59.7081	465000000		57.3572	610000000
60.1712	538000000		59.7203	466000000		57.3687	610000000
60.1826	539000000		59.7325	466000000		57.3802	610000000
60.194	539000000		59.7447	466000000		57.3917	611000000
60.2054	539000000		59.7569	466000000		57.4032	611000000
60.2168	539000000		59.769	466000000		57.4147	611000000
60.2281	539000000		59.7812	466000000		57.4262	611000000
60.2395	539000000		59.7934	467000000		57.4377	611000000
60.2509	539000000		59.8055	467000000		57.4492	611000000
60.2623	539000000		59.8177	467000000		57.4607	611000000
60.2737	540000000		59.8298	467000000		57.4722	612000000
60.2851	540000000		59.842	467000000		57.4837	612000000
60.2965	540000000		59.8541	468000000		57.4952	612000000
60.3078	540000000		59.8662	468000000		57.5066	612000000
60.3192	540000000		59.8784	468000000		57.5181	612000000
60.3306	540000000		59.8905	468000000		57.5296	612000000
60.342	540000000		59.9026	468000000		57.541	612000000
60.3533	540000000		59.9147	468000000		57.5525	612000000
60.3647	540000000		59.9268	469000000		57.564	613000000
60.3761	540000000		59.9389	469000000		57.5754	613000000
60.3874	541000000		59.951	469000000		57.5869	613000000
60.3988	541000000		59.9631	469000000		57.5984	613000000
60.4101	541000000		59.9752	469000000		57.6098	613000000
60.4215	541000000		59.9872	469000000		57.6213	613000000
60.4329	541000000		59.9993	470000000		57.6327	613000000
60.4442	541000000		60.0114	470000000		57.6442	614000000
60.4556	541000000		60.0234	470000000		57.6556	614000000
60.4669	541000000		60.0355	470000000		57.667	614000000
60.4783	541000000		60.0476	470000000		57.6785	614000000
60.4896	541000000		60.0596	471000000		57.6899	614000000
60.5009	541000000		60.0716	471000000		57.7013	614000000
60.5123	542000000		60.0837	471000000		57.7127	614000000
60.5236	542000000		60.0957	471000000		57.7242	614000000
60.535	542000000		60.1077	471000000		57.7356	614000000
60.5463	542000000		60.1198	471000000		57.747	615000000
60.5576	542000000		60.1318	471000000		57.7584	615000000
60.569	542000000		60.1438	472000000		57.7698	615000000
60.5803	542000000		60.1558	472000000		57.7812	615000000
60.5916	542000000		60.1678	472000000		57.7927	615000000
60.6029	542000000		60.1798	472000000		57.804	615000000
60.6143	542000000		60.1918	472000000		57.8154	615000000
60.6256	542000000		60.2038	472000000		57.8269	615000000
60.6369	542000000		60.2157	473000000		57.8382	615000000
60.6482	543000000		60.2277	473000000		57.8496	616000000
60.6596	543000000		60.2397	473000000		57.861	616000000
60.6709	543000000		60.2517	473000000		57.8724	616000000
60.6822	543000000		60.2636	473000000		57.8838	616000000
60.6935	543000000		60.2756	473000000		57.8952	616000000
60.7048	543000000		60.2876	474000000		57.9066	616000000
60.7161	543000000		60.2995	474000000		57.9179	616000000
60.7274	543000000		60.3115	474000000		57.9293	616000000
60.7387	543000000		60.3234	474000000		57.9407	616000000
60.7501	543000000		60.3353	474000000		57.952	616000000
60.7614	543000000		60.3473	474000000		57.9634	617000000
60.7727	543000000		60.3592	474000000		57.9748	617000000
60.784	543000000		60.3711	475000000		57.9861	617000000
60.7953	543000000		60.383	475000000		57.9975	617000000
60.8066	543000000		60.395	475000000		58.0088	617000000
60.8179	543000000		60.4069	475000000		58.0202	617000000
60.8291	544000000		60.4188	475000000		58.0315	617000000
60.8404	544000000		60.4307	475000000		58.0429	617000000
60.8517	544000000		60.4426	475000000		58.0542	617000000
60.863	544000000		60.4545	476000000		58.0656	617000000
60.8743	544000000		60.4664	476000000		58.0769	617000000
60.8856	544000000		60.4783	476000000		58.0882	617000000
60.8969	544000000		60.4901	476000000		58.0996	618000000
60.9082	544000000		60.502	476000000		58.1109	618000000
60.9195	544000000		60.5139	476000000		58.1222	618000000
60.9308	544000000		60.5258	476000000		58.1335	618000000
60.9421	544000000		60.5376	477000000		58.1448	618000000
60.9533	544000000		60.5495	477000000		58.1562	618000000
60.9646	544000000		60.5614	477000000		58.1675	618000000
60.9759	544000000		60.5732	477000000		58.1788	618000000
60.9872	544000000		60.5851	477000000		58.1901	618000000
60.9985	544000000		60.5969	477000000		58.2014	618000000
61.0097	544000000		60.6088	477000000		58.2127	618000000
61.021	544000000		60.6206	477000000		58.224	618000000
61.0323	544000000		60.6325	478000000		58.2353	618000000
61.0436	544000000		60.6443	478000000		58.2466	618000000
61.0548	544000000		60.6561	478000000		58.2579	618000000
61.0661	544000000		60.668	478000000		58.2692	619000000
61.0774	545000000		60.6798	478000000		58.2805	619000000
61.0887	545000000		60.6916	478000000		58.2918	619000000
61.0999	545000000		60.7034	478000000		58.3031	619000000
61.1112	545000000		60.7153	478000000		58.3143	619000000
61.1225	545000000		60.7271	479000000		58.3256	619000000
61.1337	545000000		60.7389	479000000		58.3369	619000000
61.145	545000000		60.7507	479000000		58.3482	619000000
61.1563	545000000		60.7625	479000000		58.3594	619000000
61.1675	545000000		60.7743	479000000		58.3707	619000000
61.1788	545000000		60.7861	479000000		58.382	619000000
61.1901	545000000		60.7979	479000000		58.3932	619000000
61.2013	545000000		60.8097	479000000		58.4045	619000000
61.2126	545000000		60.8214	480000000		58.4158	619000000
61.2239	545000000		60.8332	480000000		58.427	619000000
61.2351	545000000		60.845	480000000		58.4383	619000000
61.2464	545000000		60.8568	480000000		58.4495	619000000
61.2576	545000000		60.8686	480000000		58.4608	619000000
61.2689	545000000		60.8803	480000000		58.472	619000000
61.2802	545000000		60.8921	480000000		58.4833	620000000
61.2914	545000000		60.9039	480000000		58.4945	620000000
61.3027	545000000		60.9156	480000000		58.5057	620000000
61.3139	545000000		60.9274	481000000		58.517	620000000
61.3252	545000000		60.9391	481000000		58.5282	620000000
61.3365	545000000		60.9509	481000000		58.5395	620000000
61.3477	545000000		60.9627	481000000		58.5507	620000000
61.359	545000000		60.9744	481000000		58.5619	620000000
61.3702	545000000		60.9862	481000000		58.5731	620000000
61.3815	545000000		60.9979	481000000		58.5844	620000000
61.3927	545000000		61.0096	481000000		58.5956	620000000
61.404	545000000		61.0214	481000000		58.6068	620000000
61.4153	545000000		61.0331	482000000		58.618	620000000
61.4265	545000000		61.0448	482000000		58.6292	620000000
61.4378	545000000		61.0566	482000000		58.6404	620000000
61.449	545000000		61.0683	482000000		58.6516	620000000
61.4603	545000000		61.08	482000000		58.6628	620000000
61.4715	545000000		61.0917	482000000		58.6741	620000000
61.4828	545000000		61.1035	482000000		58.6853	620000000
61.4941	545000000		61.1152	482000000		58.6965	620000000
61.5053	545000000		61.1269	482000000		58.7077	620000000
61.5166	545000000		61.1386	482000000		58.7189	620000000
61.5278	545000000		61.1503	483000000		58.73	620000000
61.5391	545000000		61.162	483000000		58.7412	620000000
61.5503	545000000		61.1737	483000000		58.7524	620000000
61.5616	545000000		61.1855	483000000		58.7636	620000000
61.5728	545000000		61.1972	483000000		58.7748	620000000
61.5841	545000000		61.2088	483000000		58.786	620000000
61.5953	545000000		61.2206	483000000		58.7972	620000000
61.6066	545000000		61.2323	483000000		58.8083	620000000
61.6178	545000000		61.2439	483000000		58.8195	620000000
61.6291	545000000		61.2556	483000000		58.8307	620000000
61.6403	545000000		61.2673	483000000		58.8419	620000000
61.6516	545000000		61.279	484000000		58.853	620000000
61.6629	545000000		61.2907	484000000		58.8642	620000000
61.6741	545000000		61.3024	484000000		58.8754	620000000
61.6854	545000000		61.3141	484000000		58.8865	620000000
61.6966	545000000		61.3257	484000000		58.8977	620000000
61.7079	545000000		61.3374	484000000		58.9089	620000000
61.7191	545000000		61.3491	484000000		58.92	620000000
61.7304	545000000		61.3608	484000000		58.9312	620000000
61.7417	545000000		61.3725	484000000		58.9423	620000000
61.7529	544000000		61.3841	484000000		58.9535	620000000
61.7642	544000000		61.3958	484000000		58.9646	620000000
61.7754	544000000		61.4075	484000000		58.9758	620000000
61.7867	544000000		61.4191	485000000		58.9869	620000000
61.798	544000000		61.4308	485000000		58.9981	620000000
61.8092	544000000		61.4425	485000000		59.0092	620000000
61.8205	544000000		61.4541	485000000		59.0203	620000000
61.8317	544000000		61.4658	485000000		59.0315	620000000
61.843	544000000		61.4774	485000000		59.0426	620000000
61.8543	544000000		61.4891	485000000		59.0538	620000000
61.8655	544000000		61.5008	485000000		59.0649	620000000
61.8768	544000000		61.5124	485000000		59.076	620000000
61.888	544000000		61.5241	485000000		59.0871	620000000
61.8993	544000000		61.5357	485000000		59.0983	620000000
61.9106	544000000		61.5474	485000000		59.1094	620000000
61.9218	544000000		61.559	485000000		59.1205	620000000
61.9331	544000000		61.5707	485000000		59.1316	620000000
61.9444	544000000		61.5823	486000000		59.1427	620000000
61.9556	544000000		61.594	486000000		59.1539	620000000
61.9669	544000000		61.6056	486000000		59.165	620000000
61.9782	544000000		61.6173	486000000		59.1761	620000000
61.9895	544000000		61.6289	486000000		59.1872	620000000
62.0007	544000000		61.6405	486000000		59.1983	620000000
62.012	543000000		61.6522	486000000		59.2094	620000000
62.0233	543000000		61.6638	486000000		59.2205	620000000
62.0346	543000000		61.6755	486000000		59.2316	620000000
62.0458	543000000		61.6871	486000000		59.2428	620000000
62.0571	543000000		61.6987	486000000		59.2538	620000000
62.0684	543000000		61.7104	486000000		59.2649	620000000
62.0797	543000000		61.722	486000000		59.276	620000000
62.0909	543000000		61.7336	486000000		59.2871	620000000
62.1022	543000000		61.7453	486000000		59.2982	620000000
62.1135	543000000		61.7569	486000000		59.3093	620000000
62.1248	543000000		61.7685	487000000		59.3204	620000000
62.1361	543000000		61.7802	487000000		59.3315	620000000
62.1473	543000000		61.7918	487000000		59.3426	620000000
62.1586	543000000		61.8034	487000000		59.3537	619000000
62.1699	543000000		61.8151	487000000		59.3648	619000000
62.1812	543000000		61.8267	487000000		59.3759	619000000
62.1925	542000000		61.8383	487000000		59.3869	619000000
62.2038	542000000		61.8499	487000000		59.398	619000000
62.2151	542000000		61.8616	487000000		59.4091	619000000
62.2264	542000000		61.8732	487000000		59.4202	619000000
62.2377	542000000		61.8848	487000000		59.4313	619000000
62.249	542000000		61.8965	487000000		59.4423	619000000
62.2602	542000000		61.9081	487000000		59.4534	619000000
62.2715	542000000		61.9197	487000000		59.4645	619000000
62.2829	542000000		61.9313	487000000		59.4755	619000000
62.2942	542000000		61.943	487000000		59.4866	619000000
62.3055	542000000		61.9546	487000000		59.4977	619000000
62.3168	542000000		61.9662	487000000		59.5088	619000000
62.3281	542000000		61.9778	487000000		59.5198	619000000
62.3394	541000000		61.9895	487000000		59.5309	619000000
62.3507	541000000		62.0011	487000000		59.5419	619000000
62.362	541000000		62.0127	487000000		59.553	619000000
62.3733	541000000		62.0243	488000000		59.5641	619000000
62.3846	541000000		62.036	488000000		59.5751	619000000
62.3959	541000000		62.0476	488000000		59.5862	618000000
62.4072	541000000		62.0592	488000000		59.5972	618000000
62.4186	541000000		62.0708	488000000		59.6083	618000000
62.4299	541000000		62.0825	488000000		59.6193	618000000
62.4412	541000000		62.0941	488000000		59.6304	618000000
62.4525	541000000		62.1057	488000000		59.6414	618000000
62.4639	540000000		62.1173	488000000		59.6525	618000000
62.4752	540000000		62.1289	488000000		59.6636	618000000
62.4865	540000000		62.1406	488000000		59.6746	618000000
62.4978	540000000		62.1522	488000000		59.6856	618000000
62.5092	540000000		62.1638	488000000		59.6967	618000000
62.5205	540000000		62.1754	488000000		59.7077	618000000
62.5318	540000000		62.1871	488000000		59.7188	618000000
62.5432	540000000		62.1987	488000000		59.7298	618000000
62.5545	540000000		62.2103	488000000		59.7409	618000000
62.5659	540000000		62.2219	488000000		59.7519	617000000
62.5772	539000000		62.2336	488000000		59.7629	617000000
62.5885	539000000		62.2452	488000000		59.774	617000000
62.5999	539000000		62.2568	488000000		59.785	617000000
62.6112	539000000		62.2685	488000000		59.796	617000000
62.6226	539000000		62.2801	488000000		59.8071	617000000
62.6339	539000000		62.2917	488000000		59.8181	617000000
62.6453	539000000		62.3033	488000000		59.8291	617000000
62.6567	539000000		62.315	488000000		59.8402	617000000
62.668	539000000		62.3266	488000000		59.8512	617000000
62.6794	539000000		62.3382	488000000		59.8622	617000000
62.6908	538000000		62.3499	488000000		59.8733	617000000
62.7021	538000000		62.3615	488000000		59.8843	617000000
62.7135	538000000		62.3731	488000000		59.8953	616000000
62.7249	538000000		62.3848	488000000		59.9063	616000000
62.7362	538000000		62.3964	488000000		59.9174	616000000
62.7476	538000000		62.408	488000000		59.9284	616000000
62.759	538000000		62.4197	488000000		59.9394	616000000
62.7704	538000000		62.4313	488000000		59.9504	616000000
62.7818	537000000		62.443	488000000		59.9614	616000000
62.7931	537000000		62.4546	488000000		59.9725	616000000
62.8045	537000000		62.4662	488000000		59.9835	616000000
62.8159	537000000		62.4779	488000000		59.9945	616000000
62.8273	537000000		62.4895	488000000		60.0055	616000000
62.8387	537000000		62.5012	488000000		60.0165	615000000
62.8501	537000000		62.5128	488000000		60.0276	615000000
62.8615	537000000		62.5245	488000000		60.0386	615000000
62.8729	536000000		62.5361	488000000		60.0496	615000000
62.8843	536000000		62.5478	488000000		60.0606	615000000
62.8957	536000000		62.5594	488000000		60.0716	615000000
62.9071	536000000		62.571	488000000		60.0826	615000000
62.9185	536000000		62.5827	488000000		60.0936	615000000
62.9299	536000000		62.5943	488000000		60.1046	615000000
62.9414	536000000		62.606	488000000		60.1157	615000000
62.9528	536000000		62.6177	488000000		60.1267	615000000
62.9642	535000000		62.6293	488000000		60.1377	614000000
62.9756	535000000		62.641	488000000		60.1487	614000000
62.9871	535000000		62.6526	488000000		60.1597	614000000
62.9985	535000000		62.6643	488000000		60.1707	614000000
63.0099	535000000		62.676	488000000		60.1817	614000000
63.0214	535000000		62.6876	488000000		60.1927	614000000
63.0328	535000000		62.6993	488000000		60.2037	614000000
63.0442	534000000		62.711	488000000		60.2147	614000000
63.0557	534000000		62.7226	488000000		60.2257	614000000
63.0671	534000000		62.7343	488000000		60.2368	613000000
63.0786	534000000		62.746	488000000		60.2478	613000000
63.0901	534000000		62.7576	488000000		60.2587	613000000
63.1015	534000000		62.7693	488000000		60.2698	613000000
63.113	534000000		62.781	488000000		60.2808	613000000
63.1244	533000000		62.7927	488000000		60.2918	613000000
63.1359	533000000		62.8044	488000000		60.3028	613000000
63.1474	533000000		62.816	488000000		60.3138	613000000
63.1589	533000000		62.8277	488000000		60.3248	613000000
63.1703	533000000		62.8394	488000000		60.3358	612000000
63.1818	533000000		62.8511	488000000		60.3468	612000000
63.1933	533000000		62.8628	488000000		60.3578	612000000
63.2048	532000000		62.8745	488000000		60.3688	612000000
63.2163	532000000		62.8862	488000000		60.3798	612000000
63.2278	532000000		62.8979	488000000		60.3908	612000000
63.2392	532000000		62.9096	488000000		60.4018	612000000
63.2507	532000000		62.9213	488000000		60.4128	612000000
63.2623	532000000		62.933	488000000		60.4238	611000000
63.2738	531000000		62.9447	488000000		60.4348	611000000
63.2853	531000000		62.9564	488000000		60.4458	611000000
63.2968	531000000		62.9681	488000000		60.4568	611000000
63.3083	531000000		62.9798	488000000		60.4678	611000000
63.3198	531000000		62.9915	488000000		60.4788	611000000
63.3313	531000000		63.0032	488000000		60.4898	611000000
63.3429	531000000		63.0149	488000000		60.5008	611000000
63.3544	530000000		63.0267	488000000		60.5118	610000000
63.3659	530000000		63.0384	488000000		60.5228	610000000
63.3775	530000000		63.0501	488000000		60.5338	610000000
63.389	530000000		63.0618	488000000		60.5448	610000000
63.4005	530000000		63.0736	488000000		60.5558	610000000
63.4121	530000000		63.0853	488000000		60.5667	610000000
63.4236	529000000		63.097	488000000		60.5778	610000000
63.4352	529000000		63.1088	487000000		60.5887	610000000
63.4468	529000000		63.1205	487000000		60.5998	609000000
63.4583	529000000		63.1322	487000000		60.6107	609000000
63.4699	529000000		63.144	487000000		60.6217	609000000
63.4814	528000000		63.1557	487000000		60.6327	609000000
63.493	528000000		63.1675	487000000		60.6437	609000000
63.5046	528000000		63.1792	487000000		60.6547	609000000
63.5162	528000000		63.191	487000000		60.6657	609000000
63.5277	528000000		63.2027	487000000		60.6767	608000000
63.5393	528000000		63.2145	487000000		60.6877	608000000
63.5509	527000000		63.2263	487000000		60.6987	608000000
63.5625	527000000		63.238	487000000		60.7097	608000000
63.5741	527000000		63.2498	487000000		60.7207	608000000
63.5857	527000000		63.2616	487000000		60.7317	608000000
63.5973	527000000		63.2733	487000000		60.7427	608000000
63.609	527000000		63.2851	487000000		60.7537	607000000
63.6206	526000000		63.2969	487000000		60.7647	607000000
63.6322	526000000		63.3087	487000000		60.7757	607000000
63.6438	526000000		63.3205	487000000		60.7867	607000000
63.6554	526000000		63.3323	487000000		60.7977	607000000
63.6671	526000000		63.344	487000000		60.8087	607000000
63.6787	525000000		63.3558	487000000		60.8197	606000000
63.6903	525000000		63.3676	486000000		60.8307	606000000
63.702	525000000		63.3794	486000000		60.8417	606000000
63.7136	525000000		63.3912	486000000		60.8528	606000000
63.7253	525000000		63.403	486000000		60.8638	606000000
63.7369	524000000		63.4149	486000000		60.8748	606000000
63.7486	524000000		63.4267	486000000		60.8858	606000000
63.7603	524000000		63.4385	486000000		60.8968	605000000
63.7719	524000000		63.4503	486000000		60.9078	605000000
63.7836	524000000		63.4621	486000000		60.9188	605000000
63.7953	524000000		63.474	486000000		60.9298	605000000
63.807	523000000		63.4858	486000000		60.9408	605000000
63.8186	523000000		63.4976	486000000		60.9518	605000000
63.8303	523000000		63.5095	486000000		60.9628	604000000
63.842	523000000		63.5213	486000000		60.9738	604000000
63.8537	523000000		63.5331	486000000		60.9848	604000000
63.8654	522000000		63.545	486000000		60.9958	604000000
63.8771	522000000		63.5568	485000000		61.0069	604000000
63.8889	522000000		63.5687	485000000		61.0179	604000000
63.9006	522000000		63.5805	485000000		61.0289	603000000
63.9123	522000000		63.5924	485000000		61.0399	603000000
63.924	521000000		63.6043	485000000		61.0509	603000000
63.9357	521000000		63.6161	485000000		61.0619	603000000
63.9475	521000000		63.628	485000000		61.0729	603000000
63.9592	521000000		63.6399	485000000		61.084	603000000
63.971	520000000		63.6517	485000000		61.095	602000000
63.9827	520000000		63.6636	485000000		61.106	602000000
63.9945	520000000		63.6755	485000000		61.117	602000000
64.0062	520000000		63.6874	485000000		61.128	602000000
64.018	520000000		63.6993	485000000		61.139	602000000
64.0298	519000000		63.7112	485000000		61.1501	602000000
64.0415	519000000		63.7231	484000000		61.1611	601000000
64.0533	519000000		63.735	484000000		61.1721	601000000
64.0651	519000000		63.7469	484000000		61.1831	601000000
64.0769	519000000		63.7588	484000000		61.1942	601000000
64.0887	518000000		63.7707	484000000		61.2052	601000000
64.1005	518000000		63.7826	484000000		61.2162	601000000
64.1123	518000000		63.7946	484000000		61.2272	600000000
64.1241	518000000		63.8065	484000000		61.2383	600000000
64.1359	518000000		63.8184	484000000		61.2493	600000000
64.1477	517000000		63.8304	484000000		61.2603	600000000
64.1595	517000000		63.8423	484000000		61.2713	600000000
64.1714	517000000		63.8543	484000000		61.2824	599000000
64.1832	517000000		63.8662	483000000		61.2934	599000000
64.195	516000000		63.8782	483000000		61.3045	599000000
64.2069	516000000		63.8901	483000000		61.3155	599000000
64.2187	516000000		63.9021	483000000		61.3265	599000000
64.2306	516000000		63.914	483000000		61.3376	599000000
64.2424	516000000		63.926	483000000		61.3486	598000000
64.2543	515000000		63.938	483000000		61.3597	598000000
64.2661	515000000		63.95	483000000		61.3707	598000000
64.278	515000000		63.9619	483000000		61.3817	598000000
64.2899	515000000		63.9739	483000000		61.3928	598000000
64.3018	514000000		63.9859	483000000		61.4038	597000000
64.3137	514000000		63.9979	482000000		61.4149	597000000
64.3256	514000000		64.0099	482000000		61.4259	597000000
64.3375	514000000		64.0219	482000000		61.437	597000000
64.3494	513000000		64.0339	482000000		61.448	597000000
64.3613	513000000		64.0459	482000000		61.4591	596000000
64.3732	513000000		64.058	482000000		61.4701	596000000
64.3851	513000000		64.07	482000000		61.4812	596000000
64.397	513000000		64.082	482000000		61.4922	596000000
64.409	512000000		64.094	482000000		61.5033	596000000
64.4209	512000000		64.1061	482000000		61.5144	595000000
64.4328	512000000		64.1181	481000000		61.5254	595000000
64.4448	512000000		64.1302	481000000		61.5365	595000000
64.4567	511000000		64.1422	481000000		61.5475	595000000
64.4687	511000000		64.1543	481000000		61.5586	595000000
64.4807	511000000		64.1663	481000000		61.5697	594000000
64.4926	511000000		64.1784	481000000		61.5807	594000000
64.5046	510000000		64.1905	481000000		61.5918	594000000
64.5166	510000000		64.2025	481000000		61.6029	594000000
64.5286	510000000		64.2146	481000000		61.6139	594000000
64.5406	510000000		64.2267	481000000		61.625	593000000
64.5526	509000000		64.2388	480000000		61.6361	593000000
64.5646	509000000		64.2509	480000000		61.6472	593000000
64.5766	509000000		64.263	480000000		61.6583	593000000
64.5886	509000000		64.2751	480000000		61.6693	593000000
64.6006	508000000		64.2872	480000000		61.6804	592000000
64.6126	508000000		64.2993	480000000		61.6915	592000000
64.6247	508000000		64.3114	480000000		61.7026	592000000
64.6367	508000000		64.3235	480000000		61.7137	592000000
64.6488	507000000		64.3357	479000000		61.7248	592000000
64.6608	507000000		64.3478	479000000		61.7358	591000000
64.6729	507000000		64.3599	479000000		61.7469	591000000
64.6849	507000000		64.3721	479000000		61.758	591000000
64.697	506000000		64.3842	479000000		61.7691	591000000
64.7091	506000000		64.3964	479000000		61.7802	591000000
64.7211	506000000		64.4086	479000000		61.7913	590000000
64.7332	506000000		64.4207	479000000		61.8024	590000000
64.7453	505000000		64.4329	479000000		61.8135	590000000
64.7574	505000000		64.4451	478000000		61.8246	590000000
64.7695	505000000		64.4572	478000000		61.8357	589000000
64.7816	505000000		64.4694	478000000		61.8469	589000000
64.7938	504000000		64.4816	478000000		61.858	589000000
64.8059	504000000		64.4938	478000000		61.8691	589000000
64.818	504000000		64.506	478000000		61.8802	589000000
64.8301	504000000		64.5182	478000000		61.8913	588000000
64.8423	503000000		64.5304	478000000		61.9024	588000000
64.8544	503000000		64.5427	477000000		61.9136	588000000
64.8666	503000000		64.5549	477000000		61.9247	588000000
64.8787	503000000		64.5671	477000000		61.9358	587000000
64.8909	502000000		64.5794	477000000		61.9469	587000000
64.9031	502000000		64.5916	477000000		61.9581	587000000
64.9152	502000000		64.6038	477000000		61.9692	587000000
64.9274	502000000		64.6161	477000000		61.9803	587000000
64.9396	501000000		64.6283	476000000		61.9915	586000000
64.9518	501000000		64.6406	476000000		62.0026	586000000
64.964	501000000		64.6529	476000000		62.0137	586000000
64.9762	501000000		64.6651	476000000		62.0249	586000000
64.9884	500000000		64.6774	476000000		62.036	585000000
65.0007	500000000		64.6897	476000000		62.0472	585000000
65.0129	500000000		64.702	476000000		62.0583	585000000
65.0251	499000000		64.7143	475000000		62.0695	585000000
65.0374	499000000		64.7266	475000000		62.0806	585000000
65.0496	499000000		64.7389	475000000		62.0918	584000000
65.0619	499000000		64.7512	475000000		62.1029	584000000
65.0741	498000000		64.7636	475000000		62.1141	584000000
65.0864	498000000		64.7759	475000000		62.1253	584000000
65.0987	498000000		64.7882	475000000		62.1364	583000000
65.111	498000000		64.8006	474000000		62.1476	583000000
65.1232	497000000		64.8129	474000000		62.1588	583000000
65.1355	497000000		64.8252	474000000		62.1699	583000000
65.1479	497000000		64.8376	474000000		62.1811	582000000
65.1602	496000000		64.85	474000000		62.1923	582000000
65.1725	496000000		64.8623	474000000		62.2035	582000000
65.1848	496000000		64.8747	474000000		62.2146	582000000
65.1971	496000000		64.8871	473000000		62.2258	582000000
65.2095	495000000		64.8995	473000000		62.237	581000000
65.2218	495000000		64.9119	473000000		62.2482	581000000
65.2341	495000000		64.9243	473000000		62.2594	581000000
65.2465	494000000		64.9367	473000000		62.2706	581000000
65.2589	494000000		64.9491	473000000		62.2818	580000000
65.2712	494000000		64.9615	473000000		62.293	580000000
65.2836	494000000		64.974	472000000		62.3042	580000000
65.296	493000000		64.9864	472000000		62.3154	580000000
65.3084	493000000		64.9988	472000000		62.3266	579000000
65.3208	493000000		65.0113	472000000		62.3378	579000000
65.3332	493000000		65.0237	472000000		62.349	579000000
65.3456	492000000		65.0362	472000000		62.3603	579000000
65.358	492000000		65.0486	471000000		62.3715	578000000
65.3704	492000000		65.0611	471000000		62.3827	578000000
65.3829	491000000		65.0736	471000000		62.3939	578000000
65.3953	491000000		65.0861	471000000		62.4052	578000000
65.4078	491000000		65.0986	471000000		62.4164	577000000
65.4202	491000000		65.1111	471000000		62.4276	577000000
65.4327	490000000		65.1235	470000000		62.4389	577000000
65.4451	490000000		65.1361	470000000		62.4501	577000000
65.4576	490000000		65.1486	470000000		62.4613	576000000
65.4701	489000000		65.1611	470000000		62.4726	576000000
65.4826	489000000		65.1736	470000000		62.4838	576000000
65.4951	489000000		65.1862	470000000		62.4951	576000000
65.5076	488000000		65.1987	469000000		62.5063	575000000
65.5201	488000000		65.2113	469000000		62.5176	575000000
65.5326	488000000		65.2238	469000000		62.5288	575000000
65.5452	488000000		65.2364	469000000		62.5401	575000000
65.5577	487000000		65.2489	469000000		62.5514	574000000
65.5702	487000000		65.2615	469000000		62.5626	574000000
65.5828	487000000		65.2741	468000000		62.5739	574000000
65.5953	486000000		65.2867	468000000		62.5852	574000000
65.6079	486000000		65.2993	468000000		62.5965	573000000
65.6205	486000000		65.3119	468000000		62.6078	573000000
65.633	486000000		65.3245	468000000		62.619	573000000
65.6456	485000000		65.3371	468000000		62.6303	573000000
65.6582	485000000		65.3498	467000000		62.6416	572000000
65.6708	485000000		65.3624	467000000		62.6529	572000000
65.6834	484000000		65.375	467000000		62.6642	572000000
65.696	484000000		65.3877	467000000		62.6755	572000000
65.7087	484000000		65.4003	467000000		62.6868	571000000
65.7213	483000000		65.413	466000000		62.6981	571000000
65.7339	483000000		65.4256	466000000		62.7094	571000000
65.7466	483000000		65.4383	466000000		62.7207	570000000
65.7592	482000000		65.451	466000000		62.7321	570000000
65.7719	482000000		65.4637	466000000		62.7434	570000000
65.7846	482000000		65.4764	466000000		62.7547	570000000
65.7972	482000000		65.4891	465000000		62.766	569000000
65.8099	481000000		65.5018	465000000		62.7774	569000000
65.8226	481000000		65.5145	465000000		62.7887	569000000
65.8353	481000000		65.5272	465000000		62.8	569000000
65.848	480000000		65.54	465000000		62.8114	568000000
65.8607	480000000		65.5527	464000000		62.8227	568000000
65.8735	480000000		65.5654	464000000		62.8341	568000000
65.8862	479000000		65.5782	464000000		62.8454	568000000
65.8989	479000000		65.591	464000000		62.8568	567000000
65.9117	479000000		65.6037	464000000		62.8681	567000000
65.9244	478000000		65.6165	463000000		62.8795	567000000
65.9372	478000000		65.6293	463000000		62.8909	566000000
65.95	478000000		65.6421	463000000		62.9022	566000000
65.9627	478000000		65.6549	463000000		62.9136	566000000
65.9755	477000000		65.6677	463000000		62.925	566000000
65.9883	477000000		65.6805	463000000		62.9363	565000000
66.0011	477000000		65.6933	462000000		62.9477	565000000
66.0139	476000000		65.7061	462000000		62.9591	565000000
66.0268	476000000		65.719	462000000		62.9705	565000000
66.0396	476000000		65.7318	462000000		62.9819	564000000
66.0524	475000000		65.7447	462000000		62.9933	564000000
66.0653	475000000		65.7575	461000000		63.0047	564000000
66.0781	475000000		65.7704	461000000		63.0161	563000000
66.091	474000000		65.7833	461000000		63.0275	563000000
66.1038	474000000		65.7961	461000000		63.0389	563000000
66.1167	474000000		65.809	461000000		63.0503	563000000
66.1296	473000000		65.8219	460000000		63.0618	562000000
66.1425	473000000		65.8348	460000000		63.0732	562000000
66.1554	473000000		65.8478	460000000		63.0846	562000000
66.1683	472000000		65.8607	460000000		63.096	562000000
66.1812	472000000		65.8736	460000000		63.1075	561000000
66.1941	472000000		65.8865	459000000		63.1189	561000000
66.2071	472000000		65.8995	459000000		63.1303	561000000
66.22	471000000		65.9124	459000000		63.1418	560000000
66.233	471000000		65.9254	459000000		63.1532	560000000
66.2459	471000000		65.9384	458000000		63.1647	560000000
66.2589	470000000		65.9513	458000000		63.1762	560000000
66.2719	470000000		65.9643	458000000		63.1876	559000000
66.2849	470000000		65.9773	458000000		63.1991	559000000
66.2978	469000000		65.9903	458000000		63.2106	559000000
66.3109	469000000		66.0033	457000000		63.222	558000000
66.3239	469000000		66.0163	457000000		63.2335	558000000
66.3369	468000000		66.0294	457000000		63.245	558000000
66.3499	468000000		66.0424	457000000		63.2565	558000000
66.3629	468000000		66.0554	457000000		63.268	557000000
66.376	467000000		66.0685	456000000		63.2795	557000000
66.389	467000000		66.0815	456000000		63.291	557000000
66.4021	467000000		66.0946	456000000		63.3025	556000000
66.4152	466000000		66.1077	456000000		63.314	556000000
66.4282	466000000		66.1208	455000000		63.3255	556000000
66.4413	466000000		66.1338	455000000		63.337	556000000
66.4544	465000000		66.1469	455000000		63.3485	555000000
66.4675	465000000		66.16	455000000		63.3601	555000000
66.4806	465000000		66.1732	455000000		63.3716	555000000
66.4938	464000000		66.1863	454000000		63.3831	554000000
66.5069	464000000		66.1994	454000000		63.3946	554000000
66.52	464000000		66.2125	454000000		63.4062	554000000
66.5332	463000000		66.2257	454000000		63.4177	553000000
66.5463	463000000		66.2388	453000000		63.4293	553000000
66.5595	463000000		66.252	453000000		63.4408	553000000
66.5727	462000000		66.2652	453000000		63.4524	553000000
66.5858	462000000		66.2784	453000000		63.464	552000000
66.599	462000000		66.2915	453000000		63.4755	552000000
66.6122	461000000		66.3047	452000000		63.4871	552000000
66.6255	461000000		66.3179	452000000		63.4987	551000000
66.6387	461000000		66.3312	452000000		63.5103	551000000
66.6519	460000000		66.3444	452000000		63.5219	551000000
66.6651	460000000		66.3576	451000000		63.5334	551000000
66.6784	460000000		66.3709	451000000		63.545	550000000
66.6916	459000000		66.3841	451000000		63.5566	550000000
66.7049	459000000		66.3974	451000000		63.5682	550000000
66.7182	459000000		66.4106	451000000		63.5798	549000000
66.7314	458000000		66.4239	450000000		63.5915	549000000
66.7447	458000000		66.4372	450000000		63.6031	549000000
66.758	458000000		66.4505	450000000		63.6147	548000000
66.7713	457000000		66.4638	450000000		63.6263	548000000
66.7846	457000000		66.4771	449000000		63.6379	548000000
66.798	457000000		66.4904	449000000		63.6496	548000000
66.8113	456000000		66.5037	449000000		63.6612	547000000
66.8247	456000000		66.5171	449000000		63.6729	547000000
66.838	456000000		66.5304	448000000		63.6845	547000000
66.8514	455000000		66.5438	448000000		63.6962	546000000
66.8647	455000000		66.5571	448000000		63.7078	546000000
66.8781	454000000		66.5705	448000000		63.7195	546000000
66.8915	454000000		66.5839	447000000		63.7312	545000000
66.9049	454000000		66.5973	447000000		63.7428	545000000
66.9183	453000000		66.6107	447000000		63.7545	545000000
66.9317	453000000		66.624	447000000		63.7662	544000000
66.9452	453000000		66.6375	446000000		63.7779	544000000
66.9586	452000000		66.6509	446000000		63.7896	544000000
66.972	452000000		66.6643	446000000		63.8013	544000000
66.9855	452000000		66.6778	446000000		63.813	543000000
66.999	451000000		66.6912	445000000		63.8247	543000000
67.0124	451000000		66.7047	445000000		63.8364	543000000
67.0259	451000000		66.7181	445000000		63.8481	542000000
67.0394	450000000		66.7316	445000000		63.8598	542000000
67.0529	450000000		66.7451	445000000		63.8716	542000000
67.0664	450000000		66.7586	444000000		63.8833	541000000
67.0799	449000000		66.7721	444000000		63.895	541000000
67.0935	449000000		66.7856	444000000		63.9068	541000000
67.107	449000000		66.7991	444000000		63.9185	540000000
67.1206	448000000		66.8127	443000000		63.9303	540000000
67.1341	448000000		66.8262	443000000		63.942	540000000
67.1477	447000000		66.8398	443000000		63.9538	539000000
67.1613	447000000		66.8533	442000000		63.9656	539000000
67.1749	447000000		66.8669	442000000		63.9773	539000000
67.1885	446000000		66.8805	442000000		63.9891	539000000
67.2021	446000000		66.8941	442000000		64.0009	538000000
67.2157	446000000		66.9077	441000000		64.0127	538000000
67.2293	445000000		66.9213	441000000		64.0245	538000000
67.2429	445000000		66.9349	441000000		64.0363	537000000
67.2566	445000000		66.9485	441000000		64.0481	537000000
67.2702	444000000		66.9621	440000000		64.0599	537000000
67.2839	444000000		66.9758	440000000		64.0717	536000000
67.2976	444000000		66.9894	440000000		64.0835	536000000
67.3113	443000000		67.0031	440000000		64.0953	536000000
67.325	443000000		67.0168	439000000		64.1072	535000000
67.3387	442000000		67.0305	439000000		64.119	535000000
67.3524	442000000		67.0442	439000000		64.1308	535000000
67.3661	442000000		67.0579	439000000		64.1427	534000000
67.3798	441000000		67.0716	438000000		64.1546	534000000
67.3936	441000000		67.0853	438000000		64.1664	534000000
67.4073	441000000		67.099	438000000		64.1783	533000000
67.4211	440000000		67.1128	438000000		64.1901	533000000
67.4348	440000000		67.1265	437000000		64.202	533000000
67.4486	440000000		67.1402	437000000		64.2139	532000000
67.4624	439000000		67.154	437000000		64.2258	532000000
67.4762	439000000		67.1678	437000000		64.2377	532000000
67.49	439000000		67.1816	436000000		64.2495	531000000
67.5038	438000000		67.1954	436000000		64.2614	531000000
67.5177	438000000		67.2092	436000000		64.2734	531000000
67.5315	437000000		67.223	435000000		64.2853	531000000
67.5454	437000000		67.2368	435000000		64.2972	530000000
67.5592	437000000		67.2507	435000000		64.3091	530000000
67.5731	436000000		67.2645	435000000		64.321	530000000
67.587	436000000		67.2784	434000000		64.333	529000000
67.6009	436000000		67.2922	434000000		64.3449	529000000
67.6148	435000000		67.3061	434000000		64.3568	529000000
67.6287	435000000		67.32	434000000		64.3688	528000000
67.6426	435000000		67.3339	433000000		64.3808	528000000
67.6565	434000000		67.3478	433000000		64.3927	528000000
67.6705	434000000		67.3617	433000000		64.4047	527000000
67.6844	433000000		67.3756	432000000		64.4167	527000000
67.6984	433000000		67.3895	432000000		64.4286	527000000
67.7124	433000000		67.4035	432000000		64.4406	526000000
67.7263	432000000		67.4174	432000000		64.4526	526000000
67.7403	432000000		67.4314	431000000		64.4646	526000000
67.7543	432000000		67.4454	431000000		64.4766	525000000
67.7684	431000000		67.4594	431000000		64.4886	525000000
67.7824	431000000		67.4733	431000000		64.5006	525000000
67.7964	430000000		67.4874	430000000		64.5126	524000000
67.8105	430000000		67.5014	430000000		64.5247	524000000
67.8245	430000000		67.5154	430000000		64.5367	524000000
67.8386	429000000		67.5294	429000000		64.5487	523000000
67.8526	429000000		67.5435	429000000		64.5608	523000000
67.8667	429000000		67.5575	429000000		64.5728	523000000
67.8808	428000000		67.5716	429000000		64.5849	522000000
67.8949	428000000		67.5857	428000000		64.5969	522000000
67.909	428000000		67.5997	428000000		64.609	522000000
67.9232	427000000		67.6138	428000000		64.6211	521000000
67.9373	427000000		67.6279	427000000		64.6332	521000000
67.9514	426000000		67.642	427000000		64.6452	521000000
67.9656	426000000		67.6562	427000000		64.6573	520000000
67.9798	426000000		67.6703	427000000		64.6694	520000000
67.994	425000000		67.6844	426000000		64.6815	520000000
68.0081	425000000		67.6986	426000000		64.6936	519000000
68.0223	425000000		67.7128	426000000		64.7057	519000000
68.0366	424000000		67.7269	425000000		64.7179	519000000
68.0508	424000000		67.7411	425000000		64.73	518000000
68.065	423000000		67.7553	425000000		64.7421	518000000
68.0792	423000000		67.7695	425000000		64.7543	518000000
68.0935	423000000		67.7837	424000000		64.7664	517000000
68.1077	422000000		67.798	424000000		64.7785	517000000
68.122	422000000		67.8122	424000000		64.7907	516000000
68.1363	422000000		67.8264	423000000		64.8029	516000000
68.1506	421000000		67.8407	423000000		64.815	516000000
68.1649	421000000		67.855	423000000		64.8272	515000000
68.1792	420000000		67.8692	422000000		64.8394	515000000
68.1936	420000000		67.8835	422000000		64.8516	515000000
68.2079	420000000		67.8978	422000000		64.8638	514000000
68.2222	419000000		67.9121	422000000		64.876	514000000
68.2366	419000000		67.9265	421000000		64.8882	514000000
68.251	419000000		67.9408	421000000		64.9004	513000000
68.2653	418000000		67.9551	421000000		64.9126	513000000
68.2797	418000000		67.9695	420000000		64.9248	513000000
68.2941	417000000		67.9838	420000000		64.9371	512000000
68.3085	417000000		67.9982	420000000		64.9493	512000000
68.323	417000000		68.0126	420000000		64.9616	512000000
68.3374	416000000		68.027	419000000		64.9738	511000000
68.3518	416000000		68.0414	419000000		64.9861	511000000
68.3663	415000000		68.0558	419000000		64.9983	511000000
68.3807	415000000		68.0702	418000000		65.0106	510000000
68.3952	415000000		68.0847	418000000		65.0229	510000000
68.4097	414000000		68.0991	418000000		65.0351	510000000
68.4242	414000000		68.1136	417000000		65.0474	509000000
68.4387	414000000		68.128	417000000		65.0597	509000000
68.4532	413000000		68.1425	417000000		65.072	509000000
68.4678	413000000		68.157	417000000		65.0843	508000000
68.4823	412000000		68.1715	416000000		65.0966	508000000
68.4968	412000000		68.186	416000000		65.109	507000000
68.5114	412000000		68.2005	416000000		65.1213	507000000
68.526	411000000		68.2151	415000000		65.1336	507000000
68.5406	411000000		68.2296	415000000		65.146	506000000
68.5552	411000000		68.2442	415000000		65.1583	506000000
68.5698	410000000		68.2587	414000000		65.1707	506000000
68.5844	410000000		68.2733	414000000		65.183	505000000
68.599	409000000		68.2879	414000000		65.1954	505000000
68.6137	409000000		68.3025	413000000		65.2078	505000000
68.6283	409000000		68.3171	413000000		65.2202	504000000
68.643	408000000		68.3317	413000000		65.2326	504000000
68.6576	408000000		68.3463	413000000		65.2449	504000000
68.6723	407000000		68.361	412000000		65.2573	503000000
68.687	407000000		68.3756	412000000		65.2698	503000000
68.7017	407000000		68.3903	412000000		65.2822	503000000
68.7164	406000000		68.405	411000000		65.2946	502000000
68.7312	406000000		68.4196	411000000		65.307	502000000
68.7459	406000000		68.4343	411000000		65.3195	501000000
68.7606	405000000		68.449	410000000		65.3319	501000000
68.7754	405000000		68.4638	410000000		65.3443	501000000
68.7902	404000000		68.4785	410000000		65.3568	500000000
68.805	404000000		68.4932	409000000		65.3692	500000000
68.8197	404000000		68.508	409000000		65.3817	500000000
68.8346	403000000		68.5227	409000000		65.3942	499000000
68.8494	403000000		68.5375	408000000		65.4067	499000000
68.8642	402000000		68.5523	408000000		65.4192	499000000
68.879	402000000		68.5671	408000000		65.4317	498000000
68.8939	402000000		68.5819	408000000		65.4442	498000000
68.9087	401000000		68.5967	407000000		65.4567	498000000
68.9236	401000000		68.6115	407000000		65.4692	497000000
68.9385	400000000		68.6264	407000000		65.4817	497000000
68.9534	400000000		68.6412	406000000		65.4942	496000000
68.9683	400000000		68.6561	406000000		65.5068	496000000
68.9832	399000000		68.671	406000000		65.5193	496000000
68.9981	399000000		68.6858	405000000		65.5319	495000000
69.0131	399000000		68.7007	405000000		65.5444	495000000
69.028	398000000		68.7156	405000000		65.557	495000000
69.043	398000000		68.7305	404000000		65.5696	494000000
69.058	397000000		68.7455	404000000		65.5821	494000000
69.073	397000000		68.7604	404000000		65.5947	494000000
69.088	397000000		68.7754	403000000		65.6073	493000000
69.103	396000000		68.7903	403000000		65.6199	493000000
69.118	396000000		68.8053	403000000		65.6325	493000000
69.133	395000000		68.8203	402000000		65.6452	492000000
69.1481	395000000		68.8353	402000000		65.6578	492000000
69.1631	395000000		68.8503	402000000		65.6704	491000000
69.1782	394000000		68.8653	401000000		65.683	491000000
69.1933	394000000		68.8803	401000000		65.6957	491000000
69.2083	393000000		68.8954	401000000		65.7083	490000000
69.2234	393000000		68.9104	400000000		65.721	490000000
69.2386	393000000		68.9255	400000000		65.7336	490000000
69.2537	392000000		68.9406	400000000		65.7463	489000000
69.2688	392000000		68.9556	399000000		65.759	489000000
69.284	391000000		68.9707	399000000		65.7717	489000000
69.2991	391000000		68.9858	399000000		65.7844	488000000
69.3143	391000000		69.001	398000000		65.7971	488000000
69.3294	390000000		69.0161	398000000		65.8098	487000000
69.3447	390000000		69.0312	398000000		65.8225	487000000
69.3598	390000000		69.0464	397000000		65.8352	487000000
69.3751	389000000		69.0616	397000000		65.8479	486000000
69.3903	389000000		69.0767	397000000		65.8607	486000000
69.4055	388000000		69.0919	396000000		65.8734	486000000
69.4208	388000000		69.1071	396000000		65.8862	485000000
69.436	388000000		69.1223	396000000		65.8989	485000000
69.4513	387000000		69.1376	395000000		65.9117	484000000
69.4666	387000000		69.1528	395000000		65.9245	484000000
69.4819	386000000		69.168	395000000		65.9373	484000000
69.4972	386000000		69.1833	394000000		65.9501	483000000
69.5125	386000000		69.1986	394000000		65.9629	483000000
69.5278	385000000		69.2138	394000000		65.9757	483000000
69.5432	385000000		69.2291	393000000		65.9885	482000000
69.5585	384000000		69.2444	393000000		66.0013	482000000
69.5739	384000000		69.2598	393000000		66.0141	482000000
69.5893	384000000		69.2751	392000000		66.0269	481000000
69.6047	383000000		69.2904	392000000		66.0398	481000000
69.6201	383000000		69.3058	392000000		66.0526	480000000
69.6355	382000000		69.3211	391000000		66.0655	480000000
69.6509	382000000		69.3365	391000000		66.0784	480000000
69.6663	382000000		69.3519	391000000		66.0912	479000000
69.6818	381000000		69.3673	390000000		66.1041	479000000
69.6972	381000000		69.3827	390000000		66.117	479000000
69.7127	380000000		69.3981	390000000		66.1299	478000000
69.7282	380000000		69.4136	389000000		66.1428	478000000
69.7437	380000000		69.429	389000000		66.1557	477000000
69.7592	379000000		69.4445	389000000		66.1686	477000000
69.7747	379000000		69.4599	388000000		66.1815	477000000
69.7903	378000000		69.4754	388000000		66.1945	476000000
69.8058	378000000		69.4909	388000000		66.2074	476000000
69.8213	378000000		69.5064	387000000		66.2203	476000000
69.8369	377000000		69.5219	387000000		66.2333	475000000
69.8525	377000000		69.5374	387000000		66.2463	475000000
69.8681	376000000		69.553	386000000		66.2592	474000000
69.8837	376000000		69.5685	386000000		66.2722	474000000
69.8993	376000000		69.5841	386000000		66.2852	474000000
69.9149	375000000		69.5997	385000000		66.2982	473000000
69.9305	375000000		69.6153	385000000		66.3112	473000000
69.9462	375000000		69.6308	385000000		66.3242	473000000
69.9618	374000000		69.6465	384000000		66.3372	472000000
69.9775	374000000		69.6621	384000000		66.3502	472000000
69.9932	373000000		69.6777	384000000		66.3633	471000000
70.0089	373000000		69.6934	383000000		66.3763	471000000
70.0246	373000000		69.709	383000000		66.3893	471000000
70.0403	372000000		69.7247	383000000		66.4024	470000000
70.0561	372000000		69.7404	382000000		66.4155	470000000
70.0718	371000000		69.7561	382000000		66.4285	470000000
70.0876	371000000		69.7718	382000000		66.4416	469000000
70.1033	371000000		69.7875	381000000		66.4547	469000000
70.1191	370000000		69.8032	381000000		66.4678	468000000
70.1349	370000000		69.819	380000000		66.4809	468000000
70.1507	369000000		69.8347	380000000		66.494	468000000
70.1665	369000000		69.8505	380000000		66.5071	467000000
70.1823	369000000		69.8662	379000000		66.5202	467000000
70.1982	368000000		69.882	379000000		66.5334	467000000
70.214	368000000		69.8978	379000000		66.5465	466000000
70.2299	367000000		69.9136	378000000		66.5597	466000000
70.2458	367000000		69.9295	378000000		66.5728	465000000
70.2617	367000000		69.9453	378000000		66.586	465000000
70.2776	366000000		69.9612	377000000		66.5992	465000000
70.2935	366000000		69.977	377000000		66.6123	464000000
70.3094	365000000		69.9929	377000000		66.6255	464000000
70.3253	365000000		70.0088	376000000		66.6387	463000000
70.3413	365000000		70.0247	376000000		66.6519	463000000
70.3572	364000000		70.0406	376000000		66.6651	463000000
70.3732	364000000		70.0565	375000000		66.6784	462000000
70.3892	363000000		70.0724	375000000		66.6916	462000000
70.4052	363000000		70.0884	375000000		66.7048	462000000
70.4212	363000000		70.1043	374000000		66.7181	461000000
70.4372	362000000		70.1203	374000000		66.7313	461000000
70.4533	362000000		70.1363	373000000		66.7446	460000000
70.4693	361000000		70.1523	373000000		66.7579	460000000
70.4854	361000000		70.1683	373000000		66.7711	460000000
70.5014	361000000		70.1843	372000000		66.7844	459000000
70.5175	360000000		70.2004	372000000		66.7977	459000000
70.5336	360000000		70.2164	372000000		66.811	459000000
70.5497	359000000		70.2324	371000000		66.8243	458000000
70.5658	359000000		70.2485	371000000		66.8376	458000000
70.582	359000000		70.2646	371000000		66.851	457000000
70.5981	358000000		70.2807	370000000		66.8643	457000000
70.6142	358000000		70.2968	370000000		66.8776	457000000
70.6304	357000000		70.3129	370000000		66.891	456000000
70.6466	357000000		70.329	369000000		66.9043	456000000
70.6628	357000000		70.3452	369000000		66.9177	455000000
70.679	356000000		70.3613	368000000		66.9311	455000000
70.6952	356000000		70.3775	368000000		66.9445	455000000
70.7114	355000000		70.3937	368000000		66.9579	454000000
70.7277	355000000		70.4099	367000000		66.9713	454000000
70.7439	355000000		70.4261	367000000		66.9847	454000000
70.7602	354000000		70.4423	367000000		66.9981	453000000
70.7765	354000000		70.4585	366000000		67.0115	453000000
70.7928	353000000		70.4748	366000000		67.025	452000000
70.8091	353000000		70.491	366000000		67.0384	452000000
70.8254	353000000		70.5073	365000000		67.0518	452000000
70.8417	352000000		70.5235	365000000		67.0653	451000000
70.858	352000000		70.5398	365000000		67.0788	451000000
70.8744	351000000		70.5561	364000000		67.0922	450000000
70.8907	351000000		70.5725	364000000		67.1057	450000000
70.9071	351000000		70.5888	363000000		67.1192	450000000
70.9235	350000000		70.6051	363000000		67.1327	449000000
70.9399	350000000		70.6215	363000000		67.1462	449000000
70.9563	349000000		70.6378	362000000		67.1597	448000000
70.9728	349000000		70.6542	362000000		67.1732	448000000
70.9892	349000000		70.6706	362000000		67.1868	448000000
71.0056	348000000		70.687	361000000		67.2003	447000000
71.0221	348000000		70.7034	361000000		67.2139	447000000
71.0386	347000000		70.7198	361000000		67.2274	447000000
71.0551	347000000		70.7363	360000000		67.241	446000000
71.0716	347000000		70.7527	360000000		67.2546	446000000
71.0881	346000000		70.7692	359000000		67.2682	445000000
71.1046	346000000		70.7857	359000000		67.2818	445000000
71.1211	345000000		70.8021	359000000		67.2953	445000000
71.1377	345000000		70.8187	358000000		67.309	444000000
71.1542	345000000		70.8352	358000000		67.3226	444000000
71.1708	344000000		70.8517	358000000		67.3362	443000000
71.1874	344000000		70.8682	357000000		67.3498	443000000
71.204	343000000		70.8848	357000000		67.3635	443000000
71.2206	343000000		70.9013	356000000		67.3771	442000000
71.2372	343000000		70.9179	356000000		67.3908	442000000
71.2538	342000000		70.9345	356000000		67.4044	441000000
71.2705	342000000		70.9511	355000000		67.4181	441000000
71.2872	341000000		70.9677	355000000		67.4318	441000000
71.3038	341000000		70.9843	355000000		67.4455	440000000
71.3205	341000000		71.001	354000000		67.4592	440000000
71.3372	340000000		71.0176	354000000		67.4729	440000000
71.3539	340000000		71.0343	354000000		67.4866	439000000
71.3706	339000000		71.051	353000000		67.5004	439000000
71.3874	339000000		71.0677	353000000		67.5141	438000000
71.4041	339000000		71.0844	352000000		67.5278	438000000
71.4209	338000000		71.1011	352000000		67.5416	438000000
71.4377	338000000		71.1178	352000000		67.5554	437000000
71.4544	337000000		71.1345	351000000		67.5691	437000000
71.4712	337000000		71.1513	351000000		67.5829	436000000
71.4881	337000000		71.168	351000000		67.5967	436000000
71.5049	336000000		71.1848	350000000		67.6105	436000000
71.5217	336000000		71.2016	350000000		67.6243	435000000
71.5386	335000000		71.2184	349000000		67.6381	435000000
71.5554	335000000		71.2352	349000000		67.6519	434000000
71.5723	335000000		71.2521	349000000		67.6658	434000000
71.5892	334000000		71.2689	348000000		67.6796	434000000
71.6061	334000000		71.2858	348000000		67.6934	433000000
71.623	333000000		71.3026	348000000		67.7073	433000000
71.6399	333000000		71.3195	347000000		67.7212	432000000
71.6568	333000000		71.3364	347000000		67.7351	432000000
71.6738	332000000		71.3533	347000000		67.7489	432000000
71.6907	332000000		71.3702	346000000		67.7628	431000000
71.7077	331000000		71.3871	346000000		67.7767	431000000
71.7247	331000000		71.4041	345000000		67.7906	431000000
71.7417	331000000		71.421	345000000		67.8046	430000000
71.7587	330000000		71.438	345000000		67.8185	430000000
71.7757	330000000		71.455	344000000		67.8324	429000000
71.7927	329000000		71.472	344000000		67.8464	429000000
71.8098	329000000		71.489	344000000		67.8603	429000000
71.8268	329000000		71.506	343000000		67.8743	428000000
71.8439	328000000		71.523	343000000		67.8882	428000000
71.861	328000000		71.5401	342000000		67.9022	427000000
71.8781	327000000		71.5571	342000000		67.9162	427000000
71.8952	327000000		71.5742	342000000		67.9302	427000000
71.9123	327000000		71.5913	341000000		67.9442	426000000
71.9295	326000000		71.6084	341000000		67.9582	426000000
71.9466	326000000		71.6255	341000000		67.9723	425000000
71.9638	325000000		71.6426	340000000		67.9863	425000000
71.981	325000000		71.6597	340000000		68.0003	425000000
71.9981	325000000		71.6769	339000000		68.0144	424000000
72.0153	324000000		71.694	339000000		68.0284	424000000
72.0325	324000000		71.7112	339000000		68.0425	423000000
72.0498	323000000		71.7284	338000000		68.0566	423000000
72.067	323000000		71.7456	338000000		68.0707	423000000
72.0842	323000000		71.7628	338000000		68.0847	422000000
72.1015	322000000		71.78	337000000		68.0989	422000000
72.1188	322000000		71.7973	337000000		68.113	421000000
72.1361	321000000		71.8145	336000000		68.1271	421000000
72.1534	321000000		71.8318	336000000		68.1412	421000000
72.1707	321000000		71.849	336000000		68.1554	420000000
72.188	320000000		71.8663	335000000		68.1695	420000000
72.2053	320000000		71.8836	335000000		68.1837	419000000
72.2227	319000000		71.9009	335000000		68.1978	419000000
72.24	319000000		71.9183	334000000		68.212	419000000
72.2574	319000000		71.9356	334000000		68.2262	418000000
72.2748	318000000		71.9529	333000000		68.2404	418000000
72.2922	318000000		71.9703	333000000		68.2546	417000000
72.3096	317000000		71.9877	333000000		68.2688	417000000
72.327	317000000		72.0051	332000000		68.283	417000000
72.3445	317000000		72.0225	332000000		68.2972	416000000
72.3619	316000000		72.0399	332000000		68.3115	416000000
72.3794	316000000		72.0573	331000000		68.3257	415000000
72.3969	315000000		72.0748	331000000		68.34	415000000
72.4143	315000000		72.0922	330000000		68.3542	415000000
72.4318	315000000		72.1097	330000000		68.3685	414000000
72.4493	314000000		72.1272	330000000		68.3828	414000000
72.4669	314000000		72.1446	329000000		68.3971	414000000
72.4844	313000000		72.1621	329000000		68.4114	413000000
72.502	313000000		72.1797	328000000		68.4257	413000000
72.5195	313000000		72.1972	328000000		68.44	412000000
72.5371	312000000		72.2147	328000000		68.4543	412000000
72.5547	312000000		72.2323	327000000		68.4687	412000000
72.5723	311000000		72.2499	327000000		68.483	411000000
72.5899	311000000		72.2674	327000000		68.4974	411000000
72.6075	311000000		72.285	326000000		68.5117	410000000
72.6252	310000000		72.3026	326000000		68.5261	410000000
72.6428	310000000		72.3203	325000000		68.5405	410000000
72.6605	310000000		72.3379	325000000		68.5549	409000000
72.6782	309000000		72.3556	325000000		68.5693	409000000
72.6958	309000000		72.3732	324000000		68.5837	408000000
72.7135	308000000		72.3909	324000000		68.5981	408000000
72.7313	308000000		72.4086	324000000		68.6125	408000000
72.749	308000000		72.4263	323000000		68.6269	407000000
72.7667	307000000		72.444	323000000		68.6414	407000000
72.7845	307000000		72.4617	322000000		68.6559	406000000
72.8022	306000000		72.4794	322000000		68.6703	406000000
72.82	306000000		72.4972	322000000		68.6848	406000000
72.8378	306000000		72.515	321000000		68.6993	405000000
72.8556	305000000		72.5327	321000000		68.7138	405000000
72.8734	305000000		72.5505	320000000		68.7283	404000000
72.8912	304000000		72.5683	320000000		68.7428	404000000
72.9091	304000000		72.5861	320000000		68.7573	404000000
72.9269	304000000		72.604	319000000		68.7718	403000000
72.9448	303000000		72.6218	319000000		68.7863	403000000
72.9627	303000000		72.6397	319000000		68.8009	402000000
72.9806	302000000		72.6575	318000000		68.8154	402000000
72.9985	302000000		72.6754	318000000		68.83	402000000
73.0164	302000000		72.6933	317000000		68.8446	401000000
73.0343	301000000		72.7112	317000000		68.8591	401000000
73.0523	301000000		72.7291	317000000		68.8737	400000000
73.0702	300000000		72.7471	316000000		68.8883	400000000
73.0882	300000000		72.765	316000000		68.9029	400000000
73.1062	300000000		72.783	316000000		68.9176	399000000
73.1242	299000000		72.8009	315000000		68.9322	399000000
73.1422	299000000		72.8189	315000000		68.9468	398000000
73.1602	299000000		72.8369	314000000		68.9615	398000000
73.1782	298000000		72.8549	314000000		68.9761	398000000
73.1963	298000000		72.8729	314000000		68.9908	397000000
73.2143	297000000		72.891	313000000		69.0055	397000000
73.2324	297000000		72.909	313000000		69.0201	396000000
73.2505	297000000		72.9271	312000000		69.0348	396000000
73.2685	296000000		72.9452	312000000		69.0495	396000000
73.2866	296000000		72.9633	312000000		69.0642	395000000
73.3048	295000000		72.9814	311000000		69.079	395000000
73.3229	295000000		72.9995	311000000		69.0937	394000000
73.341	295000000		73.0176	311000000		69.1084	394000000
73.3592	294000000		73.0357	310000000		69.1232	394000000
73.3774	294000000		73.0539	310000000		69.1379	393000000
73.3955	293000000		73.0721	309000000		69.1527	393000000
73.4137	293000000		73.0902	309000000		69.1675	392000000
73.4319	293000000		73.1084	309000000		69.1822	392000000
73.4502	292000000		73.1266	308000000		69.197	392000000
73.4684	292000000		73.1448	308000000		69.2118	391000000
73.4866	292000000		73.1631	308000000		69.2266	391000000
73.5049	291000000		73.1813	307000000		69.2415	390000000
73.5232	291000000		73.1996	307000000		69.2563	390000000
73.5414	290000000		73.2178	306000000		69.2711	390000000
73.5597	290000000		73.2361	306000000		69.286	389000000
73.578	290000000		73.2544	306000000		69.3008	389000000
73.5964	289000000		73.2727	305000000		69.3157	388000000
73.6147	289000000		73.291	305000000		69.3306	388000000
73.633	288000000		73.3094	304000000		69.3455	388000000
73.6514	288000000		73.3277	304000000		69.3603	387000000
73.6698	288000000		73.3461	304000000		69.3752	387000000
73.6881	287000000		73.3645	303000000		69.3902	386000000
73.7065	287000000		73.3829	303000000		69.4051	386000000
73.725	286000000		73.4013	303000000		69.42	386000000
73.7434	286000000		73.4197	302000000		69.435	385000000
73.7618	286000000		73.4381	302000000		69.4499	385000000
73.7802	285000000		73.4565	301000000		69.4649	384000000
73.7987	285000000		73.475	301000000		69.4798	384000000
[truncated: 2,397 more rows]

## Sheet: 7 g
NTA	AF4-MALS
18900000000	2890000000
37800000000	5130000000
55100000000	8330000000

## Sheet: 7 h
fNTA	AUC FLD
8960000000	0.598
17900000000	3.668
35800000000	6.212
42800000000	10.67
